# Supplementary material for: Urinary Proteome Analysis Identified Neprilysin and VCAM as Proteins Involved in Diabetic Nephropathy
Source: J Diabetes Res. 2018 Apr 29;2018:6165303. doi: 10.1155/2018/6165303 (PMC5949160; doi:10.1155/2018/6165303)
Supplement: Supplementary Materials — Supplementary Tables: the excel file includes (1) peptides identified by urine proteomics with intensities and identification scores: all peptides and protein groups (tab “All_data”) and unambiguous peptides pointing to a single protein that were used for statistical analysis (tab “Unique”); (2) differentially expressed proteins identified for each evaluated cohort comparison and which are direct effectors of DN, as well as the DN motives associated; (3) DN (tab “Key proteins DN”) and losartan (tab “Key proteins losartan”) key protein data containing the following columns: activation (sign of activation); DN effector (indicates whether it is a DN effector and the associated motive); presence in cohort comparisons in our proteomic data (the protein is also differentially abundant from the cohort comparison (d = 0) or it is directly linked to one of them (d = 1); urine presence (if the protein is easily measurable in urine according to bibliography review). Data added as an additional file through Manuscript Tracking System. [file 6165303.f1.xlsx]

## Sheet: All_data
Confidence Level	Search ID	Sequence	Unique Sequence ID	PSM Ambiguity	Protein Descriptions	# Proteins	# Protein Groups	Protein Group Accessions	Modifications	Activation Type	DeltaScore	DeltaCn	Rank	Pool1_Control	Pool1_Basal	Pool1_Tratado	Pool2_Control	Pool2_Basal	Pool2_Tratado	Quan Info	Quan Usage	QuanResultID	q-Value	PEP	Decoy Peptides Matched	Peptides Matched	XCorr	# Missed Cleavages	Intensity	Charge	m/z [Da]	MH+ [Da]	Delta Mass [Da]	Delta Mass [PPM]	RT [min]	First Scan	Last Scan	MS Order	Ions Matched	Matched Ions	Total Ions	Spectrum File	Annotation		Pool1_Control	Pool1_Basal	Pool1_Tratado	Pool2_Control	Pool2_Basal
High	A	eGGQTAPASTR	143	Unambiguous	cDNA FLJ35478 fis, clone SMINT2007796, highly similar to Gelsolin OS=Homo sapiens PE=2 SV=1 - [B3KS49_HUMAN]	11	1	B3KS49	N-Term(TMT6plex)	CID	1	0	1	1973						No Quan Values	Not Used	9756	0.002	0.0394	624	560	1.49	0	6202	2	652.343	1303.68	0	-1.08	0.32	521	522	MS2	0/0	0	0	2ms21_2014_479_PFL_Fr1.mgf			1973
High	A	aGAEPASER	159	Unambiguous	cDNA FLJ53075, highly similar to Kininogen-1 OS=Homo sapiens PE=2 SV=1 - [B4DPP8_HUMAN]	4	1	B4DPP8	N-Term(TMT6plex)	CID	1	0	1	9387	2411	2872	11910	3958	5457	Unique	Used	9761	0.002	0.0828	342	346	2.73	0	56120	2	558.796	1116.58	0	0.15	0.32	540	541	MS2	0/0	0	0	2ms21_2014_479_PFL_Fr1.mgf			9387	2411	2872	11910	3958
Middle	A	aSGAGk	199	Unambiguous		0	0		N-Term(TMT6plex); K6(TMT6plex)	CID	1	0	1	19380	111900	59540	12210	69480	117600	No Proteins	Not Used	9771	0.029	0.448	425	423	0.98	0	440100	2	474.797	948.588	0	-0.2	0.33	563	564	MS2	0/0	0	0	2ms21_2014_479_PFL_Fr1.mgf			19380	111900	59540	12210	69480
High	A	aSVDSGSSEEQGGSSR	213	Unambiguous	Polymeric immunoglobulin receptor OS=Homo sapiens GN=PIGR PE=1 SV=4 - [PIGR_HUMAN]	1	1	P01833	N-Term(TMT6plex)	CID	1	0	1		932.2		1864			No Quan Values	Not Used	9774	0	3.46e-05	236	209	4.05	0	55950	3	590.276	1768.81	0	-0.84	0.33	570	571	MS2	0/0	0	0	2ms21_2014_479_PFL_Fr1.mgf				932.2		1864
High	A	aSVDSGSSEEQGGSSR	213	Unambiguous	Polymeric immunoglobulin receptor OS=Homo sapiens GN=PIGR PE=1 SV=4 - [PIGR_HUMAN]	1	1	P01833	N-Term(TMT6plex)	CID	1	0	1	36110	22400	31780	46760	16910	29420	Unique	Used	9775	0	0.000126	226	194	4.38	0	289000	2	884.91	1768.81	0	-1.11	0.33	572	573	MS2	0/0	0	0	2ms21_2014_479_PFL_Fr1.mgf			36110	22400	31780	46760	16910
High	A	aQAGANTRPcPS	219	Unambiguous	Heparan sulfate proteoglycan 2 (Perlecan), isoform CRA_b OS=Homo sapiens GN=HSPG2 PE=4 SV=1 - [A0A024RAB6_HUMAN]	3	1	A0A024RAB6	N-Term(TMT6plex); C10(Carbamidomethyl)	CID	1	0	1	16310	5647	8186	16900	3978	9284	Unique	Used	9776	0.001	0.00468	512	492	3.33	0	89430	2	729.87	1458.73	0	-0.19	0.33	574	575	MS2	0/0	0	0	2ms21_2014_479_PFL_Fr1.mgf			16310	5647	8186	16900	3978
High	A	aQAGANTRPcPS	219	Unambiguous	Heparan sulfate proteoglycan 2 (Perlecan), isoform CRA_b OS=Homo sapiens GN=HSPG2 PE=4 SV=1 - [A0A024RAB6_HUMAN]	3	1	A0A024RAB6	N-Term(TMT6plex); C10(Carbamidomethyl)	CID	1	0	1				1915			No Quan Values	Not Used	9777	0	0.00225	517	496	3.26	0	12170	3	486.916	1458.73	0	-0.07	0.33	576	577	MS2	0/0	0	0	2ms21_2014_479_PFL_Fr1.mgf						1915
High	A	qADSGSSEEk	291	Unambiguous	Isoform D of Osteopontin OS=Homo sapiens GN=SPP1 - [OSTP_HUMAN]	5	1	P10451-4	N-Term(TMT6plex); K10(TMT6plex)	CID	1	0	1	33320	28860	37010	37360	31450	31370	Unique	Used	9795	0.001	0.015	809	838	2.68	0	245200	2	748.386	1495.76	0	0.25	0.33	616	617	MS2	0/0	0	0	2ms21_2014_479_PFL_Fr1.mgf			33320	28860	37010	37360	31450
Middle	A	aSGVPDR	332	Unambiguous		0	0		N-Term(TMT6plex)	CID	1	0	1	34810	27340	32710	22240	19000	39550	No Proteins	Not Used	9806	0.024	0.413	240	270	1.78	0	227200	2	465.764	930.52	0	-0.89	0.35	640	641	MS2	0/0	0	0	2ms21_2014_479_PFL_Fr1.mgf			34810	27340	32710	22240	19000
Middle	A	eTTcSk	336	Unambiguous	cDNA FLJ53075, highly similar to Kininogen-1 OS=Homo sapiens PE=2 SV=1 - [B4DPP8_HUMAN]	6	1	B4DPP8	N-Term(TMT6plex); C4(Carbamidomethyl); K6(TMT6plex)	CID	1	0	1	89010	42630	43210	93210	62310	60110	Unique	Used	9808	0.012	0.24	584	629	1.69	0	449600	2	592.323	1183.64	0	0.32	0.35	645	646	MS2	0/0	0	0	2ms21_2014_479_PFL_Fr1.mgf			89010	42630	43210	93210	62310
Middle	A	aGAPGk	411	Unambiguous		0	0		N-Term(TMT6plex); K6(TMT6plex)	CID	0	0	1	56840	65170	67990	39580	69110	76780	No Proteins	Not Used	9824	0.027	0.435	836	812	1.39	0	453900	2	479.808	958.609	0	0.32	0.35	680	681	MS2	0/0	0	0	2ms21_2014_479_PFL_Fr1.mgf			56840	65170	67990	39580	69110
High	A	gDAGQPGEk	436	Unambiguous		0	0		N-Term(TMT6plex); K9(TMT6plex)	CID	1	0	1	64810	21220	38040	160300	20410	56270	No Proteins	Not Used	9830	0.002	0.0783	993	982	1.77	0	431100	2	658.864	1316.72	0	0.1	0.35	693	694	MS2	0/0	0	0	2ms21_2014_479_PFL_Fr1.mgf			64810	21220	38040	160300	20410
Middle	A	aSEPGk	505	Unambiguous		0	0		N-Term(TMT6plex); K6(TMT6plex)	CID	1	0	1	9255	13230	13280	11940	7815	14020	No Proteins	Not Used	9848	0.013	0.261	1444	1370	1.58	0	86480	2	523.815	1046.62	0	-1.03	0.37	733	734	MS2	0/0	0	0	2ms21_2014_479_PFL_Fr1.mgf			9255	13230	13280	11940	7815
High	A	aTVNPSAPR	551	Unambiguous	Monocyte differentiation antigen CD14 OS=Homo sapiens PE=2 SV=1 - [B2R888_HUMAN]	3	1	B2R888	N-Term(TMT6plex)	CID	1	0	1	35810	19190	21420	34300	14730	23420	Unique	Used	9860	0.001	0.00725	570	591	3.12	0	205700	2	571.329	1141.65	0	-1.26	0.37	760	761	MS2	0/0	0	0	2ms21_2014_479_PFL_Fr1.mgf			35810	19190	21420	34300	14730
High	A	aITQEQcEAR	651	Unambiguous	Glucosidase, alpha acid (Pompe disease, glycogen storage disease type II), isoform CRA_a OS=Homo sapiens GN=GAA PE=3 SV=1 - [A0A024R8Q1_HUMAN]	2	1	A0A024R8Q1	N-Term(TMT6plex); C7(Carbamidomethyl)	CID	1	0	1	8601	7948	15940	16300	8231	14520	Unique	Used	9888	0.002	0.0316	564	546	2.98	0	103600	2	717.864	1434.72	0	-0.7	0.38	821	822	MS2	0/0	0	0	2ms21_2014_479_PFL_Fr1.mgf			8601	7948	15940	16300	8231
Middle	A	gADPSk	653	Unambiguous		0	0		N-Term(TMT6plex); K6(TMT6plex)	CID	1	0	1	26140	13590	22090	56930	13730	23090	No Proteins	Not Used	9889	0.026	0.422	1292	1306	1.62	0	191400	2	516.807	1032.61	0	-1.38	0.38	823	824	MS2	0/0	0	0	2ms21_2014_479_PFL_Fr1.mgf			26140	13590	22090	56930	13730
High	A	gGGGGGYGSGGSSYGSGGGSYGSGGGGGGGR	684	Unambiguous	Keratin 1 OS=Homo sapiens GN=KRT1 PE=3 SV=1 - [H6VRF8_HUMAN]	7	1	H6VRF8	N-Term(TMT6plex)	CID	1	0	1		1012	1115			1265	No Quan Values	Not Used	9898	0	1.37e-09	131	134	7.15	0	44810	3	871.715	2613.13	0.01	6.12	0.4	843	844	MS2	0/0	0	0	2ms21_2014_479_PFL_Fr1.mgf				1012	1115
Middle	A	aTGIPAR	688	Unambiguous		0	0		N-Term(TMT6plex)	CID	1	0	1	75950	33020	49010	69460	54410	56150	No Proteins	Not Used	9900	0.032	0.488	260	270	1.84	0	438700	2	457.785	914.563	0	0.6	0.4	848	849	MS2	0/0	0	0	2ms21_2014_479_PFL_Fr1.mgf			75950	33020	49010	69460	54410
High	A	eGDcPVQSGk	760	Unambiguous	cDNA FLJ53075, highly similar to Kininogen-1 OS=Homo sapiens PE=2 SV=1 - [B4DPP8_HUMAN]	6	1	B4DPP8	N-Term(TMT6plex); C4(Carbamidomethyl); K10(TMT6plex)	CID	1	0	1	432300	225800	241300	441500	278300	306200	Unique	Used	9920	0	0.0024	961	911	3.02	0	2453000	2	767.901	1534.79	0	0.24	0.4	892	893	MS2	0/0	0	0	2ms21_2014_479_PFL_Fr1.mgf			432300	225800	241300	441500	278300
High	A	eGDcPVQSGk	760	Unambiguous	cDNA FLJ53075, highly similar to Kininogen-1 OS=Homo sapiens PE=2 SV=1 - [B4DPP8_HUMAN]	6	1	B4DPP8	N-Term(TMT6plex); C4(Carbamidomethyl); K10(TMT6plex)	CID	1	0	1	110600	56080	55190	106200	67790	77770	Unique	Used	9921	0.001	0.00792	961	909	2.26	0	1050000	3	512.269	1534.79	0	0.16	0.4	894	895	MS2	0/0	0	0	2ms21_2014_479_PFL_Fr1.mgf			110600	56080	55190	106200	67790
High	A	aTGIPDR	776	Unambiguous	Epididymis luminal protein 213 OS=Homo sapiens GN=HEL-213 PE=2 SV=1 - [V9HW34_HUMAN]|Myosin-reactive immunoglobulin light chain variable region (Fragment) OS=Homo sapiens PE=2 SV=1 - [Q9UL78_HUMAN]	5	2	V9HW34;Q9UL78	N-Term(TMT6plex)	CID	1	0	1	122900	67410	94640	80340	71900	100800	Not Unique	Not Used	9925	0.003	0.11	386	378	1.64	0	738700	2	479.78	958.552	0	0.16	0.4	903	904	MS2	0/0	0	0	2ms21_2014_479_PFL_Fr1.mgf			122900	67410	94640	80340	71900
High	A	aTANSQVmGSANSTLR	786	Unambiguous		0	0		N-Term(TMT6plex); M8(Oxidation)	CID	1	0	1	4901	4089	8574	10050	2592	3572	No Proteins	Not Used	9928	0	0.000875	1193	1172	2.56	0	65520	2	926.972	1852.94	0	-1.45	0.4	909	910	MS2	0/0	0	0	2ms21_2014_479_PFL_Fr1.mgf			4901	4089	8574	10050	2592
High	A	gTYSTTVTGR	817	Unambiguous		0	0		N-Term(TMT6plex)	CID	1	0	1	94460	55230	87820	153600	175200	223600	No Proteins	Not Used	9936	0.001	0.0151	654	643	2.84	0	1134000	2	636.343	1271.68	0	-0.35	0.42	927	928	MS2	0/0	0	0	2ms21_2014_479_PFL_Fr1.mgf			94460	55230	87820	153600	175200
Middle	A	sGNEDEFR	821	Unambiguous	Pancreatic alpha-amylase OS=Homo sapiens GN=AMY2A PE=1 SV=2 - [AMYP_HUMAN]	5	1	P04746	N-Term(TMT6plex)	CID	1	0	1	43280	26590	33400	46800	23620	30860	Unique	Used	9937	0.025	0.416	167	186	1.75	0	249900	2	591.783	1182.56	0	0.51	0.42	929	930	MS2	0/0	0	0	2ms21_2014_479_PFL_Fr1.mgf			43280	26590	33400	46800	23620
High	A	gPAGPSGPAGk	836	Unambiguous		0	0		N-Term(TMT6plex); K11(TMT6plex)	CID	1	0	1	16030	11650	11650	29260	8548	10010	No Proteins	Not Used	9941	0.001	0.0286	1109	1177	1.95	0	108100	2	677.402	1353.8	0	5.12	0.42	938	939	MS2	0/0	0	0	2ms21_2014_479_PFL_Fr1.mgf			16030	11650	11650	29260	8548
Middle	A	aDSSPVk	840	Unambiguous	IGL@ protein OS=Homo sapiens GN=IGL@ PE=2 SV=1 - [Q567P1_HUMAN]|Uncharacterized protein OS=Homo sapiens PE=2 SV=1 - [Q6GMV8_HUMAN]	32	2	Q567P1;Q6GMV8	N-Term(TMT6plex); K7(TMT6plex)	CID	1	0	1	16560	12900	18950	13920	16210	21240	Not Unique	Not Used	9942	0.029	0.474	1410	1391	1.81	0	178600	2	581.348	1161.69	0	-0.07	0.42	940	941	MS2	0/0	0	0	2ms21_2014_479_PFL_Fr1.mgf			16560	12900	18950	13920	16210
Middle	A	aDGSPVk	844	Unambiguous		0	0		N-Term(TMT6plex); K7(TMT6plex)	CID	1	0	1	132000	166200	156100	162700	143500	206100	No Proteins	Not Used	9943	0.016	0.315	1500	1513	2	0	1155000	2	566.342	1131.68	0	-0.45	0.42	942	943	MS2	0/0	0	0	2ms21_2014_479_PFL_Fr1.mgf			132000	166200	156100	162700	143500
Middle	A	scPNPGEIR	873	Unambiguous	Complement decay-accelerating factor (Fragment) OS=Homo sapiens GN=CD55 PE=1 SV=1 - [H3BLV0_HUMAN]	11	1	H3BLV0	N-Term(TMT6plex); C2(Carbamidomethyl)	CID	1	0	1	28550	23420	21940	38230	17680	27770	Unique	Used	9951	0.013	0.244	407	423	2.96	0	216700	2	629.825	1258.64	0	1.72	0.42	960	961	MS2	0/0	0	0	2ms21_2014_479_PFL_Fr1.mgf			28550	23420	21940	38230	17680
High	A	aDSSPVk	840	Unambiguous	IGL@ protein OS=Homo sapiens GN=IGL@ PE=2 SV=1 - [Q567P1_HUMAN]|Uncharacterized protein OS=Homo sapiens PE=2 SV=1 - [Q6GMV8_HUMAN]	32	2	Q567P1;Q6GMV8	N-Term(TMT6plex); K7(TMT6plex)	CID	1	0	1	157000	137100	165900	100700	133100	181900	Not Unique	Not Used	9954	0.002	0.0893	1423	1403	1.86	0	1060000	2	581.348	1161.69	0	0.35	0.42	967	968	MS2	0/0	0	0	2ms21_2014_479_PFL_Fr1.mgf			157000	137100	165900	100700	133100
High	A	gQESSTDIk	889	Unambiguous	Complement C1r subcomponent-like protein OS=Homo sapiens GN=C1RL PE=1 SV=2 - [C1RL_HUMAN]	6	1	Q9NZP8	N-Term(TMT6plex); K9(TMT6plex)	CID	1	0	1	81870	66870	68180	98840	66880	79080	Unique	Used	9955	0.001	0.0238	1371	1430	2.13	0	581900	2	711.896	1422.79	0	1.04	0.42	969	970	MS2	0/0	0	0	2ms21_2014_479_PFL_Fr1.mgf			81870	66870	68180	98840	66880
High	A	ecLQTcR	905	Unambiguous	Protein AMBP OS=Homo sapiens GN=AMBP PE=1 SV=1 - [AMBP_HUMAN]	1	1	P02760	N-Term(TMT6plex); C2(Carbamidomethyl); C6(Carbamidomethyl)	CID	1	0	1	62990	45400	36220	94810	39820	56570	Unique	Used	9959	0.002	0.0379	235	223	2.71	0	489700	2	598.292	1195.58	0	-0.13	0.42	978	979	MS2	0/0	0	0	2ms21_2014_479_PFL_Fr1.mgf			62990	45400	36220	94810	39820
High	A	dDNPNLPR	909	Unambiguous	Albumin (Fragment) OS=Homo sapiens PE=2 SV=1 - [F6KPG5_HUMAN]	6	1	F6KPG5	N-Term(TMT6plex)	CID	1	0	1	60960	82470	42380	76190	55770	55110	Unique	Used	9960	0.002	0.0412	420	480	2.62	0	545900	2	585.308	1169.61	0	-1.57	0.42	980	981	MS2	0/0	0	0	2ms21_2014_479_PFL_Fr1.mgf			60960	82470	42380	76190	55770
High	A	gVEVAAGASSGGETR	926	Unambiguous	Tumor necrosis factor receptor superfamily member 19L OS=Homo sapiens GN=RELT PE=1 SV=1 - [TR19L_HUMAN]	1	1	Q969Z4	N-Term(TMT6plex)	CID	1	0	1	4765	2852	2623	4668	3101	4447	Unique	Used	9964	0	2.27e-05	935	935	3.66	0	106500	3	526.276	1576.81	0	0.46	0.42	989	990	MS2	0/0	0	0	2ms21_2014_479_PFL_Fr1.mgf			4765	2852	2623	4668	3101
High	A	gVEVAAGASSGGETR	926	Unambiguous	Tumor necrosis factor receptor superfamily member 19L OS=Homo sapiens GN=RELT PE=1 SV=1 - [TR19L_HUMAN]	1	1	Q969Z4	N-Term(TMT6plex)	CID	1	0	1	267300	79320	19840	236600	139000	111400	Unique	Used	9965	0	0.000149	933	934	5.59	0	1299000	2	788.91	1576.81	0	0	0.42	991	992	MS2	0/0	0	0	2ms21_2014_479_PFL_Fr1.mgf			267300	79320	19840	236600	139000
Middle	A	iEGSNk	934	Unambiguous	cDNA FLJ35478 fis, clone SMINT2007796, highly similar to Gelsolin OS=Homo sapiens PE=2 SV=1 - [B3KS49_HUMAN]	11	1	B3KS49	N-Term(TMT6plex); K6(TMT6plex)	CID	1	0	1	65150	39460	42520	84910	35790	50680	Unique	Used	9967	0.016	0.326	1133	1108	1.3	0	366900	2	553.337	1105.67	0	4.98	0.42	995	996	MS2	0/0	0	0	2ms21_2014_479_PFL_Fr1.mgf			65150	39460	42520	84910	35790
High	A	sYSESSSTSSSESLNSSAPR	988	Unambiguous	Isoform 2 of Protein HEG homolog 1 OS=Homo sapiens GN=HEG1 - [HEG1_HUMAN]	2	1	Q9ULI3-2	N-Term(TMT6plex)	CID	1	0	1		1090	1194		1170		No Quan Values	Not Used	9979	0.002	0.0405	371	381	3.05	0	26270	3	760.355	2279.05	0	0.79	0.43	1022	1023	MS2	0/0	0	0	2ms21_2014_479_PFL_Fr1.mgf				1090	1194		1170
Middle	A	aVGNLR	990	Unambiguous	Transferrin variant (Fragment) OS=Homo sapiens PE=2 SV=1 - [Q53H26_HUMAN]	6	1	Q53H26	N-Term(TMT6plex)	CID	1	0	1	42090	594000	247000	26100	463300	491200	Unique	Used	9980	0.037	0.54	205	221	2.17	0	2661000	2	429.772	858.536	0	-0.03	0.43	1024	1025	MS2	0/0	0	0	2ms21_2014_479_PFL_Fr1.mgf			42090	594000	247000	26100	463300
High	A	sVEDcHY	997	Unambiguous	Trefoil factor 2 OS=Homo sapiens GN=TFF2 PE=1 SV=2 - [TFF2_HUMAN]	1	1	Q03403	N-Term(TMT6plex); C5(Carbamidomethyl)	CID	1	0	1	119300	72690	81660	113300	69060	82180	Unique	Used	9982	0.006	0.18	36	25	0.92	0	1677000	2	569.755	1138.5	0	-0.38	0.43	1028	1029	MS2	0/0	0	0	2ms21_2014_479_PFL_Fr1.mgf			119300	72690	81660	113300	69060
High	A	sYSESSSTSSSESLNSSAPR	988	Unambiguous	Isoform 2 of Protein HEG homolog 1 OS=Homo sapiens GN=HEG1 - [HEG1_HUMAN]	2	1	Q9ULI3-2	N-Term(TMT6plex)	CID	1	0	1	33080	26330	32140	41420	31130	34900	Unique	Used	9985	0	0.000168	414	416	6.89	0	346400	2	1140.03	2279.05	0	2.83	0.43	1035	1036	MS2	0/0	0	0	2ms21_2014_479_PFL_Fr1.mgf			33080	26330	32140	41420	31130
High	A	qDSQLQk	1011	Unambiguous	Zinc-alpha-2-glycoprotein OS=Homo sapiens GN=AZGP1 PE=1 SV=2 - [ZA2G_HUMAN]	1	1	P25311	N-Term(TMT6plex); K7(TMT6plex)	CID	1	0	1	21070	48940	42540	35880	46280	68020	Unique	Used	9987	0.002	0.047	1598	1606	2.25	0	323200	2	652.883	1304.76	0	1.61	0.43	1039	1040	MS2	0/0	0	0	2ms21_2014_479_PFL_Fr1.mgf			21070	48940	42540	35880	46280
Middle	A	dVcDPGNTk	1015	Unambiguous	Vitamin D-binding protein OS=Homo sapiens GN=GC PE=1 SV=1 - [VTDB_HUMAN]	3	1	P02774	N-Term(TMT6plex); C3(Carbamidomethyl); K9(TMT6plex)	CID	1	0	1	8654	13630	10270	10390	9914	13970	Unique	Used	9988	0.018	0.341	913	890	2.07	0	94480	3	488.59	1463.76	0	-0.23	0.43	1041	1042	MS2	0/0	0	0	2ms21_2014_479_PFL_Fr1.mgf			8654	13630	10270	10390	9914
High	A	qcQPSDTVcASVR	1017	Unambiguous		0	0		N-Term(TMT6plex); C2(Carbamidomethyl); C9(Carbamidomethyl)	CID	1	0	1	20930	16180	18230	29280	9893	21570	No Proteins	Not Used	9989	0	0.000575	322	323	3.97	0	186700	2	868.917	1736.83	0	0.11	0.43	1044	1045	MS2	0/0	0	0	2ms21_2014_479_PFL_Fr1.mgf			20930	16180	18230	29280	9893
High	A	aGcVAESTAVcR	1032	Unambiguous		0	0		N-Term(TMT6plex); C3(Carbamidomethyl); C11(Carbamidomethyl)	CID	1	0	1	16560	5941	5976	5772	8244	4960	No Proteins	Not Used	9994	0	0.00103	496	506	4.7	0	94480	2	755.373	1509.74	0	2.33	0.43	1055	1056	MS2	0/0	0	0	2ms21_2014_479_PFL_Fr1.mgf			16560	5941	5976	5772	8244
Middle	A	lSSGAk	1042	Unambiguous	Isoform 2 of Mannan-binding lectin serine protease 2 OS=Homo sapiens GN=MASP2 - [MASP2_HUMAN]	2	1	O00187-2	N-Term(TMT6plex); K6(TMT6plex)	CID	1	0	1	166500	115000	110200	140100	214500	183900	Unique	Used	9996	0.046	0.589	426	408	1.77	0	1099000	2	510.826	1020.64	0	-0.8	0.43	1059	1060	MS2	0/0	0	0	2ms21_2014_479_PFL_Fr1.mgf			166500	115000	110200	140100	214500
High	A	aATGEcTATVGk	1048	Unambiguous	cDNA FLJ53075, highly similar to Kininogen-1 OS=Homo sapiens PE=2 SV=1 - [B4DPP8_HUMAN]	6	1	B4DPP8	N-Term(TMT6plex); C6(Carbamidomethyl); K12(TMT6plex)	CID	1	0	1	234500	105800	120000	213600	130400	126600	Unique	Used	9998	0	0.000178	1464	1592	4.17	0	1261000	2	812.441	1623.87	0	-1.78	0.43	1064	1065	MS2	0/0	0	0	2ms21_2014_479_PFL_Fr1.mgf			234500	105800	120000	213600	130400
High	A	aATGEcTATVGk	1048	Unambiguous	cDNA FLJ53075, highly similar to Kininogen-1 OS=Homo sapiens PE=2 SV=1 - [B4DPP8_HUMAN]	6	1	B4DPP8	N-Term(TMT6plex); C6(Carbamidomethyl); K12(TMT6plex)	CID	1	0	1	9071000	4127000	4896000	8790000	5573000	5809000	Unique	Used	10003	0	5.8e-05	1505	1663	4.11	0	48170000	2	812.442	1623.88	0	-0.12	0.43	1075	1076	MS2	0/0	0	0	2ms21_2014_479_PFL_Fr1.mgf			9071000	4127000	4896000	8790000	5573000
High	A	aGVETTTPSk	1100	Unambiguous	IGL@ protein OS=Homo sapiens GN=IGL@ PE=2 SV=1 - [Q567P1_HUMAN]|Uncharacterized protein OS=Homo sapiens PE=2 SV=1 - [Q6GMV8_HUMAN]	33	2	Q567P1;Q6GMV8	N-Term(TMT6plex); K10(TMT6plex)	CID	1	0	1	585600	501100	625900	370100	431300	586300	Not Unique	Not Used	10012	0.001	0.00451	1831	1852	3.57	0	3923000	2	724.923	1448.84	0	1.25	0.45	1096	1097	MS2	0/0	0	0	2ms21_2014_479_PFL_Fr1.mgf			585600	501100	625900	370100	431300
High	A	aSVSVTAEDEGTQR	1104	Unambiguous		0	0		N-Term(TMT6plex)	CID	1	0	1	73490	66470	39220	62040	37730	46450	No Proteins	Not Used	10013	0	0.000376	917	888	4.19	0	564000	2	839.926	1678.85	0	0.54	0.45	1098	1099	MS2	0/0	0	0	2ms21_2014_479_PFL_Fr1.mgf			73490	66470	39220	62040	37730
Middle	A	iQGTcYR	1108	Unambiguous		0	0		N-Term(TMT6plex); C5(Carbamidomethyl)	CID	1	0	1	2402	2498		2994		2461	No Proteins	Not Used	10014	0.012	0.214	399	440	2.22	0	80580	2	563.798	1126.59	0	0.24	0.45	1101	1102	MS2	0/0	0	0	2ms21_2014_479_PFL_Fr1.mgf			2402	2498		2994
High	A	iSYQSSSTEER	1123	Unambiguous	cDNA FLJ78262, highly similar to Homo sapiens semenogelin II (SEMG2), mRNA OS=Homo sapiens PE=2 SV=1 - [A8K6Z6_HUMAN]	4	1	A8K6Z6	N-Term(TMT6plex)	CID	1	0	1	7256	80890	19390	12170	5059	6088	Unique	Used	10018	0.002	0.0966	321	304	2.7	0	183700	2	758.37	1515.73	-0.01	-10.65	0.45	1112	1113	MS2	0/0	0	0	2ms21_2014_479_PFL_Fr1.mgf			7256	80890	19390	12170	5059
High	A	sSQGGSLPSEEk	1149	Unambiguous		0	0		N-Term(TMT6plex); K12(TMT6plex)	CID	1	0	1	61030	44160	41750	115800	50930	60220	No Proteins	Not Used	10026	0	0.00225	1630	1675	3.33	0	485600	2	832.451	1663.89	0	2.02	0.45	1130	1131	MS2	0/0	0	0	2ms21_2014_479_PFL_Fr1.mgf			61030	44160	41750	115800	50930
High	A	dVPcEDk	1160	Unambiguous	cDNA FLJ75763, highly similar to Homo sapiens regenerating islet-derived 1 alpha (pancreatic stone protein, pancreatic thread protein) (REG1A), mRNA OS=Homo sapiens PE=2 SV=1 - [A8K7G6_HUMAN]	2	1	A8K7G6	N-Term(TMT6plex); C4(Carbamidomethyl); K7(TMT6plex)	CID	1	0	1	55580	28960	37000	59040	20500	24110	Unique	Used	10027	0.007	0.184	815	783	0.92	0	249100	2	660.847	1320.69	0	0.4	0.45	1132	1133	MS2	0/0	0	0	2ms21_2014_479_PFL_Fr1.mgf			55580	28960	37000	59040	20500
High	A	gSTGTQLck	1165	Unambiguous		0	0		N-Term(TMT6plex); C8(Carbamidomethyl); K9(TMT6plex)	CID	1	0	1	252400	128400	117800	231900	158100	141200	No Proteins	Not Used	10029	0.001	0.022	1280	1253	2.72	0	1202000	2	705.392	1409.78	0	-4.27	0.45	1137	1138	MS2	0/0	0	0	2ms21_2014_479_PFL_Fr1.mgf			252400	128400	117800	231900	158100
High	A	gAcGLQTk	1200	Unambiguous		0	0		N-Term(TMT6plex); C3(Carbamidomethyl); K8(TMT6plex)	CID	1	0	1	166400	122800	78350	229800	114600	159600	No Proteins	Not Used	10038	0.001	0.0196	1440	1489	2.42	0	1051000	2	646.873	1292.74	0	-0.89	0.45	1157	1158	MS2	0/0	0	0	2ms21_2014_479_PFL_Fr1.mgf			166400	122800	78350	229800	114600
Middle	A	lEGWmmDNNFSHHWk	1216	Unambiguous		0	0		N-Term(TMT6plex); M5(Oxidation); M6(Oxidation); K15(TMT6plex)	CID	1	0	1							No Proteins	Not Used		0.013	0.255	988	1003	1.85	0	156000	3	808.061	2422.17	0.01	8.82	0.47	1165	1166	MS2	0/0	0	0	2ms21_2014_479_PFL_Fr1.mgf
High	A	eTYGEmADccAk	1233	Unambiguous	Albumin (Fragment) OS=Homo sapiens PE=2 SV=1 - [F6KPG5_HUMAN]	6	1	F6KPG5	N-Term(TMT6plex); M6(Oxidation); C9(Carbamidomethyl); C10(Carbamidomethyl); K12(TMT6plex)	CID	1	0	1	10840	14090	6749	15300	7316	9111	Unique	Used	10045	0	0.000588	157	140	3.72	0	590800	3	636.957	1908.86	0	0.43	0.47	1175	1176	MS2	0/0	0	0	2ms21_2014_479_PFL_Fr1.mgf			10840	14090	6749	15300	7316
High	A	fNSEKEcQETcIQG	1250	Unambiguous		0	0		N-Term(TMT6plex); C7(Carbamidomethyl); C11(Carbamidomethyl)	CID	1	0	1	17970	14410	10750	23920	3643	10870	No Proteins	Not Used	10050	0.007	0.184	169	132	3.22	1	264800	2	979.943	1958.88	0	0.49	0.47	1186	1187	MS2	0/0	0	0	2ms21_2014_479_PFL_Fr1.mgf			17970	14410	10750	23920	3643
High	A	aTSITVTGSGScR	1275	Unambiguous	Dystroglycan 1 (Dystrophin-associated glycoprotein 1), isoform CRA_a OS=Homo sapiens GN=DAG1 PE=4 SV=1 - [A0A024R2W4_HUMAN]	2	1	A0A024R2W4	N-Term(TMT6plex); C12(Carbamidomethyl)	CID	1	0	1	54120	39410	42010	45020	39980	41030	Unique	Used	10055	0	0.000463	891	852	3.88	0	385100	2	763.396	1525.78	0	-0.16	0.47	1197	1198	MS2	0/0	0	0	2ms21_2014_479_PFL_Fr1.mgf			54120	39410	42010	45020	39980
High	A	aLAGNPk	1281	Unambiguous	SH3 domain-binding glutamic acid-rich-like protein 3 OS=Homo sapiens GN=SH3BGRL3 PE=1 SV=1 - [Q5T123_HUMAN]	5	1	Q5T123	N-Term(TMT6plex); K7(TMT6plex)	CID	1	0	1	449300	277800	290400	426400	154200	324100	Unique	Used	10056	0.003	0.109	810	773	2	0	2379000	2	564.861	1128.72	0	0.76	0.47	1199	1200	MS2	0/0	0	0	2ms21_2014_479_PFL_Fr1.mgf			449300	277800	290400	426400	154200
High	A	aALSmck	1299	Unambiguous	Prostaglandin-H2 D-isomerase OS=Homo sapiens GN=PTGDS PE=1 SV=1 - [PTGDS_HUMAN]	4	1	P41222	N-Term(TMT6plex); M5(Oxidation); C6(Carbamidomethyl); K7(TMT6plex)	CID	1	0	1	497200	344100	288100	502400	199600	367100	Unique	Used	10060	0.002	0.0685	943	978	1.8	0	2993000	2	627.851	1254.7	0	0.32	0.47	1208	1209	MS2	0/0	0	0	2ms21_2014_479_PFL_Fr1.mgf			497200	344100	288100	502400	199600
High	A	aTVVYQGER	1311	Unambiguous	cDNA FLJ51265, moderately similar to Beta-2-glycoprotein 1 (Beta-2-glycoprotein I) OS=Homo sapiens PE=2 SV=1 - [B4DPN0_HUMAN]	3	1	B4DPN0	N-Term(TMT6plex)	CID	1	0	1	12720	19790	22040	21670	11140	22750	Unique	Used	10063	0.002	0.0771	1211	1194	3.18	0	193200	2	626.35	1251.69	0	2.57	0.47	1214	1215	MS2	0/0	0	0	2ms21_2014_479_PFL_Fr1.mgf			12720	19790	22040	21670	11140
Middle	A	sPTVVk	1366	Unambiguous	Polymeric immunoglobulin receptor OS=Homo sapiens GN=PIGR PE=1 SV=4 - [PIGR_HUMAN]	1	1	P01833	N-Term(TMT6plex); K6(TMT6plex)	CID	1	0	1	160200	141900	155900	176800	136500	138700	Unique	Used	10076	0.018	0.34	653	649	1.57	0	1242000	2	544.857	1088.71	0	-0.95	0.47	1243	1244	MS2	0/0	0	0	2ms21_2014_479_PFL_Fr1.mgf			160200	141900	155900	176800	136500
High	A	dQcQVDSQcPGQMk	1368	Unambiguous	Isoform 2 of WAP four-disulfide core domain protein 2 OS=Homo sapiens GN=WFDC2 - [WFDC2_HUMAN]	3	1	Q14508-2	N-Term(TMT6plex); C3(Carbamidomethyl); C9(Carbamidomethyl); K14(TMT6plex)	CID	1	0	1	51800	47340	79770	66970	57880	54260	Unique	Used	10077	0	0.000394	489	470	4.33	0	532800	2	1070.01	2139.01	0	1.4	0.47	1245	1246	MS2	0/0	0	0	2ms21_2014_479_PFL_Fr1.mgf			51800	47340	79770	66970	57880
Middle	A	aTLSEk	1376	Unambiguous		0	0		N-Term(TMT6plex); K6(TMT6plex)	CID	1	0	1	51760	51710	26990	53830	31000	47480	No Proteins	Not Used	10080	0.035	0.514	756	714	2.3	0	366100	2	553.845	1106.68	0	1.32	0.48	1252	1253	MS2	0/0	0	0	2ms21_2014_479_PFL_Fr1.mgf			51760	51710	26990	53830	31000
High	A	dQcQVDSQcPGQMk	1368	Unambiguous	Isoform 2 of WAP four-disulfide core domain protein 2 OS=Homo sapiens GN=WFDC2 - [WFDC2_HUMAN]	3	1	Q14508-2	N-Term(TMT6plex); C3(Carbamidomethyl); C9(Carbamidomethyl); K14(TMT6plex)	CID	1	0	1	210400	234000	357000	289300	287400	239700	Unique	Used	10082	0	7.68e-06	474	456	3.72	0	4770000	3	713.673	2139	0	0.28	0.48	1257	1258	MS2	0/0	0	0	2ms21_2014_479_PFL_Fr1.mgf			210400	234000	357000	289300	287400
High	A	mTVTDQVNcPk	1443	Unambiguous	Apolipoprotein D OS=Homo sapiens GN=APOD PE=1 SV=1 - [APOD_HUMAN]	2	1	P05090	N-Term(TMT6plex); M1(Oxidation); C9(Carbamidomethyl); K11(TMT6plex)	CID	1	0	1	19370	16380	17450	20430	15070	19000	Unique	Used	10097	0	0.00119	1518	1461	2.5	0	287400	3	589.645	1766.92	0	0.49	0.48	1290	1291	MS2	0/0	0	0	2ms21_2014_479_PFL_Fr1.mgf			19370	16380	17450	20430	15070
Middle	A	fVGQGGAR	1510	Unambiguous	cDNA FLJ38724 fis, clone KIDNE2010151, highly similar to UROMODULIN OS=Homo sapiens PE=2 SV=1 - [B3KTU0_HUMAN]	6	1	B3KTU0	N-Term(TMT6plex)	CID	1	0	1	60300	54300	28130	76980	78580	60580	Unique	Used	10115	0.012	0.229	976	1011	2.07	0	484700	2	510.794	1020.58	0	0.9	0.48	1329	1330	MS2	0/0	0	0	2ms21_2014_479_PFL_Fr1.mgf			60300	54300	28130	76980	78580
High	A	iTEATk	1522	Unambiguous	cDNA FLJ53075, highly similar to Kininogen-1 OS=Homo sapiens PE=2 SV=1 - [B4DPP8_HUMAN]	6	1	B4DPP8	N-Term(TMT6plex); K6(TMT6plex)	CID	1	0	1	804000	450000	431300	776500	609300	581900	Unique	Used	10119	0.006	0.177	823	852	1.97	0	4487000	2	560.852	1120.7	0	-0.57	0.5	1339	1340	MS2	0/0	0	0	2ms21_2014_479_PFL_Fr1.mgf			804000	450000	431300	776500	609300
High	A	eSNEELTEScETk	1530	Unambiguous	cDNA FLJ53075, highly similar to Kininogen-1 OS=Homo sapiens PE=2 SV=1 - [B4DPP8_HUMAN]	6	1	B4DPP8	N-Term(TMT6plex); C10(Carbamidomethyl); K13(TMT6plex)	CID	1	0	1							No Quan Values	Not Used		0	0.000249	619	632	3.32	0	277800	3	671.994	2013.97	0	-1.07	0.5	1343	1344	MS2	0/0	0	0	2ms21_2014_479_PFL_Fr1.mgf
Middle	A	aDDLGk	1537	Unambiguous		0	0		N-Term(TMT6plex); K6(TMT6plex)	CID	1	0	1	23770	24950	21040	29160	26540	30780	No Proteins	Not Used	10123	0.012	0.206	1184	1224	1.79	0	247500	2	538.822	1076.64	0	1.08	0.5	1347	1348	MS2	0/0	0	0	2ms21_2014_479_PFL_Fr1.mgf			23770	24950	21040	29160	26540
High	A	eSNEELTEScETk	1530	Unambiguous	cDNA FLJ53075, highly similar to Kininogen-1 OS=Homo sapiens PE=2 SV=1 - [B4DPP8_HUMAN]	6	1	B4DPP8	N-Term(TMT6plex); C10(Carbamidomethyl); K13(TMT6plex)	CID	1	0	1	270300	133000	151200	290500	163400	153500	Unique	Used	10125	0	0.000178	697	704	5.62	0	1539000	2	1007.49	2013.97	0	1.11	0.5	1352	1353	MS2	0/0	0	0	2ms21_2014_479_PFL_Fr1.mgf			270300	133000	151200	290500	163400
High	A	aVVEVDESGTR	1550	Unambiguous	Plasma serine protease inhibitor OS=Homo sapiens GN=SERPINA5 PE=1 SV=3 - [IPSP_HUMAN]	1	1	P05154	N-Term(TMT6plex)	CID	1	0	1	12010	11800	9342	9193	12510	17500	Unique	Used	10126	0.001	0.00835	1041	1063	3.14	0	250500	3	464.251	1390.74	0	0.1	0.5	1354	1355	MS2	0/0	0	0	2ms21_2014_479_PFL_Fr1.mgf			12010	11800	9342	9193	12510
High	A	dGPcGTVLTR	1574	Unambiguous	cDNA FLJ38724 fis, clone KIDNE2010151, highly similar to UROMODULIN OS=Homo sapiens PE=2 SV=1 - [B3KTU0_HUMAN]	8	1	B3KTU0	N-Term(TMT6plex); C4(Carbamidomethyl)	CID	1	0	1	48770	41490	21730	64860	58410	39680	Unique	Used	10133	0.001	0.0178	767	734	2.81	0	612900	2	652.844	1304.68	0	-1.24	0.5	1369	1370	MS2	0/0	0	0	2ms21_2014_479_PFL_Fr1.mgf			48770	41490	21730	64860	58410
High	A	kGVcEETSGAYEk	1601	Unambiguous	Protein AMBP OS=Homo sapiens GN=AMBP PE=1 SV=1 - [AMBP_HUMAN]	1	1	P02760	N-Term(TMT6plex); K1(TMT6plex); C4(Carbamidomethyl); K13(TMT6plex)	CID	1	0	1	542900	399000	413600	601400	350800	485100	Unique	Used	10139	0	0.000242	2207	2212	4.62	1	5187000	3	715.72	2145.15	0	0.05	0.5	1383	1384	MS2	0/0	0	0	2ms21_2014_479_PFL_Fr1.mgf			542900	399000	413600	601400	350800
High	A	aDGEScSASMmYQEGk	1658	Unambiguous	Antithrombin-III OS=Homo sapiens GN=SERPINC1 PE=1 SV=1 - [ANT3_HUMAN]	1	1	P01008	N-Term(TMT6plex); C6(Carbamidomethyl); M11(Oxidation); K16(TMT6plex)	CID	1	0	1	4240	5147	4118	4576	4113	5456	Unique	Used	10153	0	8.9e-05	198	208	3.81	0	120300	3	742.336	2224.99	0	0.64	0.5	1413	1414	MS2	0/0	0	0	2ms21_2014_479_PFL_Fr1.mgf			4240	5147	4118	4576	4113
High	A	gVcEETSGAYEk	1665	Unambiguous	Protein AMBP OS=Homo sapiens GN=AMBP PE=1 SV=1 - [AMBP_HUMAN]	1	1	P02760	N-Term(TMT6plex); C3(Carbamidomethyl); K12(TMT6plex)	CID	1	0	1	35660000	26230000	27300000	45150000	20020000	27280000	Unique	Used	10155	0	0.000799	676	692	3.92	0	236300000	2	894.448	1787.89	0	-0.5	0.5	1418	1419	MS2	0/0	0	0	2ms21_2014_479_PFL_Fr1.mgf			35660000	26230000	27300000	45150000	20020000
High	A	vVNPTQk	1671	Unambiguous	Alpha-1-antitrypsin OS=Homo sapiens GN=SERPINA1 PE=1 SV=3 - [A1AT_HUMAN]	2	1	P01009	N-Term(TMT6plex); K7(TMT6plex)	CID	1	0	1	805500	3298000	1283000	279900	3007000	3036000	Unique	Used	10157	0.006	0.166	1097	1064	2.26	0	14670000	2	622.392	1243.78	0	-0.26	0.5	1422	1423	MS2	0/0	0	0	2ms21_2014_479_PFL_Fr1.mgf			805500	3298000	1283000	279900	3007000
High	A	qESDQcVMEVSDR	1720	Unambiguous	Trefoil factor 2 OS=Homo sapiens GN=TFF2 PE=1 SV=2 - [TFF2_HUMAN]	1	1	Q03403	N-Term(TMT6plex); C6(Carbamidomethyl)	CID	1	0	1	395300	296900	316700	472600	302000	253300	Unique	Used	10166	0	0.00221	143	99	3.86	0	3145000	2	906.406	1811.8	0	-2.89	0.52	1442	1443	MS2	0/0	0	0	2ms21_2014_479_PFL_Fr1.mgf			395300	296900	316700	472600	302000
High	A	qSGQcLDIDEcR	1724	Unambiguous		0	0		N-Term(TMT6plex); C5(Carbamidomethyl); C11(Carbamidomethyl)	CID	1	0	1	151100	127500	104000	190800	105400	141600	No Proteins	Not Used	10167	0	0.00158	151	145	3.71	0	1322000	2	855.39	1709.77	0	-2.93	0.52	1444	1445	MS2	0/0	0	0	2ms21_2014_479_PFL_Fr1.mgf			151100	127500	104000	190800	105400
High	A	tEAADLck	1798	Unambiguous	CD44 antigen OS=Homo sapiens GN=CD44 PE=1 SV=2 - [H0YD13_HUMAN]	26	1	H0YD13	N-Term(TMT6plex); C7(Carbamidomethyl); K8(TMT6plex)	CID	1	0	1	133500	114000	91660	146600	127500	121100	Unique	Used	10182	0.005	0.159	1513	1532	3.24	0	825900	2	683.384	1365.76	0.01	11.48	0.52	1481	1482	MS2	0/0	0	0	2ms21_2014_479_PFL_Fr1.mgf			133500	114000	91660	146600	127500
High	A	gVcEETSGAYEk	1665	Unambiguous	Protein AMBP OS=Homo sapiens GN=AMBP PE=1 SV=1 - [AMBP_HUMAN]	1	1	P02760	N-Term(TMT6plex); C3(Carbamidomethyl); K12(TMT6plex)	CID	1	0	1	20570000	14580000	16300000	26610000	12300000	16950000	Unique	Used	10189	0	0.000354	714	733	4.28	0	135300000	2	894.448	1787.89	0	0.25	0.52	1501	1502	MS2	0/0	0	0	2ms21_2014_479_PFL_Fr1.mgf			20570000	14580000	16300000	26610000	12300000
High	A	vVAGEVQVQR	1824	Unambiguous	Immunoglobulin superfamily member 8 (Fragment) OS=Homo sapiens GN=IGSF8 PE=4 SV=1 - [C9J8Z4_HUMAN]	3	1	C9J8Z4	N-Term(TMT6plex)	CID	1	0	1	704800	324300	355400	843400	265300	354300	Unique	Used	10190	0.001	0.0119	976	1006	3.25	0	4174000	2	657.391	1313.78	0	1.15	0.52	1503	1504	MS2	0/0	0	0	2ms21_2014_479_PFL_Fr1.mgf			704800	324300	355400	843400	265300
Middle	A	vTLTSEEEAR	1865	Unambiguous		0	0		N-Term(TMT6plex)	CID	1	0	1	14620	12350	18300	21760	13610	16400	No Proteins	Not Used	10201	0.029	0.469	940	944	2.68	0	188300	2	682.36	1363.71	-0.01	-10.24	0.53	1532	1533	MS2	0/0	0	0	2ms21_2014_479_PFL_Fr1.mgf			14620	12350	18300	21760	13610
High	A	aGEVQEPELR	1915	Unambiguous	Zinc-alpha-2-glycoprotein OS=Homo sapiens GN=AZGP1 PE=1 SV=2 - [ZA2G_HUMAN]	1	1	P25311	N-Term(TMT6plex)	CID	1	0	1	171400	367000	327800	277900	267700	502200	Unique	Used	10212	0.001	0.0196	929	876	2.89	0	2992000	2	678.871	1356.73	0	1.24	0.53	1559	1560	MS2	0/0	0	0	2ms21_2014_479_PFL_Fr1.mgf			171400	367000	327800	277900	267700
High	A	aATGEcTATVGk	1048	Unambiguous	cDNA FLJ53075, highly similar to Kininogen-1 OS=Homo sapiens PE=2 SV=1 - [B4DPP8_HUMAN]	6	1	B4DPP8	N-Term(TMT6plex); C6(Carbamidomethyl); K12(TMT6plex)	CID	1	0	1	190600	94820	99490	188800	113500	120300	Unique	Used	10224	0	0.00124	1522	1692	4.15	0	1038000	2	812.445	1623.88	0	2.73	0.53	1588	1589	MS2	0/0	0	0	2ms21_2014_479_PFL_Fr1.mgf			190600	94820	99490	188800	113500
High	A	qDPPSVVVTSHQAPGEk	1969	Unambiguous	Zinc-alpha-2-glycoprotein OS=Homo sapiens GN=AZGP1 PE=1 SV=2 - [ZA2G_HUMAN]	1	1	P25311	N-Term(TMT6plex); K17(TMT6plex)	CID	1	0	1	7556	40400	35720	18510	25700	49340	Unique	Used	10225	0	0.00136	2962	2967	3.41	0	698200	3	745.414	2234.23	0	4.14	0.53	1590	1591	MS2	0/0	0	0	2ms21_2014_479_PFL_Fr1.mgf			7556	40400	35720	18510	25700
High	A	eQTMSEcEAGALR	2002	Unambiguous	cDNA FLJ78207, highly similar to Human complement protein component C7 mRNA OS=Homo sapiens PE=2 SV=1 - [A8K2T4_HUMAN]	3	1	A8K2T4	N-Term(TMT6plex); C7(Carbamidomethyl)	CID	1	0	1	161400	145900	102300	189500	101200	136000	Unique	Used	10234	0	0.000318	329	286	4.08	0	1305000	2	855.903	1710.8	0	-0.45	0.55	1610	1611	MS2	0/0	0	0	2ms21_2014_479_PFL_Fr1.mgf			161400	145900	102300	189500	101200
High	A	gVcEETSGAYEk	1665	Unambiguous	Protein AMBP OS=Homo sapiens GN=AMBP PE=1 SV=1 - [AMBP_HUMAN]	1	1	P02760	N-Term(TMT6plex); C3(Carbamidomethyl); K12(TMT6plex)	CID	1	0	1	651200	528700	539600	945600	381700	535300	Unique	Used	10253	0	0.000932	714	733	2.79	0	10770000	3	596.635	1787.89	0	0.31	0.55	1652	1653	MS2	0/0	0	0	2ms21_2014_479_PFL_Fr1.mgf			651200	528700	539600	945600	381700
High	A	gVcEETSGAYEk	1665	Unambiguous	Protein AMBP OS=Homo sapiens GN=AMBP PE=1 SV=1 - [AMBP_HUMAN]	1	1	P02760	N-Term(TMT6plex); C3(Carbamidomethyl); K12(TMT6plex)	CID	1	0	1	2104000	1445000	1642000	2736000	1178000	1804000	Unique	Used	10267	0	0.000547	713	726	3.36	0	13130000	2	894.448	1787.89	0	-0.23	0.55	1683	1684	MS2	0/0	0	0	2ms21_2014_479_PFL_Fr1.mgf			2104000	1445000	1642000	2736000	1178000
High	A	sTTPDITGYR	2179	Unambiguous	Putative uncharacterized protein DKFZp686O12165 (Fragment) OS=Homo sapiens GN=DKFZp686O12165 PE=1 SV=1 - [Q6MZM7_HUMAN]	3	1	Q6MZM7	N-Term(TMT6plex)	CID	1	0	1	52650	56680	35160	73490	47610	65970	Unique	Used	10281	0.002	0.0827	914	856	3.16	0	636300	2	670.359	1339.71	0	3.15	0.57	1714	1715	MS2	0/0	0	0	2ms21_2014_479_PFL_Fr1.mgf			52650	56680	35160	73490	47610
High	A	eGVMVQTSGk	2193	Unambiguous	Isoform 2 of Protein HEG homolog 1 OS=Homo sapiens GN=HEG1 - [HEG1_HUMAN]	2	1	Q9ULI3-2	N-Term(TMT6plex); K10(TMT6plex)	CID	1	0	1	42970	42930	50950	36330	46550	53710	Unique	Used	10285	0.002	0.0833	1770	1728	2.14	0	455500	3	498.618	1493.84	0	-1.1	0.57	1722	1723	MS2	0/0	0	0	2ms21_2014_479_PFL_Fr1.mgf			42970	42930	50950	36330	46550
High	A	eYTDASFTNR	2195	Unambiguous	cDNA FLJ76826, highly similar to Homo sapiens ceruloplasmin (ferroxidase) (CP), mRNA OS=Homo sapiens PE=2 SV=1 - [A8K5A4_HUMAN]	5	1	A8K5A4	N-Term(TMT6plex)	CID	1	0	1	118900	366000	205400	65100	283400	457800	Unique	Used	10286	0.001	0.0111	246	237	3.2	0	2442000	2	716.85	1432.69	0	1.26	0.57	1725	1726	MS2	0/0	0	0	2ms21_2014_479_PFL_Fr1.mgf			118900	366000	205400	65100	283400
High	A	aDAGTAVTFQcR	2204	Unambiguous		0	0		N-Term(TMT6plex); C11(Carbamidomethyl)	CID	1	0	1	9995	6400	11630	10370	7736	11230	No Proteins	Not Used	10288	0	0.000955	760	701	3.87	0	218100	3	509.259	1525.76	0	0.11	0.57	1729	1730	MS2	0/0	0	0	2ms21_2014_479_PFL_Fr1.mgf			9995	6400	11630	10370	7736
High	A	aDAGTAVTFQcR	2204	Unambiguous		0	0		N-Term(TMT6plex); C11(Carbamidomethyl)	CID	1	0	1	106100	59980	44600	122400	74920	71360	No Proteins	Not Used	10290	0.001	0.00775	838	790	4.05	0	708500	2	763.389	1525.77	0	5.28	0.57	1733	1734	MS2	0/0	0	0	2ms21_2014_479_PFL_Fr1.mgf			106100	59980	44600	122400	74920
High	A	aEDTAVYYcAR	2214	Unambiguous	Putative uncharacterized protein DKFZp686M08189 OS=Homo sapiens GN=DKFZp686M08189 PE=2 SV=1 - [Q6MZX9_HUMAN]	2	1	Q6MZX9	N-Term(TMT6plex); C9(Carbamidomethyl)	CID	1	0	1	141000	179400	189700	114500	278700	232300	Unique	Used	10291	0.001	0.00562	232	216	3.79	0	1912000	2	774.371	1547.73	0	-0.91	0.57	1736	1737	MS2	0/0	0	0	2ms21_2014_479_PFL_Fr1.mgf			141000	179400	189700	114500	278700
High	A	gcVQDEFcTR	2226	Unambiguous		0	0		N-Term(TMT6plex); C2(Carbamidomethyl); C8(Carbamidomethyl)	CID	1	0	1	84390	55090	75680	99010	63980	57800	No Proteins	Not Used	10294	0.001	0.0312	82	73	3.14	0	710700	2	750.84	1500.67	0	-3.68	0.57	1742	1743	MS2	0/0	0	0	2ms21_2014_479_PFL_Fr1.mgf			84390	55090	75680	99010	63980
High	A	gATTTFSAVER	2259	Unambiguous	Dermatopontin OS=Homo sapiens GN=DPT PE=2 SV=2 - [DERM_HUMAN]	1	1	Q07507	N-Term(TMT6plex)	CID	1	0	1	828700	536500	257600	1114000	378100	442100	Unique	Used	10301	0.001	0.00402	955	1002	4.03	0	5363000	2	684.87	1368.73	0	0.17	0.57	1758	1759	MS2	0/0	0	0	2ms21_2014_479_PFL_Fr1.mgf			828700	536500	257600	1114000	378100
High	A	aEDTAVYYcAR	2214	Unambiguous	Putative uncharacterized protein DKFZp686M08189 OS=Homo sapiens GN=DKFZp686M08189 PE=2 SV=1 - [Q6MZX9_HUMAN]	2	1	Q6MZX9	N-Term(TMT6plex); C9(Carbamidomethyl)	CID	1	0	1	25450	24320	35880	27500	43810	42190	Unique	Used	10303	0.001	0.0147	246	229	2.75	0	1240000	3	516.583	1547.74	0	-0.17	0.57	1762	1763	MS2	0/0	0	0	2ms21_2014_479_PFL_Fr1.mgf			25450	24320	35880	27500	43810
Middle	A	mAAVEk	2281	Unambiguous		0	0		N-Term(TMT6plex); K6(TMT6plex)	CID	1	0	1	147800	1621000	644500	127300	1118000	1169000	No Proteins	Not Used	10307	0.035	0.513	819	840	1.56	0	5937000	2	553.836	1106.67	0	1.03	0.57	1771	1772	MS2	0/0	0	0	2ms21_2014_479_PFL_Fr1.mgf			147800	1621000	644500	127300	1118000
High	A	iScESMGASk	2304	Unambiguous	Twisted gastrulation protein homolog 1 OS=Homo sapiens GN=TWSG1 PE=2 SV=1 - [TWSG1_HUMAN]	1	1	Q9GZX9	N-Term(TMT6plex); C3(Carbamidomethyl); K10(TMT6plex)	CID	1	0	1	189800	120300	90200	203100	109700	144800	Unique	Used	10312	0	0.00138	883	860	3.61	0	1062000	2	764.399	1527.79	0	-0.56	0.57	1782	1783	MS2	0/0	0	0	2ms21_2014_479_PFL_Fr1.mgf			189800	120300	90200	203100	109700
High	A	aSDTAMYYcAR	2312	Unambiguous		0	0		N-Term(TMT6plex); C9(Carbamidomethyl)	CID	1	0	1	9974	10600	9317	10060	14040	12270	No Proteins	Not Used	10314	0.001	0.0286	159	164	3.78	0	143500	2	769.36	1537.71	0.01	9.83	0.57	1786	1787	MS2	0/0	0	0	2ms21_2014_479_PFL_Fr1.mgf			9974	10600	9317	10060	14040
High	A	gATTTFSAVER	2259	Unambiguous	Dermatopontin OS=Homo sapiens GN=DPT PE=2 SV=2 - [DERM_HUMAN]	1	1	Q07507	N-Term(TMT6plex)	CID	1	0	1	64120	57140	24220	125200	46230	67870	Unique	Used	10315	0.001	0.00436	955	1002	4.14	0	1597000	2	684.87	1368.73	0	0.08	0.58	1788	1789	MS2	0/0	0	0	2ms21_2014_479_PFL_Fr1.mgf			64120	57140	24220	125200	46230
High	A	sVAIEVDGR	2320	Unambiguous		0	0		N-Term(TMT6plex)	CID	1	0	1	24510	11730	6470	20810	22630	12600	No Proteins	Not Used	10316	0.001	0.0175	1135	1180	2.81	0	520400	2	587.836	1174.66	0	1.07	0.58	1791	1792	MS2	0/0	0	0	2ms21_2014_479_PFL_Fr1.mgf			24510	11730	6470	20810	22630
High	A	vGFAEAAR	2323	Unambiguous	Cathepsin D OS=Homo sapiens GN=CTSD PE=1 SV=1 - [CATD_HUMAN]	1	1	P07339	N-Term(TMT6plex)	CID	1	0	1	171100	159600	525200	223200	174200	187000	Unique	Used	10317	0.003	0.113	901	941	2.38	0	2045000	2	525.301	1049.59	0	0.12	0.58	1793	1794	MS2	0/0	0	0	2ms21_2014_479_PFL_Fr1.mgf			171100	159600	525200	223200	174200
High	A	aEAQAQYSAAVAk	2348	Unambiguous	cDNA FLJ51742, highly similar to Inter-alpha-trypsin inhibitor heavy chain H4 OS=Homo sapiens PE=2 SV=1 - [B7Z544_HUMAN]	6	1	B7Z544	N-Term(TMT6plex); K13(TMT6plex)	CID	1	0	1	45650	193000	129200	50400	64550	173400	Unique	Used	10322	0	6.58e-05	2047	2023	5.51	0	931500	2	883.495	1765.98	0	-1.74	0.58	1804	1805	MS2	0/0	0	0	2ms21_2014_479_PFL_Fr1.mgf			45650	193000	129200	50400	64550
High	A	aLcASDVSk	2355	Unambiguous	Twisted gastrulation protein homolog 1 OS=Homo sapiens GN=TWSG1 PE=2 SV=1 - [TWSG1_HUMAN]	1	1	Q9GZX9	N-Term(TMT6plex); C3(Carbamidomethyl); K9(TMT6plex)	CID	1	0	1	24250	11940	13220	21640	12140	15120	Unique	Used	10324	0.001	0.0117	1535	1486	3.42	0	260100	2	704.898	1408.79	0	1.36	0.58	1808	1809	MS2	0/0	0	0	2ms21_2014_479_PFL_Fr1.mgf			24250	11940	13220	21640	12140
High	A	gGSADAAWk	2388	Unambiguous	Isoform 2 of Protein HEG homolog 1 OS=Homo sapiens GN=HEG1 - [HEG1_HUMAN]	2	1	Q9ULI3-2	N-Term(TMT6plex); K9(TMT6plex)	CID	1	0	1	64800	44920	38130	68590	48860	55770	Unique	Used	10332	0.001	0.0173	1409	1442	3.26	0	602100	2	660.87	1320.73	0	0.35	0.58	1826	1827	MS2	0/0	0	0	2ms21_2014_479_PFL_Fr1.mgf			64800	44920	38130	68590	48860
High	A	tTVYVVEDQR	2436	Unambiguous		0	0		N-Term(TMT6plex)	CID	1	0	1	10030	4438	9995	9737	11660	8972	No Proteins	Not Used	10345	0.005	0.133	1078	1097	2.18	0	150900	2	719.888	1438.77	0	-3.47	0.58	1854	1855	MS2	0/0	0	0	2ms21_2014_479_PFL_Fr1.mgf			10030	4438	9995	9737	11660
High	A	sVSVAAGESATLR	2466	Unambiguous		0	0		N-Term(TMT6plex)	CID	1	0	1	615000	438300	436000	683500	417200	460400	No Proteins	Not Used	10351	0	0.00128	1758	1863	4.06	0	4714000	2	738.915	1476.82	0	0.29	0.58	1868	1869	MS2	0/0	0	0	2ms21_2014_479_PFL_Fr1.mgf			615000	438300	436000	683500	417200
High	A	eDScQLGYSAGPcmGMTSR	2470	Unambiguous	Protein AMBP OS=Homo sapiens GN=AMBP PE=1 SV=1 - [AMBP_HUMAN]	1	1	P02760	N-Term(TMT6plex); C4(Carbamidomethyl); C13(Carbamidomethyl); M14(Oxidation)	CID	1	0	1							No Quan Values	Not Used		0	3.87e-06	46	39	4.87	0	1067000	3	784.67	2352	0	1.07	0.58	1870	1871	MS2	0/0	0	0	2ms21_2014_479_PFL_Fr1.mgf
High	A	sVSVAAGESATLR	2466	Unambiguous		0	0		N-Term(TMT6plex)	CID	1	0	1	32190	21060	33740	48960	33080	28140	No Proteins	Not Used	10354	0	0.000156	1703	1822	3.99	0	1197000	3	492.945	1476.82	0	-1.16	0.58	1874	1875	MS2	0/0	0	0	2ms21_2014_479_PFL_Fr1.mgf			32190	21060	33740	48960	33080
High	A	aSGSLcGAcTEDGTFR	2478	Unambiguous		0	0		N-Term(TMT6plex); C6(Carbamidomethyl); C9(Carbamidomethyl)	CID	1	0	1	45490	39200	33260	39010	46400	51060	No Proteins	Not Used	10355	0	0.000493	143	127	4.69	0	424400	2	959.431	1917.85	0	-4.57	0.58	1876	1877	MS2	0/0	0	0	2ms21_2014_479_PFL_Fr1.mgf			45490	39200	33260	39010	46400
High	A	eDScQLGYSAGPcmGMTSR	2470	Unambiguous	Protein AMBP OS=Homo sapiens GN=AMBP PE=1 SV=1 - [AMBP_HUMAN]	1	1	P02760	N-Term(TMT6plex); C4(Carbamidomethyl); C13(Carbamidomethyl); M14(Oxidation)	CID	0.0234	0	1	186700	95240	52690	210300	130600	125900	Unique	Used	10358	0.001	0.0191	62	55	2.56	0	2194000	2	1176.51	2352.01	0.01	5.92	0.58	1883	1884	MS2	0/0	0	0	2ms21_2014_479_PFL_Fr1.mgf			186700	95240	52690	210300	130600
High	A	aAFTEccQAADk	2503	Unambiguous	Albumin (Fragment) OS=Homo sapiens PE=2 SV=1 - [F6KPG5_HUMAN]	6	1	F6KPG5	N-Term(TMT6plex); C6(Carbamidomethyl); C7(Carbamidomethyl); K12(TMT6plex)	CID	1	0	1	24390	59100	45180	10190	48930	48470	Unique	Used	10361	0	0.00201	712	648	2.7	0	789100	3	610.636	1829.89	0	0.59	0.6	1890	1891	MS2	0/0	0	0	2ms21_2014_479_PFL_Fr1.mgf			24390	59100	45180	10190	48930
High	A	aAFTEccQAADk	2503	Unambiguous	Albumin (Fragment) OS=Homo sapiens PE=2 SV=1 - [F6KPG5_HUMAN]	6	1	F6KPG5	N-Term(TMT6plex); C6(Carbamidomethyl); C7(Carbamidomethyl); K12(TMT6plex)	CID	1	0	1	43410	915800	521900	32350	815700	568500	Unique	Used	10363	0	0.00101	705	642	3.38	0	3750000	2	915.45	1829.89	0	0.1	0.6	1894	1895	MS2	0/0	0	0	2ms21_2014_479_PFL_Fr1.mgf			43410	915800	521900	32350	815700
High	A	vDNALQSGNSQESVTEQDSk	2515	Unambiguous	Epididymis luminal protein 213 OS=Homo sapiens GN=HEL-213 PE=2 SV=1 - [V9HW34_HUMAN]	15	1	V9HW34	N-Term(TMT6plex); K20(TMT6plex)	CID	1	0	1	283500	211400	262400	190900	241900	293800	Unique	Used	10364	0	0.000322	1873	1866	4.7	0	2260000	2	1297.65	2594.3	0	1.81	0.6	1896	1897	MS2	0/0	0	0	2ms21_2014_479_PFL_Fr1.mgf			283500	211400	262400	190900	241900
Middle	A	aAAAAAAAAKNGSSGk	2529	Unambiguous		0	0		N-Term(TMT6plex); K16(TMT6plex)	CID	1	0	1	6861	6782	8235	10310	7110	10510	No Proteins	Not Used	10367	0.029	0.469	2634	2698	3.65	1	434100	2	888.009	1775.01	0	-3.94	0.6	1903	1904	MS2	0/0	0	0	2ms21_2014_479_PFL_Fr1.mgf			6861	6782	8235	10310	7110
High	A	eTYGEMADccAk	1233	Unambiguous	Albumin (Fragment) OS=Homo sapiens PE=2 SV=1 - [F6KPG5_HUMAN]	6	1	F6KPG5	N-Term(TMT6plex); C9(Carbamidomethyl); C10(Carbamidomethyl); K12(TMT6plex)	CID	1	0	1							No Quan Values	Not Used		0.001	0.005	219	189	3.82	0	80580	3	631.626	1892.86	0	2.61	0.6	1905	1906	MS2	0/0	0	0	2ms21_2014_479_PFL_Fr1.mgf
High	A	eTYGEMADccAk	1233	Unambiguous	Albumin (Fragment) OS=Homo sapiens PE=2 SV=1 - [F6KPG5_HUMAN]	6	1	F6KPG5	N-Term(TMT6plex); C9(Carbamidomethyl); C10(Carbamidomethyl); K12(TMT6plex)	CID	1	0	1	245400	226400	104500	269500	126100	154200	Unique	Used	10373	0	0.00139	215	182	4.46	0	1530000	2	946.935	1892.86	0	2.11	0.6	1916	1917	MS2	0/0	0	0	2ms21_2014_479_PFL_Fr1.mgf			245400	226400	104500	269500	126100
High	A	aAFTEccQAADk	2503	Unambiguous	Albumin (Fragment) OS=Homo sapiens PE=2 SV=1 - [F6KPG5_HUMAN]	6	1	F6KPG5	N-Term(TMT6plex); C6(Carbamidomethyl); C7(Carbamidomethyl); K12(TMT6plex)	CID	1	0	1	51990	1746000	1057000	71370	1687000	1214000	Unique	Used	10375	0	0.000563	699	637	3.39	0	7452000	2	915.45	1829.89	0	0.5	0.6	1920	1921	MS2	0/0	0	0	2ms21_2014_479_PFL_Fr1.mgf			51990	1746000	1057000	71370	1687000
High	A	aPEGFAVR	2575	Unambiguous	Complement C1r subcomponent-like protein OS=Homo sapiens GN=C1RL PE=1 SV=2 - [C1RL_HUMAN]	6	1	Q9NZP8	N-Term(TMT6plex)	CID	1	0	1	104900	79030	77940	120900	76670	94890	Unique	Used	10378	0.002	0.0509	1081	1075	1.85	0	830400	2	538.307	1075.61	0	-2.29	0.6	1927	1928	MS2	0/0	0	0	2ms21_2014_479_PFL_Fr1.mgf			104900	79030	77940	120900	76670
High	A	dSGPYScSVNVQDk	2595	Unambiguous	Endothelial cell-selective adhesion molecule OS=Homo sapiens GN=ESAM PE=4 SV=1 - [F8WDW9_HUMAN]	2	1	F8WDW9	N-Term(TMT6plex); C7(Carbamidomethyl); K14(TMT6plex)	CID	1	0	1				3829			No Quan Values	Not Used	10383	0	0.000277	1042	989	3.75	0	165000	3	672.004	2014	0	1.78	0.6	1938	1939	MS2	0/0	0	0	2ms21_2014_479_PFL_Fr1.mgf						3829
High	A	gVcEETSGAYEk	1665	Unambiguous	Protein AMBP OS=Homo sapiens GN=AMBP PE=1 SV=1 - [AMBP_HUMAN]	1	1	P02760	N-Term(TMT6plex); C3(Carbamidomethyl); K12(TMT6plex)	CID	1	0	1	10750	13340		17810		10430	Unique	Used	10384	0	0.000338	714	733	3.11	0	10770000	3	596.635	1787.89	0	0.31	0.6	1941	1942	MS2	0/0	0	0	2ms21_2014_479_PFL_Fr1.mgf			10750	13340		17810
High	A	dVSLAk	2605	Unambiguous	Polymeric immunoglobulin receptor OS=Homo sapiens GN=PIGR PE=1 SV=4 - [PIGR_HUMAN]	1	1	P01833	N-Term(TMT6plex); K6(TMT6plex)	CID	1	0	1	285600	255300	271900	328200	239700	253000	Unique	Used	10386	0.003	0.112	809	778	2.19	0	1904000	2	545.847	1090.69	0	-0.86	0.6	1945	1946	MS2	0/0	0	0	2ms21_2014_479_PFL_Fr1.mgf			285600	255300	271900	328200	239700
High	A	aATGEcTATVGk	1048	Unambiguous	cDNA FLJ53075, highly similar to Kininogen-1 OS=Homo sapiens PE=2 SV=1 - [B4DPP8_HUMAN]	6	1	B4DPP8	N-Term(TMT6plex); C6(Carbamidomethyl); K12(TMT6plex)	CID	1	0	1	10650	8766	9017	11780	7761	7893	Unique	Used	10390	0	0.00139	1505	1665	3.92	0	199300	2	812.442	1623.88	0	-0.27	0.6	1954	1955	MS2	0/0	0	0	2ms21_2014_479_PFL_Fr1.mgf			10650	8766	9017	11780	7761
High	A	dIQmTQSPSSLSASVGDR	2626	Unambiguous	Ig kappa chain V-I region Scw OS=Homo sapiens PE=1 SV=1 - [KV117_HUMAN]	1	1	P01609	N-Term(TMT6plex); M4(Oxidation)	CID	0.0268	0	1							No Quan Values	Not Used	10393	0	2.51e-06	1028	1003	4.48	0	511500	3	708.686	2124.04	0	-0.78	0.6	1960	1961	MS2	0/0	0	0	2ms21_2014_479_PFL_Fr1.mgf
High	A	dIQmTQSPSSLSASVGDR	2626	Unambiguous	Ig kappa chain V-I region Scw OS=Homo sapiens PE=1 SV=1 - [KV117_HUMAN]	1	1	P01609	N-Term(TMT6plex); M4(Oxidation)	CID	1	0	1	499600	259000	421100	279800	305300	408600	Unique	Used	10398	0	0.000232	1147	1112	4.64	0	5180000	2	1062.53	2124.05	0	1.78	0.6	1971	1972	MS2	0/0	0	0	2ms21_2014_479_PFL_Fr1.mgf			499600	259000	421100	279800	305300
High	A	iSHELDSASSEVN	2648	Unambiguous	Isoform D of Osteopontin OS=Homo sapiens GN=SPP1 - [OSTP_HUMAN]	6	1	P10451-4	N-Term(TMT6plex)	CID	1	0	1	243700	105100	224900	350700	95390	141700	Unique	Used	10399	0	0.00235	438	430	3.32	0	5597000	2	808.902	1616.8	0	0.3	0.6	1974	1975	MS2	0/0	0	0	2ms21_2014_479_PFL_Fr1.mgf			243700	105100	224900	350700	95390
High	A	amVGSDVELScAcPEGSR	2670	Unambiguous	ICOS ligand OS=Homo sapiens GN=ICOSLG PE=1 SV=2 - [ICOSL_HUMAN]	3	1	O75144	N-Term(TMT6plex); M2(Oxidation); C11(Carbamidomethyl); C13(Carbamidomethyl)	CID	1	0	1	140300	94440	88270	168800	107800	85200	Unique	Used	10403	0	1.31e-05	236	233	3.65	0	1647000	2	1085.5	2169.98	0	2.42	0.6	1982	1983	MS2	0/0	0	0	2ms21_2014_479_PFL_Fr1.mgf			140300	94440	88270	168800	107800
High	A	sTEYGEGYAcDTDLR	2680	Unambiguous	cDNA FLJ38724 fis, clone KIDNE2010151, highly similar to UROMODULIN OS=Homo sapiens PE=2 SV=1 - [B3KTU0_HUMAN]	6	1	B3KTU0	N-Term(TMT6plex); C10(Carbamidomethyl)	CID	1	0	1	46740	47640	32310	34070	67800	55580	Unique	Used	10405	0	0.000142	114	113	3.88	0	1125000	3	655.961	1965.87	0	-0.97	0.62	1987	1988	MS2	0/0	0	0	2ms21_2014_479_PFL_Fr1.mgf			46740	47640	32310	34070	67800
Middle	A	vLNQELR	2682	Unambiguous	Apolipoprotein D OS=Homo sapiens GN=APOD PE=1 SV=1 - [APOD_HUMAN]	2	1	P05090	N-Term(TMT6plex)	CID	1	0	1	462800	420000	359100	862900	371000	674200	Unique	Used	10406	0.022	0.402	714	728	1.96	0	4355000	2	550.834	1100.66	0	-1.37	0.62	1989	1990	MS2	0/0	0	0	2ms21_2014_479_PFL_Fr1.mgf			462800	420000	359100	862900	371000
High	A	sTEYGEGYAcDTDLR	2680	Unambiguous	cDNA FLJ38724 fis, clone KIDNE2010151, highly similar to UROMODULIN OS=Homo sapiens PE=2 SV=1 - [B3KTU0_HUMAN]	6	1	B3KTU0	N-Term(TMT6plex); C10(Carbamidomethyl)	CID	1	0	1	586000	679700	101100	787000	1020000	482600	Unique	Used	10408	0	3.4e-05	111	110	5.11	0	5783000	2	983.437	1965.87	0	-1.93	0.62	1993	1994	MS2	0/0	0	0	2ms21_2014_479_PFL_Fr1.mgf			586000	679700	101100	787000	1020000
High	A	vGGTGmFTVR	2691	Unambiguous	cDNA FLJ38724 fis, clone KIDNE2010151, highly similar to UROMODULIN OS=Homo sapiens PE=2 SV=1 - [B3KTU0_HUMAN]	8	1	B3KTU0	N-Term(TMT6plex); M6(Oxidation)	CID	1	0	1	3611000	4423000	671100	4241000	8389000	2491000	Unique	Used	10409	0.002	0.0359	742	791	1.47	0	43210000	2	635.345	1269.68	0	0.16	0.62	1996	1997	MS2	0/0	0	0	2ms21_2014_479_PFL_Fr1.mgf			3611000	4423000	671100	4241000	8389000
High	A	gSISIQTEEk	2695	Unambiguous	cDNA FLJ78262, highly similar to Homo sapiens semenogelin II (SEMG2), mRNA OS=Homo sapiens PE=2 SV=1 - [A8K6Z6_HUMAN]	4	1	A8K6Z6	N-Term(TMT6plex); K10(TMT6plex)	CID	1	0	1	2426000	16270000	5254000	1133000	1182000		Unique	Used	10410	0.001	0.00552	1920	1995	2.58	0	31480000	2	775.445	1549.88	0	-0.22	0.62	1998	1999	MS2	0/0	0	0	2ms21_2014_479_PFL_Fr1.mgf			2426000	16270000	5254000	1133000	1182000
High	A	amVGSDVELScAcPEGSR	2670	Unambiguous	ICOS ligand OS=Homo sapiens GN=ICOSLG PE=1 SV=2 - [ICOSL_HUMAN]	3	1	O75144	N-Term(TMT6plex); M2(Oxidation); C11(Carbamidomethyl); C13(Carbamidomethyl)	CID	1	0	1	3321			3807			Unique	Used	10411	0	4.27e-05	189	203	4.56	0	80700	3	723.997	2169.98	0	-1.25	0.62	2000	2001	MS2	0/0	0	0	2ms21_2014_479_PFL_Fr1.mgf			3321			3807
High	A	mTVTDQVNcPk	1443	Unambiguous	Apolipoprotein D OS=Homo sapiens GN=APOD PE=1 SV=1 - [APOD_HUMAN]	2	1	P05090	N-Term(TMT6plex); C9(Carbamidomethyl); K11(TMT6plex)	CID	1	0	1	1161000	789100	744300	1944000	666900	1272000	Unique	Used	10412	0	0.000346	1686	1638	4.13	0	9086000	2	875.965	1750.92	0	-0.35	0.62	2002	2003	MS2	0/0	0	0	2ms21_2014_479_PFL_Fr1.mgf			1161000	789100	744300	1944000	666900
High	A	sTEYGEGYAcDTDLR	2680	Unambiguous	cDNA FLJ38724 fis, clone KIDNE2010151, highly similar to UROMODULIN OS=Homo sapiens PE=2 SV=1 - [B3KTU0_HUMAN]	6	1	B3KTU0	N-Term(TMT6plex); C10(Carbamidomethyl)	CID	1	0	1	2429000	2848000	601100	3472000	4890000	1961000	Unique	Used	10416	0	0.000108	113	110	4	0	23170000	2	983.438	1965.87	0	-0.07	0.62	2011	2012	MS2	0/0	0	0	2ms21_2014_479_PFL_Fr1.mgf			2429000	2848000	601100	3472000	4890000
Middle	A	vIDAVR	2734	Unconsidered		0	0		N-Term(TMT6plex)	CID	1	0	1	85860	400200	176500	94780	195200	184800	No Proteins	Not Used	10420	0.013	0.255	456	486	1.76	0	1687000	2	451.287	901.566	0	-1.07	0.62	2020	2021	MS2	0/0	0	0	2ms21_2014_479_PFL_Fr1.mgf			85860	400200	176500	94780	195200
Middle	A	vLDAVR	2734	Unconsidered		0	0		N-Term(TMT6plex)	CID	1	0	1	85860	400200	176500	94780	195200	184800	No Proteins	Not Used	10420	0.013	0.255	456	486	1.76	0	1687000	2	451.287	901.566	0	-1.07	0.62	2020	2021	MS2	0/0	0	0	2ms21_2014_479_PFL_Fr1.mgf			85860	400200	176500	94780	195200
High	A	vVITYSSR	2739	Unambiguous		0	0		N-Term(TMT6plex)	CID	1	0	1	88230	57920	36810	44010	57780	56240	No Proteins	Not Used	10421	0.001	0.0225	864	893	2.55	0	597300	2	577.344	1153.68	0	2.05	0.62	2022	2023	MS2	0/0	0	0	2ms21_2014_479_PFL_Fr1.mgf			88230	57920	36810	44010	57780
Middle	A	dSLEFR	2776	Unambiguous	Alpha-1-antichymotrypsin OS=Homo sapiens GN=SERPINA3 PE=1 SV=2 - [AACT_HUMAN]	3	1	P01011	N-Term(TMT6plex)	CID	1	0	1	151000	360900	327500	142400	175200	378000	Unique	Used	10430	0.033	0.497	495	504	1.71	0	2551000	2	498.272	995.537	0	1.02	0.62	2042	2043	MS2	0/0	0	0	2ms21_2014_479_PFL_Fr1.mgf			151000	360900	327500	142400	175200
High	A	sEAAcLAAGPGIR	2781	Unambiguous	cDNA FLJ58441, highly similar to Attractin OS=Homo sapiens PE=2 SV=1 - [B4DZ36_HUMAN]	4	1	B4DZ36	N-Term(TMT6plex); C5(Carbamidomethyl)	CID	1	0	1	111800	91820	76000	129900	129600	110400	Unique	Used	10431	0.001	0.011	939	936	3.97	0	970700	2	751.4	1501.79	0	-4.08	0.62	2044	2045	MS2	0/0	0	0	2ms21_2014_479_PFL_Fr1.mgf			111800	91820	76000	129900	129600
High	A	gSISIQTEEk	2695	Unambiguous	cDNA FLJ78262, highly similar to Homo sapiens semenogelin II (SEMG2), mRNA OS=Homo sapiens PE=2 SV=1 - [A8K6Z6_HUMAN]	4	1	A8K6Z6	N-Term(TMT6plex); K10(TMT6plex)	CID	1	0	1	99020	431600	150800	76050	52310	42180	Unique	Used	10433	0	0.0028	1938	2015	2.78	0	1180000	2	775.445	1549.88	0	-1	0.62	2048	2049	MS2	0/0	0	0	2ms21_2014_479_PFL_Fr1.mgf			99020	431600	150800	76050	52310
Middle	A	iRPLVTQ	2804	Unambiguous		0	0		N-Term(TMT6plex)	CID	1	0	1	64770	45070	35540	61000	44500	63300	No Proteins	Not Used	10437	0.012	0.22	232	241	0.95	0	454100	2	528.342	1055.68	0	-0.76	0.62	2057	2058	MS2	0/0	0	0	2ms21_2014_479_PFL_Fr1.mgf			64770	45070	35540	61000	44500
High	A	gVcEETSGAYEk	1665	Unambiguous	Protein AMBP OS=Homo sapiens GN=AMBP PE=1 SV=1 - [AMBP_HUMAN]	1	1	P02760	N-Term(TMT6plex); C3(Carbamidomethyl); K12(TMT6plex)	CID	1	0	1	613000	463300	471000	761800	330300	448000	Unique	Used	10442	0	0.000179	714	733	3.84	0	135300000	2	894.448	1787.89	0	0.25	0.62	2069	2070	MS2	0/0	0	0	2ms21_2014_479_PFL_Fr1.mgf			613000	463300	471000	761800	330300
High	A	dVQMTQSPSSLSASVGDR	2860	Unambiguous		0	0		N-Term(TMT6plex)	CID	1	0	1							No Proteins	Not Used	10451	0.001	0.0142	1151	1194	2.98	0	57160	3	698.685	2094.04	0	3.38	0.63	2088	2089	MS2	0/0	0	0	2ms21_2014_479_PFL_Fr1.mgf
High	A	qVEGmEDWk	2870	Unambiguous	Zinc-alpha-2-glycoprotein OS=Homo sapiens GN=AZGP1 PE=1 SV=2 - [ZA2G_HUMAN]	1	1	P25311	N-Term(TMT6plex); M5(Oxidation); K9(TMT6plex)	CID	1	0	1	67610	64780	50530	85110	71420	80540	Unique	Used	10454	0.001	0.00463	863	823	2.78	0	943000	3	532.609	1595.81	0	-1.09	0.63	2095	2096	MS2	0/0	0	0	2ms21_2014_479_PFL_Fr1.mgf			67610	64780	50530	85110	71420
High	A	sVAIEVDGR	2320	Unambiguous		0	0		N-Term(TMT6plex)	CID	1	0	1	248400	99160	36190	193000	152100	107700	No Proteins	Not Used	10455	0.001	0.015	1135	1180	2.96	0	1316000	2	587.835	1174.66	0	-0.49	0.63	2097	2098	MS2	0/0	0	0	2ms21_2014_479_PFL_Fr1.mgf			248400	99160	36190	193000	152100
Middle	A	mATLYSR	2876	Unambiguous	Prostaglandin-H2 D-isomerase OS=Homo sapiens GN=PTGDS PE=1 SV=1 - [PTGDS_HUMAN]	3	1	P41222	N-Term(TMT6plex)	CID	1	0	1	580800	446200	380000	568900	370200	634400	Unique	Used	10456	0.035	0.528	440	440	1.94	0	4563000	2	535.798	1070.59	0	1.12	0.63	2099	2100	MS2	0/0	0	0	2ms21_2014_479_PFL_Fr1.mgf			580800	446200	380000	568900	370200
High	A	qVEGmEDWk	2870	Unambiguous	Zinc-alpha-2-glycoprotein OS=Homo sapiens GN=AZGP1 PE=1 SV=2 - [ZA2G_HUMAN]	1	1	P25311	N-Term(TMT6plex); M5(Oxidation); K9(TMT6plex)	CID	1	0	1	916800	2795000	2347000	2206000	2139000	3388000	Unique	Used	10457	0.001	0.00796	896	877	2.39	0	19040000	2	798.411	1595.81	0	0.29	0.63	2102	2103	MS2	0/0	0	0	2ms21_2014_479_PFL_Fr1.mgf			916800	2795000	2347000	2206000	2139000
High	A	vTITcQASQDIR	2896	Unambiguous	Ig kappa chain V-I region Scw OS=Homo sapiens PE=1 SV=1 - [KV117_HUMAN]	1	1	P01609	N-Term(TMT6plex); C5(Carbamidomethyl)	CID	1	0	1	1294000	971700	1322000	329100	838600	1349000	Unique	Used	10462	0	0.00132	1380	1355	3.82	0	9283000	2	810.932	1620.86	0	-0.39	0.63	2113	2114	MS2	0/0	0	0	2ms21_2014_479_PFL_Fr1.mgf			1294000	971700	1322000	329100	838600
High	A	bIZMTQSPSSLSASVGDR	2627	Unambiguous		0	0		N-Term(TMT6plex)	CID	0.0226	0	1	31960	51370		37730	22660	34540	No Proteins	Not Used	10463	0	0.000926	1205	1259	2.65	0	3091000	3	703.355	2108.05	0	0.82	0.63	2115	2116	MS2	0/0	0	0	2ms21_2014_479_PFL_Fr1.mgf			31960	51370		37730	22660
High	A	aALSMck	1299	Unambiguous	Prostaglandin-H2 D-isomerase OS=Homo sapiens GN=PTGDS PE=1 SV=1 - [PTGDS_HUMAN]	4	1	P41222	N-Term(TMT6plex); C6(Carbamidomethyl); K7(TMT6plex)	CID	1	0	1	5489000	3834000	3290000	5961000	2202000	4247000	Unique	Used	10464	0.002	0.0784	1129	1145	2.85	0	30010000	2	619.854	1238.7	0	0.16	0.63	2117	2118	MS2	0/0	0	0	2ms21_2014_479_PFL_Fr1.mgf			5489000	3834000	3290000	5961000	2202000
High	A	aGAAAGGPGVSGVcVck	2913	Unambiguous		0	0		N-Term(TMT6plex); C14(Carbamidomethyl); C16(Carbamidomethyl); K17(TMT6plex)	CID	1	0	1	7689		7307	16240			No Proteins	Not Used	10466	0	0.000294	1945	1969	3.72	0	216000	3	659.354	1976.05	0	1.08	0.63	2121	2122	MS2	0/0	0	0	2ms21_2014_479_PFL_Fr1.mgf			7689		7307	16240
High	A	vTITcQASQDIR	2896	Unambiguous	Ig kappa chain V-I region Scw OS=Homo sapiens PE=1 SV=1 - [KV117_HUMAN]	1	1	P01609	N-Term(TMT6plex); C5(Carbamidomethyl)	CID	1	0	1	275300	178600	217500	208800	196400	290000	Unique	Used	10467	0	0.00127	1331	1316	3.67	0	5244000	3	540.957	1620.86	0	-0.85	0.63	2124	2125	MS2	0/0	0	0	2ms21_2014_479_PFL_Fr1.mgf			275300	178600	217500	208800	196400
High	A	aDGEScSASMMYQEGk	1658	Unambiguous	Antithrombin-III OS=Homo sapiens GN=SERPINC1 PE=1 SV=1 - [ANT3_HUMAN]	1	1	P01008	N-Term(TMT6plex); C6(Carbamidomethyl); K16(TMT6plex)	CID	1	0	1		4422					No Quan Values	Not Used	10468	0.001	0.00515	251	241	2.41	0	155700	3	737.005	2209	0	1.11	0.63	2126	2127	MS2	0/0	0	0	2ms21_2014_479_PFL_Fr1.mgf				4422
High	A	qVFGEATk	2921	Unambiguous	Cathepsin D OS=Homo sapiens GN=CTSD PE=1 SV=1 - [CATD_HUMAN]	1	1	P07339	N-Term(TMT6plex); K8(TMT6plex)	CID	1	0	1	47580	36610	66210	48050	34350	38540	Unique	Used	10469	0.002	0.0877	1311	1307	2.75	0	494700	2	669.395	1337.78	0	0.4	0.63	2128	2129	MS2	0/0	0	0	2ms21_2014_479_PFL_Fr1.mgf			47580	36610	66210	48050	34350
High	A	aALSMck	1299	Unambiguous	Prostaglandin-H2 D-isomerase OS=Homo sapiens GN=PTGDS PE=1 SV=1 - [PTGDS_HUMAN]	4	1	P41222	N-Term(TMT6plex); C6(Carbamidomethyl); K7(TMT6plex)	CID	1	0	1	2262000	1681000	1609000	2756000	1094000	2068000	Unique	Used	10472	0.002	0.0357	1129	1145	2.25	0	15090000	2	619.854	1238.7	0	0.06	0.63	2135	2136	MS2	0/0	0	0	2ms21_2014_479_PFL_Fr1.mgf			2262000	1681000	1609000	2756000	1094000
High	A	yIcENQDSISSk	2954	Unambiguous	Albumin (Fragment) OS=Homo sapiens PE=2 SV=1 - [F6KPG5_HUMAN]	6	1	F6KPG5	N-Term(TMT6plex); C3(Carbamidomethyl); K12(TMT6plex)	CID	1	0	1	153700	530900	325500	169300	412900	346100	Unique	Used	10477	0	0.000297	1181	1161	4.19	0	2651000	2	951.487	1901.97	0	-1.15	0.63	2146	2147	MS2	0/0	0	0	2ms21_2014_479_PFL_Fr1.mgf			153700	530900	325500	169300	412900
High	A	aGLQVYNk	2976	Unambiguous	CD59 glycoprotein OS=Homo sapiens GN=CD59 PE=1 SV=1 - [E9PNW4_HUMAN]	3	1	E9PNW4	N-Term(TMT6plex); K8(TMT6plex)	CID	1	0	1	4511000	3014000	2729000	5555000	2382000	3344000	Unique	Used	10482	0.001	0.028	1316	1320	3.61	0	27230000	2	675.911	1350.81	0	-0.42	0.63	2157	2158	MS2	0/0	0	0	2ms21_2014_479_PFL_Fr1.mgf			4511000	3014000	2729000	5555000	2382000
Middle	A	dIQmTQSPSSLPASVGDR	3004	Unambiguous		0	0		N-Term(TMT6plex); M4(Oxidation)	CID	1	0	1	96410	125200	28100	135200	153300	79480	No Proteins	Not Used	10489	0.026	0.422	1196	1174	1.19	0	2250000	3	712.027	2134.07	0	0.46	0.63	2172	2173	MS2	0/0	0	0	2ms21_2014_479_PFL_Fr1.mgf			96410	125200	28100	135200	153300
High	A	cVVTGEDGSESEATVNVk	3016	Unambiguous		0	0		N-Term(TMT6plex); C1(Carbamidomethyl); K18(TMT6plex)	CID	1	0	1	32110	23630	26680	38900	9802	21660	No Proteins	Not Used	10491	0	0.00197	1952	1914	2.95	0	513800	3	780.398	2339.18	0	-0.22	0.63	2176	2177	MS2	0/0	0	0	2ms21_2014_479_PFL_Fr1.mgf			32110	23630	26680	38900	9802
High	A	cVVTGEDGSESEATVNVk	3016	Unambiguous		0	0		N-Term(TMT6plex); C1(Carbamidomethyl); K18(TMT6plex)	CID	1	0	1	18400	17070	17400	25330	8781	17240	No Proteins	Not Used	10492	0	1.02e-06	1887	1854	6.84	0	452800	2	1170.09	2339.17	0	-2.59	0.63	2179	2180	MS2	0/0	0	0	2ms21_2014_479_PFL_Fr1.mgf			18400	17070	17400	25330	8781
High	A	lEGEAcGVYTPR	3022	Unambiguous		0	0		N-Term(TMT6plex); C6(Carbamidomethyl)	CID	1	0	1	126200	132200	222900	133300	109200	133700	No Proteins	Not Used	10493	0	0.00272	773	742	4.05	0	1440000	2	790.9	1580.79	0	-0.74	0.63	2181	2182	MS2	0/0	0	0	2ms21_2014_479_PFL_Fr1.mgf			126200	132200	222900	133300	109200
High	A	aGQcVcVEGFR	3033	Unambiguous	Isoform 3 of Tenascin-X OS=Homo sapiens GN=TNXB - [TENX_HUMAN]	3	1	P22105-3	N-Term(TMT6plex); C4(Carbamidomethyl); C6(Carbamidomethyl)	CID	1	0	1	435900	271000	253200	655400	221100	359100	Unique	Used	10496	0	0.00178	441	387	3.5	0	3257000	2	756.368	1511.73	0	-0.75	0.63	2187	2188	MS2	0/0	0	0	2ms21_2014_479_PFL_Fr1.mgf			435900	271000	253200	655400	221100
High	A	qEcSIPVcGQDQVTVAmTPR	3060	Unambiguous	Thrombin light chain (Fragment) OS=Homo sapiens GN=F2 PE=4 SV=1 - [C9JV37_HUMAN]	3	1	C9JV37	N-Term(TMT6plex); C3(Carbamidomethyl); C8(Carbamidomethyl); M17(Oxidation)	CID	1	0	1	12840	10200	23160	23290	28130	17740	Unique	Used	10502	0.001	0.00566	831	775	3.6	0	474400	3	841.071	2521.2	0	-2.96	0.65	2201	2202	MS2	0/0	0	0	2ms21_2014_479_PFL_Fr1.mgf			12840	10200	23160	23290	28130
High	A	gDSGEQVGQVAWAR	3066	Unambiguous		0	0		N-Term(TMT6plex)	CID	1	0	1	100200	53230	49830	70810	57560	73870	No Proteins	Not Used	10504	0	0.000239	725	757	3.93	0	903900	2	844.928	1688.85	0	-4.37	0.65	2205	2206	MS2	0/0	0	0	2ms21_2014_479_PFL_Fr1.mgf			100200	53230	49830	70810	57560
High	A	tEGDGVYTLNNEk	3069	Unambiguous	Haptoglobin OS=Homo sapiens GN=HP PE=1 SV=1 - [HPT_HUMAN]	3	1	P00738	N-Term(TMT6plex); K13(TMT6plex)	CID	1	0	1	29580	99760	56020	34190	22420	103100	Unique	Used	10505	0.001	0.00457	1643	1619	3.28	0	667500	2	949.5	1897.99	0	0.69	0.65	2207	2208	MS2	0/0	0	0	2ms21_2014_479_PFL_Fr1.mgf			29580	99760	56020	34190	22420
High	A	tWQDcEYk	3084	Unambiguous	cDNA FLJ53075, highly similar to Kininogen-1 OS=Homo sapiens PE=2 SV=1 - [B4DPP8_HUMAN]	6	1	B4DPP8	N-Term(TMT6plex); C5(Carbamidomethyl); K8(TMT6plex)	CID	1	0	1	1540000	838000	822500	1858000	1283000	1003000	Unique	Used	10509	0.001	0.0219	583	570	2.61	0	9030000	2	794.398	1587.79	0	0.22	0.65	2216	2217	MS2	0/0	0	0	2ms21_2014_479_PFL_Fr1.mgf			1540000	838000	822500	1858000	1283000
High	A	vEDTAVYYcAR	3093	Unambiguous		0	0		N-Term(TMT6plex); C9(Carbamidomethyl)	CID	1	0	1	592000	688600	434400	227900	533200	686000	No Proteins	Not Used	10511	0.001	0.0265	441	413	2.65	0	4961000	2	788.388	1575.77	0	1.17	0.65	2220	2221	MS2	0/0	0	0	2ms21_2014_479_PFL_Fr1.mgf			592000	688600	434400	227900	533200
High	A	gSLTVQcVYR	3101	Unambiguous		0	0		N-Term(TMT6plex); C7(Carbamidomethyl)	CID	1	0	1	96370	116800	66560	114000	53960	120500	No Proteins	Not Used	10513	0.001	0.00839	982	1004	3.02	0	1021000	2	706.381	1411.76	0	-1.05	0.65	2225	2226	MS2	0/0	0	0	2ms21_2014_479_PFL_Fr1.mgf			96370	116800	66560	114000	53960
Middle	A	aEWNETLEQIAGk	3112	Unambiguous		0	0		N-Term(TMT6plex); K13(TMT6plex)	CID	0.0139	0	1	1707000	4684000	6509000	4346000	683700	5147000	No Proteins	Not Used	10517	0.032	0.493	2387	2406	2.16	0	35440000	2	974.038	1947.07	0.01	5.29	0.65	2234	2235	MS2	0/0	0	0	2ms21_2014_479_PFL_Fr1.mgf			1707000	4684000	6509000	4346000	683700
High	A	dIQMTQSPSSVSASVGDR	3134	Unambiguous		0	0		N-Term(TMT6plex)	CID	1	0	1	421200	249600	405300	315000	329300	349000	No Proteins	Not Used	10523	0	3.63e-06	1115	1136	5.94	0	4117000	2	1047.52	2094.04	0	1.25	0.65	2247	2248	MS2	0/0	0	0	2ms21_2014_479_PFL_Fr1.mgf			421200	249600	405300	315000	329300
High	A	qAELTVQVk	3186	Unambiguous	cDNA FLJ36858 fis, clone ASTRO2015185, highly similar to POLIOVIRUS RECEPTOR OS=Homo sapiens PE=2 SV=1 - [B3KSS4_HUMAN]	6	1	B3KSS4	N-Term(TMT6plex); K9(TMT6plex)	CID	1	0	1	423300	350900	301700	487500	424500	330000	Unique	Used	10538	0.007	0.192	1648	1583	2.23	0	4934000	3	491.973	1473.9	0	0.31	0.65	2280	2281	MS2	0/0	0	0	2ms21_2014_479_PFL_Fr1.mgf			423300	350900	301700	487500	424500
High	A	fSGSNSGNTATLTISR	3190	Unambiguous	Uncharacterized protein OS=Homo sapiens PE=2 SV=1 - [Q6GMV8_HUMAN]	2	1	Q6GMV8	N-Term(TMT6plex)	CID	1	0	1	1225000	1037000	1716000	199200	1050000	1726000	Unique	Used	10540	0	8.54e-05	1498	1507	4.77	0	11700000	2	921.483	1841.96	0	1.83	0.65	2284	2285	MS2	0/0	0	0	2ms21_2014_479_PFL_Fr1.mgf			1225000	1037000	1716000	199200	1050000
High	A	fSGSNSGNTATLTISR	3190	Unambiguous	Uncharacterized protein OS=Homo sapiens PE=2 SV=1 - [Q6GMV8_HUMAN]	2	1	Q6GMV8	N-Term(TMT6plex)	CID	1	0	1	36690	62700	50980	15900	41390	63650	Unique	Used	10541	0	2.99e-05	1491	1501	2.97	0	1643000	3	614.658	1841.96	0	1.46	0.65	2286	2287	MS2	0/0	0	0	2ms21_2014_479_PFL_Fr1.mgf			36690	62700	50980	15900	41390
High	A	dIQmTQSPSSLSATVGDR	3198	Unambiguous		0	0		N-Term(TMT6plex); M4(Oxidation)	CID	1	0	1	61320	108400	80830	53540	74430	72970	No Proteins	Not Used	10542	0	5.52e-05	1239	1136	4.4	0	3472000	3	713.359	2138.06	0	0.58	0.65	2289	2290	MS2	0/0	0	0	2ms21_2014_479_PFL_Fr1.mgf			61320	108400	80830	53540	74430
High	A	mPYEcGPSLDVcAQDER	3200	Unambiguous	cDNA FLJ78207, highly similar to Human complement protein component C7 mRNA OS=Homo sapiens PE=2 SV=1 - [A8K2T4_HUMAN]	3	1	A8K2T4	M1(Oxidation); N-Term(TMT6plex); C5(Carbamidomethyl); C12(Carbamidomethyl)	CID	1	0	1	66390	78440	54770	74020	62020	77310	Unique	Used	10543	0	0.00108	106	93	2.93	0	1982000	2	1136.5	2271.99	0	0.67	0.65	2291	2292	MS2	0/0	0	0	2ms21_2014_479_PFL_Fr1.mgf			66390	78440	54770	74020	62020
High	A	cSGTIYAEEEGQETMk	3204	Unambiguous		0	0		N-Term(TMT6plex); C1(Carbamidomethyl); K16(TMT6plex)	CID	1	0	1	112300	106600	73720	205900	107700	111600	No Proteins	Not Used	10544	0	1.4e-05	797	774	5.8	0	1535000	2	1146.05	2291.1	0	1.24	0.65	2293	2294	MS2	0/0	0	0	2ms21_2014_479_PFL_Fr1.mgf			112300	106600	73720	205900	107700
High	A	eMEcAGTYDGSIDAck	3217	Unambiguous	Complement factor I light chain OS=Homo sapiens GN=CFI PE=3 SV=1 - [G3XAM2_HUMAN]	5	1	G3XAM2	N-Term(TMT6plex); C4(Carbamidomethyl); C15(Carbamidomethyl); K16(TMT6plex)	CID	1	0	1							No Quan Values	Not Used		0	1.13e-07	273	265	3.9	0	1327000	3	755.68	2265.02	0	0.45	0.65	2302	2303	MS2	0/0	0	0	2ms21_2014_479_PFL_Fr1.mgf
High	A	eMEcAGTYDGSIDAck	3217	Unambiguous	Complement factor I light chain OS=Homo sapiens GN=CFI PE=3 SV=1 - [G3XAM2_HUMAN]	5	1	G3XAM2	N-Term(TMT6plex); C4(Carbamidomethyl); C15(Carbamidomethyl); K16(TMT6plex)	CID	1	0	1	209000	264900	214500	205200	244800	213900	Unique	Used	10549	0	3.59e-05	286	291	5.71	0	2545000	2	1133.02	2265.03	0	2.31	0.65	2304	2305	MS2	0/0	0	0	2ms21_2014_479_PFL_Fr1.mgf			209000	264900	214500	205200	244800
Middle	A	dVTADFEGQSPk	3241	Unambiguous		0	0		N-Term(TMT6plex); K12(TMT6plex)	CID	1	0	1	34930	39000	27820	11700	28810	46840	No Proteins	Not Used	10553	0.014	0.286	1476	1427	1.81	0	449100	3	584.646	1751.92	0	1.01	0.67	2313	2314	MS2	0/0	0	0	2ms21_2014_479_PFL_Fr1.mgf			34930	39000	27820	11700	28810
High	A	gDVAFVk	3255	Unambiguous	Transferrin variant (Fragment) OS=Homo sapiens PE=2 SV=1 - [Q53H26_HUMAN]	6	1	Q53H26	N-Term(TMT6plex); K7(TMT6plex)	CID	1	0	1	1159000	24210000	9613000	850100	18370000	20020000	Unique	Used	10557	0.002	0.0808	1090	1070	3.06	0	90800000	2	597.368	1193.73	0	-0.05	0.67	2322	2323	MS2	0/0	0	0	2ms21_2014_479_PFL_Fr1.mgf			1159000	24210000	9613000	850100	18370000
High	A	qSEDSTFYLGER	3259	Unambiguous	cDNA FLJ76826, highly similar to Homo sapiens ceruloplasmin (ferroxidase) (CP), mRNA OS=Homo sapiens PE=2 SV=1 - [A8K5A4_HUMAN]	5	1	A8K5A4	N-Term(TMT6plex)	CID	1	0	1	324900	1202000	755500	114600	917800	1403000	Unique	Used	10558	0.001	0.0039	342	402	2.95	0	7587000	2	830.904	1660.8	0	-0.2	0.67	2324	2325	MS2	0/0	0	0	2ms21_2014_479_PFL_Fr1.mgf			324900	1202000	755500	114600	917800
High	A	lTVSIEAR	3264	Unambiguous	Carboxypeptidase N subunit 2 OS=Homo sapiens GN=CPN2 PE=1 SV=3 - [CPN2_HUMAN]	1	1	P22792	N-Term(TMT6plex)	CID	1	0	1	4184000	3704000	2012000	6051000	8445000	9724000	Unique	Used	10559	0.001	0.0132	1168	1189	1.83	0	50420000	2	559.342	1117.68	0	-0.42	0.67	2326	2327	MS2	0/0	0	0	2ms21_2014_479_PFL_Fr1.mgf			4184000	3704000	2012000	6051000	8445000
High	A	eDScQLGYSAGPcMGMTSR	2470	Unambiguous	Protein AMBP OS=Homo sapiens GN=AMBP PE=1 SV=1 - [AMBP_HUMAN]	1	1	P02760	N-Term(TMT6plex); C4(Carbamidomethyl); C13(Carbamidomethyl)	CID	1	0	1	439100	441500	243400	712400	315200	441800	Unique	Used	10562	0	1.85e-05	63	62	6.36	0	7273000	2	1168.51	2336	0	2.64	0.67	2333	2334	MS2	0/0	0	0	2ms21_2014_479_PFL_Fr1.mgf			439100	441500	243400	712400	315200
High	A	lcTVATLR	3279	Unambiguous	Albumin (Fragment) OS=Homo sapiens PE=2 SV=1 - [F6KPG5_HUMAN]	6	1	F6KPG5	N-Term(TMT6plex); C2(Carbamidomethyl)	CID	1	0	1	89080	426400	253300	85140	434200	323800	Unique	Used	10564	0.001	0.0297	1423	1431	1.82	0	1991000	2	581.845	1162.68	0	0.51	0.67	2337	2338	MS2	0/0	0	0	2ms21_2014_479_PFL_Fr1.mgf			89080	426400	253300	85140	434200
High	A	aMVGSDVELScAcPEGSR	2670	Unambiguous	ICOS ligand OS=Homo sapiens GN=ICOSLG PE=1 SV=2 - [ICOSL_HUMAN]	3	1	O75144	N-Term(TMT6plex); C11(Carbamidomethyl); C13(Carbamidomethyl)	CID	1	0	1		36150	49260		35240	57830	No Quan Values	Not Used	10565	0	0.000307	302	287	4.03	0	575400	3	718.666	2153.98	0	0.66	0.67	2339	2340	MS2	0/0	0	0	2ms21_2014_479_PFL_Fr1.mgf				36150	49260		35240
High	A	aMVGSDVELScAcPEGSR	2670	Unambiguous	ICOS ligand OS=Homo sapiens GN=ICOSLG PE=1 SV=2 - [ICOSL_HUMAN]	3	1	O75144	N-Term(TMT6plex); C11(Carbamidomethyl); C13(Carbamidomethyl)	CID	1	0	1	455200	259200	256100	561300	287900	244900	Unique	Used	10566	0	3.29e-06	290	272	5.78	0	3934000	2	1077.49	2153.98	0	-0.61	0.67	2341	2342	MS2	0/0	0	0	2ms21_2014_479_PFL_Fr1.mgf			455200	259200	256100	561300	287900
High	A	vYAcEVTHQGLSSPVTk	3315	Unambiguous	Protein IGKV3-11 OS=Homo sapiens GN=IGKV3-11 PE=4 SV=1 - [A0A087WZW8_HUMAN]|Epididymis luminal protein 213 OS=Homo sapiens GN=HEL-213 PE=2 SV=1 - [V9HW34_HUMAN]	16	2	A0A087WZW8;V9HW34	N-Term(TMT6plex); C4(Carbamidomethyl); K17(TMT6plex)	CID	1	0	1	858700	794600	496000	510000	487700	831800	Not Unique	Not Used	10572	0	5.05e-05	2632	2704	4.5	0	14470000	3	778.756	2334.25	0	0.7	0.67	2355	2356	MS2	0/0	0	0	2ms21_2014_479_PFL_Fr1.mgf			858700	794600	496000	510000	487700
Middle	A	dGMAPMVk	3326	Unambiguous		0	0		N-Term(TMT6plex); K8(TMT6plex)	CID	1	0	1	127800	80790	136200	138400	49820	76590	No Proteins	Not Used	10573	0.014	0.287	1477	1441	0.5	0	1059000	2	653.866	1306.72	0	-1.81	0.67	2357	2358	MS2	0/0	0	0	2ms21_2014_479_PFL_Fr1.mgf			127800	80790	136200	138400	49820
High	A	cPNPPVQENFDVNk	3333	Unambiguous	Apolipoprotein D OS=Homo sapiens GN=APOD PE=1 SV=1 - [APOD_HUMAN]	2	1	P05090	N-Term(TMT6plex); C1(Carbamidomethyl); K14(TMT6plex)	CID	1	0	1	290200	233700	185500	480000	138800	315200	Unique	Used	10575	0	0.000233	1876	1950	4.07	0	2744000	2	1058.55	2116.09	0	1.65	0.67	2361	2362	MS2	0/0	0	0	2ms21_2014_479_PFL_Fr1.mgf			290200	233700	185500	480000	138800
High	A	eNELTYYcck	3343	Unambiguous	CD59 glycoprotein OS=Homo sapiens GN=CD59 PE=1 SV=1 - [E9PNW4_HUMAN]	4	1	E9PNW4	N-Term(TMT6plex); C8(Carbamidomethyl); C9(Carbamidomethyl); K10(TMT6plex)	CID	1	0	1	24770	25700	17570	44580	24390		Unique	Used	10577	0.001	0.0287	559	506	1.92	0	418400	3	613.3	1837.89	0	-0.59	0.67	2366	2367	MS2	0/0	0	0	2ms21_2014_479_PFL_Fr1.mgf			24770	25700	17570	44580	24390
High	A	eNELTYYcck	3343	Unambiguous	CD59 glycoprotein OS=Homo sapiens GN=CD59 PE=1 SV=1 - [E9PNW4_HUMAN]	4	1	E9PNW4	N-Term(TMT6plex); C8(Carbamidomethyl); C9(Carbamidomethyl); K10(TMT6plex)	CID	1	0	1	1218000	843600	682400	1996000	847800	897900	Unique	Used	10578	0	0.00188	637	589	4.08	0	8244000	2	919.448	1837.89	0	1.67	0.67	2368	2369	MS2	0/0	0	0	2ms21_2014_479_PFL_Fr1.mgf			1218000	843600	682400	1996000	847800
High	A	eVQLVQSGAEVk	3353	Unambiguous		0	0		N-Term(TMT6plex); K12(TMT6plex)	CID	1	0	1	187100	186900	220400	148600	372400	283100	No Proteins	Not Used	10580	0	0.000205	2335	2309	4.96	0	1826000	2	873.013	1745.02	0	-1.09	0.67	2372	2373	MS2	0/0	0	0	2ms21_2014_479_PFL_Fr1.mgf			187100	186900	220400	148600	372400
High	A	iVVVTAGVR	3388	Unambiguous		0	0		N-Term(TMT6plex)	CID	1	0	1	161400	104000	111600	182400	66320	193300	No Proteins	Not Used	10588	0.002	0.0466	623	624	2.01	0	1170000	2	571.877	1142.75	0	-0.12	0.67	2392	2393	MS2	0/0	0	0	2ms21_2014_479_PFL_Fr1.mgf			161400	104000	111600	182400	66320
High	A	eLDESLQVAER	3408	Unambiguous	Isoform 4 of Clusterin OS=Homo sapiens GN=CLU - [CLUS_HUMAN]	4	1	P10909-4	N-Term(TMT6plex)	CID	1	0	1	71950	126200	181000	66240	67410	97980	Unique	Used	10592	0.001	0.0201	938	921	3.64	0	1879000	2	759.4	1517.79	0	-5.41	0.67	2404	2405	MS2	0/0	0	0	2ms21_2014_479_PFL_Fr1.mgf			71950	126200	181000	66240	67410
High	A	vSYQLADGGEPQSVQVDGQAR	3514	Unambiguous	Isoform 3 of Tenascin-X OS=Homo sapiens GN=TNXB - [TENX_HUMAN]	3	1	P22105-3	N-Term(TMT6plex)	CID	1	0	1	31020	32140	34410	28000	21730	39160	Unique	Used	10619	0	0.000146	1685	1614	3.44	0	1019000	3	811.744	2433.22	0	-1	0.68	2477	2478	MS2	0/0	0	0	2ms21_2014_479_PFL_Fr1.mgf			31020	32140	34410	28000	21730
High	A	vSYQLADGGEPQSVQVDGQAR	3514	Unambiguous	Isoform 3 of Tenascin-X OS=Homo sapiens GN=TNXB - [TENX_HUMAN]	3	1	P22105-3	N-Term(TMT6plex)	CID	1	0	1	38160	16000	19270	32720	23130	29710	Unique	Used	10622	0	0.00306	1670	1594	4	0	354200	2	1217.11	2433.22	0	-1.54	0.68	2483	2484	MS2	0/0	0	0	2ms21_2014_479_PFL_Fr1.mgf			38160	16000	19270	32720	23130
High	A	dIQMTQSPSSLSASVGDR	2626	Unambiguous	Ig kappa chain V-I region Scw OS=Homo sapiens PE=1 SV=1 - [KV117_HUMAN]	1	1	P01609	N-Term(TMT6plex)	CID	0.0245	0	1	42500	28570	53270	38850		52490	Unique	Used	10623	0	2.34e-05	1263	1337	4.08	0	2908000	3	703.356	2108.05	0	2.65	0.7	2486	2487	MS2	0/0	0	0	2ms21_2014_479_PFL_Fr1.mgf			42500	28570	53270	38850
High	A	dIQMTQSPSSLSASVGDR	2626	Unambiguous	Ig kappa chain V-I region Scw OS=Homo sapiens PE=1 SV=1 - [KV117_HUMAN]	1	1	P01609	N-Term(TMT6plex)	CID	1	0	1	1204000	711700	930300	466200	688100	1086000	Unique	Used	10624	0	4.28e-05	1157	1218	5.92	0	10160000	2	1054.53	2108.05	0	0.08	0.7	2488	2489	MS2	0/0	0	0	2ms21_2014_479_PFL_Fr1.mgf			1204000	711700	930300	466200	688100
High	A	aYLEEEcPATLR	3553	Unambiguous	Zinc-alpha-2-glycoprotein OS=Homo sapiens GN=AZGP1 PE=1 SV=2 - [ZA2G_HUMAN]	1	1	P25311	N-Term(TMT6plex); C7(Carbamidomethyl)	CID	1	0	1	281500	856700	600600	537100	529100	950700	Unique	Used	10629	0.001	0.00865	930	867	4.15	0	6042000	2	840.927	1680.85	0	-0.23	0.7	2499	2500	MS2	0/0	0	0	2ms21_2014_479_PFL_Fr1.mgf			281500	856700	600600	537100	529100
Middle	A	dIQmTQSPSSLSATVGDR	3198	Unambiguous		0	0		N-Term(TMT6plex); M4(Oxidation)	CID	1	0	1	168300	194200	86260	131000	95300	209500	No Proteins	Not Used	10632	0.047	0.591	1336	1236	2.77	0	2089000	2	1069.54	2138.06	0	2.21	0.7	2505	2506	MS2	0/0	0	0	2ms21_2014_479_PFL_Fr1.mgf			168300	194200	86260	131000	95300
High	A	dTEEEDFHVDQVTTVk	3572	Unambiguous	Alpha-1-antitrypsin OS=Homo sapiens GN=SERPINA1 PE=1 SV=3 - [A1AT_HUMAN]	3	1	P01009	N-Term(TMT6plex); K16(TMT6plex)	CID	1	0	1	162400	1427000	633800	173000	1128000	1022000	Unique	Used	10634	0	0.000653	1887	1833	4.25	0	21760000	3	784.067	2350.19	0	2.19	0.7	2510	2511	MS2	0/0	0	0	2ms21_2014_479_PFL_Fr1.mgf			162400	1427000	633800	173000	1128000
High	A	vAAGAFQGLR	3574	Unambiguous	Leucine-rich alpha-2-glycoprotein OS=Homo sapiens GN=LRG1 PE=1 SV=2 - [A2GL_HUMAN]	1	1	P02750	N-Term(TMT6plex)	CID	1	0	1	333000	601000	610000	275300	342600	1511000	Unique	Used	10635	0.001	0.015	1504	1539	2.43	0	5165000	2	609.862	1218.72	0	1.05	0.7	2512	2513	MS2	0/0	0	0	2ms21_2014_479_PFL_Fr1.mgf			333000	601000	610000	275300	342600
High	A	tVAAcNLPIVR	3579	Unambiguous	Protein AMBP OS=Homo sapiens GN=AMBP PE=1 SV=1 - [AMBP_HUMAN]	1	1	P02760	N-Term(TMT6plex); C5(Carbamidomethyl)	CID	1	0	1	1208000	981300	769500	1510000	837500	1195000	Unique	Used	10636	0	0.00226	1257	1334	4.17	0	10140000	2	721.922	1442.84	0	1.09	0.7	2514	2515	MS2	0/0	0	0	2ms21_2014_479_PFL_Fr1.mgf			1208000	981300	769500	1510000	837500
High	A	fSSGITGcVk	3592	Unambiguous	Heparan sulfate proteoglycan 2 (Perlecan), isoform CRA_b OS=Homo sapiens GN=HSPG2 PE=4 SV=1 - [A0A024RAB6_HUMAN]	3	1	A0A024RAB6	N-Term(TMT6plex); C8(Carbamidomethyl); K10(TMT6plex)	CID	1	0	1	811600	304100	352400	746700	406800	492300	Unique	Used	10639	0.002	0.0439	1274	1330	2.28	0	6594000	3	505.286	1513.84	0	-0.35	0.7	2521	2522	MS2	0/0	0	0	2ms21_2014_479_PFL_Fr1.mgf			811600	304100	352400	746700	406800
High	A	vDGALcMEk	3606	Unambiguous	Hemopexin OS=Homo sapiens GN=HPX PE=1 SV=2 - [HEMO_HUMAN]	1	1	P02790	N-Term(TMT6plex); C6(Carbamidomethyl); K9(TMT6plex)	CID	1	0	1	1356000	5295000	2328000	954300	2886000	4543000	Unique	Used	10644	0.001	0.00687	1246	1290	3.65	0	22040000	2	740.899	1480.79	0	0.74	0.7	2532	2533	MS2	0/0	0	0	2ms21_2014_479_PFL_Fr1.mgf			1356000	5295000	2328000	954300	2886000
High	A	tPENYPNAGLTMNYcR	3625	Unambiguous	cDNA FLJ58778, highly similar to Plasminogen (EC 3.4.21.7) OS=Homo sapiens PE=2 SV=1 - [B4DPH4_HUMAN]	3	1	B4DPH4	N-Term(TMT6plex); C15(Carbamidomethyl)	CID	1	0	1	20010	27250	14820	24210	20560	21640	Unique	Used	10649	0	0.000199	447	439	4.31	0	1039000	2	1065.5	2130	0	3	0.7	2543	2544	MS2	0/0	0	0	2ms21_2014_479_PFL_Fr1.mgf			20010	27250	14820	24210	20560
High	A	yEELQVTVGR	3653	Unambiguous	Keratin, type II cytoskeletal 2 epidermal OS=Homo sapiens GN=KRT2 PE=1 SV=2 - [K22E_HUMAN]	1	1	P35908	N-Term(TMT6plex)	CID	1	0	1	291400	561300	248500	188900	649400	715400	Unique	Used	10656	0.001	0.0124	1317	1352	3.53	0	5401000	2	711.892	1422.78	0	-1.08	0.7	2558	2559	MS2	0/0	0	0	2ms21_2014_479_PFL_Fr1.mgf			291400	561300	248500	188900	649400
High	A	aVLDGcSccLVcAR	3665	Unambiguous		0	0		N-Term(TMT6plex); C6(Carbamidomethyl); C8(Carbamidomethyl); C9(Carbamidomethyl); C12(Carbamidomethyl)	CID	1	0	1	1239000	852900	658700	1590000	722600	1086000	No Proteins	Not Used	10660	0.001	0.00698	349	273	3.4	0	10040000	2	935.435	1869.86	0	-0.26	0.7	2567	2568	MS2	0/0	0	0	2ms21_2014_479_PFL_Fr1.mgf			1239000	852900	658700	1590000	722600
High	A	aVLDGcSccLVcAR	3665	Unambiguous		0	0		N-Term(TMT6plex); C6(Carbamidomethyl); C8(Carbamidomethyl); C9(Carbamidomethyl); C12(Carbamidomethyl)	CID	1	0	1	32680	27050	20010	34580	33280	31640	No Proteins	Not Used	10661	0.001	0.0119	337	265	1.87	0	400100	3	623.959	1869.86	0	-0.85	0.7	2569	2570	MS2	0/0	0	0	2ms21_2014_479_PFL_Fr1.mgf			32680	27050	20010	34580	33280
High	A	ePcGGLEDAVNEAk	3705	Unambiguous	Collagen alpha-1(VI) chain OS=Homo sapiens GN=COL6A1 PE=4 SV=1 - [A0A087X0S5_HUMAN]	2	1	A0A087X0S5	N-Term(TMT6plex); C3(Carbamidomethyl); K14(TMT6plex)	CID	1	0	1				8319			No Quan Values	Not Used	10670	0.002	0.0502	1370	1263	2.82	0	101000	3	649.67	1947	0	3.34	0.7	2589	2590	MS2	0/0	0	0	2ms21_2014_479_PFL_Fr1.mgf						8319
High	A	aTWSGAVLAGR	3711	Unambiguous	Alpha-1B-glycoprotein OS=Homo sapiens GN=A1BG PE=1 SV=4 - [A1BG_HUMAN]	1	1	P04217	N-Term(TMT6plex)	CID	1	0	1	3731000	12220000	4038000	792000	7764000	15110000	Unique	Used	10673	0.001	0.00616	1477	1514	3.48	0	62250000	2	659.378	1317.75	0	0.01	0.7	2596	2597	MS2	0/0	0	0	2ms21_2014_479_PFL_Fr1.mgf			3731000	12220000	4038000	792000	7764000
High	A	gVAGGSVAVLcPYNR	3715	Unambiguous	Polymeric immunoglobulin receptor OS=Homo sapiens GN=PIGR PE=1 SV=4 - [PIGR_HUMAN]	1	1	P01833	N-Term(TMT6plex); C11(Carbamidomethyl)	CID	1	0	1	2803000	2871000	3131000	439000	1049000	2904000	Unique	Used	10674	0	5.09e-05	1706	1711	5.72	0	21860000	2	874.97	1748.93	0	0.48	0.7	2598	2599	MS2	0/0	0	0	2ms21_2014_479_PFL_Fr1.mgf			2803000	2871000	3131000	439000	1049000
High	A	dImAEIYk	3719	Unambiguous		0	0		N-Term(TMT6plex); M3(Oxidation); K8(TMT6plex)	CID	1	0	1	1020000	1091000	1411000	2084000	881800	771100	No Proteins	Not Used	10675	0.001	0.026	1228	1212	1.63	0	10190000	2	728.91	1456.81	0	0.14	0.72	2600	2601	MS2	0/0	0	0	2ms21_2014_479_PFL_Fr1.mgf			1020000	1091000	1411000	2084000	881800
High	A	gQFETYLR	3728	Unambiguous	Acid ceramidase OS=Homo sapiens GN=ASAH1 PE=1 SV=1 - [E7EMM4_HUMAN]	8	1	E7EMM4	N-Term(TMT6plex)	CID	1	0	1	34560	37550	40770	33930	31170	44240	Unique	Used	10677	0.005	0.165	694	696	2.05	0	335900	2	621.838	1242.67	0	1.07	0.72	2604	2605	MS2	0/0	0	0	2ms21_2014_479_PFL_Fr1.mgf			34560	37550	40770	33930	31170
High	A	vGGTGMFTVR	2691	Unambiguous	cDNA FLJ38724 fis, clone KIDNE2010151, highly similar to UROMODULIN OS=Homo sapiens PE=2 SV=1 - [B3KTU0_HUMAN]	8	1	B3KTU0	N-Term(TMT6plex)	CID	1	0	1	8870000	8558000	1025000	12830000	19940000	6887000	Unique	Used	10678	0.001	0.0233	918	995	2.64	0	86890000	2	627.347	1253.69	0	-0.58	0.72	2607	2608	MS2	0/0	0	0	2ms21_2014_479_PFL_Fr1.mgf			8870000	8558000	1025000	12830000	19940000
High	A	eGYYGYTGAFR	3734	Unambiguous	Transferrin variant (Fragment) OS=Homo sapiens PE=2 SV=1 - [Q53H26_HUMAN]	6	1	Q53H26	N-Term(TMT6plex)	CID	1	0	1	454800	7585000	2794000	203900	6364000	6208000	Unique	Used	10679	0.001	0.00659	389	370	3.15	0	37820000	2	756.869	1512.73	0	-0.47	0.72	2609	2610	MS2	0/0	0	0	2ms21_2014_479_PFL_Fr1.mgf			454800	7585000	2794000	203900	6364000
High	A	gVAGGSVAVLcPYNR	3715	Unambiguous	Polymeric immunoglobulin receptor OS=Homo sapiens GN=PIGR PE=1 SV=4 - [PIGR_HUMAN]	1	1	P01833	N-Term(TMT6plex); C11(Carbamidomethyl)	CID	1	0	1	47260	62310	62850	29940		60720	Unique	Used	10680	0	0.00288	1657	1665	2.51	0	719800	3	583.648	1748.93	0	-0.78	0.72	2611	2612	MS2	0/0	0	0	2ms21_2014_479_PFL_Fr1.mgf			47260	62310	62850	29940
High	A	dIQMTQSPSSLSASVGDR	2626	Unambiguous	Ig kappa chain V-I region Scw OS=Homo sapiens PE=1 SV=1 - [KV117_HUMAN]	1	1	P01609	N-Term(TMT6plex)	CID	1	0	1	642400	316100	526600	307100	409900	503600	Unique	Used	10681	0.001	0.00829	1165	1220	5.2	0	23320000	2	1054.53	2108.05	0	0.66	0.72	2613	2614	MS2	0/0	0	0	2ms21_2014_479_PFL_Fr1.mgf			642400	316100	526600	307100	409900
High	A	dFcGGVIIR	3764	Unambiguous	Vitamin K-dependent protein Z OS=Homo sapiens GN=PROZ PE=1 SV=2 - [PROZ_HUMAN]	3	1	P22891	N-Term(TMT6plex); C3(Carbamidomethyl)	CID	1	0	1	1817000	1325000	1310000	3114000	3195000	2208000	Unique	Used	10688	0.002	0.0448	1032	1042	2.99	0	17270000	2	633.347	1265.69	0	-0.77	0.72	2629	2630	MS2	0/0	0	0	2ms21_2014_479_PFL_Fr1.mgf			1817000	1325000	1310000	3114000	3195000
High	A	lcmGSGLNLcEPNNk	3776	Unambiguous	Transferrin variant (Fragment) OS=Homo sapiens PE=2 SV=1 - [Q53H26_HUMAN]	6	1	Q53H26	N-Term(TMT6plex); C2(Carbamidomethyl); M3(Oxidation); C10(Carbamidomethyl); K15(TMT6plex)	CID	1	0	1	16470	163000	71180	16530	130400	134200	Unique	Used	10691	0	0.000556	1217	1223	2.63	0	839900	2	1091.04	2181.08	0	-2.92	0.72	2635	2636	MS2	0/0	0	0	2ms21_2014_479_PFL_Fr1.mgf			16470	163000	71180	16530	130400
High	A	sDVmYTDWk	3780	Unambiguous	Alpha-1-acid glycoprotein 2 OS=Homo sapiens GN=ORM2 PE=1 SV=2 - [A1AG2_HUMAN]	1	1	P19652	N-Term(TMT6plex); M4(Oxidation); K9(TMT6plex)	CID	1	0	1	7299	12790	11960		7665	11000	Unique	Used	10692	0.002	0.0511	666	684	1.69	0	356400	2	809.91	1618.81	0	-3.31	0.72	2637	2638	MS2	0/0	0	0	2ms21_2014_479_PFL_Fr1.mgf			7299	12790	11960		7665
High	A	gEFYIGSk	3794	Unambiguous	cDNA FLJ76826, highly similar to Homo sapiens ceruloplasmin (ferroxidase) (CP), mRNA OS=Homo sapiens PE=2 SV=1 - [A8K5A4_HUMAN]	5	1	A8K5A4	N-Term(TMT6plex); K8(TMT6plex)	CID	1	0	1	577100	1710000	916800	340600	1285000	1525000	Unique	Used	10695	0.001	0.0313	1371	1391	2.76	0	7985000	2	679.889	1358.77	0	-0.83	0.72	2644	2645	MS2	0/0	0	0	2ms21_2014_479_PFL_Fr1.mgf			577100	1710000	916800	340600	1285000
High	A	sVIPSDGPSVAcVk	3821	Unambiguous	Transferrin variant (Fragment) OS=Homo sapiens PE=2 SV=1 - [Q53H26_HUMAN]	4	1	Q53H26	N-Term(TMT6plex); C12(Carbamidomethyl); K14(TMT6plex)	CID	1	0	1	157000	1921000	875400	158200	1462000	1499000	Unique	Used	10701	0	0.00106	2503	2353	3.39	0	9046000	2	937.53	1874.05	0	3.51	0.72	2657	2658	MS2	0/0	0	0	2ms21_2014_479_PFL_Fr1.mgf			157000	1921000	875400	158200	1462000
High	A	sLGEccDVEDSTTcFNAk	3829	Unambiguous	Vitamin D-binding protein OS=Homo sapiens GN=GC PE=1 SV=1 - [VTDB_HUMAN]	3	1	P02774	N-Term(TMT6plex); C5(Carbamidomethyl); C6(Carbamidomethyl); C14(Carbamidomethyl); K18(TMT6plex)	CID	1	0	1	274900	2353000	667800	406800	595500	1316000	Unique	Used	10703	0.001	0.00379	285	284	4.6	0	8621000	2	1276.08	2551.16	0	1.85	0.72	2662	2663	MS2	0/0	0	0	2ms21_2014_479_PFL_Fr1.mgf			274900	2353000	667800	406800	595500
High	A	ycGNTIPDSIDTSSNTAVVR	3850	Unambiguous	Intrinsic factor-vitamin B12 receptor (Fragment) OS=Homo sapiens GN=CUBN PE=4 SV=1 - [Q7LC53_HUMAN]	2	1	Q7LC53	N-Term(TMT6plex); C2(Carbamidomethyl)	CID	1	0	1	48170	61310	69070	40640	43690	58410	Unique	Used	10709	0	0.00153	1208	1176	3.21	0	1666000	3	800.393	2399.16	0	-2.61	0.72	2675	2676	MS2	0/0	0	0	2ms21_2014_479_PFL_Fr1.mgf			48170	61310	69070	40640	43690
High	A	ycGNTIPDSIDTSSNTAVVR	3850	Unambiguous	Intrinsic factor-vitamin B12 receptor (Fragment) OS=Homo sapiens GN=CUBN PE=4 SV=1 - [Q7LC53_HUMAN]	2	1	Q7LC53	N-Term(TMT6plex); C2(Carbamidomethyl)	CID	1	0	1	318300	344000	582100	343100	489700	454200	Unique	Used	10710	0	0.00021	1239	1203	4.56	0	5738000	2	1200.09	2399.17	0	-0.67	0.72	2677	2678	MS2	0/0	0	0	2ms21_2014_479_PFL_Fr1.mgf			318300	344000	582100	343100	489700
High	A	vLATLcGQESTDTER	3863	Unambiguous	Isoform 2 of Mannan-binding lectin serine protease 2 OS=Homo sapiens GN=MASP2 - [MASP2_HUMAN]	2	1	O00187-2	N-Term(TMT6plex); C6(Carbamidomethyl)	CID	1	0	1	109900		123000	122400	145100	143400	Unique	Used	10713	0	0.000359	1132	1024	4.4	0	7762000	3	636.989	1908.95	0	-0.15	0.72	2684	2685	MS2	0/0	0	0	2ms21_2014_479_PFL_Fr1.mgf			109900		123000	122400	145100
High	A	nPNLPPETVDSLk	3865	Unambiguous	Apolipoprotein D OS=Homo sapiens GN=APOD PE=1 SV=1 - [APOD_HUMAN]	2	1	P05090	N-Term(TMT6plex); K13(TMT6plex)	CID	1	0	1	892400	729200	603600	1750000	586300	1013000	Unique	Used	10714	0	0.000508	1975	2068	4.05	0	8689000	2	941.538	1882.07	0	-0.01	0.72	2686	2687	MS2	0/0	0	0	2ms21_2014_479_PFL_Fr1.mgf			892400	729200	603600	1750000	586300
High	A	eFYSASVAEDAAk	3869	Unambiguous		0	0		N-Term(TMT6plex); K13(TMT6plex)	CID	1	0	1	1169000	729000	867300	1027000	744500	874800	No Proteins	Not Used	10715	0	0.000169	1523	1467	4.77	0	7206000	2	923.486	1845.96	0	0.21	0.72	2688	2689	MS2	0/0	0	0	2ms21_2014_479_PFL_Fr1.mgf			1169000	729000	867300	1027000	744500
High	A	qVVAGLNFR	3879	Unambiguous	cDNA FLJ53075, highly similar to Kininogen-1 OS=Homo sapiens PE=2 SV=1 - [B4DPP8_HUMAN]	5	1	B4DPP8	N-Term(TMT6plex)	CID	1	0	1	39750					24470	Unique	Used	10718	0.002	0.0545	1413	1482	3.5	0	847500	3	411.582	1232.73	0	0.84	0.72	2695	2696	MS2	0/0	0	0	2ms21_2014_479_PFL_Fr1.mgf			39750
High	A	gcSLNcVDDSQDYYVGk	3881	Unambiguous	Prostate stem cell antigen, isoform CRA_a OS=Homo sapiens GN=PSCA PE=4 SV=1 - [D3DWI6_HUMAN]	2	1	D3DWI6	N-Term(TMT6plex); C2(Carbamidomethyl); C6(Carbamidomethyl); K17(TMT6plex)	CID	1	0	1	2912000		2690000	2812000	537700	587400	Unique	Used	10719	0	0.0024	657	660	5.07	0	15160000	2	1219.57	2438.14	0	2.15	0.72	2697	2698	MS2	0/0	0	0	2ms21_2014_479_PFL_Fr1.mgf			2912000		2690000	2812000	537700
High	A	tEDTIFLR	3887	Unambiguous	Alpha-1-acid glycoprotein 1 OS=Homo sapiens GN=ORM1 PE=1 SV=1 - [A1AG1_HUMAN]|Alpha-1-acid glycoprotein 2 OS=Homo sapiens GN=ORM2 PE=1 SV=2 - [A1AG2_HUMAN]	2	2	P02763;P19652	N-Term(TMT6plex)	CID	1	0	1		80260	38050		66870	66040	No Quan Values	Not Used	10720	0.002	0.0607	1124	1217	2.95	0	1934000	2	612.347	1223.69	0	2.92	0.72	2699	2700	MS2	0/0	0	0	2ms21_2014_479_PFL_Fr1.mgf				80260	38050		66870
High	A	iEcVSAETTEDcIAk	3915	Unambiguous	Transferrin variant (Fragment) OS=Homo sapiens PE=2 SV=1 - [Q53H26_HUMAN]	6	1	Q53H26	N-Term(TMT6plex); C3(Carbamidomethyl); C12(Carbamidomethyl); K15(TMT6plex)	CID	1	0	1	593300	15170000	5681000		12740000	10780000	Unique	Used	10727	0	6.07e-06	1568	1578	6.59	0	65690000	2	1092.55	2184.1	0	1.52	0.73	2715	2716	MS2	0/0	0	0	2ms21_2014_479_PFL_Fr1.mgf			593300	15170000	5681000		12740000
High	A	iEcVSAETTEDcIAk	3915	Unambiguous	Transferrin variant (Fragment) OS=Homo sapiens PE=2 SV=1 - [Q53H26_HUMAN]	6	1	Q53H26	N-Term(TMT6plex); C3(Carbamidomethyl); C12(Carbamidomethyl); K15(TMT6plex)	CID	1	0	1		3396000	1326000		3381000	3157000	No Quan Values	Not Used	10731	0	7.55e-05	1567	1580	5.38	0	32590000	2	1092.55	2184.1	0	1.63	0.73	2723	2724	MS2	0/0	0	0	2ms21_2014_479_PFL_Fr1.mgf				3396000	1326000		3381000
High	A	qVEGMEDWk	2870	Unambiguous	Zinc-alpha-2-glycoprotein OS=Homo sapiens GN=AZGP1 PE=1 SV=2 - [ZA2G_HUMAN]	1	1	P25311	N-Term(TMT6plex); K9(TMT6plex)	CID	1	0	1	1165000	3353000	2587000	2415000	2327000	3690000	Unique	Used	10737	0.001	0.0176	1050	1092	2.86	0	19300000	2	790.414	1579.82	0	0.48	0.73	2737	2738	MS2	0/0	0	0	2ms21_2014_479_PFL_Fr1.mgf			1165000	3353000	2587000	2415000	2327000
High	A	yAcNcVVGYIGER	3961	Unambiguous	Isoform 2 of Pro-epidermal growth factor OS=Homo sapiens GN=EGF - [EGF_HUMAN]	3	1	P01133-2	N-Term(TMT6plex); C3(Carbamidomethyl); C5(Carbamidomethyl)	CID	1	0	1	1576000	988000	769700	2527000	1068000	1464000	Unique	Used	10738	0.001	0.00822	411	413	3.78	0	13500000	2	895.433	1789.86	0	1.52	0.73	2739	2740	MS2	0/0	0	0	2ms21_2014_479_PFL_Fr1.mgf			1576000	988000	769700	2527000	1068000
High	A	nPDSSTTGPWcYTTDPTVR	3965	Unambiguous	Thrombin light chain (Fragment) OS=Homo sapiens GN=F2 PE=4 SV=1 - [C9JV37_HUMAN]	3	1	C9JV37	N-Term(TMT6plex); C11(Carbamidomethyl)	CID	1	0	1	63130	35350	38910	78420	59850	39710	Unique	Used	10739	0	0.00288	640	761	3.99	0	573800	2	1192.55	2384.09	-0.01	-5.06	0.73	2741	2742	MS2	0/0	0	0	2ms21_2014_479_PFL_Fr1.mgf			63130	35350	38910	78420	59850
High	A	yAcNcVVGYIGER	3961	Unambiguous	Isoform 2 of Pro-epidermal growth factor OS=Homo sapiens GN=EGF - [EGF_HUMAN]	3	1	P01133-2	N-Term(TMT6plex); C3(Carbamidomethyl); C5(Carbamidomethyl)	CID	1	0	1	59170	71510	72870	75870	60270	90250	Unique	Used	10741	0.001	0.0156	418	417	2.17	0	691600	3	597.291	1789.86	0	0.59	0.73	2745	2746	MS2	0/0	0	0	2ms21_2014_479_PFL_Fr1.mgf			59170	71510	72870	75870	60270
High	A	nPDSSTTGPWcYTTDPTVR	3965	Unambiguous	Thrombin light chain (Fragment) OS=Homo sapiens GN=F2 PE=4 SV=1 - [C9JV37_HUMAN]	3	1	C9JV37	N-Term(TMT6plex); C11(Carbamidomethyl)	CID	1	0	1	43370	35540	39420	58320	58930	44030	Unique	Used	10742	0	3.43e-05	705	831	4.27	0	2791000	3	795.372	2384.1	0	-0.58	0.73	2748	2749	MS2	0/0	0	0	2ms21_2014_479_PFL_Fr1.mgf			43370	35540	39420	58320	58930
High	A	nPDSSTTGPWcYTTDPTVR	3965	Unambiguous	Thrombin light chain (Fragment) OS=Homo sapiens GN=F2 PE=4 SV=1 - [C9JV37_HUMAN]	3	1	C9JV37	N-Term(TMT6plex); C11(Carbamidomethyl)	CID	1	0	1	518900	376200	352200	867900	658900	397900	Unique	Used	10748	0	0.00055	763	885	4.91	0	6158000	2	1192.56	2384.11	0	2.01	0.73	2761	2762	MS2	0/0	0	0	2ms21_2014_479_PFL_Fr1.mgf			518900	376200	352200	867900	658900
High	A	qVVAGLNFR	3879	Unambiguous	cDNA FLJ53075, highly similar to Kininogen-1 OS=Homo sapiens PE=2 SV=1 - [B4DPP8_HUMAN]	5	1	B4DPP8	N-Term(TMT6plex)	CID	1	0	1	975400	462900	509100	1012000	683800	549800	Unique	Used	10751	0.001	0.0248	1413	1484	2.94	0	6013000	2	616.87	1232.73	0	1.52	0.73	2768	2769	MS2	0/0	0	0	2ms21_2014_479_PFL_Fr1.mgf			975400	462900	509100	1012000	683800
Middle	A	qEcSIPVcGQDQVTVAMTPR	3060	Unambiguous	Thrombin light chain (Fragment) OS=Homo sapiens GN=F2 PE=4 SV=1 - [C9JV37_HUMAN]	3	1	C9JV37	N-Term(TMT6plex); C3(Carbamidomethyl); C8(Carbamidomethyl)	CID	1	0	1		10600					No Quan Values	Not Used	10753	0.031	0.48	1201	1183	2.11	0	507700	3	835.745	2505.22	0	3.64	0.73	2772	2773	MS2	0/0	0	0	2ms21_2014_479_PFL_Fr1.mgf				10600
High	A	dIQMTQSPSSLPASVGDR	3004	Unambiguous		0	0		N-Term(TMT6plex)	CID	1	0	1	217100	89730	101200	107900	119100	120900	No Proteins	Not Used	10754	0	0.000561	1392	1308	4.36	0	2177000	2	1059.54	2118.07	0	0.77	0.73	2774	2775	MS2	0/0	0	0	2ms21_2014_479_PFL_Fr1.mgf			217100	89730	101200	107900	119100
High	A	eYcGVPGDGDEELLR	4042	Unambiguous	Protein AMBP OS=Homo sapiens GN=AMBP PE=1 SV=1 - [AMBP_HUMAN]	1	1	P02760	N-Term(TMT6plex); C3(Carbamidomethyl)	CID	1	0	1	11490000	5389000	6147000	11930000	7815000	9106000	Unique	Used	10756	0	0.000324	376	365	4.55	0	101000000	2	969.46	1937.91	0	0.31	0.73	2779	2780	MS2	0/0	0	0	2ms21_2014_479_PFL_Fr1.mgf			11490000	5389000	6147000	11930000	7815000
High	A	scAVAEYGVYVk	4093	Unambiguous	Haptoglobin OS=Homo sapiens GN=HP PE=1 SV=1 - [HPT_HUMAN]	3	1	P00738	N-Term(TMT6plex); C2(Carbamidomethyl); K12(TMT6plex)	CID	1	0	1	368400	4904000	1184000	260200	561900	4278000	Unique	Used	10767	0	0.000356	2109	2012	4.92	0	16280000	2	902.491	1803.97	0	1.51	0.73	2803	2804	MS2	0/0	0	0	2ms21_2014_479_PFL_Fr1.mgf			368400	4904000	1184000	260200	561900
Middle	A	gTQEQDFYVTSETVVR	4099	Unambiguous	Plasma serine protease inhibitor OS=Homo sapiens GN=SERPINA5 PE=1 SV=3 - [IPSP_HUMAN]	2	1	P05154	N-Term(TMT6plex)	CID	1	0	1	63050	70350	57220	93520	39260	63760	Unique	Used	10768	0.016	0.302	1616	1699	3.11	0	4947000	3	696.695	2088.07	0.01	11.62	0.73	2805	2806	MS2	0/0	0	0	2ms21_2014_479_PFL_Fr1.mgf			63050	70350	57220	93520	39260
High	A	vTTVASHTSDSDVPSGVTEVVVk	4105	Unambiguous	Isoform 4 of Clusterin OS=Homo sapiens GN=CLU - [CLUS_HUMAN]	4	1	P10909-4	N-Term(TMT6plex); K23(TMT6plex)	CID	1	0	1	106800	116700	160300	83600	123500	135300	Unique	Used	10770	0	0.000114	3672	3479	3.95	0	2073000	3	924.84	2772.51	0	1.03	0.73	2809	2810	MS2	0/0	0	0	2ms21_2014_479_PFL_Fr1.mgf			106800	116700	160300	83600	123500
High	A	eYcGVPGDGDEELLR	4042	Unambiguous	Protein AMBP OS=Homo sapiens GN=AMBP PE=1 SV=1 - [AMBP_HUMAN]	1	1	P02760	N-Term(TMT6plex); C3(Carbamidomethyl)	CID	1	0	1	759700	390900	416200	848100	518300	619900	Unique	Used	10773	0.002	0.0407	376	366	1.85	0	16170000	3	646.642	1937.91	0	0.21	0.73	2816	2817	MS2	0/0	0	0	2ms21_2014_479_PFL_Fr1.mgf			759700	390900	416200	848100	518300
High	A	sVLVAAGETATLR	4129	Unambiguous		0	0		N-Term(TMT6plex)	CID	1	0	1	907500	538800	489700	617100	640300	596000	No Proteins	Not Used	10776	0	0.0011	1943	1930	4.54	0	6046000	2	758.949	1516.89	0	1.05	0.75	2823	2824	MS2	0/0	0	0	2ms21_2014_479_PFL_Fr1.mgf			907500	538800	489700	617100	640300
High	A	aQYTLMAQAVDR	4141	Unambiguous	Isoform 2 of Cadherin-11 OS=Homo sapiens GN=CDH11 - [CAD11_HUMAN]	5	1	P55287-2	N-Term(TMT6plex)	CID	1	0	1	442800	109900	116100	272300	161000	182100	Unique	Used	10779	0	0.00199	1093	1134	3.6	0	1839000	2	798.421	1595.83	0	-4.13	0.75	2829	2830	MS2	0/0	0	0	2ms21_2014_479_PFL_Fr1.mgf			442800	109900	116100	272300	161000
High	A	tLDEYWR	4154	Unambiguous	cDNA FLJ38724 fis, clone KIDNE2010151, highly similar to UROMODULIN OS=Homo sapiens PE=2 SV=1 - [B3KTU0_HUMAN]	6	1	B3KTU0	N-Term(TMT6plex)	CID	1	0	1	1125000	1042000	260000	1380000	1903000	870900	Unique	Used	10782	0.002	0.0562	542	541	2.75	0	10100000	2	606.316	1211.63	0	-0.35	0.75	2836	2837	MS2	0/0	0	0	2ms21_2014_479_PFL_Fr1.mgf			1125000	1042000	260000	1380000	1903000
High	A	gSIQVDGEELVSGR	4170	Unambiguous	Heparan sulfate proteoglycan 2 (Perlecan), isoform CRA_b OS=Homo sapiens GN=HSPG2 PE=4 SV=1 - [A0A024RAB6_HUMAN]	3	1	A0A024RAB6	N-Term(TMT6plex)	CID	1	0	1	1144000	522800	530300	1214000	538500	671900	Unique	Used	10787	0	0.00106	1439	1414	4.26	0	6652000	2	837.948	1674.89	0	2.09	0.75	2847	2848	MS2	0/0	0	0	2ms21_2014_479_PFL_Fr1.mgf			1144000	522800	530300	1214000	538500
High	A	gYMEIEQSVk	4183	Unambiguous		0	0		N-Term(TMT6plex); K10(TMT6plex)	CID	1	0	1	1105000	699700	462800	1328000	785500	736600	No Proteins	Not Used	10790	0.001	0.0181	1427	1469	3.8	0	6805000	2	821.452	1641.9	0	3.12	0.75	2853	2854	MS2	0/0	0	0	2ms21_2014_479_PFL_Fr1.mgf			1105000	699700	462800	1328000	785500
High	A	eYcGVPGDGDEELLR	4042	Unambiguous	Protein AMBP OS=Homo sapiens GN=AMBP PE=1 SV=1 - [AMBP_HUMAN]	1	1	P02760	N-Term(TMT6plex); C3(Carbamidomethyl)	CID	1	0	1	17690000	8311000	8045000	19670000	12740000	14300000	Unique	Used	10791	0	1.29e-05	376	365	4.41	0	101000000	2	969.46	1937.91	0	0.31	0.75	2856	2857	MS2	0/0	0	0	2ms21_2014_479_PFL_Fr1.mgf			17690000	8311000	8045000	19670000	12740000
High	A	dPDAQPGGELMLGGTDSk	4193	Unambiguous	Cathepsin D OS=Homo sapiens GN=CTSD PE=1 SV=1 - [CATD_HUMAN]	1	1	P07339	N-Term(TMT6plex); K18(TMT6plex)	CID	1	0	1	50640	61660	59570	45020	69820	82220	Unique	Used	10792	0.001	0.00406	1578	1557	2.99	0	1665000	3	749.384	2246.14	0	-0.51	0.75	2858	2859	MS2	0/0	0	0	2ms21_2014_479_PFL_Fr1.mgf			50640	61660	59570	45020	69820
High	A	vEDYDAADDVQLSk	4195	Unambiguous	Basal cell adhesion molecule OS=Homo sapiens GN=BCAM PE=4 SV=1 - [A0A087WXM8_HUMAN]	6	1	A0A087WXM8	N-Term(TMT6plex); K14(TMT6plex)	CID	1	0	1	154500	83440	113900	116400	110700	111600	Unique	Used	10793	0	0.000184	1713	1542	4.5	0	1809000	2	1013.52	2026.04	0	0.41	0.75	2860	2861	MS2	0/0	0	0	2ms21_2014_479_PFL_Fr1.mgf			154500	83440	113900	116400	110700
High	A	dSTYSLSSTLTLSk	4222	Unambiguous	Epididymis luminal protein 213 OS=Homo sapiens GN=HEL-213 PE=2 SV=1 - [V9HW34_HUMAN]|Protein IGKV3-11 OS=Homo sapiens GN=IGKV3-11 PE=4 SV=1 - [A0A087WZW8_HUMAN]	16	2	V9HW34;A0A087WZW8	N-Term(TMT6plex); K14(TMT6plex)	CID	1	0	1	302500	288900	277300	202400	291400	372000	Not Unique	Not Used	10799	0	0.00141	2424	2395	3.47	0	5884000	3	654.367	1961.09	0	0.8	0.75	2873	2874	MS2	0/0	0	0	2ms21_2014_479_PFL_Fr1.mgf			302500	288900	277300	202400	291400
High	A	dVNEcLTIPEAck	4224	Unambiguous		0	0		N-Term(TMT6plex); C5(Carbamidomethyl); C12(Carbamidomethyl); K13(TMT6plex)	CID	1	0	1	1366000	1023000	765200	2289000	653100	909100	No Proteins	Not Used	10800	0	0.00011	1559	1441	4.03	0	11180000	2	1004.02	2007.03	0	-0.65	0.75	2875	2876	MS2	0/0	0	0	2ms21_2014_479_PFL_Fr1.mgf			1366000	1023000	765200	2289000	653100
High	A	lGPGMADIck	4228	Unambiguous	cDNA FLJ54596, highly similar to Proactivator polypeptide OS=Homo sapiens PE=2 SV=1 - [B4DEK5_HUMAN]	9	1	B4DEK5	N-Term(TMT6plex); C9(Carbamidomethyl); K10(TMT6plex)	CID	1	0	1	6539000	5702000	8307000	8598000	6608000	7174000	Unique	Used	10801	0.001	0.0159	1704	1642	2.9	0	53040000	2	760.422	1519.84	0	-1.24	0.75	2878	2879	MS2	0/0	0	0	2ms21_2014_479_PFL_Fr1.mgf			6539000	5702000	8307000	8598000	6608000
High	A	gSVTFHcALGPEVANVAk	4240	Unambiguous	Polymeric immunoglobulin receptor OS=Homo sapiens GN=PIGR PE=1 SV=4 - [PIGR_HUMAN]	1	1	P01833	N-Term(TMT6plex); C7(Carbamidomethyl); K18(TMT6plex)	CID	1	0	1	257300	206100	276900	299800	166100	169900	Unique	Used	10804	0	2.78e-05	2949	2936	5.14	0	4523000	3	772.426	2315.26	0	2.41	0.75	2884	2885	MS2	0/0	0	0	2ms21_2014_479_PFL_Fr1.mgf			257300	206100	276900	299800	166100
High	A	nILTSNNIDVk	4249	Unambiguous	Apolipoprotein D OS=Homo sapiens GN=APOD PE=1 SV=1 - [APOD_HUMAN]	2	1	P05090	N-Term(TMT6plex); K11(TMT6plex)	CID	1	0	1	1528000	1185000	956100	2403000	937100	1745000	Unique	Used	10806	0.001	0.00351	2119	2186	3.52	0	12260000	2	844.999	1688.99	0	-2.94	0.75	2889	2890	MS2	0/0	0	0	2ms21_2014_479_PFL_Fr1.mgf			1528000	1185000	956100	2403000	937100
High	A	tGAVYVAEIGAk	4269	Unambiguous		0	0		N-Term(TMT6plex); K12(TMT6plex)	CID	1	0	1	102100	158900	148800	146000	163600	194000	No Proteins	Not Used	10810	0.001	0.00771	1721	1710	4.72	0	2511000	2	818.988	1636.97	0	1.32	0.75	2897	2898	MS2	0/0	0	0	2ms21_2014_479_PFL_Fr1.mgf			102100	158900	148800	146000	163600
High	A	nILTSNNIDVk	4249	Unambiguous	Apolipoprotein D OS=Homo sapiens GN=APOD PE=1 SV=1 - [APOD_HUMAN]	2	1	P05090	N-Term(TMT6plex); K11(TMT6plex)	CID	1	0	1	28180			49170	24410	48450	Unique	Used	10811	0.006	0.172	2195	2205	2.07	0	472900	3	563.67	1688.99	0	-0.27	0.75	2900	2901	MS2	0/0	0	0	2ms21_2014_479_PFL_Fr1.mgf			28180			49170	24410
High	A	vVEQMcITQYER	4275	Unambiguous		0	0		N-Term(TMT6plex); C6(Carbamidomethyl)	CID	1	0	1	108300	101900	44960	92620		85290	No Proteins	Not Used	10812	0	8.03e-05	956	902	4.12	0	3122000	3	595.634	1784.89	0	-0.59	0.75	2902	2903	MS2	0/0	0	0	2ms21_2014_479_PFL_Fr1.mgf			108300	101900	44960	92620
High	A	dASGATFTWTPSSGk	4282	Unambiguous	Putative uncharacterized protein DKFZp686M08189 OS=Homo sapiens GN=DKFZp686M08189 PE=2 SV=1 - [Q6MZX9_HUMAN]	2	1	Q6MZX9	N-Term(TMT6plex); K15(TMT6plex)	CID	1	0	1	115900	92780	126300	128900	117500	153200	Unique	Used	10814	0.001	0.0207	1593	1563	2.48	0	2264000	3	657.679	1971.02	0	-0.07	0.75	2906	2907	MS2	0/0	0	0	2ms21_2014_479_PFL_Fr1.mgf			115900	92780	126300	128900	117500
Middle	A	gIAAQPLYAGYcNHENM	4284	Unambiguous	Beta-hexosaminidase subunit beta OS=Homo sapiens GN=HEL-248 PE=1 SV=1 - [Q5URX0_HUMAN]	2	1	Q5URX0	N-Term(TMT6plex); C12(Carbamidomethyl)	CID	1	0	1	77720	51720	47490	69460	62750	51270	Unique	Used	10815	0.014	0.283	351	317	2.94	0	2148000	2	1069.5	2137.98	-0.01	-7.62	0.75	2908	2909	MS2	0/0	0	0	2ms21_2014_479_PFL_Fr1.mgf			77720	51720	47490	69460	62750
High	A	yAATSQVLLPSk	4295	Unambiguous		0	0		N-Term(TMT6plex); K12(TMT6plex)	CID	1	0	1							No Proteins	Not Used	10817	0.001	0.0299	1693	1729	1.88	0	171000	3	579.351	1736.04	0	0.97	0.75	2913	2914	MS2	0/0	0	0	2ms21_2014_479_PFL_Fr1.mgf
High	A	yAATSQVLLPSk	4295	Unambiguous		0	0		N-Term(TMT6plex); K12(TMT6plex)	CID	1	0	1	1266000	735200	561000	911200	1372000	1371000	No Proteins	Not Used	10818	0	0.00078	1726	1766	3.78	0	9058000	2	868.521	1736.03	0	-0.81	0.75	2915	2916	MS2	0/0	0	0	2ms21_2014_479_PFL_Fr1.mgf			1266000	735200	561000	911200	1372000
High	A	tVAGPVGGSLSVQcPYEk	4302	Unambiguous		0	0		N-Term(TMT6plex); C14(Carbamidomethyl); K18(TMT6plex)	CID	1	0	1	452900	390700	287400	383600	245800	338700	No Proteins	Not Used	10819	0	1.09e-05	2673	2727	6.57	0	4297000	2	1154.12	2307.23	-0.01	-4.75	0.75	2917	2918	MS2	0/0	0	0	2ms21_2014_479_PFL_Fr1.mgf			452900	390700	287400	383600	245800
High	A	nLmIDIQk	4315	Unambiguous		0	0		N-Term(TMT6plex); M3(Oxidation); K8(TMT6plex)	CID	1	0	1	104600	100300	69120	113300	93980	102400	No Proteins	Not Used	10822	0.002	0.0405	1970	1949	2.14	0	2627000	2	724.931	1448.85	0	0.1	0.75	2924	2925	MS2	0/0	0	0	2ms21_2014_479_PFL_Fr1.mgf			104600	100300	69120	113300	93980
High	A	cSTSSLLEAcTFR	4327	Unambiguous	Transferrin variant (Fragment) OS=Homo sapiens PE=2 SV=1 - [Q53H26_HUMAN]	6	1	Q53H26	N-Term(TMT6plex); C1(Carbamidomethyl); C10(Carbamidomethyl)	CID	1	0	1	10770	7332			7565		Unique	Used	10825	0.001	0.00814	417	413	2.43	0	250900	3	587.621	1760.85	0	-1.04	0.77	2930	2931	MS2	0/0	0	0	2ms21_2014_479_PFL_Fr1.mgf			10770	7332			7565
High	A	aLSIGFETcR	4333	Unambiguous	CD44 antigen OS=Homo sapiens GN=CD44 PE=1 SV=2 - [H0YD13_HUMAN]	26	1	H0YD13	N-Term(TMT6plex); C9(Carbamidomethyl)	CID	1	0	1			23700				No Quan Values	Not Used	10827	0.001	0.00461	820	830	2.5	0	1657000	3	461.582	1382.73	0	0.12	0.77	2935	2936	MS2	0/0	0	0	2ms21_2014_479_PFL_Fr1.mgf					23700
High	A	aLSIGFETcR	4333	Unambiguous	CD44 antigen OS=Homo sapiens GN=CD44 PE=1 SV=2 - [H0YD13_HUMAN]	26	1	H0YD13	N-Term(TMT6plex); C9(Carbamidomethyl)	CID	1	0	1	26450000	21870000	18720000	31490000	19990000	24340000	Unique	Used	10836	0	0.00187	820	830	4.12	0	228800000	2	691.869	1382.73	0	-0.16	0.77	2955	2956	MS2	0/0	0	0	2ms21_2014_479_PFL_Fr1.mgf			26450000	21870000	18720000	31490000	19990000
High	A	aLSIGFETcR	4333	Unambiguous	CD44 antigen OS=Homo sapiens GN=CD44 PE=1 SV=2 - [H0YD13_HUMAN]	26	1	H0YD13	N-Term(TMT6plex); C9(Carbamidomethyl)	CID	1	0	1	1951000	1376000	1203000	2411000	1480000	1668000	Unique	Used	10838	0.001	0.00876	820	830	3.6	0	228800000	2	691.869	1382.73	0	-0.16	0.77	2959	2960	MS2	0/0	0	0	2ms21_2014_479_PFL_Fr1.mgf			1951000	1376000	1203000	2411000	1480000
High	A	dIQMTQSPSSLSATVGDR	3198	Unambiguous		0	0		N-Term(TMT6plex)	CID	1	0	1	25230	36190	28620			35900	No Proteins	Not Used	10840	0.003	0.0984	1395	1472	1.99	0	566500	3	708.027	2122.07	0	1.15	0.77	2963	2964	MS2	0/0	0	0	2ms21_2014_479_PFL_Fr1.mgf			25230	36190	28620
High	A	dIQMTQSPSSLSATVGDR	3198	Unambiguous		0	0		N-Term(TMT6plex)	CID	1	0	1	1053000	649200	846100	531600	640300	748700	No Proteins	Not Used	10843	0	4.38e-05	1289	1369	5.06	0	8397000	2	1061.54	2122.07	0	0.52	0.77	2970	2971	MS2	0/0	0	0	2ms21_2014_479_PFL_Fr1.mgf			1053000	649200	846100	531600	640300
High	A	vcEAGSGLVFScQDk	4394	Unambiguous		0	0		N-Term(TMT6plex); C2(Carbamidomethyl); C12(Carbamidomethyl); K15(TMT6plex)	CID	1	0	1							No Proteins	Not Used	10844	0	0.000716	1389	1370	3.02	0	885900	3	705.692	2115.06	0	0.49	0.77	2972	2973	MS2	0/0	0	0	2ms21_2014_479_PFL_Fr1.mgf
High	A	lTGSSGFVTDGPGNYk	4396	Unambiguous	cDNA FLJ58441, highly similar to Attractin OS=Homo sapiens PE=2 SV=1 - [B4DZ36_HUMAN]	4	1	B4DZ36	N-Term(TMT6plex); K16(TMT6plex)	CID	1	0	1							No Quan Values	Not Used	10845	0.001	0.0053	2191	2263	3.63	0	361100	3	686.701	2058.09	0	-1.28	0.77	2974	2975	MS2	0/0	0	0	2ms21_2014_479_PFL_Fr1.mgf
High	A	vcEAGSGLVFScQDk	4394	Unambiguous		0	0		N-Term(TMT6plex); C2(Carbamidomethyl); C12(Carbamidomethyl); K15(TMT6plex)	CID	1	0	1	2045000	1358000	1317000	2032000	1706000	1583000	No Proteins	Not Used	10846	0	1.11e-05	1404	1383	4.9	0	13750000	2	1058.04	2115.06	0	1.27	0.77	2977	2978	MS2	0/0	0	0	2ms21_2014_479_PFL_Fr1.mgf			2045000	1358000	1317000	2032000	1706000
High	A	lTGSSGFVTDGPGNYk	4396	Unambiguous	cDNA FLJ58441, highly similar to Attractin OS=Homo sapiens PE=2 SV=1 - [B4DZ36_HUMAN]	4	1	B4DZ36	N-Term(TMT6plex); K16(TMT6plex)	CID	1	0	1	418100	312100	367300	475700	435300	440200	Unique	Used	10847	0	0.000178	2274	2326	5.17	0	4466000	2	1029.55	2058.09	0	1.79	0.77	2979	2980	MS2	0/0	0	0	2ms21_2014_479_PFL_Fr1.mgf			418100	312100	367300	475700	435300
High	A	sPVGVQPILNEHTFcAGmSk	4431	Unambiguous	Haptoglobin OS=Homo sapiens GN=HP PE=1 SV=1 - [HPT_HUMAN]	3	1	P00738	N-Term(TMT6plex); C15(Carbamidomethyl); M18(Oxidation); K20(TMT6plex)	CID	1	0	1		2219000	491000	98150	203600	1769000	No Quan Values	Not Used	10853	0	0.000163	2735	2766	5.37	0	17510000	3	882.8	2646.38	0	2.13	0.77	2992	2993	MS2	0/0	0	0	2ms21_2014_479_PFL_Fr1.mgf				2219000	491000	98150	203600
High	A	eVVSLTEAccAEGADPDcYDTR	4448	Unambiguous	Vitamin D-binding protein OS=Homo sapiens GN=GC PE=1 SV=1 - [VTDB_HUMAN]	3	1	P02774	N-Term(TMT6plex); C9(Carbamidomethyl); C10(Carbamidomethyl); C18(Carbamidomethyl)	CID	1	0	1	47680	57310	33220	29380	47640	70580	Unique	Used	10859	0	0.000292	62	80	4.47	0	1621000	3	916.4	2747.18	0	1.71	0.77	3005	3006	MS2	0/0	0	0	2ms21_2014_479_PFL_Fr1.mgf			47680	57310	33220	29380	47640
High	A	qGFSYQcPQGQVIVAVR	4458	Unambiguous	Dermatopontin OS=Homo sapiens GN=DPT PE=2 SV=2 - [DERM_HUMAN]	1	1	Q07507	N-Term(TMT6plex); C7(Carbamidomethyl)	CID	1	0	1	1042000	852300	501500	1583000	651900	1108000	Unique	Used	10862	0	4.16e-05	2254	2201	5.74	0	10450000	2	1083.57	2166.13	0	0.93	0.77	3012	3013	MS2	0/0	0	0	2ms21_2014_479_PFL_Fr1.mgf			1042000	852300	501500	1583000	651900
High	A	eIVMTQSPATLSVSPGER	4471	Unambiguous		0	0		N-Term(TMT6plex)	CID	1	0	1	2097000	1439000	2160000	1693000	2240000	2141000	No Proteins	Not Used	10865	0	1.96e-05	2247	2237	6.44	0	23570000	2	1066.07	2131.14	0	4.36	0.77	3018	3019	MS2	0/0	0	0	2ms21_2014_479_PFL_Fr1.mgf			2097000	1439000	2160000	1693000	2240000
High	A	eIVMTQSPATLSVSPGER	4471	Unambiguous		0	0		N-Term(TMT6plex)	CID	1	0	1	371400	286900	265100	415300	449500	541100	No Proteins	Not Used	10866	0	0.000113	2155	2159	2.81	0	13100000	3	711.048	2131.13	0	1.67	0.77	3021	3022	MS2	0/0	0	0	2ms21_2014_479_PFL_Fr1.mgf			371400	286900	265100	415300	449500
High	A	vQEGYTcDcFDGYHLDTAk	4494	Unambiguous		0	0		N-Term(TMT6plex); C7(Carbamidomethyl); C9(Carbamidomethyl); K19(TMT6plex)	CID	1	0	1	47800	63040	80180	93860	47190	77120	No Proteins	Not Used	10870	0.001	0.0113	497	491	3.93	0	1772000	3	913.092	2737.26	0	-0.78	0.77	3029	3030	MS2	0/0	0	0	2ms21_2014_479_PFL_Fr1.mgf			47800	63040	80180	93860	47190
High	A	aSQSVSSSYLAWYQQkPGQAPR	4532	Unambiguous	Myosin-reactive immunoglobulin light chain variable region (Fragment) OS=Homo sapiens PE=2 SV=1 - [Q9UL78_HUMAN]	1	1	Q9UL78	N-Term(TMT6plex); K16(TMT6plex)	CID	1	0	1	193700	173500	154800	213200	194900	236100	Unique	Used	10880	0	0.000585	3612	3976	5.2	0	2860000	3	966.519	2897.54	0	3.52	0.78	3051	3052	MS2	0/0	0	0	2ms21_2014_479_PFL_Fr1.mgf			193700	173500	154800	213200	194900
High	A	eYIIQVAAk	4534	Unambiguous		0	0		N-Term(TMT6plex); K9(TMT6plex)	CID	1	0	1	6261000	3910000	2793000	4474000	2209000	4146000	No Proteins	Not Used	10881	0.001	0.0263	1541	1577	2.97	0	31350000	2	746.96	1492.91	0	-0.48	0.78	3054	3055	MS2	0/0	0	0	2ms21_2014_479_PFL_Fr1.mgf			6261000	3910000	2793000	4474000	2209000
High	A	gAcPVFEcGNVVLR	4538	Unambiguous	Isoform 2 of Hepatitis A virus cellular receptor 2 OS=Homo sapiens GN=HAVCR2 - [HAVR2_HUMAN]	3	1	Q8TDQ0-2	N-Term(TMT6plex); C3(Carbamidomethyl); C8(Carbamidomethyl)	CID	1	0	1	318400	475200	277100	327900	189600	512500	Unique	Used	10882	0	0.00067	1098	1161	3.7	0	8906000	3	602.976	1806.91	0	-2.72	0.78	3056	3057	MS2	0/0	0	0	2ms21_2014_479_PFL_Fr1.mgf			318400	475200	277100	327900	189600
High	A	gAcPVFEcGNVVLR	4538	Unambiguous	Isoform 2 of Hepatitis A virus cellular receptor 2 OS=Homo sapiens GN=HAVCR2 - [HAVR2_HUMAN]	3	1	Q8TDQ0-2	N-Term(TMT6plex); C3(Carbamidomethyl); C8(Carbamidomethyl)	CID	1	0	1	6581000	5284000	4953000	9372000	3688000	6781000	Unique	Used	10883	0	7.32e-05	1229	1280	4.23	0	60570000	2	903.964	1806.92	0	0.3	0.78	3058	3059	MS2	0/0	0	0	2ms21_2014_479_PFL_Fr1.mgf			6581000	5284000	4953000	9372000	3688000
High	A	qPGITFIAAk	4548	Unambiguous	Cathepsin D OS=Homo sapiens GN=CTSD PE=1 SV=1 - [CATD_HUMAN]	1	1	P07339	N-Term(TMT6plex); K10(TMT6plex)	CID	1	0	1	690400	627600	1971000	916100	582500	743100	Unique	Used	10885	0.001	0.00501	1587	1519	3.04	0	8341000	2	752.469	1503.93	0	0.25	0.78	3062	3063	MS2	0/0	0	0	2ms21_2014_479_PFL_Fr1.mgf			690400	627600	1971000	916100	582500
High	A	eLQVYISPk	4552	Unambiguous	Vascular cell adhesion protein 1 OS=Homo sapiens GN=VCAM1 PE=4 SV=1 - [E9PDD2_HUMAN]	4	1	E9PDD2	N-Term(TMT6plex); K9(TMT6plex)	CID	1	0	1	5572000	7456000	5669000	6947000	3171000	8160000	Unique	Used	10886	0.001	0.0121	1809	1879	3.6	0	49530000	2	767.966	1534.92	0	0.05	0.78	3065	3066	MS2	0/0	0	0	2ms21_2014_479_PFL_Fr1.mgf			5572000	7456000	5669000	6947000	3171000
High	A	vPLQQNFQDNQFQGk	4577	Unambiguous	Neutrophil gelatinase-associated lipocalin OS=Homo sapiens GN=LCN2 PE=1 SV=2 - [NGAL_HUMAN]	4	1	P80188	N-Term(TMT6plex); K15(TMT6plex)	CID	1	0	1	750300	719900	1008000	387700	515400	443500	Unique	Used	10893	0	4.78e-05	2725	2610	4.71	0	6204000	2	1125.11	2249.21	0	-0.61	0.78	3080	3081	MS2	0/0	0	0	2ms21_2014_479_PFL_Fr1.mgf			750300	719900	1008000	387700	515400
Middle	A	vQNPYSHGNIVk	4586	Unambiguous		0	0		N-Term(TMT6plex); K12(TMT6plex)	CID	1	0	1	32060	39740	26990	8917	44690	51960	No Proteins	Not Used	10895	0.034	0.509	2068	1959	1.57	0	312400	3	605.349	1814.03	0	0.16	0.78	3084	3085	MS2	0/0	0	0	2ms21_2014_479_PFL_Fr1.mgf			32060	39740	26990	8917	44690
High	A	gEcVPGEQEPEPILIPR	4588	Unambiguous	Protein AMBP OS=Homo sapiens GN=AMBP PE=1 SV=1 - [AMBP_HUMAN]	1	1	P02760	N-Term(TMT6plex); C3(Carbamidomethyl)	CID	1	0	1	949300	608700	604000	1262000	651400	665600	Unique	Used	10896	0	0.000403	1922	2049	4.51	0	9988000	2	1075.06	2149.12	0	1.29	0.78	3087	3088	MS2	0/0	0	0	2ms21_2014_479_PFL_Fr1.mgf			949300	608700	604000	1262000	651400
High	A	cYYFSVEk	4600	Unambiguous		0	0		N-Term(TMT6plex); C1(Carbamidomethyl); K8(TMT6plex)	CID	1	0	1	235000	173300	328700	188400	229100	208000	No Proteins	Not Used	10899	0.001	0.0213	1017	1012	3.45	0	2727000	2	777.408	1553.81	0	0.77	0.78	3093	3094	MS2	0/0	0	0	2ms21_2014_479_PFL_Fr1.mgf			235000	173300	328700	188400	229100
High	A	nWGLSVYADkPETTk	4606	Unambiguous	Alpha-1-acid glycoprotein 1 OS=Homo sapiens GN=ORM1 PE=1 SV=1 - [A1AG1_HUMAN]	1	1	P02763	N-Term(TMT6plex); K10(TMT6plex); K15(TMT6plex)	CID	1	0	1	1206000	9816000	5051000	2261000	6974000	10530000	Unique	Used	10900	0	0.000145	2911	2690	3.34	0	60830000	3	799.454	2396.35	0	2.24	0.78	3095	3096	MS2	0/0	0	0	2ms21_2014_479_PFL_Fr1.mgf			1206000	9816000	5051000	2261000	6974000
High	A	lAAcLEGNcAEGLGTNYR	4616	Unambiguous	Thrombin light chain (Fragment) OS=Homo sapiens GN=F2 PE=4 SV=1 - [C9JV37_HUMAN]	3	1	C9JV37	N-Term(TMT6plex); C4(Carbamidomethyl); C9(Carbamidomethyl)	CID	1	0	1		117300					No Quan Values	Not Used	10903	0	6.76e-07	749	725	5.41	0	10680000	3	733.356	2198.05	0	0.03	0.78	3102	3103	MS2	0/0	0	0	2ms21_2014_479_PFL_Fr1.mgf				117300
High	A	aAQGLLAcGVAQGALR	4618	Unambiguous		0	0		N-Term(TMT6plex); C8(Carbamidomethyl)	CID	1	0	1	13620000	5371000	5418000	5269000	5138000	5859000	No Proteins	Not Used	10904	0	2.26e-05	1915	1963	5.14	0	58970000	2	893.004	1785	0	-0.1	0.78	3104	3105	MS2	0/0	0	0	2ms21_2014_479_PFL_Fr1.mgf			13620000	5371000	5418000	5269000	5138000
High	A	lAAcLEGNcAEGLGTNYR	4616	Unambiguous	Thrombin light chain (Fragment) OS=Homo sapiens GN=F2 PE=4 SV=1 - [C9JV37_HUMAN]	3	1	C9JV37	N-Term(TMT6plex); C4(Carbamidomethyl); C9(Carbamidomethyl)	CID	1	0	1	842600	765600	902100	1394000	919600	803600	Unique	Used	10905	0	5.64e-06	748	739	5.67	0	10860000	2	1099.53	2198.05	0	-0.65	0.78	3106	3107	MS2	0/0	0	0	2ms21_2014_479_PFL_Fr1.mgf			842600	765600	902100	1394000	919600
High	A	fSGSGSGTDFTLk	4645	Unambiguous		0	0		N-Term(TMT6plex); K13(TMT6plex)	CID	1	0	1	2229000	2222000	2195000	1365000	1747000	3391000	No Proteins	Not Used	10911	0	3.12e-05	1754	1817	3.75	0	16720000	2	881.475	1761.94	0	-0.12	0.78	3120	3121	MS2	0/0	0	0	2ms21_2014_479_PFL_Fr1.mgf			2229000	2222000	2195000	1365000	1747000
High	A	eGQMESVEAAMSSk	4651	Unambiguous	Thyroxine-binding globulin OS=Homo sapiens GN=SERPINA7 PE=1 SV=2 - [THBG_HUMAN]	1	1	P05543	N-Term(TMT6plex); K14(TMT6plex)	CID	1	0	1	2712000	2130000	1949000	2901000	2799000	3090000	Unique	Used	10913	0	1.26e-05	1135	1093	2.41	0	24980000	2	971.49	1941.97	0	3.32	0.78	3124	3125	MS2	0/0	0	0	2ms21_2014_479_PFL_Fr1.mgf			2712000	2130000	1949000	2901000	2799000
High	A	lAAcLEGNcAEGLGTNYR	4616	Unambiguous	Thrombin light chain (Fragment) OS=Homo sapiens GN=F2 PE=4 SV=1 - [C9JV37_HUMAN]	3	1	C9JV37	N-Term(TMT6plex); C4(Carbamidomethyl); C9(Carbamidomethyl)	CID	1	0	1	2241000	2100000	2816000	4241000	2859000	2223000	Unique	Used	10915	0	5.64e-06	764	749	5.1	0	29330000	2	1099.53	2198.05	0	0.68	0.78	3128	3129	MS2	0/0	0	0	2ms21_2014_479_PFL_Fr1.mgf			2241000	2100000	2816000	4241000	2859000
High	A	lSEPAELTDAVk	4665	Unambiguous		0	0		N-Term(TMT6plex); K12(TMT6plex)	CID	1	0	1	1698000	1328000	718100	1059000	2318000	456400	No Proteins	Not Used	10916	0	0.000402	2422	2380	4.07	0	9962000	2	866	1730.99	0	-0.3	0.78	3131	3132	MS2	0/0	0	0	2ms21_2014_479_PFL_Fr1.mgf			1698000	1328000	718100	1059000	2318000
High	A	dWVSVVTPAR	4669	Unambiguous	cDNA FLJ38724 fis, clone KIDNE2010151, highly similar to UROMODULIN OS=Homo sapiens PE=2 SV=1 - [B3KTU0_HUMAN]	8	1	B3KTU0	N-Term(TMT6plex)	CID	1	0	1	620700	585500	174300	830000	795400	407300	Unique	Used	10917	0.002	0.0876	1218	1262	1.93	0	4000000	2	679.885	1358.76	0	0.33	0.78	3133	3134	MS2	0/0	0	0	2ms21_2014_479_PFL_Fr1.mgf			620700	585500	174300	830000	795400
High	A	scAVAEYGVYVk	4093	Unambiguous	Haptoglobin OS=Homo sapiens GN=HP PE=1 SV=1 - [HPT_HUMAN]	3	1	P00738	N-Term(TMT6plex); C2(Carbamidomethyl); K12(TMT6plex)	CID	1	0	1	96310	810300	235200	81430	119800	765500	Unique	Used	10926	0	0.000391	2256	2196	5.32	0	3220000	2	902.494	1803.98	0	5.37	0.8	3153	3154	MS2	0/0	0	0	2ms21_2014_479_PFL_Fr1.mgf			96310	810300	235200	81430	119800
High	A	aAAVSEAEADFYEQNSR	4747	Unambiguous	Alpha-N-acetylglucosaminidase OS=Homo sapiens GN=ufHSD2 PE=4 SV=1 - [Q14769_HUMAN]	2	1	Q14769	N-Term(TMT6plex)	CID	1	0	1							No Quan Values	Not Used	10936	0.007	0.189	424	416	1.86	0	672800	3	696.331	2086.98	0	-4.66	0.8	3175	3176	MS2	0/0	0	0	2ms21_2014_479_PFL_Fr1.mgf
High	A	aAAVSEAEADFYEQNSR	4747	Unambiguous	Alpha-N-acetylglucosaminidase OS=Homo sapiens GN=ufHSD2 PE=4 SV=1 - [Q14769_HUMAN]	2	1	Q14769	N-Term(TMT6plex)	CID	1	0	1	638400	398000	576900	278800	408000	455900	Unique	Used	10937	0	3.68e-05	541	553	5.76	0	5514000	2	1044	2086.99	0	0.99	0.8	3177	3178	MS2	0/0	0	0	2ms21_2014_479_PFL_Fr1.mgf			638400	398000	576900	278800	408000
High	A	gSIQVDGEELVSGR	4170	Unambiguous	Heparan sulfate proteoglycan 2 (Perlecan), isoform CRA_b OS=Homo sapiens GN=HSPG2 PE=4 SV=1 - [A0A024RAB6_HUMAN]	3	1	A0A024RAB6	N-Term(TMT6plex)	CID	1	0	1	829800	414100	430500	888600	441500	469200	Unique	Used	10940	0	0.000198	1451	1424	4.63	0	5225000	2	837.95	1674.89	0	3.55	0.8	3183	3184	MS2	0/0	0	0	2ms21_2014_479_PFL_Fr1.mgf			829800	414100	430500	888600	441500
High	A	dLEcVTNLQEVAR	4767	Unambiguous		0	0		N-Term(TMT6plex); C4(Carbamidomethyl)	CID	1	0	1	1456000	1556000	2419000	2314000	1640000	2019000	No Proteins	Not Used	10941	0.001	0.00341	1177	1243	4.36	0	17280000	2	888.46	1775.91	0	-1.4	0.8	3186	3187	MS2	0/0	0	0	2ms21_2014_479_PFL_Fr1.mgf			1456000	1556000	2419000	2314000	1640000
Middle	A	aHGQESAIFNEVAPGY	4779	Unambiguous		0	0		N-Term(TMT6plex)	CID	1	0	1	48710	56500	42850	60210	40740	79760	No Proteins	Not Used	10944	0.02	0.376	750	705	1.16	0	523400	3	640.319	1918.94	0	-3.84	0.8	3192	3193	MS2	0/0	0	0	2ms21_2014_479_PFL_Fr1.mgf			48710	56500	42850	60210	40740
High	A	sDVMYTDWk	3780	Unambiguous	Alpha-1-acid glycoprotein 2 OS=Homo sapiens GN=ORM2 PE=1 SV=2 - [A1AG2_HUMAN]	1	1	P19652	N-Term(TMT6plex); K9(TMT6plex)	CID	1	0	1	767200	2482000	1541000	987800	1739000	2618000	Unique	Used	10947	0.001	0.0121	934	943	2.87	0	13290000	2	801.916	1602.82	0	0.19	0.8	3199	3200	MS2	0/0	0	0	2ms21_2014_479_PFL_Fr1.mgf			767200	2482000	1541000	987800	1739000
High	A	aQLDAAVTFGPSQVAR	4833	Unambiguous	Isoform 2 of Arylsulfatase A OS=Homo sapiens GN=ARSA - [ARSA_HUMAN]	4	1	P15289-2	N-Term(TMT6plex)	CID	1	0	1	629800	579800	1308000	692800	423400	639500	Unique	Used	10957	0	0.000234	2406	2266	4.28	0	6715000	2	930.512	1860.02	0	-0.47	0.8	3221	3222	MS2	0/0	0	0	2ms21_2014_479_PFL_Fr1.mgf			629800	579800	1308000	692800	423400
High	A	tmLLQPAGSLGSYSYR	4743	Unambiguous	Prostaglandin-H2 D-isomerase OS=Homo sapiens GN=PTGDS PE=1 SV=1 - [PTGDS_HUMAN]	4	1	P41222	N-Term(TMT6plex); M2(Oxidation)	CID	1	0	1	6841000	6324000	5103000	6703000	4457000	7070000	Unique	Used	10965	0.001	0.00846	1742	1653	2.48	0	71020000	2	995.021	1989.03	0	1.21	0.8	3239	3240	MS2	0/0	0	0	2ms21_2014_479_PFL_Fr1.mgf			6841000	6324000	5103000	6703000	4457000
High	A	lSLSQLNSNPELR	4870	Unambiguous	Isoform 5 of Prominin-1 OS=Homo sapiens GN=PROM1 - [PROM1_HUMAN]	9	1	O43490-5	N-Term(TMT6plex)	CID	1	0	1	107100	137400	113500	93710	115100	137200	Unique	Used	10966	0.001	0.00986	1805	1822	3.98	0	1437000	2	850.478	1699.95	0	-3.55	0.8	3241	3242	MS2	0/0	0	0	2ms21_2014_479_PFL_Fr1.mgf			107100	137400	113500	93710	115100
High	A	eENFYVDETTVVk	4888	Unambiguous		0	0		N-Term(TMT6plex); K13(TMT6plex)	CID	1	0	1	280400	536500	375400	292700	977600	670300	No Proteins	Not Used	10970	0	0.00127	2084	2192	4.72	0	4449000	2	1016.04	2031.08	0	4.36	0.8	3250	3251	MS2	0/0	0	0	2ms21_2014_479_PFL_Fr1.mgf			280400	536500	375400	292700	977600
High	A	iVLQLk	4892	Unambiguous	Carboxypeptidase Q OS=Homo sapiens GN=CPQ PE=1 SV=1 - [CBPQ_HUMAN]	2	1	Q9Y646	N-Term(TMT6plex); K6(TMT6plex)	CID	1	0	1	128000	123300	123000	148100	100700	148800	Unique	Used	10971	0.002	0.0675	241	210	2.55	0	985000	2	586.413	1171.82	0	0.55	0.82	3252	3253	MS2	0/0	0	0	2ms21_2014_479_PFL_Fr1.mgf			128000	123300	123000	148100	100700
High	A	xVLQLk	4892	Unambiguous	Carboxypeptidase Q OS=Homo sapiens GN=CPQ PE=1 SV=1 - [CBPQ_HUMAN]	2	1	Q9Y646	N-Term(TMT6plex); X1(L); K6(TMT6plex)	CID	1	0	1	128000	123300	123000	148100	100700	148800	Redundant	Not Used	10971	0.002	0.0675	241	210	2.55	0	985000	2	586.413	1171.82	0	0.55	0.82	3252	3253	MS2	0/0	0	0	2ms21_2014_479_PFL_Fr1.mgf			128000	123300	123000	148100	100700
High	A	lVIQLk	4892	Unambiguous	Carboxypeptidase Q OS=Homo sapiens GN=CPQ PE=1 SV=1 - [CBPQ_HUMAN]	2	1	Q9Y646	N-Term(TMT6plex); K6(TMT6plex)	CID	1	0	1	128000	123300	123000	148100	100700	148800	Redundant	Not Used	10971	0.002	0.0675	241	210	2.55	0	985000	2	586.413	1171.82	0	0.55	0.82	3252	3253	MS2	0/0	0	0	2ms21_2014_479_PFL_Fr1.mgf			128000	123300	123000	148100	100700
High	A	iVIQLk	4892	Unambiguous	Carboxypeptidase Q OS=Homo sapiens GN=CPQ PE=1 SV=1 - [CBPQ_HUMAN]	2	1	Q9Y646	N-Term(TMT6plex); K6(TMT6plex)	CID	1	0	1	128000	123300	123000	148100	100700	148800	Redundant	Not Used	10971	0.002	0.0675	241	210	2.55	0	985000	2	586.413	1171.82	0	0.55	0.82	3252	3253	MS2	0/0	0	0	2ms21_2014_479_PFL_Fr1.mgf			128000	123300	123000	148100	100700
High	A	eTLLQDFR	4951	Unambiguous	Protein AMBP OS=Homo sapiens GN=AMBP PE=1 SV=1 - [AMBP_HUMAN]	1	1	P02760	N-Term(TMT6plex)	CID	1	0	1	1484000	1305000	1205000	1952000	1085000	1660000	Unique	Used	10985	0.002	0.079	1231	1239	2.4	0	13870000	2	625.851	1250.69	0	-0.29	0.82	3283	3284	MS2	0/0	0	0	2ms21_2014_479_PFL_Fr1.mgf			1484000	1305000	1205000	1952000	1085000
Middle	A	gVTFLLR	4979	Unambiguous	Alpha-1B-glycoprotein OS=Homo sapiens GN=A1BG PE=1 SV=4 - [A1BG_HUMAN]	1	1	P04217	N-Term(TMT6plex)	CID	1	0	1	433600	1172000	469300	95380	941700	1596000	Unique	Used	10991	0.015	0.294	371	364	1.93	0	6741000	2	517.831	1034.65	0	-2.09	0.82	3296	3297	MS2	0/0	0	0	2ms21_2014_479_PFL_Fr1.mgf			433600	1172000	469300	95380	941700
High	A	iASFSQNcDIYPGk	4404	Unambiguous	cDNA FLJ53075, highly similar to Kininogen-1 OS=Homo sapiens PE=2 SV=1 - [B4DPP8_HUMAN]	6	1	B4DPP8	N-Term(TMT6plex); C8(Carbamidomethyl); K14(TMT6plex)	CID	1	0	1	3878000	1772000	1516000	4538000	3301000	2108000	Unique	Used	10995	0	0.000261	1973	2091	4.06	0	25470000	2	1029.54	2058.08	0	1.28	0.82	3305	3306	MS2	0/0	0	0	2ms21_2014_479_PFL_Fr1.mgf			3878000	1772000	1516000	4538000	3301000
High	A	tcVDINEcLLEPR	5009	Unambiguous	Fibrillin 1 variant (Fragment) OS=Homo sapiens PE=2 SV=1 - [Q59HB9_HUMAN]	4	1	Q59HB9	N-Term(TMT6plex); C2(Carbamidomethyl); C8(Carbamidomethyl)	CID	1	0	1	1783000	1757000	1524000	2132000	1527000	1828000	Unique	Used	10999	0	0.000285	878	783	3.72	0	16510000	2	924.463	1847.92	0	-0.73	0.82	3313	3314	MS2	0/0	0	0	2ms21_2014_479_PFL_Fr1.mgf			1783000	1757000	1524000	2132000	1527000
High	A	qNLLAPQNAVSSEETNDFk	5019	Unambiguous	Isoform D of Osteopontin OS=Homo sapiens GN=SPP1 - [OSTP_HUMAN]	4	1	P10451-4	N-Term(TMT6plex); K19(TMT6plex)	CID	1	0	1	226800	216100	288600	279800	266500	265800	Unique	Used	11001	0	0.000167	2751	2675	3.6	0	3057000	3	855.12	2563.35	0	1.92	0.82	3318	3319	MS2	0/0	0	0	2ms21_2014_479_PFL_Fr1.mgf			226800	216100	288600	279800	266500
High	A	lTEPADTITDAVk	5027	Unambiguous		0	0		N-Term(TMT6plex); K13(TMT6plex)	CID	1	0	1	1710000	934600	1196000	2665000	1541000	1213000	No Proteins	Not Used	11003	0	0.00113	2785	2806	2.51	0	19740000	3	611.352	1832.04	0	-0.4	0.82	3322	3323	MS2	0/0	0	0	2ms21_2014_479_PFL_Fr1.mgf			1710000	934600	1196000	2665000	1541000
High	A	lTEPADTITDAVk	5027	Unambiguous		0	0		N-Term(TMT6plex); K13(TMT6plex)	CID	1	0	1	23560000	11380000	12670000	38020000	19420000	14740000	No Proteins	Not Used	11005	0	0.000839	2764	2790	3.59	0	158000000	2	916.524	1832.04	0	-0.73	0.82	3327	3328	MS2	0/0	0	0	2ms21_2014_479_PFL_Fr1.mgf			23560000	11380000	12670000	38020000	19420000
High	A	lTEPADTITDAVk	5027	Unambiguous		0	0		N-Term(TMT6plex); K13(TMT6plex)	CID	1	0	1	21210000	10610000	11240000	33390000	16330000	12760000	No Proteins	Not Used	11013	0	2.14e-05	2798	2826	3.09	0	134600000	2	916.524	1832.04	0	-0.33	0.82	3344	3345	MS2	0/0	0	0	2ms21_2014_479_PFL_Fr1.mgf			21210000	10610000	11240000	33390000	16330000
High	A	sVDIWLR	5088	Unambiguous	cDNA FLJ36858 fis, clone ASTRO2015185, highly similar to POLIOVIRUS RECEPTOR OS=Homo sapiens PE=2 SV=1 - [B3KSS4_HUMAN]	6	1	B3KSS4	N-Term(TMT6plex)	CID	1	0	1	914200	643300	542100	919100	810400	659700	Unique	Used	11018	0.004	0.121	1403	1418	2.13	0	5640000	2	559.332	1117.66	0	0.79	0.82	3355	3356	MS2	0/0	0	0	2ms21_2014_479_PFL_Fr1.mgf			914200	643300	542100	919100	810400
High	A	dVPcEDkFSFVck	5102	Unambiguous	cDNA FLJ75763, highly similar to Homo sapiens regenerating islet-derived 1 alpha (pancreatic stone protein, pancreatic thread protein) (REG1A), mRNA OS=Homo sapiens PE=2 SV=1 - [A8K7G6_HUMAN]	2	1	A8K7G6	N-Term(TMT6plex); C4(Carbamidomethyl); K7(TMT6plex); C12(Carbamidomethyl); K13(TMT6plex)	CID	1	0	1	764000	398700	682300	502200	278800	351800	Unique	Used	11021	0.002	0.0575	2252	2159	2.98	1	5481000	3	773.409	2318.21	0	-0.03	0.83	3362	3363	MS2	0/0	0	0	2ms21_2014_479_PFL_Fr1.mgf			764000	398700	682300	502200	278800
High	A	qTALVELVk	5135	Unambiguous	Albumin (Fragment) OS=Homo sapiens PE=2 SV=1 - [F6KPG5_HUMAN]	6	1	F6KPG5	N-Term(TMT6plex); K9(TMT6plex)	CID	1	0	1	95570	205300	163300	85490	172900	127800	Unique	Used	11029	0.002	0.0706	1104	1110	3.79	0	2350000	2	729.975	1458.94	0.01	8.85	0.83	3379	3380	MS2	0/0	0	0	2ms21_2014_479_PFL_Fr1.mgf			95570	205300	163300	85490	172900
Middle	A	ccFHcQVcFIxk	4076	Unconsidered		0	0		N-Term(TMT6plex); C1(Carbamidomethyl); C2(Carbamidomethyl); C5(Carbamidomethyl); C8(Carbamidomethyl); X11(L); K12(TMT6plex)	CID	1	0	1	746800	691500	457600	1097000	492500	701100	No Proteins	Not Used	11031	0.016	0.303	1214	1216	2.37	0	8066000	2	1065.53	2130.06	0	1.77	0.83	3384	3385	MS2	0/0	0	0	2ms21_2014_479_PFL_Fr1.mgf			746800	691500	457600	1097000	492500
Middle	A	ccFHcQVcFxxk	4076	Unconsidered		0	0		N-Term(TMT6plex); C1(Carbamidomethyl); C2(Carbamidomethyl); C5(Carbamidomethyl); C8(Carbamidomethyl); X10(L); X11(L); K12(TMT6plex)	CID	1	0	1	746800	691500	457600	1097000	492500	701100	No Proteins	Not Used	11031	0.016	0.303	1214	1216	2.37	0	8066000	2	1065.53	2130.06	0	1.77	0.83	3384	3385	MS2	0/0	0	0	2ms21_2014_479_PFL_Fr1.mgf			746800	691500	457600	1097000	492500
High	A	dASGVTFTWTPSSGk	5149	Unambiguous	Ig alpha-1 chain C region OS=Homo sapiens GN=IGHA1 PE=1 SV=2 - [IGHA1_HUMAN]	9	1	P01876	N-Term(TMT6plex); K15(TMT6plex)	CID	1	0	1	873500	1445000	1562000	470800	1595000	1913000	Unique	Used	11033	0	3.16e-05	1997	2100	4.61	0	12050000	2	1000.03	1999.06	0	3.12	0.83	3388	3389	MS2	0/0	0	0	2ms21_2014_479_PFL_Fr1.mgf			873500	1445000	1562000	470800	1595000
High	A	dVSQSSISFQIEk	5153	Unambiguous	cDNA FLJ78262, highly similar to Homo sapiens semenogelin II (SEMG2), mRNA OS=Homo sapiens PE=2 SV=1 - [A8K6Z6_HUMAN]	4	1	A8K6Z6	N-Term(TMT6plex); K13(TMT6plex)	CID	1	0	1	175800	628100	302900	147900	101500	141900	Unique	Used	11034	0	0.000158	2015	2039	5.4	0	2453000	2	963.532	1926.06	0	-0.68	0.83	3390	3391	MS2	0/0	0	0	2ms21_2014_479_PFL_Fr1.mgf			175800	628100	302900	147900	101500
Middle	A	dASGVTFTWTPSSGk	5149	Unambiguous	Ig alpha-1 chain C region OS=Homo sapiens GN=IGHA1 PE=1 SV=2 - [IGHA1_HUMAN]	9	1	P01876	N-Term(TMT6plex); K15(TMT6plex)	CID	1	0	1	142100	148900	140600	177700	117000	200500	Unique	Used	11035	0.013	0.247	1935	2047	2.78	0	1954000	3	667.022	1999.05	0	-0.64	0.83	3393	3394	MS2	0/0	0	0	2ms21_2014_479_PFL_Fr1.mgf			142100	148900	140600	177700	117000
High	A	dSDIIEDVmVk	5165	Unambiguous	Endonuclease domain-containing 1 protein OS=Homo sapiens GN=ENDOD1 PE=1 SV=2 - [ENDD1_HUMAN]	1	1	O94919	N-Term(TMT6plex); M9(Oxidation); K11(TMT6plex)	CID	1	0	1	1091000	1248000	956300	1173000	810700	1463000	Unique	Used	11037	0.001	0.00491	1775	1691	3.27	0	9932000	2	869.472	1737.94	0	1.3	0.83	3397	3398	MS2	0/0	0	0	2ms21_2014_479_PFL_Fr1.mgf			1091000	1248000	956300	1173000	810700
High	A	dSDIIEDVmVk	5165	Unambiguous	Endonuclease domain-containing 1 protein OS=Homo sapiens GN=ENDOD1 PE=1 SV=2 - [ENDD1_HUMAN]	1	1	O94919	N-Term(TMT6plex); M9(Oxidation); K11(TMT6plex)	CID	1	0	1	14350	15390	8587	18340	17190	18450	Unique	Used	11039	0.002	0.065	1681	1613	3.12	0	294300	3	579.983	1737.93	0	-0.64	0.83	3401	3402	MS2	0/0	0	0	2ms21_2014_479_PFL_Fr1.mgf			14350	15390	8587	18340	17190
High	A	lcMGSGLNLcEPNNk	3776	Unambiguous	Transferrin variant (Fragment) OS=Homo sapiens PE=2 SV=1 - [Q53H26_HUMAN]	6	1	Q53H26	N-Term(TMT6plex); C2(Carbamidomethyl); C10(Carbamidomethyl); K15(TMT6plex)	CID	1	0	1	1316000	32880000	13080000	620200	27570000	25920000	Unique	Used	11040	0	3.7e-05	1446	1501	4.37	0	137800000	2	1083.05	2165.09	0	1.14	0.83	3404	3405	MS2	0/0	0	0	2ms21_2014_479_PFL_Fr1.mgf			1316000	32880000	13080000	620200	27570000
High	A	gQELcADYSENTFTEYk	5191	Unambiguous	Vitamin D-binding protein OS=Homo sapiens GN=GC PE=1 SV=1 - [VTDB_HUMAN]	3	1	P02774	N-Term(TMT6plex); C5(Carbamidomethyl); K17(TMT6plex)	CID	1	0	1	129700	1103000	276600	281400	241800	500800	Unique	Used	11044	0	0.0019	1093	1060	5.41	0	4615000	2	1257.11	2513.22	0.01	11.18	0.83	3412	3413	MS2	0/0	0	0	2ms21_2014_479_PFL_Fr1.mgf			129700	1103000	276600	281400	241800
High	A	lccQmcEPGTFLVk	5200	Unambiguous		0	0		N-Term(TMT6plex); C2(Carbamidomethyl); C3(Carbamidomethyl); M5(Oxidation); C6(Carbamidomethyl); K14(TMT6plex)	CID	1	0	1	738900	468400	567200	446000	478700	593200	No Proteins	Not Used	11046	0	0.000181	1194	1150	3.29	0	5284000	2	1109.05	2217.1	0	1.94	0.83	3417	3418	MS2	0/0	0	0	2ms21_2014_479_PFL_Fr1.mgf			738900	468400	567200	446000	478700
High	A	yPNDGDIVWGk	5205	Unambiguous	Maltase-glucoamylase, intestinal OS=Homo sapiens GN=MGAM PE=3 SV=2 - [E7ER45_HUMAN]	3	1	E7ER45	N-Term(TMT6plex); K11(TMT6plex)	CID	1	0	1	809200	585300	914000	922600	722300	540700	Unique	Used	11047	0.002	0.0583	1659	1602	3.07	0	6037000	2	861.461	1721.92	-0.01	-6.4	0.83	3419	3420	MS2	0/0	0	0	2ms21_2014_479_PFL_Fr1.mgf			809200	585300	914000	922600	722300
High	A	lcMGSGLNLcEPNNk	3776	Unambiguous	Transferrin variant (Fragment) OS=Homo sapiens PE=2 SV=1 - [Q53H26_HUMAN]	6	1	Q53H26	N-Term(TMT6plex); C2(Carbamidomethyl); C10(Carbamidomethyl); K15(TMT6plex)	CID	1	0	1	285500	6123000	2207000	62940	5683000	5328000	Unique	Used	11055	0	1.16e-05	1452	1491	4.14	0	51890000	3	722.369	2165.09	0	0.82	0.83	3437	3438	MS2	0/0	0	0	2ms21_2014_479_PFL_Fr1.mgf			285500	6123000	2207000	62940	5683000
High	A	yAQTPANmFYIVAcDNR	5247	Unambiguous		0	0		N-Term(TMT6plex); M8(Oxidation); C14(Carbamidomethyl)	CID	1	0	1	368300	260600	266600	492600	321600	391100	No Proteins	Not Used	11059	0.001	0.0258	756	723	2.69	0	14290000	2	1140.05	2279.08	0	1.8	0.83	3445	3446	MS2	0/0	0	0	2ms21_2014_479_PFL_Fr1.mgf			368300	260600	266600	492600	321600
High	A	sASDLTWDNLk	5251	Unambiguous	Transferrin variant (Fragment) OS=Homo sapiens PE=2 SV=1 - [Q53H26_HUMAN]	6	1	Q53H26	N-Term(TMT6plex); K11(TMT6plex)	CID	1	0	1	35620	935700	398400	14320	753000	711500	Unique	Used	11060	0.002	0.0649	1762	1788	1.77	0	4183000	3	569.982	1707.93	0	-0.98	0.83	3448	3449	MS2	0/0	0	0	2ms21_2014_479_PFL_Fr1.mgf			35620	935700	398400	14320	753000
High	A	lccQmcEPGTFLVk	5200	Unambiguous		0	0		N-Term(TMT6plex); C2(Carbamidomethyl); C3(Carbamidomethyl); M5(Oxidation); C6(Carbamidomethyl); K14(TMT6plex)	CID	1	0	1	17920				24690		No Proteins	Not Used	11061	0.002	0.0334	1064	1011	2.94	0	2031000	3	739.701	2217.09	0	-2.5	0.83	3450	3451	MS2	0/0	0	0	2ms21_2014_479_PFL_Fr1.mgf			17920				24690
High	A	lcMGSGLNLcEPNNk	3776	Unambiguous	Transferrin variant (Fragment) OS=Homo sapiens PE=2 SV=1 - [Q53H26_HUMAN]	6	1	Q53H26	N-Term(TMT6plex); C2(Carbamidomethyl); C10(Carbamidomethyl); K15(TMT6plex)	CID	1	0	1	252300	2991000	1286000	154400	2546000	2452000	Unique	Used	11065	0	4.16e-05	1439	1482	4.32	0	13830000	2	1083.05	2165.09	0	-0.33	0.83	3459	3460	MS2	0/0	0	0	2ms21_2014_479_PFL_Fr1.mgf			252300	2991000	1286000	154400	2546000
High	A	dSTYSLSSTLTLSk	4222	Unambiguous	Epididymis luminal protein 213 OS=Homo sapiens GN=HEL-213 PE=2 SV=1 - [V9HW34_HUMAN]|Protein IGKV3-11 OS=Homo sapiens GN=IGKV3-11 PE=4 SV=1 - [A0A087WZW8_HUMAN]	16	2	V9HW34;A0A087WZW8	N-Term(TMT6plex); K14(TMT6plex)	CID	1	0	1	999400	642400	904200	559300	645100	1084000	Not Unique	Not Used	11067	0	0.000524	2531	2505	5.03	0	6801000	2	981.049	1961.09	0	3.08	0.83	3463	3464	MS2	0/0	0	0	2ms21_2014_479_PFL_Fr1.mgf			999400	642400	904200	559300	645100
Middle	A	nPDEDPRGPWcYVSGEAGVPEk	5282	Unambiguous	Phosphoinositide-3-kinase-interacting protein 1 (Fragment) OS=Homo sapiens GN=PIK3IP1 PE=4 SV=3 - [C9JMK5_HUMAN]	4	1	C9JMK5	N-Term(TMT6plex); C11(Carbamidomethyl); K22(TMT6plex)	CID	1	0	1	276600	255200	319600	309000	279900	379200	Unique	Used	11068	0.014	0.273	1340	1470	2.39	1	5381000	3	973.144	2917.42	0	-0.12	0.83	3465	3466	MS2	0/0	0	0	2ms21_2014_479_PFL_Fr1.mgf			276600	255200	319600	309000	279900
Middle	A	lTVmTDLEDkNEWk	5284	Unambiguous	Vesicular integral-membrane protein VIP36 (Fragment) OS=Homo sapiens GN=LMAN2 PE=1 SV=3 - [D6RIU4_HUMAN]	6	1	D6RIU4	N-Term(TMT6plex); M4(Oxidation); K10(TMT6plex); K14(TMT6plex)	CID	1	0	1	476400	328700	242100	393900	243800	379000	Unique	Used	11069	0.012	0.215	3389	3243	2.19	1	4216000	3	809.115	2425.33	0	2.13	0.83	3467	3468	MS2	0/0	0	0	2ms21_2014_479_PFL_Fr1.mgf			476400	328700	242100	393900	243800
High	A	vDLVLEk	5286	Unambiguous	Ganglioside GM2 activator OS=Homo sapiens GN=GM2A PE=1 SV=4 - [SAP3_HUMAN]	1	1	P17900	N-Term(TMT6plex); K7(TMT6plex)	CID	1	0	1	4950000	4701000	4635000	7244000	2420000	9129000	Unique	Used	11070	0.002	0.0871	1188	1141	2.64	0	40370000	2	637.411	1273.81	0	1.11	0.83	3470	3471	MS2	0/0	0	0	2ms21_2014_479_PFL_Fr1.mgf			4950000	4701000	4635000	7244000	2420000
High	A	yGGDEIPFSPYR	5294	Unambiguous	FLJ00119 protein (Fragment) OS=Homo sapiens GN=FLJ00119 PE=2 SV=1 - [Q8TES4_HUMAN]	8	1	Q8TES4	N-Term(TMT6plex)	CID	1	0	1	1151000	1029000	880800	1474000	1004000	1211000	Unique	Used	11072	0.005	0.163	519	499	3.49	0	9541000	2	815.402	1629.8	-0.01	-8.24	0.83	3474	3475	MS2	0/0	0	0	2ms21_2014_479_PFL_Fr1.mgf			1151000	1029000	880800	1474000	1004000
High	A	aQGFTEDTIVFLPQTDk	5298	Unambiguous	Prostaglandin-H2 D-isomerase OS=Homo sapiens GN=PTGDS PE=1 SV=1 - [PTGDS_HUMAN]	2	1	P41222	N-Term(TMT6plex); K17(TMT6plex)	CID	1	0	1	31490	68450	44410	38860	20830	54560	Unique	Used	11073	0.001	0.0313	2989	3024	2.35	0	1953000	3	790.101	2368.29	0	3.99	0.85	3476	3477	MS2	0/0	0	0	2ms21_2014_479_PFL_Fr1.mgf			31490	68450	44410	38860	20830
High	A	eVQVFEITENSAk	5361	Unambiguous	Collagen alpha-3(VI) chain OS=Homo sapiens GN=COL6A3 PE=4 SV=2 - [E7ENL6_HUMAN]	5	1	E7ENL6	N-Term(TMT6plex); K13(TMT6plex)	CID	1	0	1	80070	161900	80550	113600	32860	123900	Unique	Used	11087	0.001	0.0197	2328	2242	2.51	0	1988000	3	651.363	1952.07	0	-0.45	0.85	3507	3508	MS2	0/0	0	0	2ms21_2014_479_PFL_Fr1.mgf			80070	161900	80550	113600	32860
High	A	wSTAVEFck	5367	Unambiguous	Complement decay-accelerating factor (Fragment) OS=Homo sapiens GN=CD55 PE=1 SV=1 - [H3BLV0_HUMAN]	10	1	H3BLV0	N-Term(TMT6plex); C8(Carbamidomethyl); K9(TMT6plex)	CID	1	0	1	9432000	7994000	6945000	9156000	6887000	10000000	Unique	Used	11090	0.001	0.00584	1146	1132	4.14	0	62100000	2	793.426	1585.84	0	-0.17	0.85	3514	3515	MS2	0/0	0	0	2ms21_2014_479_PFL_Fr1.mgf			9432000	7994000	6945000	9156000	6887000
High	A	yEVSVYALk	5371	Unambiguous	Putative uncharacterized protein DKFZp686O12165 (Fragment) OS=Homo sapiens GN=DKFZp686O12165 PE=1 SV=1 - [Q6MZM7_HUMAN]	3	1	Q6MZM7	N-Term(TMT6plex); K9(TMT6plex)	CID	1	0	1	2125000	1778000	1512000	3298000	1888000	1955000	Unique	Used	11091	0.001	0.00609	1711	1726	4.18	0	16030000	2	765.453	1529.9	0	0.49	0.85	3516	3517	MS2	0/0	0	0	2ms21_2014_479_PFL_Fr1.mgf			2125000	1778000	1512000	3298000	1888000
High	A	sPVGVQPILNEHTFcAGMSk	4431	Unambiguous	Haptoglobin OS=Homo sapiens GN=HP PE=1 SV=1 - [HPT_HUMAN]	3	1	P00738	N-Term(TMT6plex); C15(Carbamidomethyl); K20(TMT6plex)	CID	1	0	1		254200	50210	9080	15790	195100	No Quan Values	Not Used	11094	0	0.000494	3055	3059	4.45	0	1535000	2	1315.7	2630.4	0.01	6.68	0.85	3522	3523	MS2	0/0	0	0	2ms21_2014_479_PFL_Fr1.mgf				254200	50210	9080	15790
High	A	vVWcAVGEQELR	5388	Unambiguous		0	0		N-Term(TMT6plex); C4(Carbamidomethyl)	CID	1	0	1	175800	152200	190200	125800	119700	87970	No Proteins	Not Used	11095	0	0.00238	1279	1315	4.35	0	2060000	2	837.943	1674.88	0	-2.32	0.85	3525	3526	MS2	0/0	0	0	2ms21_2014_479_PFL_Fr1.mgf			175800	152200	190200	125800	119700
High	A	dEELScTVVELk	5403	Unambiguous	Alpha-1-antichymotrypsin OS=Homo sapiens GN=SERPINA3 PE=1 SV=2 - [AACT_HUMAN]	3	1	P01011	N-Term(TMT6plex); C6(Carbamidomethyl); K12(TMT6plex)	CID	1	0	1	210400	438900	406300	263000	215500	472900	Unique	Used	11099	0	0.000462	2041	1978	5.54	0	3956000	2	940.506	1880	0	-2.56	0.85	3533	3534	MS2	0/0	0	0	2ms21_2014_479_PFL_Fr1.mgf			210400	438900	406300	263000	215500
High	A	eVQVFEITENSAk	5361	Unambiguous	Collagen alpha-3(VI) chain OS=Homo sapiens GN=COL6A3 PE=4 SV=2 - [E7ENL6_HUMAN]	5	1	E7ENL6	N-Term(TMT6plex); K13(TMT6plex)	CID	1	0	1	1650000	1120000	981500	2094000	763700	1247000	Unique	Used	11100	0	8.31e-05	2383	2304	4.94	0	11030000	2	976.543	1952.08	0	2.38	0.85	3536	3537	MS2	0/0	0	0	2ms21_2014_479_PFL_Fr1.mgf			1650000	1120000	981500	2094000	763700
High	A	yYYDGkDYIEFNk	5418	Unambiguous	Zinc-alpha-2-glycoprotein OS=Homo sapiens GN=AZGP1 PE=1 SV=2 - [ZA2G_HUMAN]	1	1	P25311	N-Term(TMT6plex); K6(TMT6plex); K13(TMT6plex)	CID	1	0	1	861200	2154000	1837000	1097000	1911000	2927000	Unique	Used	11102	0.003	0.1	2611	2600	3.03	1	17480000	3	802.426	2405.26	0	-0.27	0.85	3540	3541	MS2	0/0	0	0	2ms21_2014_479_PFL_Fr1.mgf			861200	2154000	1837000	1097000	1911000
High	A	sPVGVQPILNEHTFcAGMSk	4431	Unambiguous	Haptoglobin OS=Homo sapiens GN=HP PE=1 SV=1 - [HPT_HUMAN]	3	1	P00738	N-Term(TMT6plex); C15(Carbamidomethyl); K20(TMT6plex)	CID	1	0	1	356800	4599000	744100	289100	377600	3825000	Unique	Used	11105	0	1.33e-05	2862	2853	6.31	0	27980000	3	877.466	2630.38	0	-0.12	0.85	3547	3548	MS2	0/0	0	0	2ms21_2014_479_PFL_Fr1.mgf			356800	4599000	744100	289100	377600
High	A	yVMLPVADQDQcIR	5434	Unambiguous	Haptoglobin OS=Homo sapiens GN=HP PE=1 SV=1 - [HPT_HUMAN]	3	1	P00738	N-Term(TMT6plex); C12(Carbamidomethyl)	CID	1	0	1	395900	340000	466600	264300	403700	394800	Unique	Used	11106	0	4.76e-05	1343	1234	4.86	0	6652000	3	646.333	1936.99	0	1.5	0.85	3549	3550	MS2	0/0	0	0	2ms21_2014_479_PFL_Fr1.mgf			395900	340000	466600	264300	403700
High	A	tSFPEDTVITYk	5447	Unambiguous	Complement decay-accelerating factor (Fragment) OS=Homo sapiens GN=CD55 PE=1 SV=1 - [H3BLV0_HUMAN]	11	1	H3BLV0	N-Term(TMT6plex); K12(TMT6plex)	CID	1	0	1	920800	1074000	994900	1042000	830400	1195000	Unique	Used	11110	0	0.00201	2060	2010	3.34	0	8401000	2	930.01	1859.01	0	-3.73	0.85	3558	3559	MS2	0/0	0	0	2ms21_2014_479_PFL_Fr1.mgf			920800	1074000	994900	1042000	830400
High	A	dEELScTVVELk	5403	Unambiguous	Alpha-1-antichymotrypsin OS=Homo sapiens GN=SERPINA3 PE=1 SV=2 - [AACT_HUMAN]	3	1	P01011	N-Term(TMT6plex); C6(Carbamidomethyl); K12(TMT6plex)	CID	1	0	1	3249000	8852000	6951000	4466000	4368000	8036000	Unique	Used	11112	0	0.000639	1994	1937	4.69	0	46150000	2	940.508	1880.01	0	0.1	0.85	3562	3563	MS2	0/0	0	0	2ms21_2014_479_PFL_Fr1.mgf			3249000	8852000	6951000	4466000	4368000
High	A	yYYDGkDYIEFNk	5418	Unambiguous	Zinc-alpha-2-glycoprotein OS=Homo sapiens GN=AZGP1 PE=1 SV=2 - [ZA2G_HUMAN]	1	1	P25311	N-Term(TMT6plex); K6(TMT6plex); K13(TMT6plex)	CID	1	0	1	45730	151900	125400	77660	121600	243100	Unique	Used	11113	0.002	0.0347	2609	2575	3.39	1	1588000	2	1203.14	2405.26	0	0.5	0.85	3564	3565	MS2	0/0	0	0	2ms21_2014_479_PFL_Fr1.mgf			45730	151900	125400	77660	121600
High	A	lSITGTYDLk	5466	Unambiguous	Alpha-1-antitrypsin OS=Homo sapiens GN=SERPINA1 PE=1 SV=3 - [A1AT_HUMAN]	4	1	P01009	N-Term(TMT6plex); K10(TMT6plex)	CID	1	0	1	1833000	8663000	4000000	904200	7505000	6868000	Unique	Used	11115	0.001	0.00364	1473	1405	3.37	0	37800000	2	784.969	1568.93	0	0.05	0.85	3569	3570	MS2	0/0	0	0	2ms21_2014_479_PFL_Fr1.mgf			1833000	8663000	4000000	904200	7505000
High	A	tYmLAFDVNDEk	5470	Unambiguous	Alpha-1-acid glycoprotein 1 OS=Homo sapiens GN=ORM1 PE=1 SV=1 - [A1AG1_HUMAN]	1	1	P02763	N-Term(TMT6plex); M3(Oxidation); K12(TMT6plex)	CID	1	0	1	922400	4864000	2909000	1130000	3090000	4853000	Unique	Used	11116	0	0.00159	1415	1384	3.42	0	28030000	2	960.496	1919.99	0	1.42	0.85	3571	3572	MS2	0/0	0	0	2ms21_2014_479_PFL_Fr1.mgf			922400	4864000	2909000	1130000	3090000
High	A	tYmLAFDVNDEk	5470	Unambiguous	Alpha-1-acid glycoprotein 1 OS=Homo sapiens GN=ORM1 PE=1 SV=1 - [A1AG1_HUMAN]	1	1	P02763	N-Term(TMT6plex); M3(Oxidation); K12(TMT6plex)	CID	1	0	1		52250	62960	66480	54360	54410	No Quan Values	Not Used	11117	0.001	0.00745	1391	1352	3.08	0	1537000	3	640.666	1919.98	0	0.3	0.85	3573	3574	MS2	0/0	0	0	2ms21_2014_479_PFL_Fr1.mgf				52250	62960	66480	54360
High	A	dAGEGLLAVQITDPEGkPk	5484	Unambiguous	FLJ00119 protein (Fragment) OS=Homo sapiens GN=FLJ00119 PE=2 SV=1 - [Q8TES4_HUMAN]	8	1	Q8TES4	N-Term(TMT6plex); K17(TMT6plex); K19(TMT6plex)	CID	1	0	1	660900	476200	443500	791300	403700	587800	Unique	Used	11121	0	6.8e-06	2686	2363	4.35	0	8026000	3	875.84	2625.51	0	-0.54	0.85	3582	3583	MS2	0/0	0	0	2ms21_2014_479_PFL_Fr1.mgf			660900	476200	443500	791300	403700
High	A	sELTQDPAVSVALGQTVR	5491	Unambiguous		0	0		N-Term(TMT6plex)	CID	1	0	1	280100	355400	360600	340600	481800	532600	No Proteins	Not Used	11123	0	9.28e-05	2422	2353	5.28	0	335300	2	1050.58	2100.16	0	3.51	0.85	3586	3587	MS2	0/0	0	0	2ms21_2014_479_PFL_Fr1.mgf			280100	355400	360600	340600	481800
High	A	aLSmcPPSPLGcELVk	5497	Unambiguous		0	0		N-Term(TMT6plex); M4(Oxidation); C5(Carbamidomethyl); C12(Carbamidomethyl); K16(TMT6plex)	CID	1	0	1	54870	45830	33610	65510	40960	45080	No Proteins	Not Used	11124	0.001	0.00578	2420	2471	3.85	0	1089000	2	1117.1	2233.19	0.01	4.88	0.85	3588	3589	MS2	0/0	0	0	2ms21_2014_479_PFL_Fr1.mgf			54870	45830	33610	65510	40960
High	A	gLETSLAEcTFTk	5501	Unambiguous	Complement factor I light chain OS=Homo sapiens GN=CFI PE=3 SV=1 - [G3XAM2_HUMAN]	5	1	G3XAM2	N-Term(TMT6plex); C9(Carbamidomethyl); K13(TMT6plex)	CID	1	0	1	1444000	1656000	2073000	1215000	1412000	1378000	Unique	Used	11125	0	0.000188	1758	1729	5.1	0	13220000	2	958.014	1915.02	0	-1.94	0.87	3591	3592	MS2	0/0	0	0	2ms21_2014_479_PFL_Fr1.mgf			1444000	1656000	2073000	1215000	1412000
High	A	lSITGTYDLk	5466	Unambiguous	Alpha-1-antitrypsin OS=Homo sapiens GN=SERPINA1 PE=1 SV=3 - [A1AT_HUMAN]	4	1	P01009	N-Term(TMT6plex); K10(TMT6plex)	CID	1	0	1	974800	5074000	2413000	783100	5039000	4879000	Unique	Used	11126	0.001	0.00749	1476	1407	2.82	0	72920000	2	784.969	1568.93	0	0.37	0.87	3593	3594	MS2	0/0	0	0	2ms21_2014_479_PFL_Fr1.mgf			974800	5074000	2413000	783100	5039000
High	A	sELTQDPAVSVALGQTVR	5491	Unambiguous		0	0		N-Term(TMT6plex)	CID	0	0	1	35700	26980	19000	24320	31190	41660	No Proteins	Not Used	11127	0.001	0.0267	2407	2331	1.54	0	427700	3	700.723	2100.16	0	2.63	0.87	3595	3596	MS2	0/0	0	0	2ms21_2014_479_PFL_Fr1.mgf			35700	26980	19000	24320	31190
High	A	iPTEAPQLELk	5514	Unambiguous		0	0		N-Term(TMT6plex); K11(TMT6plex)	CID	1	0	1	1037000	879100	1213000	1170000	1041000	1049000	No Proteins	Not Used	11128	0.002	0.0445	1189	1097	3.24	0	8504000	2	849.022	1697.04	0.01	6.51	0.87	3597	3598	MS2	0/0	0	0	2ms21_2014_479_PFL_Fr1.mgf			1037000	879100	1213000	1170000	1041000
High	A	eIYcPAPPQIDNGIIQGER	5518	Unambiguous	Complement decay-accelerating factor (Fragment) OS=Homo sapiens GN=CD55 PE=1 SV=1 - [H3BLV0_HUMAN]	11	1	H3BLV0	N-Term(TMT6plex); C4(Carbamidomethyl)	CID	1	0	1	45070	34010	39240	70890	28650	35170	Unique	Used	11129	0	0.00107	1984	2005	4.16	0	766000	2	1200.11	2399.22	0	-2.36	0.87	3599	3600	MS2	0/0	0	0	2ms21_2014_479_PFL_Fr1.mgf			45070	34010	39240	70890	28650
High	A	fSVQMFR	5522	Unambiguous	cDNA FLJ38724 fis, clone KIDNE2010151, highly similar to UROMODULIN OS=Homo sapiens PE=2 SV=1 - [B3KTU0_HUMAN]	8	1	B3KTU0	N-Term(TMT6plex)	CID	1	0	1	1887000	1688000	270300	2442000	3543000	1309000	Unique	Used	11130	0.004	0.122	500	497	1.79	0	16540000	2	572.312	1143.62	0	-0.47	0.87	3602	3603	MS2	0/0	0	0	2ms21_2014_479_PFL_Fr1.mgf			1887000	1688000	270300	2442000	3543000
High	A	yVMLPVADQDQcIR	5434	Unambiguous	Haptoglobin OS=Homo sapiens GN=HP PE=1 SV=1 - [HPT_HUMAN]	3	1	P00738	N-Term(TMT6plex); C12(Carbamidomethyl)	CID	1	0	1	183400	1014000	356400	135400	173800	943300	Unique	Used	11131	0	0.000148	1265	1169	4.02	0	4939000	2	968.995	1936.98	0	-0.16	0.87	3604	3605	MS2	0/0	0	0	2ms21_2014_479_PFL_Fr1.mgf			183400	1014000	356400	135400	173800
High	A	gEcQAEGVLFFQGDR	5542	Unambiguous	Hemopexin OS=Homo sapiens GN=HPX PE=1 SV=2 - [HEMO_HUMAN]	1	1	P02790	N-Term(TMT6plex); C3(Carbamidomethyl)	CID	1	0	1	787300	2052000	784000	974500	910900	1541000	Unique	Used	11135	0	0.000798	614	579	4.43	0	11100000	2	971.469	1941.93	0	-1.1	0.87	3613	3614	MS2	0/0	0	0	2ms21_2014_479_PFL_Fr1.mgf			787300	2052000	784000	974500	910900
High	A	eGEAVVLPEVEPGLTAR	5546	Unambiguous		0	0		N-Term(TMT6plex)	CID	1	0	1	786000	578100	634700	1131000	757200	567400	No Proteins	Not Used	11136	0	1.34e-05	2359	2337	4.14	0	8381000	2	998.055	1995.1	0	3.01	0.87	3615	3616	MS2	0/0	0	0	2ms21_2014_479_PFL_Fr1.mgf			786000	578100	634700	1131000	757200
High	A	nTGVISVVTTGLDR	5552	Unambiguous	Cadherin-1 OS=Homo sapiens GN=CDH1 PE=1 SV=1 - [H3BNC6_HUMAN]	9	1	H3BNC6	N-Term(TMT6plex)	CID	1	0	1	12280	17150	8371	19120	10890	18430	Unique	Used	11137	0	0.000617	2186	2236	2.83	0	229200	3	554.319	1660.94	0	0.27	0.87	3617	3618	MS2	0/0	0	0	2ms21_2014_479_PFL_Fr1.mgf			12280	17150	8371	19120	10890
High	A	vAEQVLNAVNk	5567	Unambiguous		0	0		N-Term(TMT6plex); K11(TMT6plex)	CID	1	0	1	546900	594300	891000	1050000	575700	805800	No Proteins	Not Used	11141	0	0.00174	1531	1512	4.42	0	6761000	2	821.996	1642.98	0	-2.66	0.87	3626	3627	MS2	0/0	0	0	2ms21_2014_479_PFL_Fr1.mgf			546900	594300	891000	1050000	575700
Middle	A	iEALTTIck	5576	Unambiguous		0	0		N-Term(TMT6plex); C8(Carbamidomethyl); K9(TMT6plex)	CID	1	0	1	19430	37980	45770	19950	35690	29810	No Proteins	Not Used	11143	0.018	0.344	1769	1831	1.22	0	332700	3	502.97	1506.89	0	-1.44	0.87	3630	3631	MS2	0/0	0	0	2ms21_2014_479_PFL_Fr1.mgf			19430	37980	45770	19950	35690
High	A	yYcFQGNQFLR	5581	Unambiguous	Hemopexin OS=Homo sapiens GN=HPX PE=1 SV=2 - [HEMO_HUMAN]	1	1	P02790	N-Term(TMT6plex); C3(Carbamidomethyl)	CID	1	0	1	2202000	7194000	3491000	2168000	3973000	6958000	Unique	Used	11145	0.001	0.0217	709	632	2.93	0	44000000	2	862.925	1724.84	0	0.46	0.87	3635	3636	MS2	0/0	0	0	2ms21_2014_479_PFL_Fr1.mgf			2202000	7194000	3491000	2168000	3973000
High	A	vSGPAAPAQSYTALFR	5598	Unambiguous		0	0		N-Term(TMT6plex)	CID	1	0	1	1383000	809900	350300	659700	993100	871800	No Proteins	Not Used	11150	0	0.000228	2467	2381	4.07	0	8465000	2	933.014	1865.02	0	4.82	0.87	3646	3647	MS2	0/0	0	0	2ms21_2014_479_PFL_Fr1.mgf			1383000	809900	350300	659700	993100
High	A	eIVLTQSPGTLSLSPGER	5602	Unambiguous	Myosin-reactive immunoglobulin light chain variable region (Fragment) OS=Homo sapiens PE=2 SV=1 - [Q9UL78_HUMAN]	1	1	Q9UL78	N-Term(TMT6plex)	CID	1	0	1	1638000	994300	1503000	1130000	913300	1280000	Unique	Used	11151	0	9.84e-06	2428	2454	5.64	0	14870000	2	1057.09	2113.17	0	1.46	0.87	3648	3649	MS2	0/0	0	0	2ms21_2014_479_PFL_Fr1.mgf			1638000	994300	1503000	1130000	913300
High	A	fQELESETLk	5613	Unambiguous	Prostatic acid phosphatase OS=Homo sapiens GN=ACPP PE=1 SV=3 - [PPAP_HUMAN]	3	1	P15309	N-Term(TMT6plex); K10(TMT6plex)	CID	1	0	1	16040	21110	13550	14210	19130	14880	Unique	Used	11153	0.001	0.0202	1871	1809	2.27	0	303900	3	561.319	1681.94	0	0.72	0.87	3652	3653	MS2	0/0	0	0	2ms21_2014_479_PFL_Fr1.mgf			16040	21110	13550	14210	19130
High	A	vSGPAAPAQSYTALFR	5598	Unambiguous		0	0		N-Term(TMT6plex)	CID	1	0	1	20520	24000	39180	17560		48730	No Proteins	Not Used	11156	0.002	0.0401	2340	2278	2.95	0	339900	3	622.343	1865.01	0	0.59	0.87	3659	3660	MS2	0/0	0	0	2ms21_2014_479_PFL_Fr1.mgf			20520	24000	39180	17560
High	A	sPIDTFPTDPIk	5625	Unambiguous	Prostatic acid phosphatase OS=Homo sapiens GN=ACPP PE=1 SV=3 - [PPAP_HUMAN]	3	1	P15309	N-Term(TMT6plex); K12(TMT6plex)	CID	1	0	1	93100	32990	31860	37480	35840	36000	Unique	Used	11157	0.003	0.106	2790	2718	1.8	0	430600	3	597.009	1789.01	0	-1.48	0.87	3661	3662	MS2	0/0	0	0	2ms21_2014_479_PFL_Fr1.mgf			93100	32990	31860	37480	35840
High	A	eIVYPFQGDSTVTk	5627	Unambiguous		0	0		N-Term(TMT6plex); K14(TMT6plex)	CID	1	0	1	35040	22380	21610	43530	24830	33370	No Proteins	Not Used	11158	0	0.00011	2343	2392	4.09	0	1140000	2	1021.57	2042.13	0	2.42	0.87	3663	3664	MS2	0/0	0	0	2ms21_2014_479_PFL_Fr1.mgf			35040	22380	21610	43530	24830
High	A	sPIDTFPTDPIk	5625	Unambiguous	Prostatic acid phosphatase OS=Homo sapiens GN=ACPP PE=1 SV=3 - [PPAP_HUMAN]	3	1	P15309	N-Term(TMT6plex); K12(TMT6plex)	CID	1	0	1	9334000	2709000	2289000	5830000	4027000	1989000	Unique	Used	11161	0.002	0.0791	2721	2668	2.48	0	38980000	2	895.012	1789.02	0	1.08	0.87	3670	3671	MS2	0/0	0	0	2ms21_2014_479_PFL_Fr1.mgf			9334000	2709000	2289000	5830000	4027000
High	A	sYPGLTSYLVR	5655	Unambiguous	Neutrophil gelatinase-associated lipocalin OS=Homo sapiens GN=LCN2 PE=1 SV=2 - [NGAL_HUMAN]	4	1	P80188	N-Term(TMT6plex)	CID	1	0	1	69050	62970	72100	39650	79620	77770	Unique	Used	11164	0.002	0.0969	1355	1412	3.4	0	1818000	2	742.924	1484.84	0.01	7.09	0.87	3676	3677	MS2	0/0	0	0	2ms21_2014_479_PFL_Fr1.mgf			69050	62970	72100	39650	79620
High	A	cLAYDFYPGk	5663	Unambiguous	Zinc-alpha-2-glycoprotein OS=Homo sapiens GN=AZGP1 PE=1 SV=2 - [ZA2G_HUMAN]	1	1	P25311	N-Term(TMT6plex); C1(Carbamidomethyl); K10(TMT6plex)	CID	1	0	1	1397000	3892000	2926000	2437000	2560000	4604000	Unique	Used	11166	0	0.00305	1454	1422	3.65	0	24330000	2	846.449	1691.89	0	2.67	0.87	3681	3682	MS2	0/0	0	0	2ms21_2014_479_PFL_Fr1.mgf			1397000	3892000	2926000	2437000	2560000
High	A	lGVLTVTDTTPDSMR	5707	Unambiguous	Isoform 3 of Tenascin-X OS=Homo sapiens GN=TNXB - [TENX_HUMAN]	3	1	P22105-3	N-Term(TMT6plex)	CID	1	0	1	423900	287700	336000	556800	278300	411400	Unique	Used	11178	0.001	0.00435	2048	2046	4.84	0	4158000	2	917.995	1834.98	0	2.43	0.88	3707	3708	MS2	0/0	0	0	2ms21_2014_479_PFL_Fr1.mgf			423900	287700	336000	556800	278300
High	A	gPWcYVSGEAGVPEk	5711	Unambiguous	Phosphoinositide-3-kinase-interacting protein 1 (Fragment) OS=Homo sapiens GN=PIK3IP1 PE=4 SV=3 - [C9JMK5_HUMAN]	4	1	C9JMK5	N-Term(TMT6plex); C4(Carbamidomethyl); K15(TMT6plex)	CID	1	0	1	3589000	2587000	2375000	5848000	2461000	2365000	Unique	Used	11179	0	0.000498	1838	1859	4.27	0	29590000	2	1047.54	2094.08	0	1.95	0.88	3709	3710	MS2	0/0	0	0	2ms21_2014_479_PFL_Fr1.mgf			3589000	2587000	2375000	5848000	2461000
High	A	eIVLTQSPGTLSLSPGER	5602	Unambiguous	Myosin-reactive immunoglobulin light chain variable region (Fragment) OS=Homo sapiens PE=2 SV=1 - [Q9UL78_HUMAN]	1	1	Q9UL78	N-Term(TMT6plex)	CID	1	0	1	317200	239000	269000	331400	162700	270600	Unique	Used	11180	0	0.00132	2389	2414	4.1	0	11210000	3	705.062	2113.17	0	0.38	0.88	3712	3713	MS2	0/0	0	0	2ms21_2014_479_PFL_Fr1.mgf			317200	239000	269000	331400	162700
High	A	fSIEGSYQLEk	5737	Unambiguous	Plasma serine protease inhibitor OS=Homo sapiens GN=SERPINA5 PE=1 SV=3 - [IPSP_HUMAN]	1	1	P05154	N-Term(TMT6plex); K11(TMT6plex)	CID	1	0	1	124300	341200	177100	159100	108300	306400	Unique	Used	11184	0	0.00223	2045	2049	4.45	0	3648000	2	879.99	1758.97	0	2.26	0.88	3720	3721	MS2	0/0	0	0	2ms21_2014_479_PFL_Fr1.mgf			124300	341200	177100	159100	108300
High	A	sVLGQLGITk	5759	Unambiguous	Alpha-1-antitrypsin OS=Homo sapiens GN=SERPINA1 PE=1 SV=3 - [A1AT_HUMAN]	4	1	P01009	N-Term(TMT6plex); K10(TMT6plex)	CID	1	0	1	2488000	11730000	5155000	1394000	9933000	8677000	Unique	Used	11190	0	0.0014	1100	1091	4.25	0	51920000	2	737.475	1473.94	0	0.87	0.88	3734	3735	MS2	0/0	0	0	2ms21_2014_479_PFL_Fr1.mgf			2488000	11730000	5155000	1394000	9933000
High	A	sVLGQLGITk	5759	Unambiguous	Alpha-1-antitrypsin OS=Homo sapiens GN=SERPINA1 PE=1 SV=3 - [A1AT_HUMAN]	4	1	P01009	N-Term(TMT6plex); K10(TMT6plex)	CID	1	0	1		139800	100400	27520	135300	129300	No Quan Values	Not Used	11193	0.008	0.196	1416	1413	2.54	0	1622000	3	491.985	1473.94	0	-0.59	0.88	3740	3741	MS2	0/0	0	0	2ms21_2014_479_PFL_Fr1.mgf				139800	100400	27520	135300
High	A	iDITLSSVk	5777	Unambiguous	cDNA FLJ53478, highly similar to Galectin-3-binding protein OS=Homo sapiens PE=2 SV=1 - [B4DVE1_HUMAN]	2	1	B4DVE1	N-Term(TMT6plex); K9(TMT6plex)	CID	1	0	1	34350	41610	20860		60260	52390	Unique	Used	11195	0.002	0.0448	1180	1124	3.2	0	1285000	2	717.454	1433.9	0	2.04	0.88	3745	3746	MS2	0/0	0	0	2ms21_2014_479_PFL_Fr1.mgf			34350	41610	20860		60260
High	A	dTQFSYAVFk	5785	Unambiguous	Immunoglobulin superfamily member 8 (Fragment) OS=Homo sapiens GN=IGSF8 PE=4 SV=1 - [C9J8Z4_HUMAN]	3	1	C9J8Z4	N-Term(TMT6plex); K10(TMT6plex)	CID	1	0	1	1291000	549100	506500	1470000	494700	701100	Unique	Used	11197	0	0.00236	1812	1879	3.77	0	6838000	2	832.458	1663.91	0	-0.67	0.88	3749	3750	MS2	0/0	0	0	2ms21_2014_479_PFL_Fr1.mgf			1291000	549100	506500	1470000	494700
High	A	vMPIcLPSk	5798	Unambiguous	Haptoglobin OS=Homo sapiens GN=HP PE=1 SV=1 - [HPT_HUMAN]	3	1	P00738	N-Term(TMT6plex); C5(Carbamidomethyl); K9(TMT6plex)	CID	1	0	1	602700	10170000	2332000	411000	815700	8044000	Unique	Used	11200	0.001	0.00382	1819	1852	2.34	0	28080000	2	751.946	1502.88	0	-0.08	0.88	3756	3757	MS2	0/0	0	0	2ms21_2014_479_PFL_Fr1.mgf			602700	10170000	2332000	411000	815700
High	A	gPWcYVSGEAGVPEk	5711	Unambiguous	Phosphoinositide-3-kinase-interacting protein 1 (Fragment) OS=Homo sapiens GN=PIK3IP1 PE=4 SV=3 - [C9JMK5_HUMAN]	4	1	C9JMK5	N-Term(TMT6plex); C4(Carbamidomethyl); K15(TMT6plex)	CID	1	0	1	5478000	4062000	3253000	8760000	3591000	3866000	Unique	Used	11205	0	0.00135	1783	1807	2.6	0	83060000	3	698.696	2094.07	0	0.49	0.88	3767	3768	MS2	0/0	0	0	2ms21_2014_479_PFL_Fr1.mgf			5478000	4062000	3253000	8760000	3591000
High	A	dYELLcLDGTR	5845	Unambiguous	Transferrin variant (Fragment) OS=Homo sapiens PE=2 SV=1 - [Q53H26_HUMAN]	6	1	Q53H26	N-Term(TMT6plex); C6(Carbamidomethyl)	CID	1	0	1	127100	1056000	418800	123800	966500	838500	Unique	Used	11212	0.001	0.00895	680	706	3.7	0	5115000	2	792.403	1583.8	0	2.63	0.88	3783	3784	MS2	0/0	0	0	2ms21_2014_479_PFL_Fr1.mgf			127100	1056000	418800	123800	966500
High	A	sVLGQLGITk	5759	Unambiguous	Alpha-1-antitrypsin OS=Homo sapiens GN=SERPINA1 PE=1 SV=3 - [A1AT_HUMAN]	4	1	P01009	N-Term(TMT6plex); K10(TMT6plex)	CID	1	0	1		918600	424600	197200	1165000	953300	No Quan Values	Not Used	11214	0.001	0.00563	1098	1086	3.63	0	12700000	2	737.474	1473.94	0	0.62	0.88	3787	3788	MS2	0/0	0	0	2ms21_2014_479_PFL_Fr1.mgf				918600	424600	197200	1165000
High	A	dSTYSLSSTLTLSk	4222	Unambiguous	Epididymis luminal protein 213 OS=Homo sapiens GN=HEL-213 PE=2 SV=1 - [V9HW34_HUMAN]|Protein IGKV3-11 OS=Homo sapiens GN=IGKV3-11 PE=4 SV=1 - [A0A087WZW8_HUMAN]	16	2	V9HW34;A0A087WZW8	N-Term(TMT6plex); K14(TMT6plex)	CID	1	0	1	1048000	691500	868000	670200	630000	951300	Not Unique	Not Used	11215	0	0.000375	2424	2395	4.81	0	6728000	2	981.047	1961.09	0	0.84	0.88	3790	3791	MS2	0/0	0	0	2ms21_2014_479_PFL_Fr1.mgf			1048000	691500	868000	670200	630000
High	A	dIMAEIYk	3719	Unambiguous		0	0		N-Term(TMT6plex); K8(TMT6plex)	CID	1	0	1							No Proteins	Not Used		0.002	0.0513	1303	1351	3.1	0	1124000	2	720.914	1440.82	0	1.87	0.9	3803	3804	MS2	0/0	0	0	2ms21_2014_479_PFL_Fr1.mgf
High	A	tLLSNLEEAk	5895	Unambiguous	Isoform 4 of Clusterin OS=Homo sapiens GN=CLU - [CLUS_HUMAN]	4	1	P10909-4	N-Term(TMT6plex); K10(TMT6plex)	CID	1	0	1	712500	1102000	1666000	845100	907100	1083000	Unique	Used	11223	0.001	0.00392	2111	2174	4.32	0	8076000	2	788.472	1575.94	0	0.62	0.9	3807	3808	MS2	0/0	0	0	2ms21_2014_479_PFL_Fr1.mgf			712500	1102000	1666000	845100	907100
High	A	aIPVAQDLNAPSDWDSR	5903	Unambiguous	Isoform D of Osteopontin OS=Homo sapiens GN=SPP1 - [OSTP_HUMAN]	6	1	P10451-4	N-Term(TMT6plex)	CID	1	0	1							No Quan Values	Not Used	11225	0	0.00169	1697	1705	3.95	0	978400	2	1042.54	2084.07	0	3.51	0.9	3812	3813	MS2	0/0	0	0	2ms21_2014_479_PFL_Fr1.mgf
High	A	eIVMTQSPPTLSLSPGER	5948	Unambiguous		0	0		N-Term(TMT6plex)	CID	1	0	1	240800	277500	542700	135200	339300	313200	No Proteins	Not Used	11235	0	0.000214	2390	2458	3.62	0	4809000	2	1086.09	2171.18	0.01	10	0.9	3834	3835	MS2	0/0	0	0	2ms21_2014_479_PFL_Fr1.mgf			240800	277500	542700	135200	339300
High	A	aIPVAQDLNAPSDWDSR	5903	Unambiguous	Isoform D of Osteopontin OS=Homo sapiens GN=SPP1 - [OSTP_HUMAN]	6	1	P10451-4	N-Term(TMT6plex)	CID	1	0	1	278700	250600	426300	348700	203100	276900	Unique	Used	11236	0	0.000162	1630	1639	4	0	11620000	2	1042.54	2084.06	0	1.28	0.9	3836	3837	MS2	0/0	0	0	2ms21_2014_479_PFL_Fr1.mgf			278700	250600	426300	348700	203100
High	A	eIGELYLPk	5976	Unambiguous	Alpha-1-antichymotrypsin OS=Homo sapiens GN=SERPINA3 PE=1 SV=2 - [AACT_HUMAN]	3	1	P01011	N-Term(TMT6plex); K9(TMT6plex)	CID	1	0	1	147300	449000	381700	179400	215800	460700	Unique	Used	11242	0.001	0.0187	1763	1755	2.46	0	6332000	3	507.309	1519.91	0	-0.33	0.9	3849	3850	MS2	0/0	0	0	2ms21_2014_479_PFL_Fr1.mgf			147300	449000	381700	179400	215800
High	A	gSLLLGGLDAEASR	5978	Unambiguous		0	0		N-Term(TMT6plex)	CID	1	0	1	250400	379100	251800	203800	307400	327300	No Proteins	Not Used	11243	0	0.000589	1941	1927	4.52	0	2673000	2	794.45	1587.89	0	0.92	0.9	3851	3852	MS2	0/0	0	0	2ms21_2014_479_PFL_Fr1.mgf			250400	379100	251800	203800	307400
High	A	mYLGYEYVTAIR	5987	Unambiguous	Transferrin variant (Fragment) OS=Homo sapiens PE=2 SV=1 - [Q53H26_HUMAN]	6	1	Q53H26	N-Term(TMT6plex); M1(Oxidation)	CID	1	0	1	403900	3398000	1613000	171300	2883000	2984000	Unique	Used	11245	0.001	0.00754	1223	1225	1.85	0	22430000	2	862.449	1723.89	0	-1.32	0.9	3856	3857	MS2	0/0	0	0	2ms21_2014_479_PFL_Fr1.mgf			403900	3398000	1613000	171300	2883000
High	A	qEPSQGTTTFAVTSILR	6023	Unambiguous	Ig alpha-1 chain C region OS=Homo sapiens GN=IGHA1 PE=1 SV=2 - [IGHA1_HUMAN]|Putative uncharacterized protein DKFZp686M08189 OS=Homo sapiens GN=DKFZp686M08189 PE=2 SV=1 - [Q6MZX9_HUMAN]	11	2	P01876;Q6MZX9	N-Term(TMT6plex)	CID	1	0	1						115800	No Quan Values	Not Used	11254	0	0.00159	2795	2719	3.58	0	3585000	3	689.043	2065.11	0	0.68	0.9	3875	3876	MS2	0/0	0	0	2ms21_2014_479_PFL_Fr1.mgf
High	A	gAYTQVIFLAR	6025	Unambiguous	Glucosidase, alpha acid (Pompe disease, glycogen storage disease type II), isoform CRA_a OS=Homo sapiens GN=GAA PE=3 SV=1 - [A0A024R8Q1_HUMAN]	2	1	A0A024R8Q1	N-Term(TMT6plex)	CID	1	0	1	297000	304400	732600	489500	245300	512300	Unique	Used	11255	0.001	0.00481	1330	1313	3.96	0	4386000	2	734.431	1467.85	0	1.37	0.9	3878	3879	MS2	0/0	0	0	2ms21_2014_479_PFL_Fr1.mgf			297000	304400	732600	489500	245300
High	A	iNFAcSYPLDmk	6029	Unambiguous	cDNA FLJ38724 fis, clone KIDNE2010151, highly similar to UROMODULIN OS=Homo sapiens PE=2 SV=1 - [B3KTU0_HUMAN]	8	1	B3KTU0	N-Term(TMT6plex); C5(Carbamidomethyl); M11(Oxidation); K12(TMT6plex)	CID	1	0	1	985500	930800	284400	1361000	1580000	657200	Unique	Used	11256	0.001	0.0061	1419	1346	2.64	0	8969000	2	967.003	1933	0	0.93	0.9	3880	3881	MS2	0/0	0	0	2ms21_2014_479_PFL_Fr1.mgf			985500	930800	284400	1361000	1580000
High	A	eTLFSVmPGLk	6033	Unambiguous	cDNA FLJ51742, highly similar to Inter-alpha-trypsin inhibitor heavy chain H4 OS=Homo sapiens PE=2 SV=1 - [B7Z544_HUMAN]	7	1	B7Z544	N-Term(TMT6plex); M7(Oxidation); K11(TMT6plex)	CID	1	0	1	709100	316700	316700	677300	363600	439600	Unique	Used	11257	0.001	0.00376	1834	1768	3.03	0	4822000	3	565.997	1695.98	0	0.29	0.9	3882	3883	MS2	0/0	0	0	2ms21_2014_479_PFL_Fr1.mgf			709100	316700	316700	677300	363600
High	A	aAPSVTLFPPSSEELQANk	6035	Unambiguous	Uncharacterized protein OS=Homo sapiens PE=2 SV=1 - [Q6GMV8_HUMAN]	32	1	Q6GMV8	N-Term(TMT6plex); K19(TMT6plex)	CID	1	0	1	200800	194500	232900	122600	154500	200500	Unique	Used	11258	0	0.000458	3020	3136	4.34	0	2507000	2	1222.68	2444.35	0	2.99	0.9	3884	3885	MS2	0/0	0	0	2ms21_2014_479_PFL_Fr1.mgf			200800	194500	232900	122600	154500
High	A	aYVAVDGIPQGVLER	6039	Unambiguous	Isoform 3 of Beta-galactosidase OS=Homo sapiens GN=GLB1 - [BGAL_HUMAN]	8	1	P16278-3	N-Term(TMT6plex)	CID	1	0	1	434400	377300	557400	470200	337700	477300	Unique	Used	11259	0.001	0.00342	2439	2279	4.41	0	4726000	2	908.511	1816.02	0	-0.7	0.9	3886	3887	MS2	0/0	0	0	2ms21_2014_479_PFL_Fr1.mgf			434400	377300	557400	470200	337700
High	A	fSGSGSGTDFTLTISR	6043	Unambiguous	Epididymis luminal protein 213 OS=Homo sapiens GN=HEL-213 PE=2 SV=1 - [V9HW34_HUMAN]|Myosin-reactive immunoglobulin light chain variable region (Fragment) OS=Homo sapiens PE=2 SV=1 - [Q9UL78_HUMAN]	4	2	V9HW34;Q9UL78	N-Term(TMT6plex)	CID	1	0	1	904200	674800	914700	630500	803900	982900	Not Unique	Not Used	11260	0	6.42e-05	1235	1272	5.37	0	7837000	2	931.479	1861.95	0	0.78	0.9	3889	3890	MS2	0/0	0	0	2ms21_2014_479_PFL_Fr1.mgf			904200	674800	914700	630500	803900
High	A	qEPSQGTTTFAVTSILR	6023	Unambiguous	Ig alpha-1 chain C region OS=Homo sapiens GN=IGHA1 PE=1 SV=2 - [IGHA1_HUMAN]|Putative uncharacterized protein DKFZp686M08189 OS=Homo sapiens GN=DKFZp686M08189 PE=2 SV=1 - [Q6MZX9_HUMAN]	11	2	P01876;Q6MZX9	N-Term(TMT6plex)	CID	1	0	1	514300	1314000	1415000	251200	1546000	1746000	Not Unique	Not Used	11263	0	3.88e-05	2828	2793	4.76	0	14780000	2	1033.06	2065.12	0	1.92	0.9	3895	3896	MS2	0/0	0	0	2ms21_2014_479_PFL_Fr1.mgf			514300	1314000	1415000	251200	1546000
High	A	vFMYLSDSR	6063	Unambiguous	cDNA FLJ38724 fis, clone KIDNE2010151, highly similar to UROMODULIN OS=Homo sapiens PE=2 SV=1 - [B3KTU0_HUMAN]	8	1	B3KTU0	N-Term(TMT6plex)	CID	1	0	1	1890000	1634000	343900	2300000	3222000	1376000	Unique	Used	11265	0.002	0.0348	664	620	3.18	0	16770000	2	673.853	1346.7	0	0.12	0.9	3900	3901	MS2	0/0	0	0	2ms21_2014_479_PFL_Fr1.mgf			1890000	1634000	343900	2300000	3222000
High	A	lSITGTYDLk	5466	Unambiguous	Alpha-1-antitrypsin OS=Homo sapiens GN=SERPINA1 PE=1 SV=3 - [A1AT_HUMAN]	4	1	P01009	N-Term(TMT6plex); K10(TMT6plex)	CID	1	0	1	498400	2057000	1062000	364000	1868000	1770000	Unique	Used	11266	0.001	0.0066	1349	1297	3.37	0	9505000	2	784.97	1568.93	0	1.69	0.9	3902	3903	MS2	0/0	0	0	2ms21_2014_479_PFL_Fr1.mgf			498400	2057000	1062000	364000	1868000
High	A	iNFAcSYPLDmk	6029	Unambiguous	cDNA FLJ38724 fis, clone KIDNE2010151, highly similar to UROMODULIN OS=Homo sapiens PE=2 SV=1 - [B3KTU0_HUMAN]	8	1	B3KTU0	N-Term(TMT6plex); C5(Carbamidomethyl); M11(Oxidation); K12(TMT6plex)	CID	1	0	1	661100	637100	161000	1037000	1299000	422500	Unique	Used	11267	0	0.000138	1419	1346	2.89	0	23140000	3	645.004	1933	0	0.95	0.9	3904	3905	MS2	0/0	0	0	2ms21_2014_479_PFL_Fr1.mgf			661100	637100	161000	1037000	1299000
High	A	vFMYLSDSR	6063	Unambiguous	cDNA FLJ38724 fis, clone KIDNE2010151, highly similar to UROMODULIN OS=Homo sapiens PE=2 SV=1 - [B3KTU0_HUMAN]	8	1	B3KTU0	N-Term(TMT6plex)	CID	1	0	1	10060000	9595000	1703000	13120000	18940000	7838000	Unique	Used	11274	0.001	0.0112	670	624	2.52	0	94910000	2	673.853	1346.7	0	0.49	0.92	3919	3920	MS2	0/0	0	0	2ms21_2014_479_PFL_Fr1.mgf			10060000	9595000	1703000	13120000	18940000
High	A	eTLFSVmPGLk	6033	Unambiguous	cDNA FLJ51742, highly similar to Inter-alpha-trypsin inhibitor heavy chain H4 OS=Homo sapiens PE=2 SV=1 - [B7Z544_HUMAN]	7	1	B7Z544	N-Term(TMT6plex); M7(Oxidation); K11(TMT6plex)	CID	1	0	1	3503000	2788000	2963000	3916000	2603000	3287000	Unique	Used	11275	0	0.000563	1843	1784	3.44	0	28610000	2	848.492	1695.98	0	0.66	0.92	3922	3923	MS2	0/0	0	0	2ms21_2014_479_PFL_Fr1.mgf			3503000	2788000	2963000	3916000	2603000
High	A	sMcGYQTFFAGk	6135	Unambiguous	N-acetylglucosamine-6-sulfatase (Fragment) OS=Homo sapiens GN=GNS PE=1 SV=3 - [F5H4C6_HUMAN]	9	1	F5H4C6	N-Term(TMT6plex); C3(Carbamidomethyl); K12(TMT6plex)	CID	1	0	1	568900	620800	658100	635500	456800	824700	Unique	Used	11286	0	0.000272	1024	1024	4.26	0	4918000	2	927.967	1854.93	0	-0.76	0.92	3946	3947	MS2	0/0	0	0	2ms21_2014_479_PFL_Fr1.mgf			568900	620800	658100	635500	456800
High	A	lVSEFTITk	6148	Unambiguous	Bile salt-dependent lipase oncofetal isoform (Fragment) OS=Homo sapiens PE=2 SV=1 - [O75612_HUMAN]	5	1	O75612	N-Term(TMT6plex); K9(TMT6plex)	CID	1	0	1	720300	619600	506000	1305000	473600	797100	Unique	Used	11289	0.001	0.0145	1100	1047	3.32	0	5920000	2	748.461	1495.92	0	1.21	0.92	3953	3954	MS2	0/0	0	0	2ms21_2014_479_PFL_Fr1.mgf			720300	619600	506000	1305000	473600
High	A	aLDFAVGEYNk	6152	Unambiguous		0	0		N-Term(TMT6plex); K11(TMT6plex)	CID	1	0	1	252300	171700	127700	287100	167100	183900	No Proteins	Not Used	11290	0.001	0.016	1585	1680	3.71	0	2020000	2	842.968	1684.93	0	-1.68	0.92	3955	3956	MS2	0/0	0	0	2ms21_2014_479_PFL_Fr1.mgf			252300	171700	127700	287100	167100
High	A	eFLEDTcVQYVQk	6167	Unambiguous	Endothelial protein C receptor OS=Homo sapiens GN=PROCR PE=1 SV=1 - [EPCR_HUMAN]	1	1	Q9UNN8	N-Term(TMT6plex); C7(Carbamidomethyl); K13(TMT6plex)	CID	1	0	1	778300	519300	535200	702000	721200	634900	Unique	Used	11293	0	0.000782	2073	1989	5.13	0	6271000	2	1059.06	2117.11	0.01	5.28	0.92	3963	3964	MS2	0/0	0	0	2ms21_2014_479_PFL_Fr1.mgf			778300	519300	535200	702000	721200
High	A	qEPSQGTTTFAVTSILR	6023	Unambiguous	Ig alpha-1 chain C region OS=Homo sapiens GN=IGHA1 PE=1 SV=2 - [IGHA1_HUMAN]|Putative uncharacterized protein DKFZp686M08189 OS=Homo sapiens GN=DKFZp686M08189 PE=2 SV=1 - [Q6MZX9_HUMAN]	11	2	P01876;Q6MZX9	N-Term(TMT6plex)	CID	1	0	1			10520			14240	No Quan Values	Not Used	11295	0	7.01e-05	2795	2719	4.56	0	727100	2	1033.06	2065.11	0	0.62	0.92	3967	3968	MS2	0/0	0	0	2ms21_2014_479_PFL_Fr1.mgf					10520
High	A	aNPTVTLFPPSSEELQANk	6200	Unambiguous		0	0		N-Term(TMT6plex); K19(TMT6plex)	CID	1	0	1	94660	126800	109300	121300	91860	124900	No Proteins	Not Used	11302	0	0.000953	3067	3071	4.29	0	1102000	2	1251.2	2501.39	0.01	8.21	0.92	3983	3984	MS2	0/0	0	0	2ms21_2014_479_PFL_Fr1.mgf			94660	126800	109300	121300	91860
High	A	gPWcYVSGEAGVPEk	5711	Unambiguous	Phosphoinositide-3-kinase-interacting protein 1 (Fragment) OS=Homo sapiens GN=PIK3IP1 PE=4 SV=3 - [C9JMK5_HUMAN]	4	1	C9JMK5	N-Term(TMT6plex); C4(Carbamidomethyl); K15(TMT6plex)	CID	1	0	1	328800	276200	275600	482300	224900	269000	Unique	Used	11304	0	8.17e-05	1765	1791	4.14	0	2957000	2	1047.54	2094.07	0	-0.15	0.92	3988	3989	MS2	0/0	0	0	2ms21_2014_479_PFL_Fr1.mgf			328800	276200	275600	482300	224900
High	A	mYLGYEYVTAIR	5987	Unambiguous	Transferrin variant (Fragment) OS=Homo sapiens PE=2 SV=1 - [Q53H26_HUMAN]	6	1	Q53H26	N-Term(TMT6plex); M1(Oxidation)	CID	1	0	1	203800	2010000	923600	191000	1681000	1902000	Unique	Used	11309	0.001	0.0157	1239	1248	2.07	0	12550000	2	862.451	1723.89	0	0.67	0.92	3999	4000	MS2	0/0	0	0	2ms21_2014_479_PFL_Fr1.mgf			203800	2010000	923600	191000	1681000
High	A	aAPSVTLFPPSSEELQANk	6035	Unambiguous	Uncharacterized protein OS=Homo sapiens PE=2 SV=1 - [Q6GMV8_HUMAN]	32	1	Q6GMV8	N-Term(TMT6plex); K19(TMT6plex)	CID	1	0	1	1374000	1405000	1683000	1114000	1156000	1688000	Unique	Used	11310	0	4.32e-05	3033	3162	4.31	0	12520000	2	1222.68	2444.35	0	0.5	0.92	4002	4003	MS2	0/0	0	0	2ms21_2014_479_PFL_Fr1.mgf			1374000	1405000	1683000	1114000	1156000
High	A	eIVLTQSPATLSLSPGER	6254	Unambiguous		0	0		N-Term(TMT6plex)	CID	1	0	1	947800	541000	847000	639300	643200	705700	No Proteins	Not Used	11315	0	8.82e-06	2378	2431	5.36	0	8574000	2	1064.1	2127.2	0	4.54	0.93	4016	4017	MS2	0/0	0	0	2ms21_2014_479_PFL_Fr1.mgf			947800	541000	847000	639300	643200
High	A	eFLEDTcVQYVQk	6167	Unambiguous	Endothelial protein C receptor OS=Homo sapiens GN=PROCR PE=1 SV=1 - [EPCR_HUMAN]	1	1	Q9UNN8	N-Term(TMT6plex); C7(Carbamidomethyl); K13(TMT6plex)	CID	1	0	1		25410	12450	17420	22460	27200	No Quan Values	Not Used	11316	0.002	0.0842	1957	1897	1.85	0	370700	3	706.372	2117.1	0	1.53	0.93	4018	4019	MS2	0/0	0	0	2ms21_2014_479_PFL_Fr1.mgf				25410	12450	17420	22460
High	A	eIVLTQSPATLSLSPGER	6254	Unambiguous		0	0		N-Term(TMT6plex)	CID	1	0	1				25770			No Proteins	Not Used	11318	0	0.000588	2485	2564	3.31	0	2740000	3	709.734	2127.19	0	1.23	0.93	4024	4025	MS2	0/0	0	0	2ms21_2014_479_PFL_Fr1.mgf						25770
High	A	eIGELYLPk	5976	Unambiguous	Alpha-1-antichymotrypsin OS=Homo sapiens GN=SERPINA3 PE=1 SV=2 - [AACT_HUMAN]	3	1	P01011	N-Term(TMT6plex); K9(TMT6plex)	CID	1	0	1	215100	350700	304700	246800	226200	392000	Unique	Used	11328	0.002	0.0329	1756	1740	2.78	0	2494000	2	760.461	1519.92	0	1.11	0.93	4046	4047	MS2	0/0	0	0	2ms21_2014_479_PFL_Fr1.mgf			215100	350700	304700	246800	226200
High	A	aNPTVTLFPPSSEELQANk	6200	Unambiguous		0	0		N-Term(TMT6plex); K19(TMT6plex)	CID	1	0	1	96880	128600	186600	142900	136600	139300	No Proteins	Not Used	11337	0	7.3e-05	3131	3245	4.41	0	3944000	3	834.461	2501.37	0	0.83	0.93	4068	4069	MS2	0/0	0	0	2ms21_2014_479_PFL_Fr1.mgf			96880	128600	186600	142900	136600
High	A	dSTYSLSSTLTLSk	4222	Unambiguous	Epididymis luminal protein 213 OS=Homo sapiens GN=HEL-213 PE=2 SV=1 - [V9HW34_HUMAN]|Protein IGKV3-11 OS=Homo sapiens GN=IGKV3-11 PE=4 SV=1 - [A0A087WZW8_HUMAN]	16	2	V9HW34;A0A087WZW8	N-Term(TMT6plex); K14(TMT6plex)	CID	1	0	1	210500	142400	171700	151300	148900	233000	Not Unique	Not Used	11342	0.001	0.00369	2400	2381	2.05	0	3018000	3	654.366	1961.08	0	0.05	0.93	4079	4080	MS2	0/0	0	0	2ms21_2014_479_PFL_Fr1.mgf			210500	142400	171700	151300	148900
High	A	dSTYSLSSTLTLSk	4222	Unambiguous	Epididymis luminal protein 213 OS=Homo sapiens GN=HEL-213 PE=2 SV=1 - [V9HW34_HUMAN]|Protein IGKV3-11 OS=Homo sapiens GN=IGKV3-11 PE=4 SV=1 - [A0A087WZW8_HUMAN]	16	2	V9HW34;A0A087WZW8	N-Term(TMT6plex); K14(TMT6plex)	CID	1	0	1	7723000	4803000	6324000	4620000	5176000	7449000	Not Unique	Not Used	11347	0	0.000256	2432	2397	5.06	0	49360000	2	981.047	1961.09	0	0.9	0.93	4090	4091	MS2	0/0	0	0	2ms21_2014_479_PFL_Fr1.mgf			7723000	4803000	6324000	4620000	5176000
High	A	lGTFEVEDQIEAAR	6398	Unambiguous		0	0		N-Term(TMT6plex)	CID	1	0	1	344800	747900	591300	357900	541300	853100	No Proteins	Not Used	11350	0.001	0.00431	1487	1556	3.08	0	5368000	2	903.972	1806.94	0	-4.16	0.95	4096	4097	MS2	0/0	0	0	2ms21_2014_479_PFL_Fr1.mgf			344800	747900	591300	357900	541300
High	A	eIVLTQSPGTLSLSPGER	5602	Unambiguous	Myosin-reactive immunoglobulin light chain variable region (Fragment) OS=Homo sapiens PE=2 SV=1 - [Q9UL78_HUMAN]	1	1	Q9UL78	N-Term(TMT6plex)	CID	1	0	1	424500	291300	370100	324900	328700	378500	Unique	Used	11351	0	0.00121	2426	2452	4.92	0	4985000	2	1057.09	2113.17	0	1.15	0.95	4098	4099	MS2	0/0	0	0	2ms21_2014_479_PFL_Fr1.mgf			424500	291300	370100	324900	328700
High	A	tMLLQPAGSLGSYSYR	4743	Unambiguous	Prostaglandin-H2 D-isomerase OS=Homo sapiens GN=PTGDS PE=1 SV=1 - [PTGDS_HUMAN]	4	1	P41222	N-Term(TMT6plex)	CID	1	0	1	2791000	2130000	1802000	2692000	1488000	3076000	Unique	Used	11352	0	0.0015	1800	1755	3.47	0	25760000	2	987.022	1973.04	0	-0.31	0.95	4101	4102	MS2	0/0	0	0	2ms21_2014_479_PFL_Fr1.mgf			2791000	2130000	1802000	2692000	1488000
High	A	tMLLQPAGSLGSYSYR	4743	Unambiguous	Prostaglandin-H2 D-isomerase OS=Homo sapiens GN=PTGDS PE=1 SV=1 - [PTGDS_HUMAN]	4	1	P41222	N-Term(TMT6plex)	CID	1	0	1	81370	73400	41820			80900	Unique	Used	11353	0	0.000138	1841	1810	3.17	0	1530000	3	658.351	1973.04	0	1.05	0.95	4103	4104	MS2	0/0	0	0	2ms21_2014_479_PFL_Fr1.mgf			81370	73400	41820
High	A	wTELAGcTADFR	6415	Unambiguous	Vesicular integral-membrane protein VIP36 (Fragment) OS=Homo sapiens GN=LMAN2 PE=1 SV=3 - [D6RIU4_HUMAN]	6	1	D6RIU4	N-Term(TMT6plex); C7(Carbamidomethyl)	CID	1	0	1	16560			12230			Unique	Used	11354	0	0.000754	532	491	3.95	0	222500	3	552.607	1655.81	0	0.66	0.95	4105	4106	MS2	0/0	0	0	2ms21_2014_479_PFL_Fr1.mgf			16560			12230
High	A	lTPGLYEFk	6440	Unambiguous		0	0		N-Term(TMT6plex); K9(TMT6plex)	CID	1	0	1	134700	127500	109100	162000	97190	139900	No Proteins	Not Used	11361	0.001	0.0174	1269	1219	2.99	0	1201000	2	763.456	1525.9	0	1.23	0.95	4120	4121	MS2	0/0	0	0	2ms21_2014_479_PFL_Fr1.mgf			134700	127500	109100	162000	97190
High	A	aDEGWYWcGVk	6460	Unambiguous	Polymeric immunoglobulin receptor OS=Homo sapiens GN=PIGR PE=1 SV=4 - [PIGR_HUMAN]	1	1	P01833	N-Term(TMT6plex); C8(Carbamidomethyl); K11(TMT6plex)	CID	1	0	1	1806000	1736000	1811000	1981000	1471000	1671000	Unique	Used	11367	0	0.00146	969	967	4.8	0	13350000	2	914.959	1828.91	0	0.82	0.95	4134	4135	MS2	0/0	0	0	2ms21_2014_479_PFL_Fr1.mgf			1806000	1736000	1811000	1981000	1471000
High	A	qLELYLPk	6475	Unambiguous	Plasma serine protease inhibitor OS=Homo sapiens GN=SERPINA5 PE=1 SV=3 - [IPSP_HUMAN]	1	1	P05154	N-Term(TMT6plex); K8(TMT6plex)	CID	1	0	1	608700	617200	339600	524000	278900	419500	Unique	Used	11370	0.002	0.0439	1312	1363	3.16	0	4736000	2	731.458	1461.91	0	0.98	0.95	4140	4141	MS2	0/0	0	0	2ms21_2014_479_PFL_Fr1.mgf			608700	617200	339600	524000	278900
High	A	vTSIQDWVQk	6483	Unambiguous	Haptoglobin OS=Homo sapiens GN=HP PE=1 SV=1 - [HPT_HUMAN]	3	1	P00738	N-Term(TMT6plex); K10(TMT6plex)	CID	1	0	1	132000	1939000	563400	106000	243300	1942000	Unique	Used	11372	0.001	0.00657	2247	2085	2.44	0	10520000	3	554.659	1661.96	0	-0.28	0.95	4145	4146	MS2	0/0	0	0	2ms21_2014_479_PFL_Fr1.mgf			132000	1939000	563400	106000	243300
High	A	aQGFTEDTIVFLPQTDk	5298	Unambiguous	Prostaglandin-H2 D-isomerase OS=Homo sapiens GN=PTGDS PE=1 SV=1 - [PTGDS_HUMAN]	2	1	P41222	N-Term(TMT6plex); K17(TMT6plex)	CID	1	0	1	177900	169600	239500	154000	220300	276100	Unique	Used	11375	0.001	0.00928	3002	3042	3.22	0	3957000	3	790.101	2368.29	0	3.76	0.95	4151	4152	MS2	0/0	0	0	2ms21_2014_479_PFL_Fr1.mgf			177900	169600	239500	154000	220300
High	A	tPSAAYLWVGTGASEAEk	6501	Unambiguous	cDNA FLJ35478 fis, clone SMINT2007796, highly similar to Gelsolin OS=Homo sapiens PE=2 SV=1 - [B3KS49_HUMAN]	13	1	B3KS49	N-Term(TMT6plex); K18(TMT6plex)	CID	1	0	1	57430	104900	46540	37840	45990	102600	Unique	Used	11378	0.005	0.159	2757	2724	3.56	0	955500	3	766.078	2296.22	0	-0.9	0.95	4158	4159	MS2	0/0	0	0	2ms21_2014_479_PFL_Fr1.mgf			57430	104900	46540	37840	45990
High	A	aDEGWYWcGVk	6460	Unambiguous	Polymeric immunoglobulin receptor OS=Homo sapiens GN=PIGR PE=1 SV=4 - [PIGR_HUMAN]	1	1	P01833	N-Term(TMT6plex); C8(Carbamidomethyl); K11(TMT6plex)	CID	1	0	1	11020000	9993000	11200000	13380000	9786000	10080000	Unique	Used	11379	0	0.000268	970	964	3.37	0	81250000	2	914.959	1828.91	0	0.62	0.95	4160	4161	MS2	0/0	0	0	2ms21_2014_479_PFL_Fr1.mgf			11020000	9993000	11200000	13380000	9786000
High	A	aLYLQYTDETFR	6517	Unambiguous	cDNA FLJ76826, highly similar to Homo sapiens ceruloplasmin (ferroxidase) (CP), mRNA OS=Homo sapiens PE=2 SV=1 - [A8K5A4_HUMAN]	5	1	A8K5A4	N-Term(TMT6plex)	CID	1	0	1	676900	1996000	1015000	345600	1210000	2273000	Unique	Used	11382	0	0.00288	1313	1339	4.94	0	12710000	2	874.958	1748.91	0	1.81	0.95	4167	4168	MS2	0/0	0	0	2ms21_2014_479_PFL_Fr1.mgf			676900	1996000	1015000	345600	1210000
High	A	tPSAAYLWVGTGASEAEk	6501	Unambiguous	cDNA FLJ35478 fis, clone SMINT2007796, highly similar to Gelsolin OS=Homo sapiens PE=2 SV=1 - [B3KS49_HUMAN]	13	1	B3KS49	N-Term(TMT6plex); K18(TMT6plex)	CID	1	0	1	1309000	686000	922100	1139000	544600	901800	Unique	Used	11383	0	3.15e-06	2802	2731	5.84	0	8754000	2	1148.62	2296.23	0	2.59	0.95	4169	4170	MS2	0/0	0	0	2ms21_2014_479_PFL_Fr1.mgf			1309000	686000	922100	1139000	544600
High	A	aAPSVTLFPPSSEELQANk	6035	Unambiguous	Uncharacterized protein OS=Homo sapiens PE=2 SV=1 - [Q6GMV8_HUMAN]	32	1	Q6GMV8	N-Term(TMT6plex); K19(TMT6plex)	CID	1	0	1	1747000	1630000	1896000	1044000	1291000	1804000	Unique	Used	11387	0	1.81e-05	2971	3075	4.52	0	15460000	2	1222.68	2444.35	0	2.59	0.95	4178	4179	MS2	0/0	0	0	2ms21_2014_479_PFL_Fr1.mgf			1747000	1630000	1896000	1044000	1291000
High	A	qEILAALEk	6554	Unambiguous	cDNA FLJ54596, highly similar to Proactivator polypeptide OS=Homo sapiens PE=2 SV=1 - [B4DEK5_HUMAN]	8	1	B4DEK5	N-Term(TMT6plex); K9(TMT6plex)	CID	1	0	1	1119000	1179000	1745000	1442000	1422000	1438000	Unique	Used	11392	0.001	0.015	1421	1431	3.6	0	11010000	2	736.96	1472.91	0	1.96	0.95	4189	4190	MS2	0/0	0	0	2ms21_2014_479_PFL_Fr1.mgf			1119000	1179000	1745000	1442000	1422000
High	A	tITLEVEPSDTIENVk	6558	Unambiguous		0	0		N-Term(TMT6plex); K16(TMT6plex)	CID	1	0	1	778300	701100	655500	1047000	542600	618300	No Proteins	Not Used	11393	0	5.66e-06	2881	2817	4.83	0	6880000	2	1123.63	2246.25	0	-0.77	0.95	4191	4192	MS2	0/0	0	0	2ms21_2014_479_PFL_Fr1.mgf			778300	701100	655500	1047000	542600
High	A	aSLIEYIk	6570	Unambiguous		0	0		N-Term(TMT6plex); K8(TMT6plex)	CID	1	0	1	1414000	893100	1022000	1854000	853800	889100	No Proteins	Not Used	11396	0.002	0.044	945	910	3.09	0	8299000	2	697.937	1394.87	0	0.74	0.95	4197	4198	MS2	0/0	0	0	2ms21_2014_479_PFL_Fr1.mgf			1414000	893100	1022000	1854000	853800
High	A	vFMYLSDSR	6063	Unambiguous	cDNA FLJ38724 fis, clone KIDNE2010151, highly similar to UROMODULIN OS=Homo sapiens PE=2 SV=1 - [B3KTU0_HUMAN]	8	1	B3KTU0	N-Term(TMT6plex)	CID	1	0	1	227800	251400	51470	294600	441800	230600	Unique	Used	11398	0.002	0.046	729	686	2.95	0	2353000	2	673.854	1346.7	0	2.21	0.95	4202	4203	MS2	0/0	0	0	2ms21_2014_479_PFL_Fr1.mgf			227800	251400	51470	294600	441800
High	A	aLYLQYTDETFR	6517	Unambiguous	cDNA FLJ76826, highly similar to Homo sapiens ceruloplasmin (ferroxidase) (CP), mRNA OS=Homo sapiens PE=2 SV=1 - [A8K5A4_HUMAN]	5	1	A8K5A4	N-Term(TMT6plex)	CID	1	0	1	14170	10340		10330	9618	12800	Unique	Used	11399	0	0.00296	1220	1233	3.16	0	215400	3	583.64	1748.91	0	-0.12	0.95	4204	4205	MS2	0/0	0	0	2ms21_2014_479_PFL_Fr1.mgf			14170	10340		10330	9618
High	A	gEGWGDPcELcPTEPDEAFR	6582	Unambiguous	Fibrillin 1 variant (Fragment) OS=Homo sapiens PE=2 SV=1 - [Q59HB9_HUMAN]	4	1	Q59HB9	N-Term(TMT6plex); C8(Carbamidomethyl); C11(Carbamidomethyl)	CID	1	0	1	128300	120200	93150	190700	88120	118900	Unique	Used	11400	0.001	0.0183	130	152	4.5	0	2063000	2	1276.06	2551.12	0.01	5.13	0.95	4206	4207	MS2	0/0	0	0	2ms21_2014_479_PFL_Fr1.mgf			128300	120200	93150	190700	88120
High	A	dLcGcYSVSSVLPGcAEPWNHGk	6597	Unambiguous	Ig alpha-1 chain C region OS=Homo sapiens GN=IGHA1 PE=1 SV=2 - [IGHA1_HUMAN]	9	1	P01876	N-Term(TMT6plex); C3(Carbamidomethyl); C5(Carbamidomethyl); C15(Carbamidomethyl); K23(TMT6plex)	CID	1	0	1	74550	106300	136600	47960	114500	124100	Unique	Used	11403	0	1.23e-06	1136	1173	7	0	3702000	3	1017.82	3051.46	0	1.8	0.97	4213	4214	MS2	0/0	0	0	2ms21_2014_479_PFL_Fr1.mgf			74550	106300	136600	47960	114500
Middle	A	eNETFRPGGGNMk	6624	Unambiguous		0	0		N-Term(TMT6plex); K13(TMT6plex)	CID	1	0	1	20800		14010	15900			No Proteins	Not Used	11408	0.028	0.438	1554	1442	1.98	0	217800	3	632.33	1894.98	0	-4.85	0.97	4224	4225	MS2	0/0	0	0	2ms21_2014_479_PFL_Fr1.mgf			20800		14010	15900
High	A	vLSNTEDLPLVTk	6638	Unambiguous		0	0		N-Term(TMT6plex); K13(TMT6plex)	CID	1	0	1	3737000	2143000	4318000	7080000	2404000	4016000	No Proteins	Not Used	11412	0	0.000313	2016	1998	5.34	0	34730000	2	944.064	1887.12	0	0.35	0.97	4233	4234	MS2	0/0	0	0	2ms21_2014_479_PFL_Fr1.mgf			3737000	2143000	4318000	7080000	2404000
High	A	aGYIIPLQGPGLTTTESR	6642	Unambiguous	Glucosidase, alpha acid (Pompe disease, glycogen storage disease type II), isoform CRA_a OS=Homo sapiens GN=GAA PE=3 SV=1 - [A0A024R8Q1_HUMAN]	2	1	A0A024R8Q1	N-Term(TMT6plex)	CID	1	0	1	607200	822600	1706000	1040000	901200	1045000	Unique	Used	11413	0	1.17e-05	2924	2794	5.14	0	12820000	2	1052.09	2103.17	0	2.34	0.97	4235	4236	MS2	0/0	0	0	2ms21_2014_479_PFL_Fr1.mgf			607200	822600	1706000	1040000	901200
High	A	aGYIIPLQGPGLTTTESR	6642	Unambiguous	Glucosidase, alpha acid (Pompe disease, glycogen storage disease type II), isoform CRA_a OS=Homo sapiens GN=GAA PE=3 SV=1 - [A0A024R8Q1_HUMAN]	2	1	A0A024R8Q1	N-Term(TMT6plex)	CID	1	0	1	39350	61800	46810	56090	48490	60860	Unique	Used	11414	0.002	0.0952	2990	2841	3.67	0	847200	3	701.729	2103.17	0	2.94	0.97	4237	4238	MS2	0/0	0	0	2ms21_2014_479_PFL_Fr1.mgf			39350	61800	46810	56090	48490
High	A	gEYFVEMYYR	6658	Unambiguous	Prostatic acid phosphatase OS=Homo sapiens GN=ACPP PE=1 SV=3 - [PPAP_HUMAN]	2	1	P15309	N-Term(TMT6plex)	CID	1	0	1	658900	330400	265900	402400	355600	228700	Unique	Used	11417	0.001	0.0102	329	338	3.53	0	3732000	2	793.382	1585.76	0	0.18	0.97	4244	4245	MS2	0/0	0	0	2ms21_2014_479_PFL_Fr1.mgf			658900	330400	265900	402400	355600
High	A	fSGTWYAMAk	6677	Unambiguous	Retinol binding protein 4, plasma, isoform CRA_b OS=Homo sapiens GN=RBP4 PE=1 SV=2 - [Q5VY30_HUMAN]	2	1	Q5VY30	N-Term(TMT6plex); K10(TMT6plex)	CID	1	0	1	1625000	1530000	1133000	2132000	1066000	1774000	Unique	Used	11422	0.001	0.0304	1521	1492	2.9	0	12260000	2	810.436	1619.86	0	-0.98	0.97	4255	4256	MS2	0/0	0	0	2ms21_2014_479_PFL_Fr1.mgf			1625000	1530000	1133000	2132000	1066000
High	A	gQVPENEANVVITTLk	6682	Unambiguous	Cadherin-1 OS=Homo sapiens GN=CDH1 PE=1 SV=1 - [H3BNC6_HUMAN]	9	1	H3BNC6	N-Term(TMT6plex); K16(TMT6plex)	CID	1	0	1	2911000	2028000	1770000	2160000	1294000	2226000	Unique	Used	11424	0	5.8e-05	1935	1990	5.55	0	18850000	2	1085.63	2170.26	0	3.33	0.97	4259	4260	MS2	0/0	0	0	2ms21_2014_479_PFL_Fr1.mgf			2911000	2028000	1770000	2160000	1294000
High	A	eVTVPVFYPTEk	6703	Unambiguous	Isoform 2 of Cell surface glycoprotein MUC18 OS=Homo sapiens GN=MCAM - [MUC18_HUMAN]	5	1	P43121-2	N-Term(TMT6plex); K12(TMT6plex)	CID	1	0	1	734100	482800	384200	625900	426300	614200	Unique	Used	11427	0.001	0.00615	2069	2004	4.4	0	5171000	2	934.037	1867.07	0	2.77	0.97	4266	4267	MS2	0/0	0	0	2ms21_2014_479_PFL_Fr1.mgf			734100	482800	384200	625900	426300
High	A	tLmFGSYLDDEk	6725	Unambiguous	Alpha-1-acid glycoprotein 2 OS=Homo sapiens GN=ORM2 PE=1 SV=2 - [A1AG2_HUMAN]	1	1	P19652	N-Term(TMT6plex); M3(Oxidation); K12(TMT6plex)	CID	1	0	1	361600	937600	708700	638600	730300	1063000	Unique	Used	11432	0	0.000168	1546	1462	3.22	0	6671000	2	946.989	1892.97	0	-0.28	0.97	4277	4278	MS2	0/0	0	0	2ms21_2014_479_PFL_Fr1.mgf			361600	937600	708700	638600	730300
High	A	iQIPGIMNDEk	6729	Unambiguous	Isoform 2 of Hepatitis A virus cellular receptor 2 OS=Homo sapiens GN=HAVCR2 - [HAVR2_HUMAN]	3	1	Q8TDQ0-2	N-Term(TMT6plex); K11(TMT6plex)	CID	1	0	1	18340	19610	11820	21490	17510	17120	Unique	Used	11433	0	0.00262	2010	2099	3.16	0	388300	3	572.665	1715.98	0	1.73	0.97	4279	4280	MS2	0/0	0	0	2ms21_2014_479_PFL_Fr1.mgf			18340	19610	11820	21490	17510
High	A	gDVDPFYYDYETVR	6746	Unambiguous		0	0		N-Term(TMT6plex)	CID	1	0	1	823000	415300	515000	1223000	456100	771200	No Proteins	Not Used	11437	0	0.00122	496	447	2.86	0	7785000	2	984.468	1967.93	0	2.75	0.97	4288	4289	MS2	0/0	0	0	2ms21_2014_479_PFL_Fr1.mgf			823000	415300	515000	1223000	456100
High	A	lAEFGAEFk	6750	Unambiguous	cDNA FLJ54235, highly similar to Ceroid-lipofuscinosis neuronal protein 5 OS=Homo sapiens PE=2 SV=1 - [B4E1V6_HUMAN]	3	1	B4E1V6	N-Term(TMT6plex); K9(TMT6plex)	CID	1	0	1	333400	372400	532700	505500	365500	449500	Unique	Used	11438	0.001	0.0199	1168	1224	3.88	0	4234000	2	735.427	1469.85	0	4.24	0.97	4290	4291	MS2	0/0	0	0	2ms21_2014_479_PFL_Fr1.mgf			333400	372400	532700	505500	365500
High	A	gGTLGTPQTGSENDALYEYLR	6774	Unambiguous	Tetranectin OS=Homo sapiens GN=CLEC3B PE=4 SV=1 - [E9PHK0_HUMAN]	2	1	E9PHK0	N-Term(TMT6plex)	CID	1	0	1	127000	49950	66420	230100	41150	57380	Unique	Used	11443	0	0.00251	1323	1373	3.68	0	1200000	2	1236.11	2471.22	0	-1.52	0.97	4301	4302	MS2	0/0	0	0	2ms21_2014_479_PFL_Fr1.mgf			127000	49950	66420	230100	41150
High	A	dLMVLNDVYR	6798	Unambiguous	Aminopeptidase N OS=Homo sapiens GN=ANPEP PE=1 SV=4 - [AMPN_HUMAN]	3	1	P15144	N-Term(TMT6plex)	CID	1	0	1	873300	648300	823300	742600	696500	698100	Unique	Used	11449	0.001	0.0067	1277	1239	3.83	0	7504000	2	733.898	1466.79	0	1.41	0.97	4314	4315	MS2	0/0	0	0	2ms21_2014_479_PFL_Fr1.mgf			873300	648300	823300	742600	696500
High	A	vTImWTPPESAVTGYR	6813	Unambiguous	Putative uncharacterized protein DKFZp686O12165 (Fragment) OS=Homo sapiens GN=DKFZp686O12165 PE=1 SV=1 - [Q6MZM7_HUMAN]	3	1	Q6MZM7	N-Term(TMT6plex); M4(Oxidation)	CID	1	0	1	201800	184300	152600	281600	206600	205700	Unique	Used	11453	0	0.000522	1800	1767	3.99	0	3754000	2	1027.03	2053.06	0	-2.08	0.98	4323	4324	MS2	0/0	0	0	2ms21_2014_479_PFL_Fr1.mgf			201800	184300	152600	281600	206600
High	A	iLLDEQAQWk	6828	Unambiguous	Intercellular adhesion molecule 2 (Fragment) OS=Homo sapiens GN=ICAM2 PE=4 SV=3 - [J3QQR8_HUMAN]	8	1	J3QQR8	N-Term(TMT6plex); K10(TMT6plex)	CID	1	0	1	3484000	2688000	1704000	2877000	1685000	2518000	Unique	Used	11457	0.001	0.00459	2039	2080	4.42	0	19880000	2	851.503	1702	0	2.17	0.98	4332	4333	MS2	0/0	0	0	2ms21_2014_479_PFL_Fr1.mgf			3484000	2688000	1704000	2877000	1685000
High	A	aLQDQLVLVAAk	6832	Unambiguous	cDNA FLJ53950, highly similar to Angiotensinogen OS=Homo sapiens PE=2 SV=1 - [B4E1B3_HUMAN]	7	1	B4E1B3	N-Term(TMT6plex); K12(TMT6plex)	CID	1	0	1	2353000	3063000	2143000	2242000	2554000	2989000	Unique	Used	11458	0	0.000185	857	776	3.81	0	21130000	2	864.047	1727.09	0	1.62	0.98	4334	4335	MS2	0/0	0	0	2ms21_2014_479_PFL_Fr1.mgf			2353000	3063000	2143000	2242000	2554000
High	A	iLLDEQAQWk	6828	Unambiguous	Intercellular adhesion molecule 2 (Fragment) OS=Homo sapiens GN=ICAM2 PE=4 SV=3 - [J3QQR8_HUMAN]	8	1	J3QQR8	N-Term(TMT6plex); K10(TMT6plex)	CID	1	0	1	17470	15990	12190	24810	12510	30730	Unique	Used	11461	0.001	0.0107	2043	2053	2.78	0	237900	3	568.002	1701.99	0	-0.74	0.98	4340	4341	MS2	0/0	0	0	2ms21_2014_479_PFL_Fr1.mgf			17470	15990	12190	24810	12510
High	A	gQWGTVcDDGWDIk	6849	Unambiguous		0	0		N-Term(TMT6plex); C7(Carbamidomethyl); K14(TMT6plex)	CID	1	0	1	598800	431500	325200	775400	393800	418800	No Proteins	Not Used	11463	0.001	0.013	1315	1378	3.37	0	4920000	2	1048.03	2095.05	0.01	7.13	0.98	4345	4346	MS2	0/0	0	0	2ms21_2014_479_PFL_Fr1.mgf			598800	431500	325200	775400	393800
High	A	lEELLSk	6857	Unconsidered		0	0		N-Term(TMT6plex); K7(TMT6plex)	CID	1	0	1	155800	141700	232800	295000	120600	249000	No Proteins	Not Used	11465	0.002	0.0354	1397	1424	2.55	0	1433000	2	645.408	1289.81	0	0.5	0.98	4349	4350	MS2	0/0	0	0	2ms21_2014_479_PFL_Fr1.mgf			155800	141700	232800	295000	120600
High	A	iEEIxSk	6857	Unconsidered		0	0		N-Term(TMT6plex); X5(L); K7(TMT6plex)	CID	1	0	1	155800	141700	232800	295000	120600	249000	No Proteins	Not Used	11465	0.002	0.0354	1397	1424	2.55	0	1433000	2	645.408	1289.81	0	0.5	0.98	4349	4350	MS2	0/0	0	0	2ms21_2014_479_PFL_Fr1.mgf			155800	141700	232800	295000	120600
High	A	sLTLGIEPVSPTSLR	6864	Unambiguous		0	0		N-Term(TMT6plex)	CID	1	0	1	1885000	1487000	1310000	809600	863500	1702000	No Proteins	Not Used	11466	0	0.000873	1891	1854	4.85	0	13810000	2	900.027	1799.05	0	-0.95	0.98	4351	4352	MS2	0/0	0	0	2ms21_2014_479_PFL_Fr1.mgf			1885000	1487000	1310000	809600	863500
High	A	sLTLGIEPVSPTSLR	6864	Unambiguous		0	0		N-Term(TMT6plex)	CID	1	0	1			20630				No Proteins	Not Used	11467	0	0.000164	1872	1844	3.75	0	86940	3	600.354	1799.05	0	0.71	0.98	4354	4355	MS2	0/0	0	0	2ms21_2014_479_PFL_Fr1.mgf					20630
High	A	cPLGVPLVLDGcGccR	6872	Unambiguous		0	0		N-Term(TMT6plex); C1(Carbamidomethyl); C12(Carbamidomethyl); C14(Carbamidomethyl); C15(Carbamidomethyl)	CID	1	0	1	186300	204800	229000	333000	160200	250000	No Proteins	Not Used	11468	0	0.000205	585	582	3.89	0	3410000	2	1031.5	2061.99	0	-1.03	0.98	4356	4357	MS2	0/0	0	0	2ms21_2014_479_PFL_Fr1.mgf			186300	204800	229000	333000	160200
High	A	vFSNGADLSGVTEEAPLk	6876	Unambiguous	Alpha-1-antitrypsin OS=Homo sapiens GN=SERPINA1 PE=1 SV=3 - [A1AT_HUMAN]	3	1	P01009	N-Term(TMT6plex); K18(TMT6plex)	CID	1	0	1	92170	389400	228100	74470	375500	306600	Unique	Used	11469	0	7.11e-05	2901	3080	5.52	0	2610000	2	1146.64	2292.27	0.01	11.39	0.98	4358	4359	MS2	0/0	0	0	2ms21_2014_479_PFL_Fr1.mgf			92170	389400	228100	74470	375500
High	A	vIPAcLPSPNYVVADR	6884	Unambiguous	cDNA FLJ58778, highly similar to Plasminogen (EC 3.4.21.7) OS=Homo sapiens PE=2 SV=1 - [B4DPH4_HUMAN]	3	1	B4DPH4	N-Term(TMT6plex); C5(Carbamidomethyl)	CID	1	0	1	18750	18790	23460	18800	13820	25220	Unique	Used	11471	0.001	0.00875	2266	2322	3.48	0	1342000	2	1000.55	2000.09	0	4.97	0.98	4362	4363	MS2	0/0	0	0	2ms21_2014_479_PFL_Fr1.mgf			18750	18790	23460	18800	13820
High	A	cPLGVPLVLDGcGccR	6872	Unambiguous		0	0		N-Term(TMT6plex); C1(Carbamidomethyl); C12(Carbamidomethyl); C14(Carbamidomethyl); C15(Carbamidomethyl)	CID	1	0	1	28520	15780	40720	47680	16320	26940	No Proteins	Not Used	11475	0.002	0.0464	617	605	2.94	0	402600	3	688.002	2061.99	0	0.59	0.98	4371	4372	MS2	0/0	0	0	2ms21_2014_479_PFL_Fr1.mgf			28520	15780	40720	47680	16320
High	A	vNYGAYINDFk	6904	Unambiguous	Isoform 3 of Beta-galactosidase OS=Homo sapiens GN=GLB1 - [BGAL_HUMAN]	8	1	P16278-3	N-Term(TMT6plex); K11(TMT6plex)	CID	1	0	1	1586000	1691000	2249000	2101000	1269000	2030000	Unique	Used	11477	0	0.000485	2119	2179	4.13	0	14280000	2	881.484	1761.96	0	1.21	0.98	4376	4377	MS2	0/0	0	0	2ms21_2014_479_PFL_Fr1.mgf			1586000	1691000	2249000	2101000	1269000
High	A	vNYGAYINDFk	6904	Unambiguous	Isoform 3 of Beta-galactosidase OS=Homo sapiens GN=GLB1 - [BGAL_HUMAN]	8	1	P16278-3	N-Term(TMT6plex); K11(TMT6plex)	CID	1	0	1	9778	19070		17280	17260	23840	Unique	Used	11481	0.002	0.0374	1906	2013	1.87	0	411300	3	587.989	1761.95	0	-2.92	0.98	4384	4385	MS2	0/0	0	0	2ms21_2014_479_PFL_Fr1.mgf			9778	19070		17280	17260
High	A	eSGTDDFNVWIGLHDPk	6944	Unambiguous	cDNA FLJ75763, highly similar to Homo sapiens regenerating islet-derived 1 alpha (pancreatic stone protein, pancreatic thread protein) (REG1A), mRNA OS=Homo sapiens PE=2 SV=1 - [A8K7G6_HUMAN]	2	1	A8K7G6	N-Term(TMT6plex); K17(TMT6plex)	CID	1	0	1	548100	244600	485300	381400	210200	267800	Unique	Used	11487	0	6.03e-06	2143	2096	4.8	0	5848000	3	796.748	2388.23	0	2.62	0.98	4398	4399	MS2	0/0	0	0	2ms21_2014_479_PFL_Fr1.mgf			548100	244600	485300	381400	210200
High	A	dIPTNSPELEETLTHTITk	6948	Unambiguous	cDNA FLJ53075, highly similar to Kininogen-1 OS=Homo sapiens PE=2 SV=1 - [B4DPP8_HUMAN]	6	1	B4DPP8	N-Term(TMT6plex); K19(TMT6plex)	CID	1	0	1	4998000	2579000	2804000	5001000	2717000	2754000	Unique	Used	11488	0	0.00012	3126	3142	5.83	0	56030000	3	866.475	2597.41	0	0.68	0.98	4400	4401	MS2	0/0	0	0	2ms21_2014_479_PFL_Fr1.mgf			4998000	2579000	2804000	5001000	2717000
High	A	iMGITLVSk	6961	Unambiguous	Lymphatic vessel endothelial hyaluronic acid receptor 1 OS=Homo sapiens GN=LYVE1 PE=1 SV=2 - [LYVE1_HUMAN]	1	1	Q9Y5Y7	N-Term(TMT6plex); K9(TMT6plex)	CID	1	0	1	359500	528900	307400	312600	275800	518600	Unique	Used	11492	0.001	0.00521	963	925	3.66	0	2900000	2	710.454	1419.9	0	0.13	0.98	4409	4410	MS2	0/0	0	0	2ms21_2014_479_PFL_Fr1.mgf			359500	528900	307400	312600	275800
High	A	dIPTNSPELEETLTHTITk	6948	Unambiguous	cDNA FLJ53075, highly similar to Kininogen-1 OS=Homo sapiens PE=2 SV=1 - [B4DPP8_HUMAN]	6	1	B4DPP8	N-Term(TMT6plex); K19(TMT6plex)	CID	1	0	1	461300	261400	253700	472000	263800	269300	Unique	Used	11493	0	0.000905	3066	3096	5.59	0	4068000	2	1299.2	2597.4	0	-3.57	0.98	4411	4412	MS2	0/0	0	0	2ms21_2014_479_PFL_Fr1.mgf			461300	261400	253700	472000	263800
High	A	dSTYSLSSTLTLSk	4222	Unambiguous	Epididymis luminal protein 213 OS=Homo sapiens GN=HEL-213 PE=2 SV=1 - [V9HW34_HUMAN]|Protein IGKV3-11 OS=Homo sapiens GN=IGKV3-11 PE=4 SV=1 - [A0A087WZW8_HUMAN]	16	2	V9HW34;A0A087WZW8	N-Term(TMT6plex); K14(TMT6plex)	CID	1	0	1	1205000	770800	970400	859400	884600	1095000	Not Unique	Not Used	11496	0.002	0.0455	2432	2397	1.65	0	9526000	3	654.367	1961.09	0	1.08	0.98	4418	4419	MS2	0/0	0	0	2ms21_2014_479_PFL_Fr1.mgf			1205000	770800	970400	859400	884600
High	A	dSTYSLSSTLTLSk	4222	Unambiguous	Epididymis luminal protein 213 OS=Homo sapiens GN=HEL-213 PE=2 SV=1 - [V9HW34_HUMAN]|Protein IGKV3-11 OS=Homo sapiens GN=IGKV3-11 PE=4 SV=1 - [A0A087WZW8_HUMAN]	16	2	V9HW34;A0A087WZW8	N-Term(TMT6plex); K14(TMT6plex)	CID	1	0	1	10070000	5896000	8091000	5968000	5770000	8827000	Not Unique	Not Used	11501	0	0.000561	2419	2391	5.02	0	60750000	2	981.046	1961.09	0	0.59	0.98	4429	4430	MS2	0/0	0	0	2ms21_2014_479_PFL_Fr1.mgf			10070000	5896000	8091000	5968000	5770000
High	A	dGDNNLAQQLAVLcGR	7019	Unambiguous	Intrinsic factor-vitamin B12 receptor (Fragment) OS=Homo sapiens GN=CUBN PE=4 SV=1 - [Q7LC53_HUMAN]	2	1	Q7LC53	N-Term(TMT6plex); C14(Carbamidomethyl)	CID	1	0	1	615600	586200	774500	594400	641100	680300	Unique	Used	11506	0	3.49e-05	1461	1405	5.56	0	6497000	2	987.009	1973.01	0	2.15	1	4440	4441	MS2	0/0	0	0	2ms21_2014_479_PFL_Fr1.mgf			615600	586200	774500	594400	641100
High	A	dLVGELGTALR	7023	Unambiguous		0	0		N-Term(TMT6plex)	CID	1	0	1	1026000	438500	763600	640800	476800	564300	No Proteins	Not Used	11507	0.001	0.00727	1357	1358	3	0	5792000	2	686.9	1372.79	0	-5.16	1	4442	4443	MS2	0/0	0	0	2ms21_2014_479_PFL_Fr1.mgf			1026000	438500	763600	640800	476800
High	A	eQAVEGGEVELScLVPR	7029	Unambiguous		0	0		N-Term(TMT6plex); C13(Carbamidomethyl)	CID	1	0	1	268400	201200	221000	404500	191900	239300	No Proteins	Not Used	11509	0	2.05e-05	1664	1732	5.24	0	3203000	2	1051.04	2101.08	0	-1.7	1	4446	4447	MS2	0/0	0	0	2ms21_2014_479_PFL_Fr1.mgf			268400	201200	221000	404500	191900
High	A	dGDNNLAQQLAVLcGR	7019	Unambiguous	Intrinsic factor-vitamin B12 receptor (Fragment) OS=Homo sapiens GN=CUBN PE=4 SV=1 - [Q7LC53_HUMAN]	2	1	Q7LC53	N-Term(TMT6plex); C14(Carbamidomethyl)	CID	1	0	1	40330	28800	30380	48400	21840	37690	Unique	Used	11511	0.005	0.139	1286	1221	2.43	0	395000	3	658.339	1973	0	-2	1	4451	4452	MS2	0/0	0	0	2ms21_2014_479_PFL_Fr1.mgf			40330	28800	30380	48400	21840
High	A	aAPSVTLFPPSSEELQANk	6035	Unambiguous	Uncharacterized protein OS=Homo sapiens PE=2 SV=1 - [Q6GMV8_HUMAN]	32	1	Q6GMV8	N-Term(TMT6plex); K19(TMT6plex)	CID	1	0	1	171700	233400	250600	180900	165500	312100	Unique	Used	11515	0.001	0.00955	2993	3116	3.65	0	3447000	3	815.453	2444.35	0	0.79	1	4460	4461	MS2	0/0	0	0	2ms21_2014_479_PFL_Fr1.mgf			171700	233400	250600	180900	165500
Middle	A	dIQMTQSPSTLSVSVGDR	7079	Unambiguous		0	0		N-Term(TMT6plex)	CID	1	0	1	1387000	743600	1092000	1063000	1113000	966400	No Proteins	Not Used	11523	0.012	0.212	2210	2143	2.86	0	12620000	2	1075.57	2150.13	0.02	15.94	1	4477	4478	MS2	0/0	0	0	2ms21_2014_479_PFL_Fr1.mgf			1387000	743600	1092000	1063000	1113000
High	A	iQYQLVDISQDNALR	7129	Unambiguous	SH3 domain-binding glutamic acid-rich-like protein 3 OS=Homo sapiens GN=SH3BGRL3 PE=1 SV=1 - [Q5T123_HUMAN]	5	1	Q5T123	N-Term(TMT6plex)	CID	1	0	1	1327000	1001000	791300	1786000	689700	1051000	Unique	Used	11530	0	0.000105	2579	2699	5.39	0	11210000	2	1003.05	2005.1	0	2.3	1	4493	4494	MS2	0/0	0	0	2ms21_2014_479_PFL_Fr1.mgf			1327000	1001000	791300	1786000	689700
High	A	dWVIPPIScPENEk	7133	Unambiguous	Cadherin-1 OS=Homo sapiens GN=CDH1 PE=1 SV=1 - [H3BNC6_HUMAN]	9	1	H3BNC6	N-Term(TMT6plex); C9(Carbamidomethyl); K14(TMT6plex)	CID	1	0	1	1875000	1334000	1102000	1972000	858700	1212000	Unique	Used	11531	0.002	0.0497	2342	2366	3.96	0	15540000	2	1071.57	2142.14	0	4	1	4495	4496	MS2	0/0	0	0	2ms21_2014_479_PFL_Fr1.mgf			1875000	1334000	1102000	1972000	858700
High	A	vLPDVLQVSAAPPGPR	7137	Unambiguous	Immunoglobulin superfamily member 8 (Fragment) OS=Homo sapiens GN=IGSF8 PE=4 SV=1 - [C9J8Z4_HUMAN]	3	1	C9J8Z4	N-Term(TMT6plex)	CID	1	0	1	509600	287100	299500	600200	279400	301600	Unique	Used	11532	0	0.000385	2498	2461	4.67	0	4242000	2	923.045	1845.08	0	1.19	1	4497	4498	MS2	0/0	0	0	2ms21_2014_479_PFL_Fr1.mgf			509600	287100	299500	600200	279400
High	A	dWVIPPIScPENEk	7133	Unambiguous	Cadherin-1 OS=Homo sapiens GN=CDH1 PE=1 SV=1 - [H3BNC6_HUMAN]	9	1	H3BNC6	N-Term(TMT6plex); C9(Carbamidomethyl); K14(TMT6plex)	CID	1	0	1	339200	190200	194600	318300	198600	233200	Unique	Used	11534	0.001	0.0142	2290	2307	3.19	0	8145000	3	714.716	2142.13	0	1.58	1	4501	4502	MS2	0/0	0	0	2ms21_2014_479_PFL_Fr1.mgf			339200	190200	194600	318300	198600
High	A	qNcELFEQLGEYk	7148	Unambiguous	Albumin (Fragment) OS=Homo sapiens PE=2 SV=1 - [F6KPG5_HUMAN]	6	1	F6KPG5	N-Term(TMT6plex); C3(Carbamidomethyl); K13(TMT6plex)	CID	1	0	1	70640	73030	56800	65160	95470	92260	Unique	Used	11535	0.002	0.0455	1587	1621	2.32	0	1729000	3	706.03	2116.07	0	-1.87	1	4504	4505	MS2	0/0	0	0	2ms21_2014_479_PFL_Fr1.mgf			70640	73030	56800	65160	95470
High	A	lVQAFQFTDk	7165	Unambiguous		0	0		N-Term(TMT6plex); K10(TMT6plex)	CID	1	0	1	293900	260600	294500	398900	243300	364600	No Proteins	Not Used	11539	0.001	0.00902	1588	1621	3.96	0	3107000	2	827.979	1654.95	0	-3.81	1	4512	4513	MS2	0/0	0	0	2ms21_2014_479_PFL_Fr1.mgf			293900	260600	294500	398900	243300
High	A	gLEWVANIk	7169	Unambiguous		0	0		N-Term(TMT6plex); K9(TMT6plex)	CID	1	0	1	2116000	2857000	1809000	4506000	2298000	2950000	No Proteins	Not Used	11540	0.001	0.0138	1668	1620	3.09	0	19880000	2	744.453	1487.9	0	0.12	1	4515	4516	MS2	0/0	0	0	2ms21_2014_479_PFL_Fr1.mgf			2116000	2857000	1809000	4506000	2298000
High	A	aAPSVTLFPPSSEELQANk	6035	Unambiguous	Uncharacterized protein OS=Homo sapiens PE=2 SV=1 - [Q6GMV8_HUMAN]	32	1	Q6GMV8	N-Term(TMT6plex); K19(TMT6plex)	CID	1	0	1	334600	308800	389100	228200	191400	337900	Unique	Used	11541	0	8.45e-05	2971	3075	5.1	0	15460000	2	1222.68	2444.35	0	2.59	1	4517	4518	MS2	0/0	0	0	2ms21_2014_479_PFL_Fr1.mgf			334600	308800	389100	228200	191400
High	A	lFWTDTGINPR	7193	Unambiguous	Isoform 2 of Pro-epidermal growth factor OS=Homo sapiens GN=EGF - [EGF_HUMAN]	3	1	P01133-2	N-Term(TMT6plex)	CID	1	0	1	1875000	887100	627500	2177000	1190000	1380000	Unique	Used	11545	0.002	0.0537	1501	1500	3.06	0	11530000	2	774.922	1548.84	0	0.13	1	4526	4527	MS2	0/0	0	0	2ms21_2014_479_PFL_Fr1.mgf			1875000	887100	627500	2177000	1190000
Middle	A	gLEWVANIk	7169	Unambiguous		0	0		N-Term(TMT6plex); K9(TMT6plex)	CID	1	0	1	20780	23830	21440	47170	23860	30910	No Proteins	Not Used	11547	0.016	0.311	1775	1717	1.78	0	242600	3	496.637	1487.9	0	-0.96	1	4530	4531	MS2	0/0	0	0	2ms21_2014_479_PFL_Fr1.mgf			20780	23830	21440	47170	23860
High	A	tYMLAFDVNDEk	5470	Unambiguous	Alpha-1-acid glycoprotein 1 OS=Homo sapiens GN=ORM1 PE=1 SV=1 - [A1AG1_HUMAN]	1	1	P02763	N-Term(TMT6plex); K12(TMT6plex)	CID	1	0	1	363800	1969000	1175000	454100	1293000	1899000	Unique	Used	11550	0	0.00101	1516	1544	4.29	0	9510000	2	952.497	1903.99	0	-0.85	1.02	4537	4538	MS2	0/0	0	0	2ms21_2014_479_PFL_Fr1.mgf			363800	1969000	1175000	454100	1293000
High	A	lLGLSLAGk	7220	Unambiguous	Lymphatic vessel endothelial hyaluronic acid receptor 1 OS=Homo sapiens GN=LYVE1 PE=1 SV=2 - [LYVE1_HUMAN]	1	1	Q9Y5Y7	N-Term(TMT6plex); K9(TMT6plex)	CID	1	0	1	936800	1282000	743200	847200	623900	1340000	Unique	Used	11551	0.001	0.0106	755	792	3.39	0	8905000	2	665.447	1329.89	0	0.43	1.02	4539	4540	MS2	0/0	0	0	2ms21_2014_479_PFL_Fr1.mgf			936800	1282000	743200	847200	623900
High	A	aTLLEEQLPLGk	7227	Unambiguous		0	0		N-Term(TMT6plex); K12(TMT6plex)	CID	1	0	1	709600	619000	405200	666100	388000	570500	No Proteins	Not Used	11552	0.001	0.00736	1184	1238	3.45	0	4875000	2	885.543	1770.08	0	0.64	1.02	4541	4542	MS2	0/0	0	0	2ms21_2014_479_PFL_Fr1.mgf			709600	619000	405200	666100	388000
High	A	tYMLAFDVNDEk	5470	Unambiguous	Alpha-1-acid glycoprotein 1 OS=Homo sapiens GN=ORM1 PE=1 SV=1 - [A1AG1_HUMAN]	1	1	P02763	N-Term(TMT6plex); K12(TMT6plex)	CID	1	0	1				14560			No Quan Values	Not Used	11555	0	0.00251	1548	1578	2.98	0	166800	3	635.335	1903.99	0	1.32	1.02	4548	4549	MS2	0/0	0	0	2ms21_2014_479_PFL_Fr1.mgf						14560
High	A	iYWVDLER	7247	Unambiguous	Isoform 2 of Pro-epidermal growth factor OS=Homo sapiens GN=EGF - [EGF_HUMAN]	3	1	P01133-2	N-Term(TMT6plex)	CID	1	0	1	402100	329900	191500	383700	301100	354000	Unique	Used	11556	0.005	0.15	1303	1288	2.31	0	2968000	2	661.87	1322.73	0	1.66	1.02	4550	4551	MS2	0/0	0	0	2ms21_2014_479_PFL_Fr1.mgf			402100	329900	191500	383700	301100
High	A	eNSLLFDPLSSSSSNk	7251	Unambiguous	Aminopeptidase N OS=Homo sapiens GN=ANPEP PE=1 SV=4 - [AMPN_HUMAN]	3	1	P15144	N-Term(TMT6plex); K16(TMT6plex)	CID	1	0	1	21390	14690	14780	9575	13880	14000	Unique	Used	11557	0	9.07e-06	2379	2337	5.74	0	1197000	2	1092.08	2183.16	0	-1.77	1.02	4552	4553	MS2	0/0	0	0	2ms21_2014_479_PFL_Fr1.mgf			21390	14690	14780	9575	13880
High	A	sYELPDGQVITIGNER	7255	Unambiguous	cDNA FLJ32030 fis, clone NTONG2000040, highly similar to Actin, alpha cardiac OS=Homo sapiens PE=2 SV=1 - [B3KPP5_HUMAN]	13	1	B3KPP5	N-Term(TMT6plex)	CID	1	0	1	46660	39590	43940	45490	41070	57240	Unique	Used	11558	0	2.26e-05	1873	1805	4.34	0	1054000	2	1010.53	2020.06	0	1.3	1.02	4554	4555	MS2	0/0	0	0	2ms21_2014_479_PFL_Fr1.mgf			46660	39590	43940	45490	41070
High	A	lYGSEAFATDFQDSAAAk	7259	Unambiguous	Alpha-1-antichymotrypsin OS=Homo sapiens GN=SERPINA3 PE=1 SV=2 - [AACT_HUMAN]	2	1	P01011	N-Term(TMT6plex); K18(TMT6plex)	CID	1	0	1	71280	140600	88380	56670	113600	148000	Unique	Used	11559	0	0.000568	1993	1971	4.59	0	2615000	3	784.071	2350.2	0	0.21	1.02	4556	4557	MS2	0/0	0	0	2ms21_2014_479_PFL_Fr1.mgf			71280	140600	88380	56670	113600
High	A	tLAFPLTIR	7261	Unambiguous	Endothelial protein C receptor OS=Homo sapiens GN=PROCR PE=1 SV=1 - [EPCR_HUMAN]	1	1	Q9UNN8	N-Term(TMT6plex)	CID	1	0	1	5810000	3142000	3193000	4856000	6874000	5726000	Unique	Used	11560	0.002	0.0768	2039	2017	2.68	0	43290000	2	630.897	1260.79	0	-0.2	1.02	4559	4560	MS2	0/0	0	0	2ms21_2014_479_PFL_Fr1.mgf			5810000	3142000	3193000	4856000	6874000
High	A	vVAQGVGIPEDSIFTmADR	7265	Unambiguous	Protein AMBP OS=Homo sapiens GN=AMBP PE=1 SV=1 - [AMBP_HUMAN]	1	1	P02760	N-Term(TMT6plex); M16(Oxidation)	CID	1	0	1	472300	224700	284100	459700	402900	279100	Unique	Used	11561	0	1.57e-05	1914	2013	3.7	0	5823000	3	750.726	2250.16	0	-0.58	1.02	4561	4562	MS2	0/0	0	0	2ms21_2014_479_PFL_Fr1.mgf			472300	224700	284100	459700	402900
High	A	lYGSEAFATDFQDSAAAk	7259	Unambiguous	Alpha-1-antichymotrypsin OS=Homo sapiens GN=SERPINA3 PE=1 SV=2 - [AACT_HUMAN]	2	1	P01011	N-Term(TMT6plex); K18(TMT6plex)	CID	1	0	1	422400	1786000	1302000	512000	871800	1595000	Unique	Used	11562	0	0.000105	2079	2108	5.56	0	9899000	2	1175.61	2350.21	0	3.65	1.02	4563	4564	MS2	0/0	0	0	2ms21_2014_479_PFL_Fr1.mgf			422400	1786000	1302000	512000	871800
High	A	tYMLAFDVNDEk	5470	Unambiguous	Alpha-1-acid glycoprotein 1 OS=Homo sapiens GN=ORM1 PE=1 SV=1 - [A1AG1_HUMAN]	1	1	P02763	N-Term(TMT6plex); K12(TMT6plex)	CID	1	0	1	2833000	21720000	12700000	4565000	14250000	22660000	Unique	Used	11565	0	0.00103	1522	1546	4.13	0	102300000	2	952.497	1903.99	0	0.04	1.02	4570	4571	MS2	0/0	0	0	2ms21_2014_479_PFL_Fr1.mgf			2833000	21720000	12700000	4565000	14250000
High	A	gIQVEIYSFPk	7285	Unambiguous	Vascular cell adhesion protein 1 OS=Homo sapiens GN=VCAM1 PE=4 SV=1 - [E9PDD2_HUMAN]	4	1	E9PDD2	N-Term(TMT6plex); K11(TMT6plex)	CID	1	0	1	871500	864900	621200	1244000	363700	943000	Unique	Used	11566	0.002	0.0582	1770	1743	3.19	0	6763000	2	870.01	1739.01	0	-0.76	1.02	4572	4573	MS2	0/0	0	0	2ms21_2014_479_PFL_Fr1.mgf			871500	864900	621200	1244000	363700
High	A	sDNcEDTPEAGYFAVAVVk	7307	Unambiguous	Transferrin variant (Fragment) OS=Homo sapiens PE=2 SV=1 - [Q53H26_HUMAN]	4	1	Q53H26	N-Term(TMT6plex); C4(Carbamidomethyl); K19(TMT6plex)	CID	1	0	1	42210	1243000	494700		1259000	988600	Unique	Used	11572	0	6.93e-05	1514	1552	5.1	0	6779000	2	1265.63	2530.25	0	0.5	1.02	4585	4586	MS2	0/0	0	0	2ms21_2014_479_PFL_Fr1.mgf			42210	1243000	494700		1259000
High	A	eVPLNTIIFmGR	7320	Unambiguous	Antithrombin-III OS=Homo sapiens GN=SERPINC1 PE=1 SV=1 - [ANT3_HUMAN]	1	1	P01008	N-Term(TMT6plex); M10(Oxidation)	CID	1	0	1	317600	852900	482900	268900	361000	580400	Unique	Used	11575	0.001	0.028	2139	2058	1.92	0	5225000	2	817.961	1634.92	0	1.08	1.02	4592	4593	MS2	0/0	0	0	2ms21_2014_479_PFL_Fr1.mgf			317600	852900	482900	268900	361000
Middle	A	cKPVNTFVHEPLVDVQNVcFQEk	7343	Unambiguous		0	0		N-Term(TMT6plex); C1(Carbamidomethyl); C19(Carbamidomethyl); K23(TMT6plex)	CID	1	0	1	7194	5049		6246		10460	No Proteins	Not Used	11580	0.015	0.293	3236	3222	3.2	0	402900	3	1082.56	3245.66	-0.01	-6.84	1.02	4603	4604	MS2	0/0	0	0	2ms21_2014_479_PFL_Fr1.mgf			7194	5049		6246
High	A	gYEIIWTSSPSGcGGTLYGDR	7361	Unambiguous	Intrinsic factor-vitamin B12 receptor (Fragment) OS=Homo sapiens GN=CUBN PE=4 SV=1 - [Q7LC53_HUMAN]	2	1	Q7LC53	N-Term(TMT6plex); C13(Carbamidomethyl)	CID	1	0	1	36200	35340	68690	53210	37620	40800	Unique	Used	11584	0	0.000531	968	991	4.63	0	1022000	2	1253.11	2505.21	0.01	5.6	1.02	4611	4612	MS2	0/0	0	0	2ms21_2014_479_PFL_Fr1.mgf			36200	35340	68690	53210	37620
High	A	sDNcEDTPEAGYFAVAVVk	7307	Unambiguous	Transferrin variant (Fragment) OS=Homo sapiens PE=2 SV=1 - [Q53H26_HUMAN]	4	1	Q53H26	N-Term(TMT6plex); C4(Carbamidomethyl); K19(TMT6plex)	CID	1	0	1	52050	204200	74210	71440	193600	184200	Unique	Used	11585	0.002	0.048	1527	1571	2.63	0	2267000	3	844.09	2530.26	0	0.81	1.02	4614	4615	MS2	0/0	0	0	2ms21_2014_479_PFL_Fr1.mgf			52050	204200	74210	71440	193600
High	A	wYDYYTGVDINAR	7403	Unambiguous	Maltase-glucoamylase, intestinal OS=Homo sapiens GN=MGAM PE=3 SV=2 - [E7ER45_HUMAN]	3	1	E7ER45	N-Term(TMT6plex)	CID	1	0	1	214600	201300	304900	185400	217100	240600	Unique	Used	11594	0.001	0.0126	715	662	2.85	0	2387000	2	932.958	1864.91	0	1.45	1.02	4633	4634	MS2	0/0	0	0	2ms21_2014_479_PFL_Fr1.mgf			214600	201300	304900	185400	217100
Middle	A	vTTSQDMLSIMEk	7407	Unambiguous	Isoform 2 of Plasma protease C1 inhibitor OS=Homo sapiens GN=SERPING1 - [IC1_HUMAN]	6	1	P05155-2	N-Term(TMT6plex); K13(TMT6plex)	CID	0.0141	0	1							No Quan Values	Not Used		0.012	0.205	1957	2022	2.13	0	125200	3	647.688	1941.05	0	2.33	1.02	4636	4637	MS2	0/0	0	0	2ms21_2014_479_PFL_Fr1.mgf
High	A	eGScPQVNINFPQLGLcR	7409	Unambiguous	Isoform 2 of WAP four-disulfide core domain protein 2 OS=Homo sapiens GN=WFDC2 - [WFDC2_HUMAN]	3	1	Q14508-2	N-Term(TMT6plex); C4(Carbamidomethyl); C17(Carbamidomethyl)	CID	1	0	1	22860	26250	35010	41240	33780	16110	Unique	Used	11596	0	0.000268	1616	1565	5.62	0	667100	2	1159.59	2318.17	0.01	5.84	1.02	4638	4639	MS2	0/0	0	0	2ms21_2014_479_PFL_Fr1.mgf			22860	26250	35010	41240	33780
High	A	vTTSQDMLSIMEk	7407	Unambiguous	Isoform 2 of Plasma protease C1 inhibitor OS=Homo sapiens GN=SERPING1 - [IC1_HUMAN]	6	1	P05155-2	N-Term(TMT6plex); K13(TMT6plex)	CID	1	0	1	2020000	1152000	947600	2589000	2066000	1449000	Unique	Used	11601	0	7.11e-05	1902	1952	4.9	0	14070000	2	971.026	1941.04	0	0.61	1.03	4649	4650	MS2	0/0	0	0	2ms21_2014_479_PFL_Fr1.mgf			2020000	1152000	947600	2589000	2066000
High	A	eGScPQVNINFPQLGLcR	7409	Unambiguous	Isoform 2 of WAP four-disulfide core domain protein 2 OS=Homo sapiens GN=WFDC2 - [WFDC2_HUMAN]	3	1	Q14508-2	N-Term(TMT6plex); C4(Carbamidomethyl); C17(Carbamidomethyl)	CID	1	0	1	131200	94540	64790	179600	58270	111600	Unique	Used	11603	0	0.000295	1475	1444	4.49	0	2113000	3	773.392	2318.16	0	1.12	1.03	4653	4654	MS2	0/0	0	0	2ms21_2014_479_PFL_Fr1.mgf			131200	94540	64790	179600	58270
High	A	eGScPQVNINFPQLGLcR	7409	Unambiguous	Isoform 2 of WAP four-disulfide core domain protein 2 OS=Homo sapiens GN=WFDC2 - [WFDC2_HUMAN]	3	1	Q14508-2	N-Term(TMT6plex); C4(Carbamidomethyl); C17(Carbamidomethyl)	CID	1	0	1	1300000	1328000	1905000	2137000	1421000	1238000	Unique	Used	11605	0	0.000347	1499	1470	5.56	0	18720000	2	1159.58	2318.16	0	1.73	1.03	4658	4659	MS2	0/0	0	0	2ms21_2014_479_PFL_Fr1.mgf			1300000	1328000	1905000	2137000	1421000
High	A	yYGESLPFGDNSFk	7446	Unambiguous		0	0		N-Term(TMT6plex); K14(TMT6plex)	CID	1	0	1	228400	170000	228100	302700	188300	214800	No Proteins	Not Used	11607	0	0.00129	1505	1477	4.78	0	2830000	2	1041.53	2082.06	0	-0.04	1.03	4662	4663	MS2	0/0	0	0	2ms21_2014_479_PFL_Fr1.mgf			228400	170000	228100	302700	188300
High	A	sDNcEDTPEAGYFAVAVVk	7307	Unambiguous	Transferrin variant (Fragment) OS=Homo sapiens PE=2 SV=1 - [Q53H26_HUMAN]	4	1	Q53H26	N-Term(TMT6plex); C4(Carbamidomethyl); K19(TMT6plex)	CID	1	0	1	48560	1194000	367800	26080	1094000	852800	Unique	Used	11610	0	0.000679	1541	1621	5.4	0	6215000	2	1265.63	2530.26	0	3.01	1.03	4669	4670	MS2	0/0	0	0	2ms21_2014_479_PFL_Fr1.mgf			48560	1194000	367800	26080	1094000
Middle	A	lYVETEcEVk	7470	Unambiguous		0	0		N-Term(TMT6plex); C7(Carbamidomethyl); K10(TMT6plex)	CID	1	0	1	1853000	2646000	2644000	3776000	2321000	3337000	No Proteins	Not Used	11611	0.044	0.568	1347	1363	2.5	0	25320000	2	864.46	1727.91	-0.01	-9.44	1.03	4671	4672	MS2	0/0	0	0	2ms21_2014_479_PFL_Fr1.mgf			1853000	2646000	2644000	3776000	2321000
High	A	mLEEEVLNLk	7476	Unambiguous		0	0		N-Term(TMT6plex); M1(Oxidation); K10(TMT6plex)	CID	1	0	1	9840	10580			4889	11100	No Proteins	Not Used	11613	0.003	0.105	2036	2082	2.2	0	164700	3	564.663	1691.97	0	5.36	1.03	4675	4676	MS2	0/0	0	0	2ms21_2014_479_PFL_Fr1.mgf			9840	10580			4889
High	A	sLNNQFASFIDk	7490	Unambiguous	Keratin 1 OS=Homo sapiens GN=KRT1 PE=3 SV=1 - [H6VRF8_HUMAN]	7	1	H6VRF8	N-Term(TMT6plex); K12(TMT6plex)	CID	1	0	1	9480		10280	13070	11640	9149	Unique	Used	11617	0.001	0.00597	1981	2027	2.68	0	274400	3	614.677	1842.02	0	0.92	1.03	4684	4685	MS2	0/0	0	0	2ms21_2014_479_PFL_Fr1.mgf			9480		10280	13070	11640
High	A	dLDMFINASk	7492	Unambiguous	cDNA FLJ58441, highly similar to Attractin OS=Homo sapiens PE=2 SV=1 - [B4DZ36_HUMAN]	4	1	B4DZ36	N-Term(TMT6plex); K10(TMT6plex)	CID	1	0	1	1951000	1152000	1299000	2744000	1449000	1372000	Unique	Used	11618	0.001	0.0036	1435	1537	4.13	0	12440000	2	806.443	1611.88	0	-1.94	1.03	4686	4687	MS2	0/0	0	0	2ms21_2014_479_PFL_Fr1.mgf			1951000	1152000	1299000	2744000	1449000
High	A	eDIFMETLk	7505	Unambiguous	Zinc-alpha-2-glycoprotein OS=Homo sapiens GN=AZGP1 PE=1 SV=2 - [ZA2G_HUMAN]	1	1	P25311	N-Term(TMT6plex); K9(TMT6plex)	CID	1	0	1	1362000	3758000	2357000	3406000	2994000	3115000	Unique	Used	11621	0.001	0.00766	1556	1529	4.25	0	21510000	2	792.441	1583.88	0	-0.33	1.03	4693	4694	MS2	0/0	0	0	2ms21_2014_479_PFL_Fr1.mgf			1362000	3758000	2357000	3406000	2994000
High	A	fFNVLTTNTDGk	7537	Unambiguous	cDNA FLJ76254, highly similar to Homo sapiens gamma-glutamyl hydrolase (GGH), mRNA OS=Homo sapiens PE=2 SV=1 - [A8K335_HUMAN]	2	1	A8K335	N-Term(TMT6plex); K12(TMT6plex)	CID	1	0	1	856600	960800	1066000	1020000	1386000	1097000	Unique	Used	11628	0	0.000259	2006	1923	4.29	0	8422000	2	908.006	1815	0	-0.35	1.03	4708	4709	MS2	0/0	0	0	2ms21_2014_479_PFL_Fr1.mgf			856600	960800	1066000	1020000	1386000
High	A	lQAPVWEFk	7540	Unambiguous	cDNA FLJ54235, highly similar to Ceroid-lipofuscinosis neuronal protein 5 OS=Homo sapiens PE=2 SV=1 - [B4E1V6_HUMAN]	3	1	B4E1V6	N-Term(TMT6plex); K9(TMT6plex)	CID	1	0	1	576800	468600	726500	753600	510600	574200	Unique	Used	11629	0.001	0.00961	2070	2097	3.63	0	5182000	2	788.468	1575.93	0	-0.54	1.03	4710	4711	MS2	0/0	0	0	2ms21_2014_479_PFL_Fr1.mgf			576800	468600	726500	753600	510600
High	A	fDEFFSEGcAPGSk	7544	Unambiguous	Transferrin variant (Fragment) OS=Homo sapiens PE=2 SV=1 - [Q53H26_HUMAN]	6	1	Q53H26	N-Term(TMT6plex); C9(Carbamidomethyl); K14(TMT6plex)	CID	1	0	1	978600	25900000	9502000	246700	26150000	23340000	Unique	Used	11630	0	5.94e-05	750	692	4.7	0	117300000	2	1018.5	2035.99	0	1.65	1.03	4713	4714	MS2	0/0	0	0	2ms21_2014_479_PFL_Fr1.mgf			978600	25900000	9502000	246700	26150000
High	A	dIPTNSPELEETLTHTITk	6948	Unambiguous	cDNA FLJ53075, highly similar to Kininogen-1 OS=Homo sapiens PE=2 SV=1 - [B4DPP8_HUMAN]	6	1	B4DPP8	N-Term(TMT6plex); K19(TMT6plex)	CID	1	0	1	441300	336500	388400	528700	434100	468000	Unique	Used	11632	0.002	0.0345	3084	3159	3.12	0	7282000	3	866.47	2597.4	0	-4.65	1.03	4717	4718	MS2	0/0	0	0	2ms21_2014_479_PFL_Fr1.mgf			441300	336500	388400	528700	434100
Middle	A	dIAPTLTLYVGk	7561	Unambiguous	Haptoglobin OS=Homo sapiens GN=HP PE=1 SV=1 - [HPT_HUMAN]	3	1	P00738	N-Term(TMT6plex); K12(TMT6plex)	CID	1	0	1							No Quan Values	Not Used		0.029	0.464	1664	1636	1.64	0	140300	3	583.691	1749.06	0	0.57	1.03	4724	4725	MS2	0/0	0	0	2ms21_2014_479_PFL_Fr1.mgf
High	A	wYFDVTEGk	7581	Unambiguous		0	0		N-Term(TMT6plex); K9(TMT6plex)	CID	1	0	1	1162000	905300	916200	1614000	931000	1092000	No Proteins	Not Used	11641	0.001	0.00839	1417	1453	3.24	0	8644000	2	801.933	1602.86	0	0.54	1.03	4737	4738	MS2	0/0	0	0	2ms21_2014_479_PFL_Fr1.mgf			1162000	905300	916200	1614000	931000
High	A	tNLESILSYPk	7585	Unambiguous	Isoform 2 of Plasma protease C1 inhibitor OS=Homo sapiens GN=SERPING1 - [IC1_HUMAN]	6	1	P05155-2	N-Term(TMT6plex); K11(TMT6plex)	CID	1	0	1	80710	79620	104100	116200	93920	75980	Unique	Used	11642	0	0.0019	1951	1947	3.18	0	1610000	2	862.004	1723	0	-1.52	1.03	4739	4740	MS2	0/0	0	0	2ms21_2014_479_PFL_Fr1.mgf			80710	79620	104100	116200	93920
High	A	dSTYSLSSTLTLSk	4222	Unambiguous	Epididymis luminal protein 213 OS=Homo sapiens GN=HEL-213 PE=2 SV=1 - [V9HW34_HUMAN]|Protein IGKV3-11 OS=Homo sapiens GN=IGKV3-11 PE=4 SV=1 - [A0A087WZW8_HUMAN]	16	2	V9HW34;A0A087WZW8	N-Term(TMT6plex); K14(TMT6plex)	CID	1	0	1	4874000	2779000	4100000	2713000	3004000	4614000	Not Unique	Not Used	11649	0	0.000419	2397	2369	4.86	0	32020000	2	981.047	1961.09	0	1.33	1.05	4755	4756	MS2	0/0	0	0	2ms21_2014_479_PFL_Fr1.mgf			4874000	2779000	4100000	2713000	3004000
High	A	aVGLLTVISk	7646	Unambiguous	Prostate stem cell antigen, isoform CRA_a OS=Homo sapiens GN=PSCA PE=4 SV=1 - [D3DWI6_HUMAN]	2	1	D3DWI6	N-Term(TMT6plex); K10(TMT6plex)	CID	1	0	1	16280000		14780000	12870000	2453000	3883000	Unique	Used	11658	0	0.00131	531	514	4.68	0	64570000	2	729.988	1458.97	0	1.31	1.05	4775	4776	MS2	0/0	0	0	2ms21_2014_479_PFL_Fr1.mgf			16280000		14780000	12870000	2453000
High	A	sLPEVPETIELEVR	7650	Unambiguous	Heparan sulfate proteoglycan 2 (Perlecan), isoform CRA_b OS=Homo sapiens GN=HSPG2 PE=4 SV=1 - [A0A024RAB6_HUMAN]	3	1	A0A024RAB6	N-Term(TMT6plex)	CID	1	0	1	1742000	718100	837400	1709000	613600	781000	Unique	Used	11659	0	0.000665	2052	2012	4.14	0	11770000	2	920.519	1840.03	0	2.03	1.05	4777	4778	MS2	0/0	0	0	2ms21_2014_479_PFL_Fr1.mgf			1742000	718100	837400	1709000	613600
High	A	iNFAcSYPLDMk	6029	Unambiguous	cDNA FLJ38724 fis, clone KIDNE2010151, highly similar to UROMODULIN OS=Homo sapiens PE=2 SV=1 - [B3KTU0_HUMAN]	8	1	B3KTU0	N-Term(TMT6plex); C5(Carbamidomethyl); K12(TMT6plex)	CID	1	0	1	3238000	2713000	422600	3738000	5385000	1989000	Unique	Used	11663	0	0.000422	1624	1605	4.65	0	23600000	2	959.005	1917	0	0.51	1.05	4786	4787	MS2	0/0	0	0	2ms21_2014_479_PFL_Fr1.mgf			3238000	2713000	422600	3738000	5385000
High	A	yLSYTLNPDLIR	7671	Unambiguous	Aminopeptidase N OS=Homo sapiens GN=ANPEP PE=1 SV=4 - [AMPN_HUMAN]	3	1	P15144	N-Term(TMT6plex)	CID	1	0	1	688600	513900	731400	519100	843900	760100	Unique	Used	11664	0	0.00198	1784	1785	4.62	0	6305000	2	848.977	1696.95	0	-0.64	1.05	4788	4789	MS2	0/0	0	0	2ms21_2014_479_PFL_Fr1.mgf			688600	513900	731400	519100	843900
High	A	nINDAWVcTNDMFR	7675	Unambiguous	Nuclear transport factor 2 OS=Homo sapiens GN=NUTF2 PE=1 SV=1 - [NTF2_HUMAN]	1	1	P61970	N-Term(TMT6plex); C8(Carbamidomethyl)	CID	1	0	1	1046000	527800	328000	533500	653400	658300	Unique	Used	11665	0	0.00146	407	364	3.69	0	6343000	2	992.968	1984.93	0	3.84	1.05	4790	4791	MS2	0/0	0	0	2ms21_2014_479_PFL_Fr1.mgf			1046000	527800	328000	533500	653400
High	A	vELVPAGkPFYcLSSEDLR	7679	Unambiguous		0	0		N-Term(TMT6plex); K8(TMT6plex); C12(Carbamidomethyl)	CID	1	0	1	899700	990000	813900	1356000	812100	1226000	No Proteins	Not Used	11666	0	0.000358	3437	3414	3.17	0	12270000	3	880.15	2638.43	0	1.22	1.05	4792	4793	MS2	0/0	0	0	2ms21_2014_479_PFL_Fr1.mgf			899700	990000	813900	1356000	812100
High	A	iNFAcSYPLDMk	6029	Unambiguous	cDNA FLJ38724 fis, clone KIDNE2010151, highly similar to UROMODULIN OS=Homo sapiens PE=2 SV=1 - [B3KTU0_HUMAN]	8	1	B3KTU0	N-Term(TMT6plex); C5(Carbamidomethyl); K12(TMT6plex)	CID	1	0	1	1361000	1558000	157400	1747000	2545000	998700	Unique	Used	11669	0	0.00159	1637	1607	2.58	0	29160000	3	639.673	1917	0	1.2	1.05	4799	4800	MS2	0/0	0	0	2ms21_2014_479_PFL_Fr1.mgf			1361000	1558000	157400	1747000	2545000
High	A	sILSWELk	7691	Unambiguous		0	0		N-Term(TMT6plex); K8(TMT6plex)	CID	1	0	1	661600	594600	429400	583400	455200	617300	No Proteins	Not Used	11670	0.001	0.0309	1604	1554	3.36	0	3947000	2	717.442	1433.88	0	-0.67	1.05	4801	4802	MS2	0/0	0	0	2ms21_2014_479_PFL_Fr1.mgf			661600	594600	429400	583400	455200
High	A	eLGIcPDDAAVIPIk	7695	Unambiguous	Prolactin-inducible protein OS=Homo sapiens GN=PIP PE=1 SV=1 - [PIP_HUMAN]	1	1	P12273	N-Term(TMT6plex); C5(Carbamidomethyl); K15(TMT6plex)	CID	1	0	1	159700	212200	222600	263700	168800	133300	Unique	Used	11671	0	0.000141	2269	2157	4.13	0	2269000	2	1035.1	2069.19	0.01	6.56	1.05	4803	4804	MS2	0/0	0	0	2ms21_2014_479_PFL_Fr1.mgf			159700	212200	222600	263700	168800
High	A	lEIDLLk	7722	Unambiguous	Vascular cell adhesion protein 1 OS=Homo sapiens GN=VCAM1 PE=4 SV=1 - [E9PDD2_HUMAN]	4	1	E9PDD2	N-Term(TMT6plex); K7(TMT6plex)	CID	1	0	1	124100	102800	63450	125800	47600	101200	Unique	Used	11676	0.003	0.115	1417	1402	2.87	0	1861000	2	651.426	1301.85	0	0.77	1.05	4814	4815	MS2	0/0	0	0	2ms21_2014_479_PFL_Fr1.mgf			124100	102800	63450	125800	47600
High	A	sLPLLLSQAGVR	7728	Unambiguous		0	0		N-Term(TMT6plex)	CID	1	0	1	327500	230200	409400	196900	266200	332200	No Proteins	Not Used	11677	0.001	0.0131	922	956	3.35	0	2656000	2	741.965	1482.92	0	2.05	1.05	4816	4817	MS2	0/0	0	0	2ms21_2014_479_PFL_Fr1.mgf			327500	230200	409400	196900	266200
High	A	fVTLVFR	7759	Unambiguous	Prostatic acid phosphatase OS=Homo sapiens GN=ACPP PE=1 SV=3 - [PPAP_HUMAN]	3	1	P15309	N-Term(TMT6plex)	CID	1	0	1	1215000	291600	309100	617100	884000	337900	Unique	Used	11683	0.003	0.0988	389	407	0.48	0	4545000	2	555.847	1110.69	0	-0.35	1.05	4830	4831	MS2	0/0	0	0	2ms21_2014_479_PFL_Fr1.mgf			1215000	291600	309100	617100	884000
High	A	cPLLVDSEGWVk	7766	Unambiguous	Polymeric immunoglobulin receptor OS=Homo sapiens GN=PIGR PE=1 SV=4 - [PIGR_HUMAN]	1	1	P01833	N-Term(TMT6plex); C1(Carbamidomethyl); K12(TMT6plex)	CID	1	0	1	526800	607200	616400	591300	492200	572800	Unique	Used	11685	0.001	0.00605	2463	2353	4.35	0	5113000	2	931.021	1861.03	0	2.83	1.05	4834	4835	MS2	0/0	0	0	2ms21_2014_479_PFL_Fr1.mgf			526800	607200	616400	591300	492200
High	A	gTNYLADVFEk	7821	Unambiguous		0	0		N-Term(TMT6plex); K11(TMT6plex)	CID	1	0	1	172300	562200	291900	210600	723700	220000	No Proteins	Not Used	11698	0.001	0.00613	1707	1711	3	0	2824000	2	857.975	1714.94	0	1.09	1.07	4863	4864	MS2	0/0	0	0	2ms21_2014_479_PFL_Fr1.mgf			172300	562200	291900	210600	723700
High	A	lLIYDASDLETGVPSR	7840	Unambiguous		0	0		N-Term(TMT6plex)	CID	1	0	1	55620	54540	51940	43440	33550	41030	No Proteins	Not Used	11703	0.001	0.0102	2521	2486	5.38	0	2243000	2	989.552	1978.1	0.01	14.13	1.07	4874	4875	MS2	0/0	0	0	2ms21_2014_479_PFL_Fr1.mgf			55620	54540	51940	43440	33550
Middle	A	tIIFTPPSGGDPEIIk	7849	Unambiguous		0	0		N-Term(TMT6plex); K16(TMT6plex)	CID	1	0	1	15490	13550	13680	28990			No Proteins	Not Used	11706	0.026	0.418	1885	1894	2.45	0	294600	3	715.094	2143.27	0.01	12.75	1.07	4881	4882	MS2	0/0	0	0	2ms21_2014_479_PFL_Fr1.mgf			15490	13550	13680	28990
Middle	A	iPEGAPFTEDDEk	7866	Unambiguous		0	0		N-Term(TMT6plex); K13(TMT6plex)	CID	1	0	1	112400	254100	229300	118800	220000	352000	No Proteins	Not Used	11711	0.023	0.409	1441	1343	1.96	0	4631000	2	953.494	1905.98	0	-2.18	1.07	4892	4893	MS2	0/0	0	0	2ms21_2014_479_PFL_Fr1.mgf			112400	254100	229300	118800	220000
High	A	lLDNLNQDAPDTYHYVVSEPLGR	7868	Unambiguous		0	0		N-Term(TMT6plex)	CID	1	0	1	112400	254100	229300	118800	220000	352000	No Proteins	Not Used	11711	0	8.16e-05	2787	3087	4.94	0	4631000	3	953.494	2858.47	0	5.19	1.07	4892	4893	MS2	0/0	0	0	2ms21_2014_479_PFL_Fr1.mgf			112400	254100	229300	118800	220000
High	A	yAASSYLSLTPEQWR	7870	Unambiguous		0	0		N-Term(TMT6plex)	CID	1	0	1	20120	23810	49920	17930	23650	32190	No Proteins	Not Used	11712	0	0.000306	1595	1611	5.02	0	1691000	2	1001.02	2001.03	0	2.53	1.07	4894	4895	MS2	0/0	0	0	2ms21_2014_479_PFL_Fr1.mgf			20120	23810	49920	17930	23650
High	A	fDEFFSEGcAPGSk	7544	Unambiguous	Transferrin variant (Fragment) OS=Homo sapiens PE=2 SV=1 - [Q53H26_HUMAN]	6	1	Q53H26	N-Term(TMT6plex); C9(Carbamidomethyl); K14(TMT6plex)	CID	1	0	1	117600	888100	364000	80140	920800	847200	Unique	Used	11716	0	0.000319	793	745	5.7	0	5432000	2	1018.5	2035.99	0	3.57	1.07	4903	4904	MS2	0/0	0	0	2ms21_2014_479_PFL_Fr1.mgf			117600	888100	364000	80140	920800
High	A	tFVPGcQPGEFTLGNIk	7899	Unambiguous	Neutrophil gelatinase-associated lipocalin OS=Homo sapiens GN=LCN2 PE=1 SV=2 - [NGAL_HUMAN]	4	1	P80188	N-Term(TMT6plex); C6(Carbamidomethyl); K17(TMT6plex)	CID	1	0	1	45800	66090	71650	53550	60220	60560	Unique	Used	11719	0	0.000428	2773	2815	3.58	0	2279000	3	775.088	2323.25	0	-1.38	1.07	4909	4910	MS2	0/0	0	0	2ms21_2014_479_PFL_Fr1.mgf			45800	66090	71650	53550	60220
High	A	vTSLTAcLVDQSLR	7901	Unambiguous		0	0		N-Term(TMT6plex); C7(Carbamidomethyl)	CID	1	0	1	855900	767100	778700	1129000	820400	1192000	No Proteins	Not Used	11720	0	0.00185	2414	2392	3.92	0	8875000	2	896.5	1791.99	0	4.99	1.07	4911	4912	MS2	0/0	0	0	2ms21_2014_479_PFL_Fr1.mgf			855900	767100	778700	1129000	820400
High	A	vTSLTAcLVDQSLR	7901	Unambiguous		0	0		N-Term(TMT6plex); C7(Carbamidomethyl)	CID	1	0	1	14710	12960	13390	22580	16380	27230	No Proteins	Not Used	11723	0.002	0.0345	2380	2363	2.96	0	196700	3	598.003	1791.99	0	6	1.07	4918	4919	MS2	0/0	0	0	2ms21_2014_479_PFL_Fr1.mgf			14710	12960	13390	22580	16380
High	A	tLMFGSYLDDEk	6725	Unambiguous	Alpha-1-acid glycoprotein 2 OS=Homo sapiens GN=ORM2 PE=1 SV=2 - [A1AG2_HUMAN]	1	1	P19652	N-Term(TMT6plex); K12(TMT6plex)	CID	1	0	1	1028000	5109000	2709000	1156000	3934000	4315000	Unique	Used	11726	0	0.000378	1712	1614	4.8	0	24720000	2	938.992	1876.98	0	-0.26	1.07	4925	4926	MS2	0/0	0	0	2ms21_2014_479_PFL_Fr1.mgf			1028000	5109000	2709000	1156000	3934000
High	A	tLMFGSYLDDEk	6725	Unambiguous	Alpha-1-acid glycoprotein 2 OS=Homo sapiens GN=ORM2 PE=1 SV=2 - [A1AG2_HUMAN]	1	1	P19652	N-Term(TMT6plex); K12(TMT6plex)	CID	1	0	1	57100	177500	109800	50640	112800	163600	Unique	Used	11729	0.001	0.0125	1727	1627	1.78	0	1607000	3	626.33	1876.98	0	-0.46	1.07	4931	4932	MS2	0/0	0	0	2ms21_2014_479_PFL_Fr1.mgf			57100	177500	109800	50640	112800
High	A	yFIDFVAR	7945	Unambiguous	cDNA FLJ53075, highly similar to Kininogen-1 OS=Homo sapiens PE=2 SV=1 - [B4DPP8_HUMAN]	6	1	B4DPP8	N-Term(TMT6plex)	CID	1	0	1	6539000	2706000	2755000	6081000	3950000	3660000	Unique	Used	11731	0.002	0.0954	1127	1079	3.16	0	40460000	2	630.353	1259.7	0	0.71	1.07	4936	4937	MS2	0/0	0	0	2ms21_2014_479_PFL_Fr1.mgf			6539000	2706000	2755000	6081000	3950000
High	A	tLMFGSYLDDEk	6725	Unambiguous	Alpha-1-acid glycoprotein 2 OS=Homo sapiens GN=ORM2 PE=1 SV=2 - [A1AG2_HUMAN]	1	1	P19652	N-Term(TMT6plex); K12(TMT6plex)	CID	1	0	1	2379000	12160000	6917000	2950000	9486000	10980000	Unique	Used	11734	0	0.000423	1709	1620	3.94	0	57540000	2	938.992	1876.98	0	0.52	1.07	4942	4943	MS2	0/0	0	0	2ms21_2014_479_PFL_Fr1.mgf			2379000	12160000	6917000	2950000	9486000
High	A	sFGMTPVLPAFAGHVPEAVTR	7963	Unambiguous	Alpha-N-acetylglucosaminidase OS=Homo sapiens GN=ufHSD2 PE=4 SV=1 - [Q14769_HUMAN]	2	1	Q14769	N-Term(TMT6plex)	CID	1	0	1	138200	98900	102500	139000	103000	123700	Unique	Used	11735	0	1.72e-05	2939	3104	5.98	0	1996000	3	805.103	2413.29	0	1.92	1.07	4944	4945	MS2	0/0	0	0	2ms21_2014_479_PFL_Fr1.mgf			138200	98900	102500	139000	103000
High	A	dIFTGLIGPmk	7970	Unambiguous	cDNA FLJ76826, highly similar to Homo sapiens ceruloplasmin (ferroxidase) (CP), mRNA OS=Homo sapiens PE=2 SV=1 - [A8K5A4_HUMAN]	5	1	A8K5A4	N-Term(TMT6plex); M10(Oxidation); K11(TMT6plex)	CID	1	0	1	443000	1160000	642900	337900	804300	1209000	Unique	Used	11737	0	0.00266	1844	1832	3.15	0	6748000	2	833.484	1665.96	0	-2.59	1.07	4949	4950	MS2	0/0	0	0	2ms21_2014_479_PFL_Fr1.mgf			443000	1160000	642900	337900	804300
High	A	aQGFTEDTIVFLPQTDk	5298	Unambiguous	Prostaglandin-H2 D-isomerase OS=Homo sapiens GN=PTGDS PE=1 SV=1 - [PTGDS_HUMAN]	2	1	P41222	N-Term(TMT6plex); K17(TMT6plex)	CID	1	0	1	27320	22270	16470	31340	18720	27360	Unique	Used	11739	0	0.000353	2867	2925	4.83	0	340300	2	1184.65	2368.29	0.01	6.06	1.07	4953	4954	MS2	0/0	0	0	2ms21_2014_479_PFL_Fr1.mgf			27320	22270	16470	31340	18720
High	A	mYLGYEYVTAIR	5987	Unambiguous	Transferrin variant (Fragment) OS=Homo sapiens PE=2 SV=1 - [Q53H26_HUMAN]	6	1	Q53H26	N-Term(TMT6plex)	CID	1	0	1	241000	4149000	1896000	315900	3505000	3992000	Unique	Used	11741	0.001	0.00797	1379	1445	3.74	0	23680000	2	854.453	1707.9	0	-0.02	1.07	4958	4959	MS2	0/0	0	0	2ms21_2014_479_PFL_Fr1.mgf			241000	4149000	1896000	315900	3505000
High	A	yFIDFVAR	7945	Unambiguous	cDNA FLJ53075, highly similar to Kininogen-1 OS=Homo sapiens PE=2 SV=1 - [B4DPP8_HUMAN]	6	1	B4DPP8	N-Term(TMT6plex)	CID	1	0	1	1390000	711600	780800	1759000	1232000	1020000	Unique	Used	11743	0.004	0.123	1127	1079	2.75	0	21600000	2	630.353	1259.7	0	0.52	1.07	4962	4963	MS2	0/0	0	0	2ms21_2014_479_PFL_Fr1.mgf			1390000	711600	780800	1759000	1232000
High	A	lWAFDAVk	8011	Unambiguous		0	0		N-Term(TMT6plex); K8(TMT6plex)	CID	1	0	1	258300	89540	454300	101000	188200	300500	No Proteins	Not Used	11746	0.002	0.0405	1583	1524	3.09	0	2767000	2	704.424	1407.84	0	-0.23	1.08	4969	4970	MS2	0/0	0	0	2ms21_2014_479_PFL_Fr1.mgf			258300	89540	454300	101000	188200
High	A	aIGAVPLIQGEYmIPcEk	8054	Unambiguous	Cathepsin D OS=Homo sapiens GN=CTSD PE=1 SV=1 - [CATD_HUMAN]	1	1	P07339	N-Term(TMT6plex); M13(Oxidation); C16(Carbamidomethyl); K18(TMT6plex)	CID	1	0	1	76840	78160	274600	93700	69120	71360	Unique	Used	11756	0	0.000106	3047	3033	4.4	0	2431000	2	1232.18	2463.35	0	2.34	1.08	4991	4992	MS2	0/0	0	0	2ms21_2014_479_PFL_Fr1.mgf			76840	78160	274600	93700	69120
High	A	sLDFTELDVAAEk	8097	Unambiguous	cDNA FLJ53950, highly similar to Angiotensinogen OS=Homo sapiens PE=2 SV=1 - [B4E1B3_HUMAN]	7	1	B4E1B3	N-Term(TMT6plex); K13(TMT6plex)	CID	1	0	1	1478000	1795000	1130000	1358000	1751000	1729000	Unique	Used	11767	0	0.00029	2035	1954	4.73	0	12780000	2	948.525	1896.04	0	2.68	1.08	5015	5016	MS2	0/0	0	0	2ms21_2014_479_PFL_Fr1.mgf			1478000	1795000	1130000	1358000	1751000
High	A	iPLNDLFR	8130	Unambiguous	cDNA FLJ58780, highly similar to Homo sapiens lysosomal-associated membrane protein 2 (LAMP2), transcript variant LAMP2B, mRNA OS=Homo sapiens PE=2 SV=1 - [B4E2S7_HUMAN]	4	1	B4E2S7	N-Term(TMT6plex)	CID	1	0	1	3319000	3025000	5441000	4106000	3206000	3986000	Unique	Used	11773	0.002	0.0703	1299	1317	1.64	0	34080000	2	608.867	1216.73	0	0.58	1.08	5028	5029	MS2	0/0	0	0	2ms21_2014_479_PFL_Fr1.mgf			3319000	3025000	5441000	4106000	3206000
High	A	lALLVDTVGPR	8142	Unambiguous	Carboxypeptidase Q OS=Homo sapiens GN=CPQ PE=1 SV=1 - [CBPQ_HUMAN]	2	1	Q9Y646	N-Term(TMT6plex)	CID	1	0	1	943100	840000	894000	966600	784400	989000	Unique	Used	11776	0.001	0.00991	836	850	3.36	0	8450000	2	691.933	1382.86	0	1.36	1.08	5035	5036	MS2	0/0	0	0	2ms21_2014_479_PFL_Fr1.mgf			943100	840000	894000	966600	784400
High	A	lSNNALSGLPQGVFGk	8151	Unambiguous	Carboxypeptidase N subunit 2 OS=Homo sapiens GN=CPN2 PE=1 SV=3 - [CPN2_HUMAN]	1	1	P22792	N-Term(TMT6plex); K16(TMT6plex)	CID	1	0	1	23710		15120	19300	20520	19410	Unique	Used	11778	0.005	0.137	3131	3101	2.65	0	284100	3	687.402	2060.19	0	0.86	1.08	5039	5040	MS2	0/0	0	0	2ms21_2014_479_PFL_Fr1.mgf			23710		15120	19300	20520
High	A	iPLNDLFR	8130	Unambiguous	cDNA FLJ58780, highly similar to Homo sapiens lysosomal-associated membrane protein 2 (LAMP2), transcript variant LAMP2B, mRNA OS=Homo sapiens PE=2 SV=1 - [B4E2S7_HUMAN]	4	1	B4E2S7	N-Term(TMT6plex)	CID	1	0	1	4487000	4194000	7076000	5991000	3892000	4858000	Unique	Used	11781	0.002	0.092	1314	1339	2.45	0	52420000	2	608.867	1216.73	0	1.38	1.08	5046	5047	MS2	0/0	0	0	2ms21_2014_479_PFL_Fr1.mgf			4487000	4194000	7076000	5991000	3892000
High	A	eNFLFLTPDck	8170	Unambiguous	cDNA FLJ53075, highly similar to Kininogen-1 OS=Homo sapiens PE=2 SV=1 - [B4DPP8_HUMAN]	5	1	B4DPP8	N-Term(TMT6plex); C10(Carbamidomethyl); K11(TMT6plex)	CID	1	0	1							No Quan Values	Not Used		0.001	0.00877	1749	1820	2.87	0	382500	3	614.668	1841.99	0	0.85	1.08	5050	5051	MS2	0/0	0	0	2ms21_2014_479_PFL_Fr1.mgf
High	A	aLLSAPWYLNR	8177	Unambiguous	cDNA FLJ50884, highly similar to Beta-hexosaminidase alpha chain (EC 3.2.1.52) OS=Homo sapiens PE=2 SV=1 - [B4DVL8_HUMAN]	7	1	B4DVL8	N-Term(TMT6plex)	CID	1	0	1	685300	541800	627700	838300	504700	616200	Unique	Used	11785	0.001	0.0191	2159	2189	3.77	0	5953000	2	766.944	1532.88	0	1.35	1.08	5054	5055	MS2	0/0	0	0	2ms21_2014_479_PFL_Fr1.mgf			685300	541800	627700	838300	504700
High	A	eNFLFLTPDck	8170	Unambiguous	cDNA FLJ53075, highly similar to Kininogen-1 OS=Homo sapiens PE=2 SV=1 - [B4DPP8_HUMAN]	5	1	B4DPP8	N-Term(TMT6plex); C10(Carbamidomethyl); K11(TMT6plex)	CID	1	0	1	36900000	18800000	18760000	35180000	23450000	22260000	Unique	Used	11786	0	0.000716	1755	1834	3.7	0	212500000	2	921.497	1841.99	0	0.26	1.08	5057	5058	MS2	0/0	0	0	2ms21_2014_479_PFL_Fr1.mgf			36900000	18800000	18760000	35180000	23450000
High	A	lNDLEDALQQAk	8189	Unambiguous	Keratin 1 OS=Homo sapiens GN=KRT1 PE=3 SV=1 - [H6VRF8_HUMAN]	7	1	H6VRF8	N-Term(TMT6plex); K12(TMT6plex)	CID	1	0	1	305000	417800	199500	180300	400200	298200	Unique	Used	11788	0	0.000739	2461	2336	4.51	0	3395000	2	908.516	1816.02	0	1.18	1.08	5061	5062	MS2	0/0	0	0	2ms21_2014_479_PFL_Fr1.mgf			305000	417800	199500	180300	400200
High	A	lAPGTIVEVWk	8217	Unambiguous	Beta-hexosaminidase subunit beta OS=Homo sapiens GN=HEL-248 PE=1 SV=1 - [Q5URX0_HUMAN]	2	1	Q5URX0	N-Term(TMT6plex); K11(TMT6plex)	CID	1	0	1	748500	676300	898900	734300	617800	766700	Unique	Used	11794	0.001	0.00341	1052	1091	3.19	0	6080000	2	836.017	1671.03	0	1.37	1.08	5074	5075	MS2	0/0	0	0	2ms21_2014_479_PFL_Fr1.mgf			748500	676300	898900	734300	617800
High	A	dFNIPGFPTVR	8221	Unambiguous		0	0		N-Term(TMT6plex)	CID	1	0	1	50930	20630	37380	49860	35790	39470	No Proteins	Not Used	11795	0.001	0.0296	1699	1637	3.42	0	806200	2	746.416	1491.83	0	6.42	1.08	5076	5077	MS2	0/0	0	0	2ms21_2014_479_PFL_Fr1.mgf			50930	20630	37380	49860	35790
High	A	gDTFScMVGHEALPLAFTQk	8237	Unambiguous	Ig alpha-1 chain C region OS=Homo sapiens GN=IGHA1 PE=1 SV=2 - [IGHA1_HUMAN]|Putative uncharacterized protein DKFZp686M08189 OS=Homo sapiens GN=DKFZp686M08189 PE=2 SV=1 - [Q6MZX9_HUMAN]	11	2	P01876;Q6MZX9	N-Term(TMT6plex); C6(Carbamidomethyl); K20(TMT6plex)	CID	1	0	1	114400	234100	272600	99160	254300	230000	Not Unique	Not Used	11798	0	0.000111	2486	2525	2.42	0	3896000	3	889.794	2667.37	0	0.5	1.1	5083	5084	MS2	0/0	0	0	2ms21_2014_479_PFL_Fr1.mgf			114400	234100	272600	99160	254300
High	A	dSTYSLSSTLTLSk	4222	Unambiguous	Epididymis luminal protein 213 OS=Homo sapiens GN=HEL-213 PE=2 SV=1 - [V9HW34_HUMAN]|Protein IGKV3-11 OS=Homo sapiens GN=IGKV3-11 PE=4 SV=1 - [A0A087WZW8_HUMAN]	16	2	V9HW34;A0A087WZW8	N-Term(TMT6plex); K14(TMT6plex)	CID	1	0	1	3908000	2539000	3655000	2296000	2498000	3465000	Not Unique	Not Used	11801	0	0.00119	2422	2393	5.37	0	24770000	2	981.046	1961.09	0	0.46	1.1	5090	5091	MS2	0/0	0	0	2ms21_2014_479_PFL_Fr1.mgf			3908000	2539000	3655000	2296000	2498000
High	A	yAASSYLSLTPEQWk	8208	Unambiguous	Uncharacterized protein OS=Homo sapiens PE=2 SV=1 - [Q6GMV8_HUMAN]|IGL@ protein OS=Homo sapiens GN=IGL@ PE=2 SV=1 - [Q567P1_HUMAN]	31	2	Q6GMV8;Q567P1	N-Term(TMT6plex); K15(TMT6plex)	CID	1	0	1	3350000	3606000	4329000	2597000	3856000	5086000	Not Unique	Not Used	11803	0	8.84e-05	2469	2390	5.62	0	48180000	2	1101.6	2202.19	0	2.39	1.1	5094	5095	MS2	0/0	0	0	2ms21_2014_479_PFL_Fr1.mgf			3350000	3606000	4329000	2597000	3856000
High	A	iTAVSLDVLDk	8283	Unambiguous	Isoform 2 of Pro-epidermal growth factor OS=Homo sapiens GN=EGF - [EGF_HUMAN]	3	1	P01133-2	N-Term(TMT6plex); K11(TMT6plex)	CID	1	0	1	620400	502400	287500	717900	542600	543400	Unique	Used	11809	0.001	0.0293	1448	1387	3.56	0	4338000	2	816.506	1632	0	3.67	1.1	5107	5108	MS2	0/0	0	0	2ms21_2014_479_PFL_Fr1.mgf			620400	502400	287500	717900	542600
High	A	eNFLFLTPDck	8170	Unambiguous	cDNA FLJ53075, highly similar to Kininogen-1 OS=Homo sapiens PE=2 SV=1 - [B4DPP8_HUMAN]	5	1	B4DPP8	N-Term(TMT6plex); C10(Carbamidomethyl); K11(TMT6plex)	CID	1	0	1	13470000	6464000	7299000	13940000	9219000	8365000	Unique	Used	11811	0.001	0.00384	1758	1835	3.9	0	84060000	2	921.498	1841.99	0	0.39	1.1	5112	5113	MS2	0/0	0	0	2ms21_2014_479_PFL_Fr1.mgf			13470000	6464000	7299000	13940000	9219000
High	A	aPDLQDLPWQVk	8300	Unambiguous	Vitamin K-dependent protein Z OS=Homo sapiens GN=PROZ PE=1 SV=2 - [PROZ_HUMAN]	3	1	P22891	N-Term(TMT6plex); K12(TMT6plex)	CID	1	0	1	576900	432900	444100	931300	884700	679200	Unique	Used	11813	0	0.000342	2027	2031	4.18	0	5801000	2	934.539	1868.07	0	1.31	1.1	5116	5117	MS2	0/0	0	0	2ms21_2014_479_PFL_Fr1.mgf			576900	432900	444100	931300	884700
High	A	aQGFTEDTIVFLPQTDk	5298	Unambiguous	Prostaglandin-H2 D-isomerase OS=Homo sapiens GN=PTGDS PE=1 SV=1 - [PTGDS_HUMAN]	2	1	P41222	N-Term(TMT6plex); K17(TMT6plex)	CID	1	0	1	6094000	4888000	3758000	6421000	2662000	5199000	Unique	Used	11817	0	0.000115	2975	3005	4.7	0	44700000	2	1184.65	2368.29	0	3.17	1.1	5125	5126	MS2	0/0	0	0	2ms21_2014_479_PFL_Fr1.mgf			6094000	4888000	3758000	6421000	2662000
High	A	vSFELFADk	8330	Unambiguous		0	0		N-Term(TMT6plex); K9(TMT6plex)	CID	1	0	1	50180	21660	37150	48930	42870	38610	No Proteins	Not Used	11820	0.001	0.0105	1376	1525	3.43	0	1115000	2	757.438	1513.87	0	1.24	1.1	5131	5132	MS2	0/0	0	0	2ms21_2014_479_PFL_Fr1.mgf			50180	21660	37150	48930	42870
High	A	lLLFSDGNSQGATPAAIEk	8339	Unambiguous	Collagen alpha-1(VI) chain OS=Homo sapiens GN=COL6A1 PE=4 SV=1 - [A0A087X0S5_HUMAN]	2	1	A0A087X0S5	N-Term(TMT6plex); K19(TMT6plex)	CID	1	0	1	1038000	403500	349200	510400	674500	453300	Unique	Used	11822	0	4.45e-06	2921	2852	6.35	0	5012000	2	1195.67	2390.33	0	-0.49	1.1	5136	5137	MS2	0/0	0	0	2ms21_2014_479_PFL_Fr1.mgf			1038000	403500	349200	510400	674500
High	A	yPDAVATWLNPDPSQk	8343	Unambiguous	Isoform D of Osteopontin OS=Homo sapiens GN=SPP1 - [OSTP_HUMAN]	6	1	P10451-4	N-Term(TMT6plex); K16(TMT6plex)	CID	1	0	1	76470	85810	74110	64630	51760	62050	Unique	Used	11823	0	0.000766	2270	2289	4.55	0	1668000	2	1130.6	2260.2	0	0.43	1.1	5138	5139	MS2	0/0	0	0	2ms21_2014_479_PFL_Fr1.mgf			76470	85810	74110	64630	51760
Middle	A	tAGWNIPmGLLYNk	8353	Unambiguous	Transferrin variant (Fragment) OS=Homo sapiens PE=2 SV=1 - [Q53H26_HUMAN]	6	1	Q53H26	N-Term(TMT6plex); M8(Oxidation); K14(TMT6plex)	CID	1	0	1	85580	115900	122700	119800	107100	132200	Unique	Used	11826	0.018	0.352	2972	2892	1.92	0	914700	3	684.718	2052.14	0	1.68	1.1	5145	5146	MS2	0/0	0	0	2ms21_2014_479_PFL_Fr1.mgf			85580	115900	122700	119800	107100
High	A	vAEGTQVLELPFk	8368	Unambiguous	Antithrombin-III OS=Homo sapiens GN=SERPINC1 PE=1 SV=1 - [ANT3_HUMAN]	1	1	P01008	N-Term(TMT6plex); K13(TMT6plex)	CID	1	0	1	292400	1572000	571700	506200	670600	816700	Unique	Used	11830	0	9.93e-05	2498	2457	4.26	0	6355000	2	945.062	1889.12	0	0.72	1.1	5153	5154	MS2	0/0	0	0	2ms21_2014_479_PFL_Fr1.mgf			292400	1572000	571700	506200	670600
High	A	tAGWNIPmGLLYNk	8353	Unambiguous	Transferrin variant (Fragment) OS=Homo sapiens PE=2 SV=1 - [Q53H26_HUMAN]	6	1	Q53H26	N-Term(TMT6plex); M8(Oxidation); K14(TMT6plex)	CID	1	0	1	124900	3278000	1029000	71570	3005000	2883000	Unique	Used	11831	0	9.38e-05	3001	2932	3.9	0	17200000	2	1026.57	2052.13	0	-0.72	1.1	5156	5157	MS2	0/0	0	0	2ms21_2014_479_PFL_Fr1.mgf			124900	3278000	1029000	71570	3005000
High	A	eDPQTFYYAVAVVk	8394	Unambiguous	Transferrin variant (Fragment) OS=Homo sapiens PE=2 SV=1 - [Q53H26_HUMAN]	4	1	Q53H26	N-Term(TMT6plex); K14(TMT6plex)	CID	1	0	1	34060	744700	273700	14630	599200	566000	Unique	Used	11836	0	0.000565	2554	2568	2.48	0	12250000	3	696.72	2088.14	0	1.17	1.1	5167	5168	MS2	0/0	0	0	2ms21_2014_479_PFL_Fr1.mgf			34060	744700	273700	14630	599200
High	A	eDPQTFYYAVAVVk	8394	Unambiguous	Transferrin variant (Fragment) OS=Homo sapiens PE=2 SV=1 - [Q53H26_HUMAN]	4	1	Q53H26	N-Term(TMT6plex); K14(TMT6plex)	CID	1	0	1	313800	9316000	3680000	159900	7394000	7531000	Unique	Used	11841	0	9.83e-05	2502	2591	4.43	0	42190000	2	1044.58	2088.14	0	0.62	1.1	5178	5179	MS2	0/0	0	0	2ms21_2014_479_PFL_Fr1.mgf			313800	9316000	3680000	159900	7394000
High	A	dSTYSLSSTLTLSk	4222	Unambiguous	Epididymis luminal protein 213 OS=Homo sapiens GN=HEL-213 PE=2 SV=1 - [V9HW34_HUMAN]|Protein IGKV3-11 OS=Homo sapiens GN=IGKV3-11 PE=4 SV=1 - [A0A087WZW8_HUMAN]	16	2	V9HW34;A0A087WZW8	N-Term(TMT6plex); K14(TMT6plex)	CID	1	0	1	2893000	1909000	2542000	1914000	1963000	2862000	Not Unique	Not Used	11844	0	0.000191	2416	2402	4.56	0	18010000	2	981.046	1961.08	0	-0.22	1.12	5184	5185	MS2	0/0	0	0	2ms21_2014_479_PFL_Fr1.mgf			2893000	1909000	2542000	1914000	1963000
High	A	tLYLADTFPTNFR	8448	Unambiguous	Plasma serine protease inhibitor OS=Homo sapiens GN=SERPINA5 PE=1 SV=3 - [IPSP_HUMAN]	2	1	P05154	N-Term(TMT6plex)	CID	1	0	1	884300	942300	500400	908200	436900	638900	Unique	Used	11850	0	0.000999	1719	1687	4.5	0	7133000	2	894.479	1787.95	0	-1.34	1.12	5198	5199	MS2	0/0	0	0	2ms21_2014_479_PFL_Fr1.mgf			884300	942300	500400	908200	436900
Middle	A	eLDGLWSFR	8455	Unambiguous		0	0		N-Term(TMT6plex)	CID	1	0	1	379900	292100	397200	377100	370900	348700	No Proteins	Not Used	11851	0.013	0.241	1020	1005	0.95	0	2723000	2	676.363	1351.72	0	-1.77	1.12	5200	5201	MS2	0/0	0	0	2ms21_2014_479_PFL_Fr1.mgf			379900	292100	397200	377100	370900
High	A	vFSLQWGEVk	8490	Unambiguous	Complement factor I light chain OS=Homo sapiens GN=CFI PE=3 SV=1 - [G3XAM2_HUMAN]	5	1	G3XAM2	N-Term(TMT6plex); K10(TMT6plex)	CID	1	0	1	117000	138100	116900	73060	170400	154900	Unique	Used	11859	0.001	0.00371	1764	1749	4.69	0	1408000	2	825.985	1650.96	0	0.05	1.12	5217	5218	MS2	0/0	0	0	2ms21_2014_479_PFL_Fr1.mgf			117000	138100	116900	73060	170400
High	A	lLIYDASDLETGVPSR	7840	Unambiguous		0	0		N-Term(TMT6plex)	CID	1	0	1	315700	277300	250100	223400	273900	364600	No Proteins	Not Used	11865	0.001	0.00671	2533	2443	4.29	0	3148000	2	989.554	1978.1	0.02	16.1	1.12	5232	5233	MS2	0/0	0	0	2ms21_2014_479_PFL_Fr1.mgf			315700	277300	250100	223400	273900
High	A	yPDAVATWLNPDPSQk	8343	Unambiguous	Isoform D of Osteopontin OS=Homo sapiens GN=SPP1 - [OSTP_HUMAN]	6	1	P10451-4	N-Term(TMT6plex); K16(TMT6plex)	CID	1	0	1	5023000	5916000	6799000	7782000	5069000	5444000	Unique	Used	11868	0	0.00175	2317	2355	3.4	0	52580000	2	1130.61	2260.21	0	2.48	1.12	5239	5240	MS2	0/0	0	0	2ms21_2014_479_PFL_Fr1.mgf			5023000	5916000	6799000	7782000	5069000
High	A	mYLGYEYVTAIR	5987	Unambiguous	Transferrin variant (Fragment) OS=Homo sapiens PE=2 SV=1 - [Q53H26_HUMAN]	6	1	Q53H26	N-Term(TMT6plex)	CID	1	0	1	90100	1242000	454600	34170	908500	975300	Unique	Used	11869	0	0.00308	1361	1423	4.32	0	6199000	2	854.452	1707.9	0	-0.52	1.12	5241	5242	MS2	0/0	0	0	2ms21_2014_479_PFL_Fr1.mgf			90100	1242000	454600	34170	908500
High	A	lLLTSAPSLATSPAFR	8545	Unambiguous	Alpha-N-acetylglucosaminidase OS=Homo sapiens GN=ufHSD2 PE=4 SV=1 - [Q14769_HUMAN]	2	1	Q14769	N-Term(TMT6plex)	CID	1	0	1	630100	351700	679900	228700	534500	565900	Unique	Used	11870	0	3.78e-05	2767	2689	4.33	0	4885000	2	937.551	1874.1	0	0.37	1.12	5243	5244	MS2	0/0	0	0	2ms21_2014_479_PFL_Fr1.mgf			630100	351700	679900	228700	534500
High	A	eLDLNSVLLk	8549	Unambiguous		0	0		N-Term(TMT6plex); K10(TMT6plex)	CID	1	0	1	288900	162200	185400	234900	148700	225800	No Proteins	Not Used	11871	0.001	0.00871	1641	1676	3.51	0	2018000	2	801.493	1601.98	0	-5.29	1.12	5245	5246	MS2	0/0	0	0	2ms21_2014_479_PFL_Fr1.mgf			288900	162200	185400	234900	148700
High	A	lLLTSAPSLATSPAFR	8545	Unambiguous	Alpha-N-acetylglucosaminidase OS=Homo sapiens GN=ufHSD2 PE=4 SV=1 - [Q14769_HUMAN]	2	1	Q14769	N-Term(TMT6plex)	CID	1	0	1	8540		7289			10800	Unique	Used	11872	0.002	0.0328	2543	2495	3.44	0	130300	3	625.372	1874.1	0	3.88	1.12	5247	5248	MS2	0/0	0	0	2ms21_2014_479_PFL_Fr1.mgf			8540		7289
High	A	aQGFTEDTIVFLPQTDk	5298	Unambiguous	Prostaglandin-H2 D-isomerase OS=Homo sapiens GN=PTGDS PE=1 SV=1 - [PTGDS_HUMAN]	2	1	P41222	N-Term(TMT6plex); K17(TMT6plex)	CID	1	0	1	15500000	11320000	9912000	16270000	6598000	13520000	Unique	Used	11878	0	3.59e-05	2988	3051	5.23	0	114100000	2	1184.65	2368.29	0	2.14	1.12	5261	5262	MS2	0/0	0	0	2ms21_2014_479_PFL_Fr1.mgf			15500000	11320000	9912000	16270000	6598000
Middle	A	tFNGTGPcHNVSTVQcTHGIKPVVSTQLLLSGSLAEk	8592	Unambiguous		0	0		N-Term(TMT6plex); C8(Carbamidomethyl); C16(Carbamidomethyl); K37(TMT6plex)	CID	1	0	1							No Proteins	Not Used		0.029	0.471	3143	2603	1.75	0	4015	3	1466.13	4396.38	0.02	14.71	1.12	5265	5266	MS2	0/0	0	0	2ms21_2014_479_PFL_Fr1.mgf
High	A	sFSNIISTLNPTAk	8593	Unambiguous	Glutaminyl-peptide cyclotransferase (Fragment) OS=Homo sapiens GN=QPCT PE=4 SV=1 - [B5MCZ9_HUMAN]	3	1	B5MCZ9	N-Term(TMT6plex); K14(TMT6plex)	CID	1	0	1	269800	138800	138800	213000	144300	152300	Unique	Used	11881	0	0.00134	2019	2015	4.81	0	2250000	2	976.067	1951.13	0	0.44	1.12	5267	5268	MS2	0/0	0	0	2ms21_2014_479_PFL_Fr1.mgf			269800	138800	138800	213000	144300
High	A	mTVSTLVLGEGATEAEISmTSTR	8597	Unambiguous	Protein AMBP OS=Homo sapiens GN=AMBP PE=1 SV=1 - [AMBP_HUMAN]	1	1	P02760	N-Term(TMT6plex); M19(Oxidation)	CID	1	0	1	16820	20190	16150	17290	14070	15480	Unique	Used	11882	0	0.00332	2438	2440	4.13	0	280100	2	1315.17	2629.34	0.01	5.53	1.12	5270	5271	MS2	0/0	0	0	2ms21_2014_479_PFL_Fr1.mgf			16820	20190	16150	17290	14070
High	A	fYTIEILk	8617	Unambiguous	Prolactin-inducible protein OS=Homo sapiens GN=PIP PE=1 SV=1 - [PIP_HUMAN]	1	1	P12273	N-Term(TMT6plex); K8(TMT6plex)	CID	1	0	1	11880	16280	12940	19490	14670	8500	Unique	Used	11888	0.003	0.103	1269	1185	1.77	0	134000	2	742.958	1484.91	0	-2.48	1.13	5285	5286	MS2	0/0	0	0	2ms21_2014_479_PFL_Fr1.mgf			11880	16280	12940	19490	14670
High	A	eDPQTFYYAVAVVk	8394	Unambiguous	Transferrin variant (Fragment) OS=Homo sapiens PE=2 SV=1 - [Q53H26_HUMAN]	4	1	Q53H26	N-Term(TMT6plex); K14(TMT6plex)	CID	1	0	1	865000	16770000	6579000	531600	12210000	12300000	Unique	Used	11890	0	2.21e-05	2580	2597	5.07	0	72580000	2	1044.58	2088.14	0	1.44	1.13	5290	5291	MS2	0/0	0	0	2ms21_2014_479_PFL_Fr1.mgf			865000	16770000	6579000	531600	12210000
High	A	yAASSYLSLTPEQWk	8208	Unambiguous	Uncharacterized protein OS=Homo sapiens PE=2 SV=1 - [Q6GMV8_HUMAN]|IGL@ protein OS=Homo sapiens GN=IGL@ PE=2 SV=1 - [Q567P1_HUMAN]	31	2	Q6GMV8;Q567P1	N-Term(TMT6plex); K15(TMT6plex)	CID	1	0	1	450500	487500	505900	369500	508500	723800	Not Unique	Not Used	11891	0	6.68e-05	2456	2374	6.33	0	5076000	2	1101.6	2202.19	0	0.83	1.13	5292	5293	MS2	0/0	0	0	2ms21_2014_479_PFL_Fr1.mgf			450500	487500	505900	369500	508500
High	A	iTFTFFR	8689	Unambiguous	Intrinsic factor-vitamin B12 receptor (Fragment) OS=Homo sapiens GN=CUBN PE=4 SV=1 - [Q7LC53_HUMAN]	2	1	Q7LC53	N-Term(TMT6plex)	CID	1	0	1	119400	127400	121200	112800	103900	146000	Unique	Used	11905	0.004	0.126	1180	1234	2.47	0	1115000	2	580.839	1160.67	0	3.76	1.13	5324	5325	MS2	0/0	0	0	2ms21_2014_479_PFL_Fr1.mgf			119400	127400	121200	112800	103900
High	A	tVGAALDILcPSGPIk	8722	Unambiguous	Isoform 3 of Beta-galactosidase OS=Homo sapiens GN=GLB1 - [BGAL_HUMAN]	8	1	P16278-3	N-Term(TMT6plex); C10(Carbamidomethyl); K16(TMT6plex)	CID	1	0	1	23510	27290	32930	28480	21630	31690	Unique	Used	11913	0	0.000468	2067	2018	4.1	0	266900	2	1035.61	2070.21	0	4.5	1.13	5342	5343	MS2	0/0	0	0	2ms21_2014_479_PFL_Fr1.mgf			23510	27290	32930	28480	21630
High	A	aQGFTEDTIVFLPQTDk	5298	Unambiguous	Prostaglandin-H2 D-isomerase OS=Homo sapiens GN=PTGDS PE=1 SV=1 - [PTGDS_HUMAN]	2	1	P41222	N-Term(TMT6plex); K17(TMT6plex)	CID	1	0	1	1846000	1232000	1072000	2108000	720300	1436000	Unique	Used	11924	0.001	0.0052	2910	3010	3.06	0	17940000	3	790.097	2368.28	0	-1.04	1.15	5367	5368	MS2	0/0	0	0	2ms21_2014_479_PFL_Fr1.mgf			1846000	1232000	1072000	2108000	720300
High	A	dSTYSLSSTLTLSk	4222	Unambiguous	Epididymis luminal protein 213 OS=Homo sapiens GN=HEL-213 PE=2 SV=1 - [V9HW34_HUMAN]|Protein IGKV3-11 OS=Homo sapiens GN=IGKV3-11 PE=4 SV=1 - [A0A087WZW8_HUMAN]	16	2	V9HW34;A0A087WZW8	N-Term(TMT6plex); K14(TMT6plex)	CID	1	0	1	2545000	1699000	2187000	1654000	1712000	2494000	Not Unique	Not Used	11929	0	0.000119	2379	2358	5.08	0	16880000	2	981.045	1961.08	0	-0.84	1.15	5378	5379	MS2	0/0	0	0	2ms21_2014_479_PFL_Fr1.mgf			2545000	1699000	2187000	1654000	1712000
High	A	eNFLFLTPDck	8170	Unambiguous	cDNA FLJ53075, highly similar to Kininogen-1 OS=Homo sapiens PE=2 SV=1 - [B4DPP8_HUMAN]	5	1	B4DPP8	N-Term(TMT6plex); C10(Carbamidomethyl); K11(TMT6plex)	CID	1	0	1	10590	5372	8122	9523	11050	8373	Unique	Used	11933	0.008	0.196	1759	1796	1.74	0	118400	3	614.669	1841.99	0	3.24	1.15	5386	5387	MS2	0/0	0	0	2ms21_2014_479_PFL_Fr1.mgf			10590	5372	8122	9523	11050
High	A	ySLTYIYTGLSk	8822	Unambiguous	Zinc-alpha-2-glycoprotein OS=Homo sapiens GN=AZGP1 PE=1 SV=2 - [ZA2G_HUMAN]	1	1	P25311	N-Term(TMT6plex); K12(TMT6plex)	CID	1	0	1	724500	2026000	1692000	1275000	1569000	3446000	Unique	Used	11939	0	0.000589	2099	1979	4.92	0	14850000	2	934.034	1867.06	0	-0.15	1.15	5400	5401	MS2	0/0	0	0	2ms21_2014_479_PFL_Fr1.mgf			724500	2026000	1692000	1275000	1569000
High	A	ySLTYIYTGLSk	8822	Unambiguous	Zinc-alpha-2-glycoprotein OS=Homo sapiens GN=AZGP1 PE=1 SV=2 - [ZA2G_HUMAN]	1	1	P25311	N-Term(TMT6plex); K12(TMT6plex)	CID	1	0	1	30310	47290	41750	27340	39760	77880	Unique	Used	11940	0.001	0.00547	2094	1972	1.07	0	674700	3	623.025	1867.06	0	0.04	1.15	5402	5403	MS2	0/0	0	0	2ms21_2014_479_PFL_Fr1.mgf			30310	47290	41750	27340	39760
High	A	eNFLFLTPDck	8170	Unambiguous	cDNA FLJ53075, highly similar to Kininogen-1 OS=Homo sapiens PE=2 SV=1 - [B4DPP8_HUMAN]	5	1	B4DPP8	N-Term(TMT6plex); C10(Carbamidomethyl); K11(TMT6plex)	CID	1	0	1	936000	497500	497600	934600	599900	544900	Unique	Used	11941	0	0.00212	1722	1784	4.13	0	5902000	2	921.499	1841.99	0	1.78	1.15	5404	5405	MS2	0/0	0	0	2ms21_2014_479_PFL_Fr1.mgf			936000	497500	497600	934600	599900
High	A	sWGIGAPSSVNPGYcVSLTSSTGFQk	8851	Unambiguous	cDNA FLJ75763, highly similar to Homo sapiens regenerating islet-derived 1 alpha (pancreatic stone protein, pancreatic thread protein) (REG1A), mRNA OS=Homo sapiens PE=2 SV=1 - [A8K7G6_HUMAN]	2	1	A8K7G6	N-Term(TMT6plex); C15(Carbamidomethyl); K26(TMT6plex)	CID	1	0	1							No Quan Values	Not Used	11946	0.005	0.147	2846	2831	3.18	0	206000	3	1049.2	3145.59	-0.01	-4.8	1.15	5415	5416	MS2	0/0	0	0	2ms21_2014_479_PFL_Fr1.mgf
High	A	yPDAVATWLNPDPSQk	8343	Unambiguous	Isoform D of Osteopontin OS=Homo sapiens GN=SPP1 - [OSTP_HUMAN]	6	1	P10451-4	N-Term(TMT6plex); K16(TMT6plex)	CID	1	0	1		38200		24340			No Quan Values	Not Used	11949	0	0.000228	2188	2219	4.31	0	228600	3	754.07	2260.2	0	-2.67	1.15	5422	5423	MS2	0/0	0	0	2ms21_2014_479_PFL_Fr1.mgf				38200		24340
High	A	yPDAVATWLNPDPSQk	8343	Unambiguous	Isoform D of Osteopontin OS=Homo sapiens GN=SPP1 - [OSTP_HUMAN]	6	1	P10451-4	N-Term(TMT6plex); K16(TMT6plex)	CID	1	0	1	657900	643100	824000	1030000	638900	666500	Unique	Used	11950	0	0.000124	2270	2289	4.14	0	1668000	2	1130.6	2260.2	0	0.43	1.15	5424	5425	MS2	0/0	0	0	2ms21_2014_479_PFL_Fr1.mgf			657900	643100	824000	1030000	638900
High	A	aQGFTEDTIVFLPQTDk	5298	Unambiguous	Prostaglandin-H2 D-isomerase OS=Homo sapiens GN=PTGDS PE=1 SV=1 - [PTGDS_HUMAN]	2	1	P41222	N-Term(TMT6plex); K17(TMT6plex)	CID	1	0	1	905100	650600	571400	866400	457200	650600	Unique	Used	11956	0.001	0.00337	2936	3020	5.1	0	12490000	2	1184.64	2368.28	0	-0.02	1.15	5437	5438	MS2	0/0	0	0	2ms21_2014_479_PFL_Fr1.mgf			905100	650600	571400	866400	457200
High	A	vVAQGVGIPEDSIFTMADR	7265	Unambiguous	Protein AMBP OS=Homo sapiens GN=AMBP PE=1 SV=1 - [AMBP_HUMAN]	1	1	P02760	N-Term(TMT6plex)	CID	1	0	1	85050	56680	42190	88100	54530	70860	Unique	Used	11958	0	0.000342	2381	2353	3.59	0	1721000	2	1117.59	2234.18	0.01	5.59	1.15	5441	5442	MS2	0/0	0	0	2ms21_2014_479_PFL_Fr1.mgf			85050	56680	42190	88100	54530
High	A	eDPQTFYYAVAVVk	8394	Unambiguous	Transferrin variant (Fragment) OS=Homo sapiens PE=2 SV=1 - [Q53H26_HUMAN]	4	1	Q53H26	N-Term(TMT6plex); K14(TMT6plex)	CID	1	0	1	43910	445400	169900	10800	369700	352700	Unique	Used	11969	0.001	0.00677	2458	2563	1.61	0	5866000	3	696.718	2088.14	0	-1.2	1.15	5466	5467	MS2	0/0	0	0	2ms21_2014_479_PFL_Fr1.mgf			43910	445400	169900	10800	369700
High	A	dSTYSLSSTLTLSk	4222	Unambiguous	Epididymis luminal protein 213 OS=Homo sapiens GN=HEL-213 PE=2 SV=1 - [V9HW34_HUMAN]|Protein IGKV3-11 OS=Homo sapiens GN=IGKV3-11 PE=4 SV=1 - [A0A087WZW8_HUMAN]	16	2	V9HW34;A0A087WZW8	N-Term(TMT6plex); K14(TMT6plex)	CID	1	0	1	2734000	1775000	2365000	1752000	1776000	2646000	Not Unique	Not Used	11975	0	0.000707	2421	2392	4.86	0	17010000	2	981.046	1961.09	0	0.52	1.17	5479	5480	MS2	0/0	0	0	2ms21_2014_479_PFL_Fr1.mgf			2734000	1775000	2365000	1752000	1776000
High	A	eDPQTFYYAVAVVk	8394	Unambiguous	Transferrin variant (Fragment) OS=Homo sapiens PE=2 SV=1 - [Q53H26_HUMAN]	4	1	Q53H26	N-Term(TMT6plex); K14(TMT6plex)	CID	1	0	1	207100	2525000	1015000	160800	1975000	2235000	Unique	Used	11978	0	3.06e-05	2498	2606	4.01	0	13160000	2	1044.57	2088.14	0	-0.31	1.17	5486	5487	MS2	0/0	0	0	2ms21_2014_479_PFL_Fr1.mgf			207100	2525000	1015000	160800	1975000
High	A	tQSSLVPALTDFVR	9002	Unambiguous	Protein CutA OS=Homo sapiens GN=CUTA PE=1 SV=1 - [C9IZG4_HUMAN]	4	1	C9IZG4	N-Term(TMT6plex)	CID	1	0	1			10510		11820	7719	No Quan Values	Not Used	11981	0	0.00165	2493	2466	4.52	0	514900	2	882.002	1763	0	3.68	1.17	5492	5493	MS2	0/0	0	0	2ms21_2014_479_PFL_Fr1.mgf					10510		11820
High	A	lNDLEEALQQAk	9093	Unambiguous	Keratin, type II cytoskeletal 2 epidermal OS=Homo sapiens GN=KRT2 PE=1 SV=2 - [K22E_HUMAN]	1	1	P35908	N-Term(TMT6plex); K12(TMT6plex)	CID	1	0	1	25850	33490	18410	13940	43580	45460	Unique	Used	12002	0	0.00105	2416	2310	4.12	0	1066000	2	915.521	1830.03	0	-1.51	1.17	5538	5539	MS2	0/0	0	0	2ms21_2014_479_PFL_Fr1.mgf			25850	33490	18410	13940	43580
High	A	mYLGYEYVTAIR	5987	Unambiguous	Transferrin variant (Fragment) OS=Homo sapiens PE=2 SV=1 - [Q53H26_HUMAN]	6	1	Q53H26	N-Term(TMT6plex)	CID	1	0	1	99240	825300	382500	101800	647600	757800	Unique	Used	12003	0.001	0.00858	1302	1331	3.94	0	4851000	2	854.449	1707.89	0	-3.73	1.17	5541	5542	MS2	0/0	0	0	2ms21_2014_479_PFL_Fr1.mgf			99240	825300	382500	101800	647600
High	A	mTVSTLVLGEGATEAEISmTSTR	8597	Unambiguous	Protein AMBP OS=Homo sapiens GN=AMBP PE=1 SV=1 - [AMBP_HUMAN]	1	1	P02760	N-Term(TMT6plex); M19(Oxidation)	CID	1	0	1	81080	81850	33610	87800	59730	90900	Unique	Used	12008	0	0.000481	2168	2177	4.44	0	2404000	3	877.112	2629.32	0	-1.3	1.17	5552	5553	MS2	0/0	0	0	2ms21_2014_479_PFL_Fr1.mgf			81080	81850	33610	87800	59730
High	A	iLEVVNQIQDEER	9126	Unambiguous	Endonuclease domain-containing 1 protein OS=Homo sapiens GN=ENDOD1 PE=1 SV=2 - [ENDD1_HUMAN]	1	1	O94919	N-Term(TMT6plex)	CID	1	0	1	8484		7120				Unique	Used	12009	0	0.000862	1684	1760	4.17	0	141600	3	605.332	1813.98	0	-2.74	1.17	5554	5555	MS2	0/0	0	0	2ms21_2014_479_PFL_Fr1.mgf			8484		7120
High	A	aIQIMYQNLQQDGLEk	9151	Unambiguous	Carboxypeptidase Q OS=Homo sapiens GN=CPQ PE=1 SV=1 - [CBPQ_HUMAN]	2	1	Q9Y646	N-Term(TMT6plex); K16(TMT6plex)	CID	1	0	1	24980	37050	40760	47900	21210	51610	Unique	Used	12016	0	0.000154	3180	3318	5.51	0	1714000	2	1175.65	2350.29	0	2.52	1.17	5569	5570	MS2	0/0	0	0	2ms21_2014_479_PFL_Fr1.mgf			24980	37050	40760	47900	21210
High	A	vAYLDPLELSEGk	9192	Unambiguous	Basal cell adhesion molecule OS=Homo sapiens GN=BCAM PE=4 SV=1 - [A0A087WXM8_HUMAN]	6	1	A0A087WXM8	N-Term(TMT6plex); K13(TMT6plex)	CID	1	0	1	314100	298700	197700	245000	316000	297900	Unique	Used	12025	0	0.00126	2240	2295	4.11	0	2899000	2	946.542	1892.08	0	-0.77	1.18	5589	5590	MS2	0/0	0	0	2ms21_2014_479_PFL_Fr1.mgf			314100	298700	197700	245000	316000
High	A	aGLIDDAFSLAR	9200	Unambiguous		0	0		N-Term(TMT6plex)	CID	1	0	1	107100	72140	54400	82070	81410	81130	No Proteins	Not Used	12027	0	0.00104	1785	1831	4.06	0	1118000	2	739.416	1477.82	0	1.77	1.18	5593	5594	MS2	0/0	0	0	2ms21_2014_479_PFL_Fr1.mgf			107100	72140	54400	82070	81410
High	A	lGGPEAGLGEYLFER	9209	Unambiguous		0	0		N-Term(TMT6plex)	CID	1	0	1	789400	329800	853200	593100	1928000	812200	No Proteins	Not Used	12029	0	0.000157	1974	1901	4.62	0	7858000	2	918.989	1836.97	0	0.93	1.18	5598	5599	MS2	0/0	0	0	2ms21_2014_479_PFL_Fr1.mgf			789400	329800	853200	593100	1928000
High	A	wDEELAAFAk	9216	Unambiguous		0	0		N-Term(TMT6plex); K10(TMT6plex)	CID	1	0	1	28020	19120	21180	26010	33320	46040	No Proteins	Not Used	12031	0.003	0.114	1637	1676	1.8	0	608300	3	546.637	1637.9	0	1.32	1.18	5602	5603	MS2	0/0	0	0	2ms21_2014_479_PFL_Fr1.mgf			28020	19120	21180	26010	33320
High	A	lTLTPWVGLR	9222	Unambiguous	cDNA FLJ58441, highly similar to Attractin OS=Homo sapiens PE=2 SV=1 - [B4DZ36_HUMAN]	4	1	B4DZ36	N-Term(TMT6plex)	CID	1	0	1	1081000	745600	703700	1328000	773000	850900	Unique	Used	12033	0.002	0.0326	953	942	2.68	0	7836000	2	692.93	1384.85	0	1.18	1.18	5607	5608	MS2	0/0	0	0	2ms21_2014_479_PFL_Fr1.mgf			1081000	745600	703700	1328000	773000
High	A	sIAQYWLGcPAPGHL	9232	Unambiguous		0	0		N-Term(TMT6plex); C9(Carbamidomethyl)	CID	1	0	1	208100	226100	145200	186300	183800	209000	No Proteins	Not Used	12035	0	0.00128	1519	1408	3.68	0	2794000	2	949.993	1898.98	0	-0.04	1.18	5611	5612	MS2	0/0	0	0	2ms21_2014_479_PFL_Fr1.mgf			208100	226100	145200	186300	183800
High	A	eDPQTFYYAVAVVk	8394	Unambiguous	Transferrin variant (Fragment) OS=Homo sapiens PE=2 SV=1 - [Q53H26_HUMAN]	4	1	Q53H26	N-Term(TMT6plex); K14(TMT6plex)	CID	1	0	1	113000	929400	418900	80890	716300	762600	Unique	Used	12036	0	4.13e-05	2509	2605	4.4	0	4632000	2	1044.57	2088.14	0	0.39	1.18	5613	5614	MS2	0/0	0	0	2ms21_2014_479_PFL_Fr1.mgf			113000	929400	418900	80890	716300
High	A	tVAAPSVFIFPPSDEQLk	9246	Unambiguous	Epididymis luminal protein 213 OS=Homo sapiens GN=HEL-213 PE=2 SV=1 - [V9HW34_HUMAN]|Protein IGKV3-11 OS=Homo sapiens GN=IGKV3-11 PE=4 SV=1 - [A0A087WZW8_HUMAN]	15	2	V9HW34;A0A087WZW8	N-Term(TMT6plex); K18(TMT6plex)	CID	1	0	1	145200	130000	95180	99830	113800	139900	Not Unique	Not Used	12038	0	6.47e-05	2771	2748	3.67	0	5722000	3	802.123	2404.36	0	1.23	1.18	5618	5619	MS2	0/0	0	0	2ms21_2014_479_PFL_Fr1.mgf			145200	130000	95180	99830	113800
High	A	qVILTLQPTLVAVGk	9248	Unambiguous	Intercellular adhesion molecule 2 (Fragment) OS=Homo sapiens GN=ICAM2 PE=4 SV=3 - [J3QQR8_HUMAN]	8	1	J3QQR8	N-Term(TMT6plex); K15(TMT6plex)	CID	1	0	1	492100	373900	214700	360600	295900	283800	Unique	Used	12039	0	5.29e-05	452	433	4.62	0	2968000	2	1019.66	2038.31	0	1.33	1.18	5620	5621	MS2	0/0	0	0	2ms21_2014_479_PFL_Fr1.mgf			492100	373900	214700	360600	295900
High	A	lQVLLLTDGVGR	9252	Unambiguous	Intrinsic factor-vitamin B12 receptor (Fragment) OS=Homo sapiens GN=CUBN PE=4 SV=1 - [Q7LC53_HUMAN]	2	1	Q7LC53	N-Term(TMT6plex)	CID	1	0	1		11470	13770	10970	15360	19020	No Quan Values	Not Used	12040	0	0.00259	1062	1089	3.41	0	1010000	2	756.968	1512.93	0	-1.75	1.18	5622	5623	MS2	0/0	0	0	2ms21_2014_479_PFL_Fr1.mgf				11470	13770	10970	15360
Middle	A	qVILTLQPTLVAVGk	9248	Unambiguous	Intercellular adhesion molecule 2 (Fragment) OS=Homo sapiens GN=ICAM2 PE=4 SV=3 - [J3QQR8_HUMAN]	8	1	J3QQR8	N-Term(TMT6plex); K15(TMT6plex)	CID	1	0	1		16250	17950	19810	25080	14940	No Quan Values	Not Used	12041	0.026	0.426	455	433	2.17	0	188500	3	680.107	2038.31	0	0.97	1.18	5624	5625	MS2	0/0	0	0	2ms21_2014_479_PFL_Fr1.mgf				16250	17950	19810	25080
High	A	tVAAPSVFIFPPSDEQLk	9246	Unambiguous	Epididymis luminal protein 213 OS=Homo sapiens GN=HEL-213 PE=2 SV=1 - [V9HW34_HUMAN]|Protein IGKV3-11 OS=Homo sapiens GN=IGKV3-11 PE=4 SV=1 - [A0A087WZW8_HUMAN]	15	2	V9HW34;A0A087WZW8	N-Term(TMT6plex); K18(TMT6plex)	CID	1	0	1	1080000	754200	1085000	564600	792100	1104000	Not Unique	Not Used	12046	0	0.00121	2784	2712	4.5	0	11530000	2	1202.69	2404.36	0.01	4.84	1.18	5636	5637	MS2	0/0	0	0	2ms21_2014_479_PFL_Fr1.mgf			1080000	754200	1085000	564600	792100
High	A	aPLVcLPVFVSR	9287	Unambiguous		0	0		N-Term(TMT6plex); C5(Carbamidomethyl)	CID	1	0	1	120300	117200	130100	152500	96320	128200	No Proteins	Not Used	12048	0.001	0.0163	1898	1709	3.14	0	1514000	2	793.97	1586.93	0	2.43	1.18	5640	5641	MS2	0/0	0	0	2ms21_2014_479_PFL_Fr1.mgf			120300	117200	130100	152500	96320
High	A	eTLFSVMPGLk	6033	Unambiguous	cDNA FLJ51742, highly similar to Inter-alpha-trypsin inhibitor heavy chain H4 OS=Homo sapiens PE=2 SV=1 - [B7Z544_HUMAN]	7	1	B7Z544	N-Term(TMT6plex); K11(TMT6plex)	CID	1	0	1	2735000	1541000	2000000	2469000	1496000	2112000	Unique	Used	12062	0	0.000612	1840	1866	4.36	0	16780000	2	840.494	1679.98	0	0.32	1.18	5671	5672	MS2	0/0	0	0	2ms21_2014_479_PFL_Fr1.mgf			2735000	1541000	2000000	2469000	1496000
Middle	A	eTLFSVMPGLk	6033	Unambiguous	cDNA FLJ51742, highly similar to Inter-alpha-trypsin inhibitor heavy chain H4 OS=Homo sapiens PE=2 SV=1 - [B7Z544_HUMAN]	7	1	B7Z544	N-Term(TMT6plex); K11(TMT6plex)	CID	1	0	1		9642	12320				No Quan Values	Not Used	12064	0.012	0.237	1741	1806	1.94	0	113900	3	560.665	1679.98	0	-0.08	1.18	5676	5677	MS2	0/0	0	0	2ms21_2014_479_PFL_Fr1.mgf				9642	12320
High	A	vIHTDNGPNFTSAIMk	9359	Unambiguous		0	0		N-Term(TMT6plex); K16(TMT6plex)	CID	1	0	1							No Proteins	Not Used	12066	0.008	0.196	2460	2478	1.76	0	30590	3	735.069	2203.19	0	-1.28	1.2	5680	5681	MS2	0/0	0	0	2ms21_2014_479_PFL_Fr1.mgf
High	A	mTVSTLVLGEGATEAEISmTSTR	8597	Unambiguous	Protein AMBP OS=Homo sapiens GN=AMBP PE=1 SV=1 - [AMBP_HUMAN]	1	1	P02760	N-Term(TMT6plex); M19(Oxidation)	CID	1	0	1	13050	13800	14810	16140	12020	13960	Unique	Used	12068	0	0.000525	2259	2249	4	0	261000	2	1315.17	2629.33	0	0.14	1.2	5684	5685	MS2	0/0	0	0	2ms21_2014_479_PFL_Fr1.mgf			13050	13800	14810	16140	12020
High	A	mTVSTLVLGEGATEAEISMTSTR	8597	Unambiguous	Protein AMBP OS=Homo sapiens GN=AMBP PE=1 SV=1 - [AMBP_HUMAN]	1	1	P02760	N-Term(TMT6plex); M1(Oxidation)	CID	1	0	1	13050	13800	14810	16140	12020	13960	Redundant	Not Used	12068	0	4.81e-05	2259	2249	4	0	261000	2	1315.17	2629.33	0	0.14	1.2	5684	5685	MS2	0/0	0	0	2ms21_2014_479_PFL_Fr1.mgf			13050	13800	14810	16140	12020
High	A	aQGFTEDTIVFLPQTDk	5298	Unambiguous	Prostaglandin-H2 D-isomerase OS=Homo sapiens GN=PTGDS PE=1 SV=1 - [PTGDS_HUMAN]	2	1	P41222	N-Term(TMT6plex); K17(TMT6plex)	CID	1	0	1	99780	63950	70210	103200	35310	78770	Unique	Used	12069	0.001	0.0039	2977	3056	3.53	0	1929000	3	790.099	2368.28	0	0.97	1.2	5687	5688	MS2	0/0	0	0	2ms21_2014_479_PFL_Fr1.mgf			99780	63950	70210	103200	35310
High	A	dSTYSLSSTLTLSk	4222	Unambiguous	Epididymis luminal protein 213 OS=Homo sapiens GN=HEL-213 PE=2 SV=1 - [V9HW34_HUMAN]|Protein IGKV3-11 OS=Homo sapiens GN=IGKV3-11 PE=4 SV=1 - [A0A087WZW8_HUMAN]	16	2	V9HW34;A0A087WZW8	N-Term(TMT6plex); K14(TMT6plex)	CID	1	0	1	1597000	997100	1406000	977800	987800	1498000	Not Unique	Not Used	12075	0	0.000309	2416	2393	4.94	0	9455000	2	981.046	1961.09	0	0.4	1.2	5700	5701	MS2	0/0	0	0	2ms21_2014_479_PFL_Fr1.mgf			1597000	997100	1406000	977800	987800
High	A	tVAAPSVFIFPPSDEQLk	9246	Unambiguous	Epididymis luminal protein 213 OS=Homo sapiens GN=HEL-213 PE=2 SV=1 - [V9HW34_HUMAN]|Protein IGKV3-11 OS=Homo sapiens GN=IGKV3-11 PE=4 SV=1 - [A0A087WZW8_HUMAN]	15	2	V9HW34;A0A087WZW8	N-Term(TMT6plex); K18(TMT6plex)	CID	1	0	1	2679000	1803000	2328000	1673000	2109000	2898000	Not Unique	Not Used	12078	0	1.59e-05	2772	2675	5.04	0	22420000	2	1202.68	2404.36	0	3.52	1.2	5707	5708	MS2	0/0	0	0	2ms21_2014_479_PFL_Fr1.mgf			2679000	1803000	2328000	1673000	2109000
High	A	ySLTYIYTGLSk	8822	Unambiguous	Zinc-alpha-2-glycoprotein OS=Homo sapiens GN=AZGP1 PE=1 SV=2 - [ZA2G_HUMAN]	1	1	P25311	N-Term(TMT6plex); K12(TMT6plex)	CID	1	0	1	135900	269300	261200	188000	234000	437400	Unique	Used	12082	0	0.000288	2095	2002	5.74	0	2289000	2	934.035	1867.06	0	0.57	1.2	5717	5718	MS2	0/0	0	0	2ms21_2014_479_PFL_Fr1.mgf			135900	269300	261200	188000	234000
High	A	vVAQGVGIPEDSIFTMADR	7265	Unambiguous	Protein AMBP OS=Homo sapiens GN=AMBP PE=1 SV=1 - [AMBP_HUMAN]	1	1	P02760	N-Term(TMT6plex)	CID	1	0	1							No Quan Values	Not Used	12091	0	2.11e-05	2278	2256	4.62	0	6231000	3	745.396	2234.17	0	1.43	1.2	5739	5740	MS2	0/0	0	0	2ms21_2014_479_PFL_Fr1.mgf
High	A	vVAQGVGIPEDSIFTMADR	7265	Unambiguous	Protein AMBP OS=Homo sapiens GN=AMBP PE=1 SV=1 - [AMBP_HUMAN]	1	1	P02760	N-Term(TMT6plex)	CID	1	0	1	7884000	7133000	6593000	10530000	6080000	7435000	Unique	Used	12092	0	3.38e-06	2252	2266	5.62	0	93720000	2	1117.59	2234.17	0	2.64	1.2	5741	5742	MS2	0/0	0	0	2ms21_2014_479_PFL_Fr1.mgf			7884000	7133000	6593000	10530000	6080000
High	A	vVAQGVGIPEDSIFTMADR	7265	Unambiguous	Protein AMBP OS=Homo sapiens GN=AMBP PE=1 SV=1 - [AMBP_HUMAN]	1	1	P02760	N-Term(TMT6plex)	CID	1	0	1	827900	703000	653400	1208000	811100	861900	Unique	Used	12099	0	3.49e-05	2278	2256	3.83	0	20930000	2	1117.59	2234.17	0	1.44	1.2	5757	5758	MS2	0/0	0	0	2ms21_2014_479_PFL_Fr1.mgf			827900	703000	653400	1208000	811100
Middle	A	dIVLTQSPLSLPVTPGEPASIScR	9562	Unambiguous		0	0		N-Term(TMT6plex); C23(Carbamidomethyl)	CID	1	0	1	125900	69470	83370	129100	98740	128600	No Proteins	Not Used	12113	0.012	0.232	3592	3429	2.9	0	1770000	3	922.838	2766.5	0	3.39	1.22	5789	5790	MS2	0/0	0	0	2ms21_2014_479_PFL_Fr1.mgf			125900	69470	83370	129100	98740
High	A	eVPLNTIIFMGR	7320	Unambiguous	Antithrombin-III OS=Homo sapiens GN=SERPINC1 PE=1 SV=1 - [ANT3_HUMAN]	1	1	P01008	N-Term(TMT6plex)	CID	1	0	1	28580	117500	82390	46660	48690	84310	Unique	Used	12116	0	0.00217	2066	2006	3.5	0	1778000	2	809.96	1618.91	0	-3.81	1.22	5796	5797	MS2	0/0	0	0	2ms21_2014_479_PFL_Fr1.mgf			28580	117500	82390	46660	48690
High	A	yAASSYLSLTPEQWk	8208	Unambiguous	Uncharacterized protein OS=Homo sapiens PE=2 SV=1 - [Q6GMV8_HUMAN]|IGL@ protein OS=Homo sapiens GN=IGL@ PE=2 SV=1 - [Q567P1_HUMAN]	31	2	Q6GMV8;Q567P1	N-Term(TMT6plex); K15(TMT6plex)	CID	1	0	1	16450	11450	13210	16060	17120	22390	Not Unique	Not Used	12122	0.002	0.0351	2718	2609	4.32	0	179400	2	1101.61	2202.22	0.02	14.03	1.22	5809	5810	MS2	0/0	0	0	2ms21_2014_479_PFL_Fr1.mgf			16450	11450	13210	16060	17120
High	A	gATYNIIVEALk	9603	Unambiguous	Putative uncharacterized protein DKFZp686O12165 (Fragment) OS=Homo sapiens GN=DKFZp686O12165 PE=1 SV=1 - [Q6MZM7_HUMAN]	3	1	Q6MZM7	N-Term(TMT6plex); K12(TMT6plex)	CID	1	0	1	1305000	1202000	727600	2001000	817800	947200	Unique	Used	12124	0	0.000994	1672	1590	4.26	0	9529000	2	875.532	1750.06	0	2.87	1.22	5814	5815	MS2	0/0	0	0	2ms21_2014_479_PFL_Fr1.mgf			1305000	1202000	727600	2001000	817800
High	A	tYMLAFDVNDEk	5470	Unambiguous	Alpha-1-acid glycoprotein 1 OS=Homo sapiens GN=ORM1 PE=1 SV=1 - [A1AG1_HUMAN]	1	1	P02763	N-Term(TMT6plex); K12(TMT6plex)	CID	1	0	1	46340	72030	70000	43860	56690	78880	Unique	Used	12127	0.002	0.0573	1305	1310	2.94	0	1099000	2	952.49	1903.97	-0.01	-7.71	1.22	5821	5822	MS2	0/0	0	0	2ms21_2014_479_PFL_Fr1.mgf			46340	72030	70000	43860	56690
High	A	aIGAVPLIQGEYMIPcEk	8054	Unambiguous	Cathepsin D OS=Homo sapiens GN=CTSD PE=1 SV=1 - [CATD_HUMAN]	1	1	P07339	N-Term(TMT6plex); C16(Carbamidomethyl); K18(TMT6plex)	CID	1	0	1	55700	48010	145400	67580	43030	52540	Unique	Used	12133	0	0.000289	2989	2916	4.67	0	757600	2	1224.18	2447.35	0	2.57	1.22	5835	5836	MS2	0/0	0	0	2ms21_2014_479_PFL_Fr1.mgf			55700	48010	145400	67580	43030
High	A	mYLGYEYVTAIR	5987	Unambiguous	Transferrin variant (Fragment) OS=Homo sapiens PE=2 SV=1 - [Q53H26_HUMAN]	6	1	Q53H26	N-Term(TMT6plex)	CID	1	0	1		34840	8961		22570	34050	No Quan Values	Not Used	12134	0.001	0.00787	1388	1446	3.87	0	769200	2	854.453	1707.9	0	0.7	1.22	5837	5838	MS2	0/0	0	0	2ms21_2014_479_PFL_Fr1.mgf				34840	8961		22570
High	A	iPGDQVVSVVFIk	9676	Unambiguous	Heparan sulfate proteoglycan 2 (Perlecan), isoform CRA_b OS=Homo sapiens GN=HSPG2 PE=4 SV=1 - [A0A024RAB6_HUMAN]	2	1	A0A024RAB6	N-Term(TMT6plex); K13(TMT6plex)	CID	1	0	1	454500	355500	271700	579300	314500	419700	Unique	Used	12140	0.001	0.00492	1913	1915	4.37	0	3668000	2	930.069	1859.13	0	-4.95	1.22	5850	5851	MS2	0/0	0	0	2ms21_2014_479_PFL_Fr1.mgf			454500	355500	271700	579300	314500
Middle	A	eELSALVEMEHDAPWDIDDL	9682	Unambiguous		0	0		N-Term(TMT6plex)	CID	1	0	1							No Proteins	Not Used	12141	0.016	0.317	916	896	1.89	0	85780	3	852.744	2556.22	0.01	6.28	1.22	5852	5853	MS2	0/0	0	0	2ms21_2014_479_PFL_Fr1.mgf
High	A	aQGFTEDTIVFLPQTDk	5298	Unambiguous	Prostaglandin-H2 D-isomerase OS=Homo sapiens GN=PTGDS PE=1 SV=1 - [PTGDS_HUMAN]	2	1	P41222	N-Term(TMT6plex); K17(TMT6plex)	CID	1	0	1	117900	109200	79010	141600	65440	119700	Unique	Used	12143	0	4.52e-05	2990	3029	4.61	0	2755000	2	1184.65	2368.29	0	3.79	1.22	5857	5858	MS2	0/0	0	0	2ms21_2014_479_PFL_Fr1.mgf			117900	109200	79010	141600	65440
High	A	iPGDQVVSVVFIk	9676	Unambiguous	Heparan sulfate proteoglycan 2 (Perlecan), isoform CRA_b OS=Homo sapiens GN=HSPG2 PE=4 SV=1 - [A0A024RAB6_HUMAN]	2	1	A0A024RAB6	N-Term(TMT6plex); K13(TMT6plex)	CID	1	0	1	11340		8643	16400	13370	11970	Unique	Used	12149	0.001	0.029	1644	1693	2.24	0	225900	3	620.384	1859.14	0	-1.8	1.23	5870	5871	MS2	0/0	0	0	2ms21_2014_479_PFL_Fr1.mgf			11340		8643	16400	13370
High	A	tVAAPSVFIFPPSDEQLk	9246	Unambiguous	Epididymis luminal protein 213 OS=Homo sapiens GN=HEL-213 PE=2 SV=1 - [V9HW34_HUMAN]|Protein IGKV3-11 OS=Homo sapiens GN=IGKV3-11 PE=4 SV=1 - [A0A087WZW8_HUMAN]	15	2	V9HW34;A0A087WZW8	N-Term(TMT6plex); K18(TMT6plex)	CID	1	0	1		177900		212400	127600		No Quan Values	Not Used	12163	0	0.000241	2804	2830	3.5	0	15080000	3	802.123	2404.35	0	0.16	1.23	5901	5902	MS2	0/0	0	0	2ms21_2014_479_PFL_Fr1.mgf				177900		212400	127600
High	A	aIGAVPLIQGEYMIPcEk	8054	Unambiguous	Cathepsin D OS=Homo sapiens GN=CTSD PE=1 SV=1 - [CATD_HUMAN]	1	1	P07339	N-Term(TMT6plex); C16(Carbamidomethyl); K18(TMT6plex)	CID	1	0	1		15110	11660			15680	No Quan Values	Not Used	12164	0.002	0.0344	2978	2886	2.89	0	1056000	3	816.453	2447.34	0	0.27	1.23	5903	5904	MS2	0/0	0	0	2ms21_2014_479_PFL_Fr1.mgf				15110	11660
High	A	dFPAVPYSGWDFNDGk	9793	Unambiguous	Pancreatic alpha-amylase OS=Homo sapiens GN=AMY2A PE=1 SV=2 - [AMYP_HUMAN]	5	1	P04746	N-Term(TMT6plex); K16(TMT6plex)	CID	1	0	1	150100	51690	94540	104200	95380	93310	Unique	Used	12169	0	7.4e-05	1354	1313	4.78	0	2009000	3	758.38	2273.13	0	-0.47	1.23	5914	5915	MS2	0/0	0	0	2ms21_2014_479_PFL_Fr1.mgf			150100	51690	94540	104200	95380
High	A	dFPAVPYSGWDFNDGk	9793	Unambiguous	Pancreatic alpha-amylase OS=Homo sapiens GN=AMY2A PE=1 SV=2 - [AMYP_HUMAN]	5	1	P04746	N-Term(TMT6plex); K16(TMT6plex)	CID	1	0	1	244300	53940	125100	107700	86000	86570	Unique	Used	12170	0	5.24e-05	1400	1389	5.35	0	2593000	2	1137.07	2273.13	0	1.5	1.23	5916	5917	MS2	0/0	0	0	2ms21_2014_479_PFL_Fr1.mgf			244300	53940	125100	107700	86000
High	A	tVAAPSVFIFPPSDEQLk	9246	Unambiguous	Epididymis luminal protein 213 OS=Homo sapiens GN=HEL-213 PE=2 SV=1 - [V9HW34_HUMAN]|Protein IGKV3-11 OS=Homo sapiens GN=IGKV3-11 PE=4 SV=1 - [A0A087WZW8_HUMAN]	15	2	V9HW34;A0A087WZW8	N-Term(TMT6plex); K18(TMT6plex)	CID	1	0	1	867900	493000	607500	404000	564000	778400	Not Unique	Not Used	12174	0	0.00109	2818	2751	4.14	0	13350000	2	1202.68	2404.36	0	2.4	1.23	5925	5926	MS2	0/0	0	0	2ms21_2014_479_PFL_Fr1.mgf			867900	493000	607500	404000	564000
High	A	gINQPIIYSIFR	9820	Unambiguous		0	0		N-Term(TMT6plex)	CID	1	0	1	45900	27390	28740	76520	47630	44130	No Proteins	Not Used	12176	0	0.00229	2000	1981	3.48	0	702100	2	825.481	1649.95	0	-2.15	1.23	5929	5930	MS2	0/0	0	0	2ms21_2014_479_PFL_Fr1.mgf			45900	27390	28740	76520	47630
High	A	eTLFSVMPGLk	6033	Unambiguous	cDNA FLJ51742, highly similar to Inter-alpha-trypsin inhibitor heavy chain H4 OS=Homo sapiens PE=2 SV=1 - [B7Z544_HUMAN]	7	1	B7Z544	N-Term(TMT6plex); K11(TMT6plex)	CID	1	0	1	35720	26470	27420	36220	15800	35450	Unique	Used	12204	0.001	0.0036	1799	1823	4.4	0	1073000	2	840.497	1679.99	0	3.81	1.25	5991	5992	MS2	0/0	0	0	2ms21_2014_479_PFL_Fr1.mgf			35720	26470	27420	36220	15800
High	A	dSTYSLSSTLTLSk	4222	Unambiguous	Epididymis luminal protein 213 OS=Homo sapiens GN=HEL-213 PE=2 SV=1 - [V9HW34_HUMAN]|Protein IGKV3-11 OS=Homo sapiens GN=IGKV3-11 PE=4 SV=1 - [A0A087WZW8_HUMAN]	16	2	V9HW34;A0A087WZW8	N-Term(TMT6plex); K14(TMT6plex)	CID	1	0	1	667900	429000	534100	442900	404600	596300	Not Unique	Not Used	12207	0	0.000448	2538	2523	4.4	0	4491000	2	981.048	1961.09	0	2.58	1.25	5998	5999	MS2	0/0	0	0	2ms21_2014_479_PFL_Fr1.mgf			667900	429000	534100	442900	404600
High	A	gFFADYEIPNLQk	9953	Unambiguous		0	0		N-Term(TMT6plex); K13(TMT6plex)	CID	1	0	1	127000	111900	89570	132100	76980	113300	No Proteins	Not Used	12210	0	0.000648	2256	2341	4.38	0	1752000	2	1000.55	2000.1	0.01	5.07	1.25	6004	6005	MS2	0/0	0	0	2ms21_2014_479_PFL_Fr1.mgf			127000	111900	89570	132100	76980
High	A	tVAAPSVFIFPPSDEQLk	9246	Unambiguous	Epididymis luminal protein 213 OS=Homo sapiens GN=HEL-213 PE=2 SV=1 - [V9HW34_HUMAN]|Protein IGKV3-11 OS=Homo sapiens GN=IGKV3-11 PE=4 SV=1 - [A0A087WZW8_HUMAN]	15	2	V9HW34;A0A087WZW8	N-Term(TMT6plex); K18(TMT6plex)	CID	1	0	1	4446000	3471000	4320000	2617000	3571000	4662000	Not Unique	Not Used	12211	0	0.000154	2776	2692	4.58	0	38490000	2	1202.68	2404.36	0	3.01	1.25	6007	6008	MS2	0/0	0	0	2ms21_2014_479_PFL_Fr1.mgf			4446000	3471000	4320000	2617000	3571000
High	A	aQPVQVAEGSEPDGFWEALGGk	9972	Unambiguous	cDNA FLJ35478 fis, clone SMINT2007796, highly similar to Gelsolin OS=Homo sapiens PE=2 SV=1 - [B3KS49_HUMAN]	13	1	B3KS49	N-Term(TMT6plex); K22(TMT6plex)	CID	1	0	1	24010	34810	24830	24500	29750	31020	Unique	Used	12214	0	7.69e-06	2996	3059	4.45	0	994400	3	910.81	2730.42	0	0.38	1.25	6013	6014	MS2	0/0	0	0	2ms21_2014_479_PFL_Fr1.mgf			24010	34810	24830	24500	29750
High	A	aQPVQVAEGSEPDGFWEALGGk	9972	Unambiguous	cDNA FLJ35478 fis, clone SMINT2007796, highly similar to Gelsolin OS=Homo sapiens PE=2 SV=1 - [B3KS49_HUMAN]	13	1	B3KS49	N-Term(TMT6plex); K22(TMT6plex)	CID	1	0	1	84950	52310	58130	84650	34910	52200	Unique	Used	12220	0	0.00331	2942	3079	4.61	0	1074000	2	1365.71	2730.41	0	-1.05	1.25	6026	6027	MS2	0/0	0	0	2ms21_2014_479_PFL_Fr1.mgf			84950	52310	58130	84650	34910
High	A	lGQSLDcNAEVYVVPWEk	9999	Unambiguous	cDNA FLJ53075, highly similar to Kininogen-1 OS=Homo sapiens PE=2 SV=1 - [B4DPP8_HUMAN]	6	1	B4DPP8	N-Term(TMT6plex); C7(Carbamidomethyl); K18(TMT6plex)	CID	1	0	1	685900	420000	432000	806300	571000	583500	Unique	Used	12222	0	0.00105	2866	2881	3.4	0	6956000	2	1283.18	2565.35	0	2.06	1.25	6031	6032	MS2	0/0	0	0	2ms21_2014_479_PFL_Fr1.mgf			685900	420000	432000	806300	571000
High	A	iGPDNLPYVQILk	10087	Unambiguous		0	0		N-Term(TMT6plex); K13(TMT6plex)	CID	1	0	1	77840	88060	74310	101000	53640	73530	No Proteins	Not Used	12245	0	0.00257	1541	1573	4.1	0	1094000	2	964.586	1928.16	0	1.2	1.27	6082	6083	MS2	0/0	0	0	2ms21_2014_479_PFL_Fr1.mgf			77840	88060	74310	101000	53640
High	A	aVLDVFEEGTEASAATAVk	10100	Unambiguous	Alpha-1-antichymotrypsin OS=Homo sapiens GN=SERPINA3 PE=1 SV=2 - [AACT_HUMAN]	3	1	P01011	N-Term(TMT6plex); K19(TMT6plex)	CID	1	0	1	24350	45700	41640	17530	19990	34850	Unique	Used	12248	0	3.83e-05	3328	3288	4.74	0	613600	2	1183.65	2366.29	0	0.33	1.27	6089	6090	MS2	0/0	0	0	2ms21_2014_479_PFL_Fr1.mgf			24350	45700	41640	17530	19990
High	A	aGATLDLLVENMGR	10108	Unambiguous	Isoform 3 of Beta-galactosidase OS=Homo sapiens GN=GLB1 - [BGAL_HUMAN]	8	1	P16278-3	N-Term(TMT6plex)	CID	1	0	1	297500	338300	356300	317300	192700	308100	Unique	Used	12250	0	0.000232	1897	1931	4.72	0	3291000	2	844.964	1688.92	0	0.27	1.27	6093	6094	MS2	0/0	0	0	2ms21_2014_479_PFL_Fr1.mgf			297500	338300	356300	317300	192700
High	A	yWGVASFLQk	10137	Unambiguous	Retinol binding protein 4, plasma, isoform CRA_b OS=Homo sapiens GN=RBP4 PE=1 SV=2 - [Q5VY30_HUMAN]	2	1	Q5VY30	N-Term(TMT6plex); K10(TMT6plex)	CID	1	0	1	780300	703800	362500	1209000	483900	649800	Unique	Used	12257	0.001	0.00446	1745	1847	4.03	0	5873000	2	828.981	1656.96	0	2.38	1.27	6108	6109	MS2	0/0	0	0	2ms21_2014_479_PFL_Fr1.mgf			780300	703800	362500	1209000	483900
High	A	aFPALTSLDLSDNPGLGER	10140	Unambiguous	Monocyte differentiation antigen CD14 OS=Homo sapiens PE=2 SV=1 - [B2R888_HUMAN]	3	1	B2R888	N-Term(TMT6plex)	CID	1	0	1	1131000	681500	649900	1127000	470600	805800	Unique	Used	12258	0	1.32e-05	2357	2313	5.07	0	9647000	2	1101.59	2202.17	0	3.42	1.27	6111	6112	MS2	0/0	0	0	2ms21_2014_479_PFL_Fr1.mgf			1131000	681500	649900	1127000	470600
High	A	lFDSDPITVTVPVEVSR	10144	Unambiguous	Isoform 4 of Clusterin OS=Homo sapiens GN=CLU - [CLUS_HUMAN]	4	1	P10909-4	N-Term(TMT6plex)	CID	1	0	1	17870	21510	29360	15620	19030	23960	Unique	Used	12259	0	0.00111	2720	2621	4.42	0	455000	2	1052.08	2103.16	0	1.05	1.27	6113	6114	MS2	0/0	0	0	2ms21_2014_479_PFL_Fr1.mgf			17870	21510	29360	15620	19030
High	A	yWGVASFLQk	10137	Unambiguous	Retinol binding protein 4, plasma, isoform CRA_b OS=Homo sapiens GN=RBP4 PE=1 SV=2 - [Q5VY30_HUMAN]	2	1	Q5VY30	N-Term(TMT6plex); K10(TMT6plex)	CID	1	0	1	15990	14230		19380		13660	Unique	Used	12261	0	0.000634	1706	1841	2.96	0	294600	3	552.988	1656.95	0	-1.57	1.27	6117	6118	MS2	0/0	0	0	2ms21_2014_479_PFL_Fr1.mgf			15990	14230		19380
High	A	aFPALTSLDLSDNPGLGER	10140	Unambiguous	Monocyte differentiation antigen CD14 OS=Homo sapiens PE=2 SV=1 - [B2R888_HUMAN]	3	1	B2R888	N-Term(TMT6plex)	CID	1	0	1	60060	36210	38840	36930	40040	52770	Unique	Used	12272	0.002	0.041	2261	2270	3.84	0	933800	3	734.726	2202.16	0	1.95	1.27	6141	6142	MS2	0/0	0	0	2ms21_2014_479_PFL_Fr1.mgf			60060	36210	38840	36930	40040
High	A	aVLDVFEEGTEASAATAVk	10100	Unambiguous	Alpha-1-antichymotrypsin OS=Homo sapiens GN=SERPINA3 PE=1 SV=2 - [AACT_HUMAN]	3	1	P01011	N-Term(TMT6plex); K19(TMT6plex)	CID	1	0	1	803600	2281000	2050000	920500	958400	1812000	Unique	Used	12282	0	0.000108	3340	3281	5.89	0	13220000	2	1183.65	2366.29	0	2.4	1.27	6164	6165	MS2	0/0	0	0	2ms21_2014_479_PFL_Fr1.mgf			803600	2281000	2050000	920500	958400
Middle	A	dVAGLYEEIWK	10291	Unambiguous		0	0		N-Term(TMT6plex)	CID	1	0	1	24420	41930	19480	36210	42970	34090	No Proteins	Not Used	12300	0.026	0.426	1346	1298	1.99	0	423600	2	776.417	1551.83	0	0.03	1.28	6204	6205	MS2	0/0	0	0	2ms21_2014_479_PFL_Fr1.mgf			24420	41930	19480	36210	42970
High	A	tVAAPSVFIFPPSDEQLk	9246	Unambiguous	Epididymis luminal protein 213 OS=Homo sapiens GN=HEL-213 PE=2 SV=1 - [V9HW34_HUMAN]|Protein IGKV3-11 OS=Homo sapiens GN=IGKV3-11 PE=4 SV=1 - [A0A087WZW8_HUMAN]	15	2	V9HW34;A0A087WZW8	N-Term(TMT6plex); K18(TMT6plex)	CID	1	0	1							No Quan Values	Not Used		0.002	0.0899	2766	2748	3.36	0	3112000	3	802.124	2404.36	0	1.38	1.28	6215	6216	MS2	0/0	0	0	2ms21_2014_479_PFL_Fr1.mgf
High	A	lEDMEQALSPSVFk	10314	Unambiguous	Isoform 2 of Plasma protease C1 inhibitor OS=Homo sapiens GN=SERPING1 - [IC1_HUMAN]	5	1	P05155-2	N-Term(TMT6plex); K14(TMT6plex)	CID	1	0	1	1079000	559500	336600	1508000	1015000	614000	Unique	Used	12306	0	0.00219	2898	2822	4.44	0	7582000	2	1026.56	2052.12	0	4.21	1.28	6217	6218	MS2	0/0	0	0	2ms21_2014_479_PFL_Fr1.mgf			1079000	559500	336600	1508000	1015000
High	A	lEDMEQALSPSVFk	10314	Unambiguous	Isoform 2 of Plasma protease C1 inhibitor OS=Homo sapiens GN=SERPING1 - [IC1_HUMAN]	5	1	P05155-2	N-Term(TMT6plex); K14(TMT6plex)	CID	1	0	1	156000	72600	93180	230600	157800	116900	Unique	Used	12311	0	0.0012	2746	2669	2.75	0	4038000	3	684.709	2052.11	0	1.56	1.28	6228	6229	MS2	0/0	0	0	2ms21_2014_479_PFL_Fr1.mgf			156000	72600	93180	230600	157800
High	A	gFQQLLQELNQPR	10366	Unambiguous	Plasma serine protease inhibitor OS=Homo sapiens GN=SERPINA5 PE=1 SV=3 - [IPSP_HUMAN]	2	1	P05154	N-Term(TMT6plex)	CID	1	0	1	868000	803200	522200	842100	341400	630700	Unique	Used	12320	0	0.000501	1951	1929	5.66	0	6508000	2	900.501	1800	0	-0.87	1.28	6248	6249	MS2	0/0	0	0	2ms21_2014_479_PFL_Fr1.mgf			868000	803200	522200	842100	341400
High	A	lDLTEkDYEILFk	10370	Unambiguous	cDNA FLJ76254, highly similar to Homo sapiens gamma-glutamyl hydrolase (GGH), mRNA OS=Homo sapiens PE=2 SV=1 - [A8K335_HUMAN]	2	1	A8K335	N-Term(TMT6plex); K6(TMT6plex); K13(TMT6plex)	CID	1	0	1	689300	704000	928100	615300	776700	634000	Unique	Used	12321	0.001	0.00796	2202	1895	3.53	1	6443000	3	772.124	2314.36	0	3.21	1.28	6250	6251	MS2	0/0	0	0	2ms21_2014_479_PFL_Fr1.mgf			689300	704000	928100	615300	776700
High	A	gTEAAGAmFLEAIPmSIPPEVk	10383	Unambiguous	Alpha-1-antitrypsin OS=Homo sapiens GN=SERPINA1 PE=1 SV=3 - [A1AT_HUMAN]	2	1	P01009	N-Term(TMT6plex); M8(Oxidation); M15(Oxidation); K22(TMT6plex)	CID	1	0	1	7349	40240	11740	2473	30800	22880	Unique	Used	12324	0.001	0.00338	3216	3103	3.14	0	290100	2	1375.23	2749.45	0	-2.11	1.28	6256	6257	MS2	0/0	0	0	2ms21_2014_479_PFL_Fr1.mgf			7349	40240	11740	2473	30800
High	A	dIFTGLIGPMk	7970	Unambiguous	cDNA FLJ76826, highly similar to Homo sapiens ceruloplasmin (ferroxidase) (CP), mRNA OS=Homo sapiens PE=2 SV=1 - [A8K5A4_HUMAN]	5	1	A8K5A4	N-Term(TMT6plex); K11(TMT6plex)	CID	1	0	1	1052000	3159000	1573000	585600	2056000	3535000	Unique	Used	12325	0	0.00221	1860	1840	3.9	0	16090000	2	825.49	1649.97	0	1.62	1.28	6259	6260	MS2	0/0	0	0	2ms21_2014_479_PFL_Fr1.mgf			1052000	3159000	1573000	585600	2056000
High	A	lLQDEFPGIPSPLDAAVEcHR	10393	Unambiguous	Hemopexin OS=Homo sapiens GN=HPX PE=1 SV=2 - [HEMO_HUMAN]	1	1	P02790	N-Term(TMT6plex); C19(Carbamidomethyl)	CID	1	0	1	48390	107900	63400	59120	51310	108700	Unique	Used	12326	0	7.02e-06	2384	2249	4.17	0	2288000	3	865.115	2593.33	0	1.24	1.28	6261	6262	MS2	0/0	0	0	2ms21_2014_479_PFL_Fr1.mgf			48390	107900	63400	59120	51310
High	A	tLDLGENQLETLPPDLLR	10421	Unambiguous	Leucine-rich alpha-2-glycoprotein OS=Homo sapiens GN=LRG1 PE=1 SV=2 - [A2GL_HUMAN]	1	1	P02750	N-Term(TMT6plex)	CID	1	0	1	55260	96490	78720	48960	54070	211000	Unique	Used	12333	0	0.000212	2771	2830	5.31	0	1947000	2	1133.63	2266.25	0	2.38	1.3	6276	6277	MS2	0/0	0	0	2ms21_2014_479_PFL_Fr1.mgf			55260	96490	78720	48960	54070
High	A	dSTYSLSSTLTLSk	4222	Unambiguous	Epididymis luminal protein 213 OS=Homo sapiens GN=HEL-213 PE=2 SV=1 - [V9HW34_HUMAN]|Protein IGKV3-11 OS=Homo sapiens GN=IGKV3-11 PE=4 SV=1 - [A0A087WZW8_HUMAN]	16	2	V9HW34;A0A087WZW8	N-Term(TMT6plex); K14(TMT6plex)	CID	1	0	1	10450	14620		13330	11130	12080	Not Unique	Not Used	12341	0.004	0.129	2411	2398	1.75	0	158500	3	654.366	1961.08	0	-0.42	1.3	6294	6295	MS2	0/0	0	0	2ms21_2014_479_PFL_Fr1.mgf			10450	14620		13330	11130
High	A	aLGITEIFIk	10465	Unambiguous		0	0		N-Term(TMT6plex); K10(TMT6plex)	CID	1	0	1	27190	21920	11920	29640	18790	17260	No Proteins	Not Used	12344	0.001	0.00533	1138	1054	3.92	0	562900	2	782	1562.99	0	0.23	1.3	6300	6301	MS2	0/0	0	0	2ms21_2014_479_PFL_Fr1.mgf			27190	21920	11920	29640	18790
High	A	dSTYSLSSTLTLSk	4222	Unambiguous	Epididymis luminal protein 213 OS=Homo sapiens GN=HEL-213 PE=2 SV=1 - [V9HW34_HUMAN]|Protein IGKV3-11 OS=Homo sapiens GN=IGKV3-11 PE=4 SV=1 - [A0A087WZW8_HUMAN]	16	2	V9HW34;A0A087WZW8	N-Term(TMT6plex); K14(TMT6plex)	CID	1	0	1	330400	261500	322300	259400	235400	335400	Not Unique	Not Used	12348	0	0.00277	2541	2524	4.89	0	3064000	2	981.049	1961.09	0	3.39	1.3	6309	6310	MS2	0/0	0	0	2ms21_2014_479_PFL_Fr1.mgf			330400	261500	322300	259400	235400
High	A	gQSEDPGSLLSLFR	10498	Unambiguous		0	0		N-Term(TMT6plex)	CID	1	0	1	661500	318100	367100	376000	299800	407500	No Proteins	Not Used	12352	0.001	0.00571	1603	1615	2.8	0	4267000	2	867.964	1734.92	0	-1.22	1.3	6318	6319	MS2	0/0	0	0	2ms21_2014_479_PFL_Fr1.mgf			661500	318100	367100	376000	299800
High	A	gYVVWQEVFDNk	10502	Unambiguous	cDNA FLJ50884, highly similar to Beta-hexosaminidase alpha chain (EC 3.2.1.52) OS=Homo sapiens PE=2 SV=1 - [B4DVL8_HUMAN]	7	1	B4DVL8	N-Term(TMT6plex); K12(TMT6plex)	CID	1	0	1	1367000	1032000	1418000	1553000	947500	1163000	Unique	Used	12353	0	0.00172	2015	2038	3.53	0	10180000	2	971.528	1942.05	0	0.13	1.3	6320	6321	MS2	0/0	0	0	2ms21_2014_479_PFL_Fr1.mgf			1367000	1032000	1418000	1553000	947500
High	A	vEGcFNQLLYDIR	10513	Unambiguous		0	0		N-Term(TMT6plex); C4(Carbamidomethyl)	CID	1	0	1	561300	623600	797800	657500	779300	598200	No Proteins	Not Used	12356	0	0.000299	1384	1292	4.56	0	6395000	2	928.482	1855.96	0	-0.72	1.3	6327	6328	MS2	0/0	0	0	2ms21_2014_479_PFL_Fr1.mgf			561300	623600	797800	657500	779300
High	A	vTIPTDLIASSGDIIk	10531	Unambiguous	Dystroglycan 1 (Dystrophin-associated glycoprotein 1), isoform CRA_a OS=Homo sapiens GN=DAG1 PE=4 SV=1 - [A0A024R2W4_HUMAN]	2	1	A0A024R2W4	N-Term(TMT6plex); K16(TMT6plex)	CID	1	0	1							No Quan Values	Not Used		0.001	0.0266	2114	2013	3.14	0	102500	3	701.089	2101.25	0	0.75	1.3	6340	6341	MS2	0/0	0	0	2ms21_2014_479_PFL_Fr1.mgf
High	A	sLEYLDLSFNQIAR	10544	Unambiguous		0	0		N-Term(TMT6plex)	CID	1	0	1	689200	510000	415500	451600	480400	484700	No Proteins	Not Used	12366	0	0.00216	1960	1996	4.06	0	5161000	2	949.515	1898.02	0	-0.07	1.3	6349	6350	MS2	0/0	0	0	2ms21_2014_479_PFL_Fr1.mgf			689200	510000	415500	451600	480400
High	A	vDLITFDTPFAGR	10548	Unambiguous	Biotinidase (Fragment) OS=Homo sapiens GN=BTD PE=4 SV=1 - [C9JSN9_HUMAN]	5	1	C9JSN9	N-Term(TMT6plex)	CID	1	0	1	417600	346400	330400	424700	351400	513400	Unique	Used	12367	0.002	0.0683	1658	1728	3.17	0	3756000	2	840.959	1680.91	0	-3.25	1.3	6351	6352	MS2	0/0	0	0	2ms21_2014_479_PFL_Fr1.mgf			417600	346400	330400	424700	351400
High	A	sLEYLDLSFNQIAR	10544	Unambiguous		0	0		N-Term(TMT6plex)	CID	1	0	1	10270	10410	8587	9672	11320	12940	No Proteins	Not Used	12368	0	0.000638	1920	1973	3.05	0	193300	3	633.345	1898.02	0	-1.43	1.3	6353	6354	MS2	0/0	0	0	2ms21_2014_479_PFL_Fr1.mgf			10270	10410	8587	9672	11320
High	A	lTVYTTLIDVTk	10566	Unambiguous	Acid ceramidase OS=Homo sapiens GN=ASAH1 PE=1 SV=1 - [E7EMM4_HUMAN]	8	1	E7EMM4	N-Term(TMT6plex); K12(TMT6plex)	CID	1	0	1	167300	272600	375900	214100	217100	300700	Unique	Used	12372	0.001	0.00612	1414	1251	5.06	0	3069000	2	913.055	1825.1	0	-3.42	1.3	6362	6363	MS2	0/0	0	0	2ms21_2014_479_PFL_Fr1.mgf			167300	272600	375900	214100	217100
High	A	eTFLDPFVLR	10570	Unambiguous		0	0		N-Term(TMT6plex)	CID	1	0	1	325900	228300	216700	166700	180700	316300	No Proteins	Not Used	12373	0.002	0.0386	1483	1469	1.84	0	2457000	2	733.416	1465.83	0	0.22	1.3	6364	6365	MS2	0/0	0	0	2ms21_2014_479_PFL_Fr1.mgf			325900	228300	216700	166700	180700
High	A	lLPVQENFLLk	10576	Unambiguous		0	0		N-Term(TMT6plex); K11(TMT6plex)	CID	1	0	1		13470				19650	No Proteins	Not Used	12375	0.001	0.00339	1129	1042	4.04	0	1197000	2	886.558	1772.11	0	0.42	1.3	6369	6370	MS2	0/0	0	0	2ms21_2014_479_PFL_Fr1.mgf				13470
Middle	A	lTVYTTLIDVTk	10566	Unambiguous	Acid ceramidase OS=Homo sapiens GN=ASAH1 PE=1 SV=1 - [E7EMM4_HUMAN]	8	1	E7EMM4	N-Term(TMT6plex); K12(TMT6plex)	CID	1	0	1	67620	65970	54980	78690	48650	79400	Unique	Used	12377	0.026	0.42	1403	1254	1.48	0	584500	3	609.04	1825.11	0	-1.83	1.32	6373	6374	MS2	0/0	0	0	2ms21_2014_479_PFL_Fr1.mgf			67620	65970	54980	78690	48650
High	A	dSTLIMQLLR	10587	Unambiguous	cDNA, FLJ79100, highly similar to 14-3-3 protein epsilon (14-3-3E) OS=Homo sapiens PE=2 SV=1 - [B7ZA86_HUMAN]	6	1	B7ZA86	N-Term(TMT6plex)	CID	1	0	1	245800	141700	122600	306100	155900	142700	Unique	Used	12378	0.002	0.0349	1878	1858	1.7	0	1485000	2	709.915	1418.82	0	-0.53	1.32	6375	6376	MS2	0/0	0	0	2ms21_2014_479_PFL_Fr1.mgf			245800	141700	122600	306100	155900
High	A	aVLDVFEEGTEASAATAVk	10100	Unambiguous	Alpha-1-antichymotrypsin OS=Homo sapiens GN=SERPINA3 PE=1 SV=2 - [AACT_HUMAN]	3	1	P01011	N-Term(TMT6plex); K19(TMT6plex)	CID	1	0	1	57700	48870	42010	20770	21460	42130	Unique	Used	12391	0.001	0.00668	2942	2830	3.09	0	1253000	2	1183.63	2366.25	-0.02	-16.07	1.32	6404	6405	MS2	0/0	0	0	2ms21_2014_479_PFL_Fr1.mgf			57700	48870	42010	20770	21460
High	A	wLGVLLPk	10689	Unambiguous	Isoform 3 of Beta-galactosidase OS=Homo sapiens GN=GLB1 - [BGAL_HUMAN]	5	1	P16278-3	N-Term(TMT6plex); K8(TMT6plex)	CID	1	0	1	193000	143000	129700	205500	152200	173100	Unique	Used	12403	0.006	0.175	365	369	1.4	0	1145000	2	692.462	1383.92	0	2.58	1.32	6430	6431	MS2	0/0	0	0	2ms21_2014_479_PFL_Fr1.mgf			193000	143000	129700	205500	152200
High	A	sLYPLTFIQVk	10700	Unambiguous	Isoform 3 of Beta-galactosidase OS=Homo sapiens GN=GLB1 - [BGAL_HUMAN]	8	1	P16278-3	N-Term(TMT6plex); K11(TMT6plex)	CID	1	0	1	38910	29600	26720	52210	24990	35230	Unique	Used	12405	0.001	0.00374	1141	1176	3.47	0	1550000	2	884.042	1767.08	0	-2.92	1.32	6435	6436	MS2	0/0	0	0	2ms21_2014_479_PFL_Fr1.mgf			38910	29600	26720	52210	24990
High	A	vLDIIATINk	10718	Unambiguous	Beta-hexosaminidase subunit beta OS=Homo sapiens GN=HEL-248 PE=1 SV=1 - [Q5URX0_HUMAN]	2	1	Q5URX0	N-Term(TMT6plex); K10(TMT6plex)	CID	1	0	1	66930	48060	54770	63380	46490	53110	Unique	Used	12411	0.002	0.0328	977	850	3.11	0	955500	2	779.501	1558	0	-1.54	1.32	6448	6449	MS2	0/0	0	0	2ms21_2014_479_PFL_Fr1.mgf			66930	48060	54770	63380	46490
High	A	dGWQLQVQGGVAQLVIk	10728	Unambiguous		0	0		N-Term(TMT6plex); K17(TMT6plex)	CID	1	0	1	64100	33920	30060	46320	30050	44940	No Proteins	Not Used	12412	0	0.000118	1866	1797	4.85	0	1465000	3	766.453	2297.34	0	2.3	1.32	6450	6451	MS2	0/0	0	0	2ms21_2014_479_PFL_Fr1.mgf			64100	33920	30060	46320	30050
High	A	cEGPIPDVTFELLR	10756	Unambiguous	Alpha-1B-glycoprotein OS=Homo sapiens GN=A1BG PE=1 SV=4 - [A1BG_HUMAN]	1	1	P04217	N-Term(TMT6plex); C1(Carbamidomethyl)	CID	1	0	1	889600	2119000	824100	250400	1797000	2399000	Unique	Used	12417	0	0.00254	1764	1696	3.43	0	12780000	2	937.997	1874.99	0	-0.51	1.32	6462	6463	MS2	0/0	0	0	2ms21_2014_479_PFL_Fr1.mgf			889600	2119000	824100	250400	1797000
High	A	lLDNWDSVTSTFSk	10760	Unambiguous	Apolipoprotein A-I OS=Homo sapiens GN=APOA1 PE=1 SV=1 - [APOA1_HUMAN]	2	1	P02647	N-Term(TMT6plex); K14(TMT6plex)	CID	1	0	1	281500	1004000	417900	257600	1091000	1242000	Unique	Used	12418	0	0.000219	2325	2366	4.45	0	6370000	2	1036.06	2071.11	0	1.24	1.32	6464	6465	MS2	0/0	0	0	2ms21_2014_479_PFL_Fr1.mgf			281500	1004000	417900	257600	1091000
Middle	A	nALALFVLPk	10768	Unambiguous	Thyroxine-binding globulin OS=Homo sapiens GN=SERPINA7 PE=1 SV=2 - [THBG_HUMAN]	1	1	P05543	N-Term(TMT6plex); K10(TMT6plex)	CID	1	0	1	19550	21110	24030	19070	24190	20690	Unique	Used	12419	0.021	0.386	794	735	1.2	0	203800	3	515.339	1544	0	3.08	1.32	6466	6467	MS2	0/0	0	0	2ms21_2014_479_PFL_Fr1.mgf			19550	21110	24030	19070	24190
High	A	sIPTcTDFEVIQFPLR	10781	Unambiguous		0	0		N-Term(TMT6plex); C5(Carbamidomethyl)	CID	1	0	1	34630	32070	24930	29660	25170	41640	No Proteins	Not Used	12423	0	0.00153	2460	2366	5.3	0	882700	2	1076.57	2152.13	0	0.49	1.33	6475	6476	MS2	0/0	0	0	2ms21_2014_479_PFL_Fr1.mgf			34630	32070	24930	29660	25170
High	A	lAYQGQDTPEVLMDIGLR	10818	Unambiguous		0	0		N-Term(TMT6plex)	CID	1	0	1	1327000	1162000	756300	1931000	1124000	1053000	No Proteins	Not Used	12432	0	0.00192	2421	2385	4.58	0	13690000	2	1124.6	2248.19	0	2.51	1.33	6495	6496	MS2	0/0	0	0	2ms21_2014_479_PFL_Fr1.mgf			1327000	1162000	756300	1931000	1124000
High	A	eLSEALGQIFDSQR	10823	Unambiguous	cDNA FLJ53478, highly similar to Galectin-3-binding protein OS=Homo sapiens PE=2 SV=1 - [B4DVE1_HUMAN]	2	1	B4DVE1	N-Term(TMT6plex)	CID	1	0	1	827400	585400	481200	409700	789400	585300	Unique	Used	12433	0	0.000332	1723	1664	5.1	0	6589000	2	911.48	1821.95	0	-1.05	1.33	6497	6498	MS2	0/0	0	0	2ms21_2014_479_PFL_Fr1.mgf			827400	585400	481200	409700	789400
High	A	eLSELSLLSLYGIHk	10834	Unambiguous	Prostatic acid phosphatase OS=Homo sapiens GN=ACPP PE=1 SV=3 - [PPAP_HUMAN]	3	1	P15309	N-Term(TMT6plex); K15(TMT6plex)	CID	1	0	1	309000	114300	81780	120000	128100	104200	Unique	Used	12436	0	6.32e-07	2290	2283	4.81	0	2622000	3	720.76	2160.26	0	-1.55	1.33	6503	6504	MS2	0/0	0	0	2ms21_2014_479_PFL_Fr1.mgf			309000	114300	81780	120000	128100
High	A	aYVAFPDFFR	10836	Unambiguous	Maltase-glucoamylase, intestinal OS=Homo sapiens GN=MGAM PE=3 SV=2 - [E7ER45_HUMAN]	3	1	E7ER45	N-Term(TMT6plex)	CID	1	0	1	1435000	1155000	2163000	1360000	1392000	1315000	Unique	Used	12437	0.001	0.0124	1069	1057	2.94	0	15090000	2	731.391	1461.77	0	0.85	1.33	6506	6507	MS2	0/0	0	0	2ms21_2014_479_PFL_Fr1.mgf			1435000	1155000	2163000	1360000	1392000
High	A	mTVSTLVLGEGATEAEISMTSTR	8597	Unambiguous	Protein AMBP OS=Homo sapiens GN=AMBP PE=1 SV=1 - [AMBP_HUMAN]	1	1	P02760	N-Term(TMT6plex)	CID	1	0	1	59110	59170	78290	82220	68810	81710	Unique	Used	12438	0	0.000118	2477	2530	3.57	0	1958000	3	871.782	2613.33	0	0.2	1.33	6508	6509	MS2	0/0	0	0	2ms21_2014_479_PFL_Fr1.mgf			59110	59170	78290	82220	68810
High	A	tEAVASSLYDILAR	10847	Unambiguous	Isoform 3 of Beta-galactosidase OS=Homo sapiens GN=GLB1 - [BGAL_HUMAN]	8	1	P16278-3	N-Term(TMT6plex)	CID	1	0	1	627700	629000	858200	690200	804200	873900	Unique	Used	12440	0	0.00032	1820	1763	4.7	0	6750000	2	869.483	1737.96	0	0.59	1.33	6512	6513	MS2	0/0	0	0	2ms21_2014_479_PFL_Fr1.mgf			627700	629000	858200	690200	804200
High	A	yDVDTQMWTILk	10864	Unambiguous	cDNA FLJ58441, highly similar to Attractin OS=Homo sapiens PE=2 SV=1 - [B4DZ36_HUMAN]	4	1	B4DZ36	N-Term(TMT6plex); K12(TMT6plex)	CID	1	0	1	810900	619400	668100	1081000	694500	840200	Unique	Used	12444	0	0.000808	2100	2102	5.01	0	6363000	2	986.038	1971.07	0	1.73	1.33	6521	6522	MS2	0/0	0	0	2ms21_2014_479_PFL_Fr1.mgf			810900	619400	668100	1081000	694500
High	A	lASDGATWADIFk	10868	Unambiguous	Putative phospholipase B-like 2 OS=Homo sapiens GN=PLBD2 PE=1 SV=2 - [PLBL2_HUMAN]	1	1	Q8NHP8	N-Term(TMT6plex); K13(TMT6plex)	CID	1	0	1	110800	105800	102300	102400	96210	144300	Unique	Used	12445	0	0.000225	2083	2027	5.26	0	2145000	2	927.012	1853.02	0	-1.95	1.33	6523	6524	MS2	0/0	0	0	2ms21_2014_479_PFL_Fr1.mgf			110800	105800	102300	102400	96210
High	A	iYTSPTWSAFVTDSSWSAR	10878	Unambiguous	cDNA FLJ53478, highly similar to Galectin-3-binding protein OS=Homo sapiens PE=2 SV=1 - [B4DVE1_HUMAN]	2	1	B4DVE1	N-Term(TMT6plex)	CID	1	0	1	230500	217700	162400	143100	256800	171800	Unique	Used	12449	0	0.000849	1302	1264	4.9	0	2549000	2	1196.09	2391.18	0	-0.91	1.33	6532	6533	MS2	0/0	0	0	2ms21_2014_479_PFL_Fr1.mgf			230500	217700	162400	143100	256800
High	A	tSIYPFLDFmPSPQVVR	10884	Unambiguous	Biotinidase (Fragment) OS=Homo sapiens GN=BTD PE=4 SV=1 - [C9JSN9_HUMAN]	5	1	C9JSN9	N-Term(TMT6plex); M10(Oxidation)	CID	1	0	1	178800	242500	372600	181500	279800	283700	Unique	Used	12451	0	0.00199	2305	2328	3.14	0	3222000	2	1121.59	2242.18	0	1.41	1.33	6536	6537	MS2	0/0	0	0	2ms21_2014_479_PFL_Fr1.mgf			178800	242500	372600	181500	279800
High	A	nTFAEVTGLSPGVTYYFk	10888	Unambiguous	Putative uncharacterized protein DKFZp686O12165 (Fragment) OS=Homo sapiens GN=DKFZp686O12165 PE=1 SV=1 - [Q6MZM7_HUMAN]	3	1	Q6MZM7	N-Term(TMT6plex); K18(TMT6plex)	CID	1	0	1	78260	68830	60470	115600	81500	99100	Unique	Used	12452	0	5.4e-06	3025	3198	5.31	0	2399000	3	818.111	2452.32	0	0.38	1.33	6539	6540	MS2	0/0	0	0	2ms21_2014_479_PFL_Fr1.mgf			78260	68830	60470	115600	81500
High	A	fPLSFASAEYQEALSR	10892	Unambiguous		0	0		N-Term(TMT6plex)	CID	1	0	1	483900	391100	648300	425000	486800	468000	No Proteins	Not Used	12454	0	0.000128	1579	1588	4.95	0	5815000	2	1023.03	2045.05	0	-0.69	1.33	6543	6544	MS2	0/0	0	0	2ms21_2014_479_PFL_Fr1.mgf			483900	391100	648300	425000	486800
High	A	aDEDPIMGFHQMFLLk	10898	Unambiguous	Nuclear transport factor 2 OS=Homo sapiens GN=NUTF2 PE=1 SV=1 - [NTF2_HUMAN]	1	1	P61970	N-Term(TMT6plex); K16(TMT6plex)	CID	1	0	1	837400	309000	246600	403500	455100	524700	Unique	Used	12456	0	5.09e-05	2607	2718	4.23	0	8740000	3	784.085	2350.24	0	2.97	1.33	6547	6548	MS2	0/0	0	0	2ms21_2014_479_PFL_Fr1.mgf			837400	309000	246600	403500	455100
High	A	tFVEYLNAVTESEk	10900	Unambiguous		0	0		N-Term(TMT6plex); K14(TMT6plex)	CID	1	0	1	2439000	1778000	1909000	2760000	1224000	1920000	No Proteins	Not Used	12458	0	0.000154	2326	2490	6.22	0	16960000	2	1044.57	2088.13	0	0.91	1.33	6552	6553	MS2	0/0	0	0	2ms21_2014_479_PFL_Fr1.mgf			2439000	1778000	1909000	2760000	1224000
High	A	iSVNNVLPVFDNLmQQk	10908	Unambiguous	Cathepsin D OS=Homo sapiens GN=CTSD PE=1 SV=1 - [CATD_HUMAN]	1	1	P07339	N-Term(TMT6plex); M14(Oxidation); K17(TMT6plex)	CID	1	0	1	146200	195900	451200	244600	196500	247600	Unique	Used	12459	0	8.39e-05	3122	3005	2.96	0	2439000	3	811.792	2433.36	0	1.84	1.33	6554	6555	MS2	0/0	0	0	2ms21_2014_479_PFL_Fr1.mgf			146200	195900	451200	244600	196500
High	A	vVLAYEPVWAIGTGk	10914	Unambiguous		0	0		N-Term(TMT6plex); K15(TMT6plex)	CID	1	0	1	119800	49630	42640	45530	88580	49160	No Proteins	Not Used	12461	0	0.00013	2547	2530	4.21	0	1348000	2	1031.11	2061.22	0	0.92	1.33	6558	6559	MS2	0/0	0	0	2ms21_2014_479_PFL_Fr1.mgf			119800	49630	42640	45530	88580
High	A	dLYSGLIGPLIVcR	10929	Unambiguous	cDNA FLJ76826, highly similar to Homo sapiens ceruloplasmin (ferroxidase) (CP), mRNA OS=Homo sapiens PE=2 SV=1 - [A8K5A4_HUMAN]	5	1	A8K5A4	N-Term(TMT6plex); C13(Carbamidomethyl)	CID	1	0	1	45310	81410	39840		78060	66310	Unique	Used	12464	0	0.000269	2641	2598	3.41	0	2414000	3	602.344	1805.02	0	-1.36	1.33	6565	6566	MS2	0/0	0	0	2ms21_2014_479_PFL_Fr1.mgf			45310	81410	39840		78060
High	A	iQTVWVLDSWSR	10953	Unambiguous		0	0		N-Term(TMT6plex)	CID	1	0	1	130600	180400	116000	165400	139100	166000	No Proteins	Not Used	12471	0.004	0.123	2132	2098	3.34	0	1913000	2	859.977	1718.95	0	2.85	1.33	6580	6581	MS2	0/0	0	0	2ms21_2014_479_PFL_Fr1.mgf			130600	180400	116000	165400	139100
High	A	dIASGLIGPLIIck	10959	Unambiguous	cDNA FLJ76826, highly similar to Homo sapiens ceruloplasmin (ferroxidase) (CP), mRNA OS=Homo sapiens PE=2 SV=1 - [A8K5A4_HUMAN]	5	1	A8K5A4	N-Term(TMT6plex); C13(Carbamidomethyl); K14(TMT6plex)	CID	1	0	1	168700	437700	365200	132500	365900	610000	Unique	Used	12472	0	0.000311	1518	1545	3.46	0	6780000	3	643.394	1928.17	0	0.48	1.35	6583	6584	MS2	0/0	0	0	2ms21_2014_479_PFL_Fr1.mgf			168700	437700	365200	132500	365900
High	A	fFTINPEDGFIk	10961	Unambiguous	Isoform 2 of Cadherin-11 OS=Homo sapiens GN=CDH11 - [CAD11_HUMAN]	5	1	P55287-2	N-Term(TMT6plex); K12(TMT6plex)	CID	1	0	1	2651000	747800	644800	1684000	1091000	1423000	Unique	Used	12473	0.001	0.00908	2041	2051	3.77	0	11540000	2	943.527	1886.05	0	0.04	1.35	6585	6586	MS2	0/0	0	0	2ms21_2014_479_PFL_Fr1.mgf			2651000	747800	644800	1684000	1091000
Middle	A	fFTINPEDGFIk	10961	Unambiguous	Isoform 2 of Cadherin-11 OS=Homo sapiens GN=CDH11 - [CAD11_HUMAN]	5	1	P55287-2	N-Term(TMT6plex); K12(TMT6plex)	CID	1	0	1	9735		10320	20940	9974	12960	Unique	Used	12476	0.028	0.44	2060	2064	1.33	0	148800	3	629.355	1886.05	0	1.59	1.35	6591	6592	MS2	0/0	0	0	2ms21_2014_479_PFL_Fr1.mgf			9735		10320	20940	9974
High	A	gWVDLFVPk	10979	Unambiguous	Thyroxine-binding globulin OS=Homo sapiens GN=SERPINA7 PE=1 SV=2 - [THBG_HUMAN]	1	1	P05543	N-Term(TMT6plex); K9(TMT6plex)	CID	1	0	1	2733000	4150000	3801000	3212000	4306000	6327000	Unique	Used	12477	0.002	0.036	1942	1867	2.49	0	34110000	2	759.959	1518.91	0	0.87	1.35	6594	6595	MS2	0/0	0	0	2ms21_2014_479_PFL_Fr1.mgf			2733000	4150000	3801000	3212000	4306000
High	A	dLYSGLIGPLIVcR	10929	Unambiguous	cDNA FLJ76826, highly similar to Homo sapiens ceruloplasmin (ferroxidase) (CP), mRNA OS=Homo sapiens PE=2 SV=1 - [A8K5A4_HUMAN]	5	1	A8K5A4	N-Term(TMT6plex); C13(Carbamidomethyl)	CID	1	0	1	497100	1525000	816900	320400	919500	1824000	Unique	Used	12492	0	9.98e-05	2634	2601	4.78	0	8676000	2	903.014	1805.02	0	0.55	1.35	6627	6628	MS2	0/0	0	0	2ms21_2014_479_PFL_Fr1.mgf			497100	1525000	816900	320400	919500
Middle	A	dGGGGDNTTEIFRPGGGNMk	5045	Unambiguous		0	0		N-Term(TMT6plex); K20(TMT6plex)	CID	1	0	1	177900	571300	333800	200000	215500	461700	No Proteins	Not Used	12515	0.034	0.507	1513	1523	1.66	0	3616000	2	1219.61	2438.21	0	0.04	1.35	6680	6681	MS2	0/0	0	0	2ms21_2014_479_PFL_Fr1.mgf			177900	571300	333800	200000	215500
High	A	eQLGEFYEALDcLR	11143	Unambiguous	Alpha-1-acid glycoprotein 1 OS=Homo sapiens GN=ORM1 PE=1 SV=1 - [A1AG1_HUMAN]	1	1	P02763	N-Term(TMT6plex); C12(Carbamidomethyl)	CID	1	0	1		104600	40100	39810		118800	No Quan Values	Not Used	12517	0.001	0.0102	860	815	3.41	0	15780000	3	657.995	1971.97	0	0.74	1.37	6684	6685	MS2	0/0	0	0	2ms21_2014_479_PFL_Fr1.mgf				104600	40100	39810
High	A	vWLEVEPVGMLk	11160	Unambiguous	Isoform 2 of Cell surface glycoprotein MUC18 OS=Homo sapiens GN=MCAM - [MUC18_HUMAN]	5	1	P43121-2	N-Term(TMT6plex); K12(TMT6plex)	CID	1	0	1	47530	29020	19120	30170	22150	36200	Unique	Used	12522	0	0.0014	2394	2238	4.53	0	811100	2	929.546	1858.09	0	-3.14	1.37	6695	6696	MS2	0/0	0	0	2ms21_2014_479_PFL_Fr1.mgf			47530	29020	19120	30170	22150
High	A	vIFGLFGk	11170	Unambiguous		0	0		N-Term(TMT6plex); K8(TMT6plex)	CID	1	0	1	17100			28960			No Proteins	Not Used	12525	0.001	0.0209	530	516	3	0	172100	2	669.931	1338.85	0	-0.45	1.37	6702	6703	MS2	0/0	0	0	2ms21_2014_479_PFL_Fr1.mgf			17100			28960
High	A	tAGWNIPMGLLYNk	8353	Unambiguous	Transferrin variant (Fragment) OS=Homo sapiens PE=2 SV=1 - [Q53H26_HUMAN]	6	1	Q53H26	N-Term(TMT6plex); K14(TMT6plex)	CID	1	0	1		1883000	605800	39250	1588000	1504000	No Quan Values	Not Used	12527	0	4.18e-05	2805	2724	4.11	0	16470000	3	679.385	2036.14	0	-0.5	1.37	6707	6708	MS2	0/0	0	0	2ms21_2014_479_PFL_Fr1.mgf				1883000	605800	39250	1588000
Middle	A	vNAIPFTYEQLDVLk	11268	Unambiguous		0	0		N-Term(TMT6plex); K15(TMT6plex)	CID	1	0	1	6651	5691	7269	6257	5679	7235	No Proteins	Not Used	12549	0.029	0.459	2334	2252	2.78	0	103900	2	1104.63	2208.26	0	-3.31	1.37	6757	6758	MS2	0/0	0	0	2ms21_2014_479_PFL_Fr1.mgf			6651	5691	7269	6257	5679
High	A	tDcPGDALFDLLR	11342	Unambiguous		0	0		N-Term(TMT6plex); C3(Carbamidomethyl)	CID	1	0	1	347300	249800	310300	315300	298700	155500	No Proteins	Not Used	12569	0	0.00123	1070	921	3.54	0	2791000	2	861.44	1721.87	0	-0.48	1.38	6802	6803	MS2	0/0	0	0	2ms21_2014_479_PFL_Fr1.mgf			347300	249800	310300	315300	298700
Middle	A	wFYIASAFR	11357	Unambiguous	Alpha-1-acid glycoprotein 1 OS=Homo sapiens GN=ORM1 PE=1 SV=1 - [A1AG1_HUMAN]|Alpha-1-acid glycoprotein 2 OS=Homo sapiens GN=ORM2 PE=1 SV=2 - [A1AG2_HUMAN]	2	2	P02763;P19652	N-Term(TMT6plex)	CID	1	0	1		3469		4228			No Quan Values	Not Used	12573	0.045	0.577	1391	1334	0.86	0	87120	3	463.924	1389.76	0	3.89	1.38	6811	6812	MS2	0/0	0	0	2ms21_2014_479_PFL_Fr1.mgf				3469		4228
High	A	aYAANVYTSVVEELAR	11359	Unambiguous		0	0		N-Term(TMT6plex)	CID	1	0	1	12070	9478	10360	9005	7740	10850	No Proteins	Not Used	12574	0	7.46e-05	1913	1872	3.32	0	493200	2	993.03	1985.05	0	-0.74	1.38	6813	6814	MS2	0/0	0	0	2ms21_2014_479_PFL_Fr1.mgf			12070	9478	10360	9005	7740
High	A	eQLGEFYEALDcLR	11143	Unambiguous	Alpha-1-acid glycoprotein 1 OS=Homo sapiens GN=ORM1 PE=1 SV=1 - [A1AG1_HUMAN]	1	1	P02763	N-Term(TMT6plex); C12(Carbamidomethyl)	CID	1	0	1	2021000	14700000	9425000	2491000	8282000	15410000	Unique	Used	12575	0	0.000286	868	827	4.91	0	90610000	2	986.489	1971.97	0	1.31	1.38	6816	6817	MS2	0/0	0	0	2ms21_2014_479_PFL_Fr1.mgf			2021000	14700000	9425000	2491000	8282000
High	A	eQLGEFYEALDcLR	11143	Unambiguous	Alpha-1-acid glycoprotein 1 OS=Homo sapiens GN=ORM1 PE=1 SV=1 - [A1AG1_HUMAN]	1	1	P02763	N-Term(TMT6plex); C12(Carbamidomethyl)	CID	1	0	1	152600	616600	311700	152300	321000	545700	Unique	Used	12576	0	0.000212	867	823	3.01	0	46290000	3	657.995	1971.97	0	1.11	1.38	6818	6819	MS2	0/0	0	0	2ms21_2014_479_PFL_Fr1.mgf			152600	616600	311700	152300	321000
High	A	tAGWNIPMGLLYNk	8353	Unambiguous	Transferrin variant (Fragment) OS=Homo sapiens PE=2 SV=1 - [Q53H26_HUMAN]	6	1	Q53H26	N-Term(TMT6plex); K14(TMT6plex)	CID	1	0	1	18040	141200	67860	16250	124800	136000	Unique	Used	12577	0	0.00159	2777	2691	4.12	0	1420000	2	1018.58	2036.14	0	1.87	1.38	6820	6821	MS2	0/0	0	0	2ms21_2014_479_PFL_Fr1.mgf			18040	141200	67860	16250	124800
High	A	eIPAWVPFDPAAQITk	11377	Unambiguous	Zinc-alpha-2-glycoprotein OS=Homo sapiens GN=AZGP1 PE=1 SV=2 - [ZA2G_HUMAN]	1	1	P25311	N-Term(TMT6plex); K16(TMT6plex)	CID	1	0	1	2328000	6841000	5880000	4259000	4615000	8840000	Unique	Used	12579	0	1.01e-05	2440	2541	4.96	0	60230000	2	1121.14	2241.27	0	1.81	1.38	6825	6826	MS2	0/0	0	0	2ms21_2014_479_PFL_Fr1.mgf			2328000	6841000	5880000	4259000	4615000
High	A	eIPAWVPFDPAAQITk	11377	Unambiguous	Zinc-alpha-2-glycoprotein OS=Homo sapiens GN=AZGP1 PE=1 SV=2 - [ZA2G_HUMAN]	1	1	P25311	N-Term(TMT6plex); K16(TMT6plex)	CID	1	0	1	628000	1714000	1479000	1237000	1243000	2241000	Unique	Used	12580	0.001	0.0193	2421	2513	3.75	0	17870000	2	1121.14	2241.27	0	2.57	1.38	6827	6828	MS2	0/0	0	0	2ms21_2014_479_PFL_Fr1.mgf			628000	1714000	1479000	1237000	1243000
High	A	eIPAWVPFDPAAQITk	11377	Unambiguous	Zinc-alpha-2-glycoprotein OS=Homo sapiens GN=AZGP1 PE=1 SV=2 - [ZA2G_HUMAN]	1	1	P25311	N-Term(TMT6plex); K16(TMT6plex)	CID	1	0	1	1254000	3425000	3273000	2551000	2947000	4849000	Unique	Used	12584	0	1.32e-07	2419	2522	4.24	0	43900000	3	747.762	2241.27	0	1.37	1.38	6836	6837	MS2	0/0	0	0	2ms21_2014_479_PFL_Fr1.mgf			1254000	3425000	3273000	2551000	2947000
High	A	wFYIASAFR	11357	Unambiguous	Alpha-1-acid glycoprotein 1 OS=Homo sapiens GN=ORM1 PE=1 SV=1 - [A1AG1_HUMAN]|Alpha-1-acid glycoprotein 2 OS=Homo sapiens GN=ORM2 PE=1 SV=2 - [A1AG2_HUMAN]	2	2	P02763;P19652	N-Term(TMT6plex)	CID	1	0	1	1504000	11870000	6704000	1825000	6604000	16740000	Not Unique	Not Used	12586	0.001	0.0257	1363	1344	3.06	0	67300000	2	695.38	1389.75	0	0.56	1.38	6841	6842	MS2	0/0	0	0	2ms21_2014_479_PFL_Fr1.mgf			1504000	11870000	6704000	1825000	6604000
High	A	wFYIASAFR	11357	Unambiguous	Alpha-1-acid glycoprotein 1 OS=Homo sapiens GN=ORM1 PE=1 SV=1 - [A1AG1_HUMAN]|Alpha-1-acid glycoprotein 2 OS=Homo sapiens GN=ORM2 PE=1 SV=2 - [A1AG2_HUMAN]	2	2	P02763;P19652	N-Term(TMT6plex)	CID	1	0	1	423100	3365000	1952000	617200	2036000	4948000	Not Unique	Not Used	12587	0.001	0.0096	1363	1344	2.43	0	67300000	2	695.38	1389.75	0	0.56	1.38	6843	6844	MS2	0/0	0	0	2ms21_2014_479_PFL_Fr1.mgf			423100	3365000	1952000	617200	2036000
High	A	iFWPcGLTIDYPNR	11416	Unambiguous	Low-density lipoprotein receptor-related protein 2 OS=Homo sapiens GN=LRP2 PE=1 SV=3 - [LRP2_HUMAN]	3	1	P98164	N-Term(TMT6plex); C5(Carbamidomethyl)	CID	1	0	1	8286	12730	14880	9143	10550	18340	Unique	Used	12589	0.005	0.136	1400	1325	2.74	0	483400	2	991.01	1981.01	0	-3.87	1.38	6847	6848	MS2	0/0	0	0	2ms21_2014_479_PFL_Fr1.mgf			8286	12730	14880	9143	10550
High	A	iTLLSALVETR	11433	Unambiguous	Alpha-1-antichymotrypsin OS=Homo sapiens GN=SERPINA3 PE=1 SV=2 - [AACT_HUMAN]	3	1	P01011	N-Term(TMT6plex)	CID	1	0	1	13110	23600	25710	19970	26970	37330	Unique	Used	12593	0.001	0.0172	1484	1530	3.62	0	276600	2	722.952	1444.9	0	2.38	1.38	6856	6857	MS2	0/0	0	0	2ms21_2014_479_PFL_Fr1.mgf			13110	23600	25710	19970	26970
High	A	dIASGLIGPLIIck	10959	Unambiguous	cDNA FLJ76826, highly similar to Homo sapiens ceruloplasmin (ferroxidase) (CP), mRNA OS=Homo sapiens PE=2 SV=1 - [A8K5A4_HUMAN]	5	1	A8K5A4	N-Term(TMT6plex); C13(Carbamidomethyl); K14(TMT6plex)	CID	1	0	1	32230	46100	37150	27650	33070	50360	Unique	Used	12594	0.001	0.00495	1687	1699	4.28	0	906800	2	964.581	1928.16	0	-5.18	1.38	6858	6859	MS2	0/0	0	0	2ms21_2014_479_PFL_Fr1.mgf			32230	46100	37150	27650	33070
High	A	rLDYQEGPPGVEIScWSVEL	11506	Unambiguous	cDNA FLJ51742, highly similar to Inter-alpha-trypsin inhibitor heavy chain H4 OS=Homo sapiens PE=2 SV=1 - [B7Z544_HUMAN]	7	1	B7Z544	N-Term(TMT6plex); C15(Carbamidomethyl)	CID	1	0	1	123800	95950	91470	101800	66590	110700	Unique	Used	12611	0.004	0.13	1672	1592	4.13	1	4934000	2	1282.14	2563.28	0	3.41	1.4	6897	6898	MS2	0/0	0	0	2ms21_2014_479_PFL_Fr1.mgf			123800	95950	91470	101800	66590
High	A	dSTYSLSSTLTLSk	4222	Unambiguous	Epididymis luminal protein 213 OS=Homo sapiens GN=HEL-213 PE=2 SV=1 - [V9HW34_HUMAN]|Protein IGKV3-11 OS=Homo sapiens GN=IGKV3-11 PE=4 SV=1 - [A0A087WZW8_HUMAN]	16	2	V9HW34;A0A087WZW8	N-Term(TMT6plex); K14(TMT6plex)	CID	1	0	1		8080	7350			7502	No Quan Values	Not Used	12613	0.002	0.0677	2541	2522	1.61	0	87700	3	654.368	1961.09	0	2.01	1.4	6901	6902	MS2	0/0	0	0	2ms21_2014_479_PFL_Fr1.mgf				8080	7350
High	A	rLDYQEGPPGVEIScWSVEL	11506	Unambiguous	cDNA FLJ51742, highly similar to Inter-alpha-trypsin inhibitor heavy chain H4 OS=Homo sapiens PE=2 SV=1 - [B7Z544_HUMAN]	7	1	B7Z544	N-Term(TMT6plex); C15(Carbamidomethyl)	CID	1	0	1	38640	95210	45740	36140	59010	92890	Unique	Used	12616	0.002	0.073	1556	1447	2.08	1	1196000	3	855.095	2563.27	0	0.31	1.4	6908	6909	MS2	0/0	0	0	2ms21_2014_479_PFL_Fr1.mgf			38640	95210	45740	36140	59010
High	A	tFYETPLQLLEk	11549	Unambiguous	Macrophage colony-stimulating factor 1 (Fragment) OS=Homo sapiens GN=CSF1 PE=4 SV=1 - [E9PKP4_HUMAN]	8	1	E9PKP4	N-Term(TMT6plex); K12(TMT6plex)	CID	1	0	1	560200	521300	398500	647500	407100	487000	Unique	Used	12622	0.001	0.00533	2098	2111	4.32	0	4258000	2	970.562	1940.12	0	0.64	1.4	6921	6922	MS2	0/0	0	0	2ms21_2014_479_PFL_Fr1.mgf			560200	521300	398500	647500	407100
High	A	dGFDISGNPWIcDQNLSDLYR	11572	Unambiguous	Leucine-rich alpha-2-glycoprotein OS=Homo sapiens GN=LRG1 PE=1 SV=2 - [A2GL_HUMAN]	1	1	P02750	N-Term(TMT6plex); C12(Carbamidomethyl)	CID	1	0	1	83010	188900	165000	82760	63080	360500	Unique	Used	12627	0.001	0.0131	642	586	4.7	0	2146000	2	1357.64	2714.27	0	-0.31	1.4	6932	6933	MS2	0/0	0	0	2ms21_2014_479_PFL_Fr1.mgf			83010	188900	165000	82760	63080
High	A	rLDYQEGPPGVEIScWSVEL	11506	Unambiguous	cDNA FLJ51742, highly similar to Inter-alpha-trypsin inhibitor heavy chain H4 OS=Homo sapiens PE=2 SV=1 - [B7Z544_HUMAN]	7	1	B7Z544	N-Term(TMT6plex); C15(Carbamidomethyl)	CID	1	0	1	57380	39490	44220	50300	30160	53890	Unique	Used	12636	0.005	0.151	1580	1473	2.96	1	1697000	2	1282.14	2563.27	0	1.22	1.4	6953	6954	MS2	0/0	0	0	2ms21_2014_479_PFL_Fr1.mgf			57380	39490	44220	50300	30160
High	A	dGFDISGNPWIcDQNLSDLYR	11572	Unambiguous	Leucine-rich alpha-2-glycoprotein OS=Homo sapiens GN=LRG1 PE=1 SV=2 - [A2GL_HUMAN]	1	1	P02750	N-Term(TMT6plex); C12(Carbamidomethyl)	CID	1	0	1	166600	376600	349100	161900	163000	779600	Unique	Used	12637	0.001	0.0073	692	626	3.91	0	3923000	2	1357.64	2714.27	0	1.03	1.4	6955	6956	MS2	0/0	0	0	2ms21_2014_479_PFL_Fr1.mgf			166600	376600	349100	161900	163000
Middle	A	tAGWNIPMGLLYNk	8353	Unambiguous	Transferrin variant (Fragment) OS=Homo sapiens PE=2 SV=1 - [Q53H26_HUMAN]	6	1	Q53H26	N-Term(TMT6plex); K14(TMT6plex)	CID	1	0	1		28240	16860		14140	27020	No Quan Values	Not Used	12651	0.018	0.353	2811	2780	1.72	0	198200	3	679.384	2036.14	0	-2.12	1.42	6987	6988	MS2	0/0	0	0	2ms21_2014_479_PFL_Fr1.mgf				28240	16860		14140
High	A	sGTASVVcLLNNFYPR	11690	Unambiguous	Epididymis luminal protein 213 OS=Homo sapiens GN=HEL-213 PE=2 SV=1 - [V9HW34_HUMAN]	15	1	V9HW34	N-Term(TMT6plex); C8(Carbamidomethyl)	CID	1	0	1	331100	218600	276700	242000	153900	302900	Unique	Used	12654	0	2.59e-06	1823	1787	3.89	0	20390000	3	676.357	2027.06	0	-1.25	1.42	6994	6995	MS2	0/0	0	0	2ms21_2014_479_PFL_Fr1.mgf			331100	218600	276700	242000	153900
High	A	sGTASVVcLLNNFYPR	11690	Unambiguous	Epididymis luminal protein 213 OS=Homo sapiens GN=HEL-213 PE=2 SV=1 - [V9HW34_HUMAN]	15	1	V9HW34	N-Term(TMT6plex); C8(Carbamidomethyl)	CID	1	0	1	3583000	2684000	2635000	2183000	2074000	3687000	Unique	Used	12655	0	3.75e-05	1823	1792	5.92	0	26090000	2	1014.03	2027.06	0	-0.94	1.42	6996	6997	MS2	0/0	0	0	2ms21_2014_479_PFL_Fr1.mgf			3583000	2684000	2635000	2183000	2074000
High	A	lTVGAAQVPAQLLVGALR	11767	Unambiguous	Monocyte differentiation antigen CD14 OS=Homo sapiens PE=2 SV=1 - [B2R888_HUMAN]	3	1	B2R888	N-Term(TMT6plex)	CID	1	0	1	30020	39940	27780	39060	23630	41990	Unique	Used	12673	0	0.000115	1329	1325	4.84	0	1058000	2	1003.62	2006.23	0	-2.73	1.42	7037	7038	MS2	0/0	0	0	2ms21_2014_479_PFL_Fr1.mgf			30020	39940	27780	39060	23630
High	A	fFESFGDLSTPDAVMGNPk	11782	Unambiguous		0	0		N-Term(TMT6plex); K19(TMT6plex)	CID	1	0	1	16190	9824	11790	14470	14450	21940	No Proteins	Not Used	12676	0.001	0.0233	2062	2092	2.91	0	376500	3	839.762	2517.27	0	-1.23	1.42	7044	7045	MS2	0/0	0	0	2ms21_2014_479_PFL_Fr1.mgf			16190	9824	11790	14470	14450
High	A	sGTASVVcLLNNFYPR	11690	Unambiguous	Epididymis luminal protein 213 OS=Homo sapiens GN=HEL-213 PE=2 SV=1 - [V9HW34_HUMAN]	15	1	V9HW34	N-Term(TMT6plex); C8(Carbamidomethyl)	CID	1	0	1	5104000	3952000	3410000	3355000	3031000	4819000	Unique	Used	12694	0	0.000141	1855	1789	6.41	0	40230000	2	1014.03	2027.06	0	0.93	1.43	7084	7085	MS2	0/0	0	0	2ms21_2014_479_PFL_Fr1.mgf			5104000	3952000	3410000	3355000	3031000
High	A	wSEQSDYLELLVk	11851	Unambiguous		0	0		N-Term(TMT6plex); K13(TMT6plex)	CID	1	0	1	2320000	2230000	1920000	3303000	2291000	2720000	No Proteins	Not Used	12695	0	0.000114	2606	2560	4.77	0	21070000	2	1034.57	2068.14	0	1.55	1.43	7086	7087	MS2	0/0	0	0	2ms21_2014_479_PFL_Fr1.mgf			2320000	2230000	1920000	3303000	2291000
High	A	gTEAAGAMFLEAIPmSIPPEVk	10383	Unambiguous	Alpha-1-antitrypsin OS=Homo sapiens GN=SERPINA1 PE=1 SV=3 - [A1AT_HUMAN]	2	1	P01009	N-Term(TMT6plex); M15(Oxidation); K22(TMT6plex)	CID	1	0	1	41860	210100	78630	21010	176200	154600	Unique	Used	12696	0.002	0.0705	3042	2951	2.71	0	1686000	3	911.819	2733.44	-0.01	-6.51	1.43	7088	7089	MS2	0/0	0	0	2ms21_2014_479_PFL_Fr1.mgf			41860	210100	78630	21010	176200
High	A	gILScEASAVPmAEFQWFk	11860	Unambiguous		0	0		N-Term(TMT6plex); C5(Carbamidomethyl); M12(Oxidation); K19(TMT6plex)	CID	1	0	1	15780	20920	18460		13050	23820	No Proteins	Not Used	12697	0.001	0.00338	2196	2140	3.41	0	954100	3	882.451	2645.34	0	-4.79	1.43	7090	7091	MS2	0/0	0	0	2ms21_2014_479_PFL_Fr1.mgf			15780	20920	18460		13050
High	A	eIPAWVPFDPAAQITk	11377	Unambiguous	Zinc-alpha-2-glycoprotein OS=Homo sapiens GN=AZGP1 PE=1 SV=2 - [ZA2G_HUMAN]	1	1	P25311	N-Term(TMT6plex); K16(TMT6plex)	CID	1	0	1	412700	922500	780500	687700	698100	1420000	Unique	Used	12709	0	0.000153	2458	2526	4.61	0	8237000	2	1121.14	2241.27	0	-0.37	1.43	7117	7118	MS2	0/0	0	0	2ms21_2014_479_PFL_Fr1.mgf			412700	922500	780500	687700	698100
High	A	eIPAWVPFDPAAQITk	11377	Unambiguous	Zinc-alpha-2-glycoprotein OS=Homo sapiens GN=AZGP1 PE=1 SV=2 - [ZA2G_HUMAN]	1	1	P25311	N-Term(TMT6plex); K16(TMT6plex)	CID	1	0	1	15510	28950	44670	18320	13820	56070	Unique	Used	12714	0	0.00117	2439	2538	3.92	0	1363000	3	747.762	2241.27	0	0.71	1.43	7128	7129	MS2	0/0	0	0	2ms21_2014_479_PFL_Fr1.mgf			15510	28950	44670	18320	13820
High	A	wFYIASAFR	11357	Unambiguous	Alpha-1-acid glycoprotein 1 OS=Homo sapiens GN=ORM1 PE=1 SV=1 - [A1AG1_HUMAN]|Alpha-1-acid glycoprotein 2 OS=Homo sapiens GN=ORM2 PE=1 SV=2 - [A1AG2_HUMAN]	2	2	P02763;P19652	N-Term(TMT6plex)	CID	1	0	1	118700	695300	389500	106900	415600	948200	Not Unique	Not Used	12715	0.002	0.0388	1356	1328	3.44	0	4269000	2	695.381	1389.75	0	2.23	1.43	7130	7131	MS2	0/0	0	0	2ms21_2014_479_PFL_Fr1.mgf			118700	695300	389500	106900	415600
High	A	wYNLAIGSTcPWLk	11948	Unambiguous	Protein AMBP OS=Homo sapiens GN=AMBP PE=1 SV=1 - [AMBP_HUMAN]	1	1	P02760	N-Term(TMT6plex); C10(Carbamidomethyl); K14(TMT6plex)	CID	1	0	1	1520000	1453000	962400	2117000	1143000	1944000	Unique	Used	12719	0	0.000124	2649	2521	4.92	0	21410000	3	723.064	2167.18	0	0.43	1.43	7139	7140	MS2	0/0	0	0	2ms21_2014_479_PFL_Fr1.mgf			1520000	1453000	962400	2117000	1143000
High	A	lVSLPFGIATNQDLIR	11955	Unambiguous		0	0		N-Term(TMT6plex)	CID	1	0	1	112500	90930	59880	112600	76990	90410	No Proteins	Not Used	12721	0	9.73e-05	2179	2186	4.52	0	1874000	2	993.585	1986.16	0	1.6	1.43	7143	7144	MS2	0/0	0	0	2ms21_2014_479_PFL_Fr1.mgf			112500	90930	59880	112600	76990
High	A	lGWPAGVTLDMISk	11959	Unambiguous	Low-density lipoprotein receptor-related protein 2 OS=Homo sapiens GN=LRP2 PE=1 SV=3 - [LRP2_HUMAN]	3	1	P98164	N-Term(TMT6plex); K14(TMT6plex)	CID	1	0	1	184100	172500	275800	209200	204200	196500	Unique	Used	12722	0	0.000786	2666	2690	4.05	0	2224000	2	973.572	1946.14	0.01	9.01	1.43	7145	7146	MS2	0/0	0	0	2ms21_2014_479_PFL_Fr1.mgf			184100	172500	275800	209200	204200
High	A	fLLGSWLEQAR	11973	Unambiguous	Alpha-N-acetylglucosaminidase OS=Homo sapiens GN=ufHSD2 PE=4 SV=1 - [Q14769_HUMAN]	2	1	Q14769	N-Term(TMT6plex)	CID	1	0	1	203800	197000	187700	134900	223200	288400	Unique	Used	12725	0.001	0.00681	1949	1967	4.02	0	2282000	2	774.943	1548.88	0	3.59	1.45	7152	7153	MS2	0/0	0	0	2ms21_2014_479_PFL_Fr1.mgf			203800	197000	187700	134900	223200
High	A	wYNLAIGSTcPWLk	11948	Unambiguous	Protein AMBP OS=Homo sapiens GN=AMBP PE=1 SV=1 - [AMBP_HUMAN]	1	1	P02760	N-Term(TMT6plex); C10(Carbamidomethyl); K14(TMT6plex)	CID	1	0	1	2430000	1650000	1540000	3202000	1385000	2699000	Unique	Used	12726	0	0.000473	2662	2538	4.3	0	18530000	2	1084.09	2167.18	0	1.14	1.45	7154	7155	MS2	0/0	0	0	2ms21_2014_479_PFL_Fr1.mgf			2430000	1650000	1540000	3202000	1385000
Middle	A	aVMDDFAAFVEk	11981	Unambiguous	Albumin (Fragment) OS=Homo sapiens PE=2 SV=1 - [F6KPG5_HUMAN]	6	1	F6KPG5	N-Term(TMT6plex); K12(TMT6plex)	CID	1	0	1	71870	910000	779700	62680	890600	665900	Unique	Used	12727	0.013	0.247	1573	1520	1.1	0	11410000	3	600.992	1800.96	0	0.72	1.45	7156	7157	MS2	0/0	0	0	2ms21_2014_479_PFL_Fr1.mgf			71870	910000	779700	62680	890600
High	A	gQWGTVcDNLWDLTDASVVcR	11987	Unambiguous	cDNA FLJ53478, highly similar to Galectin-3-binding protein OS=Homo sapiens PE=2 SV=1 - [B4DVE1_HUMAN]	2	1	B4DVE1	N-Term(TMT6plex); C7(Carbamidomethyl); C20(Carbamidomethyl)	CID	1	0	1	15480	14200	13380		10640	20930	Unique	Used	12729	0	0.000766	795	799	4.48	0	1226000	3	894.428	2681.27	0	1.27	1.45	7161	7162	MS2	0/0	0	0	2ms21_2014_479_PFL_Fr1.mgf			15480	14200	13380		10640
High	A	eWFWDLATGTmk	11989	Unambiguous	Hemopexin OS=Homo sapiens GN=HPX PE=1 SV=2 - [HEMO_HUMAN]	1	1	P02790	N-Term(TMT6plex); M11(Oxidation); K12(TMT6plex)	CID	1	0	1	165900	380100	178200	197800	203900	268000	Unique	Used	12730	0	0.0011	1410	1378	3.81	0	2601000	2	980.006	1959.01	0	-1.56	1.45	7163	7164	MS2	0/0	0	0	2ms21_2014_479_PFL_Fr1.mgf			165900	380100	178200	197800	203900
High	A	gQWGTVcDNLWDLTDASVVcR	11987	Unambiguous	cDNA FLJ53478, highly similar to Galectin-3-binding protein OS=Homo sapiens PE=2 SV=1 - [B4DVE1_HUMAN]	2	1	B4DVE1	N-Term(TMT6plex); C7(Carbamidomethyl); C20(Carbamidomethyl)	CID	1	0	1	41200	29960	23050	26350	24960	28090	Unique	Used	12733	0.001	0.00947	1007	1040	4.25	0	868200	2	1341.15	2681.29	0.01	9.61	1.45	7169	7170	MS2	0/0	0	0	2ms21_2014_479_PFL_Fr1.mgf			41200	29960	23050	26350	24960
High	A	mQILEGLGLNLQk	12009	Unambiguous	Plasma serine protease inhibitor OS=Homo sapiens GN=SERPINA5 PE=1 SV=3 - [IPSP_HUMAN]	2	1	P05154	N-Term(TMT6plex); K13(TMT6plex)	CID	1	0	1	10180	7619	10780	11080	4826	12310	Unique	Used	12736	0	0.00076	1837	1830	2.82	0	132000	3	639.054	1915.15	0	1.22	1.45	7176	7177	MS2	0/0	0	0	2ms21_2014_479_PFL_Fr1.mgf			10180	7619	10780	11080	4826
High	A	eWFWDLATGTmk	11989	Unambiguous	Hemopexin OS=Homo sapiens GN=HPX PE=1 SV=2 - [HEMO_HUMAN]	1	1	P02790	N-Term(TMT6plex); M11(Oxidation); K12(TMT6plex)	CID	1	0	1	137900	128500	102100	178100	112300	187900	Unique	Used	12739	0	0.00125	1472	1436	2.71	0	2176000	3	653.675	1959.01	0	0.21	1.45	7183	7184	MS2	0/0	0	0	2ms21_2014_479_PFL_Fr1.mgf			137900	128500	102100	178100	112300
High	A	aQGFTEDTIVFLPQTDk	5298	Unambiguous	Prostaglandin-H2 D-isomerase OS=Homo sapiens GN=PTGDS PE=1 SV=1 - [PTGDS_HUMAN]	2	1	P41222	N-Term(TMT6plex); K17(TMT6plex)	CID	1	0	1	11580	21110	15100	16930	16280	18620	Unique	Used	12741	0.002	0.0317	2910	3000	2.3	0	750400	3	790.097	2368.28	0	-1.34	1.45	7187	7188	MS2	0/0	0	0	2ms21_2014_479_PFL_Fr1.mgf			11580	21110	15100	16930	16280
High	A	mQILEGLGLNLQk	12009	Unambiguous	Plasma serine protease inhibitor OS=Homo sapiens GN=SERPINA5 PE=1 SV=3 - [IPSP_HUMAN]	2	1	P05154	N-Term(TMT6plex); K13(TMT6plex)	CID	1	0	1	219700	338900	130900	268800	127700	266400	Unique	Used	12748	0	0.000313	1545	1572	5.1	0	2256000	2	958.084	1915.16	0.01	8.24	1.45	7202	7203	MS2	0/0	0	0	2ms21_2014_479_PFL_Fr1.mgf			219700	338900	130900	268800	127700
High	A	lSSWVLLMk	12057	Unambiguous	Alpha-1-antitrypsin OS=Homo sapiens GN=SERPINA1 PE=1 SV=3 - [A1AT_HUMAN]	5	1	P01009	N-Term(TMT6plex); K9(TMT6plex)	CID	1	0	1	367500	1245000	592400	285000	1265000	1109000	Unique	Used	12749	0.001	0.0159	1323	1316	3.59	0	6159000	2	767.977	1534.95	0	2.29	1.45	7205	7206	MS2	0/0	0	0	2ms21_2014_479_PFL_Fr1.mgf			367500	1245000	592400	285000	1265000
High	A	aVMDDFAAFVEk	11981	Unambiguous	Albumin (Fragment) OS=Homo sapiens PE=2 SV=1 - [F6KPG5_HUMAN]	6	1	F6KPG5	N-Term(TMT6plex); K12(TMT6plex)	CID	1	0	1	155200	1516000	1257000	113600	1245000	999900	Unique	Used	12754	0	0.00132	1605	1563	4.41	0	7734000	2	900.987	1800.97	0	2.93	1.45	7216	7217	MS2	0/0	0	0	2ms21_2014_479_PFL_Fr1.mgf			155200	1516000	1257000	113600	1245000
High	A	lSSWVLLMk	12057	Unambiguous	Alpha-1-antitrypsin OS=Homo sapiens GN=SERPINA1 PE=1 SV=3 - [A1AT_HUMAN]	5	1	P01009	N-Term(TMT6plex); K9(TMT6plex)	CID	1	0	1	11740	47880	33460	9405	55800	50040	Unique	Used	12755	0.002	0.0663	1417	1398	1.73	0	358000	3	512.319	1534.94	0	-0.9	1.45	7218	7219	MS2	0/0	0	0	2ms21_2014_479_PFL_Fr1.mgf			11740	47880	33460	9405	55800
High	A	gQWGTVcDNLWDLTDASVVcR	11987	Unambiguous	cDNA FLJ53478, highly similar to Galectin-3-binding protein OS=Homo sapiens PE=2 SV=1 - [B4DVE1_HUMAN]	2	1	B4DVE1	N-Term(TMT6plex); C7(Carbamidomethyl); C20(Carbamidomethyl)	CID	1	0	1	271800	195500	208300	183500	159700	193000	Unique	Used	12761	0.001	0.00441	812	842	4.18	0	2527000	2	1341.14	2681.27	0	2.42	1.45	7232	7233	MS2	0/0	0	0	2ms21_2014_479_PFL_Fr1.mgf			271800	195500	208300	183500	159700
High	A	iLEmDIEEIQNcYYDk	12152	Unambiguous	Intrinsic factor-vitamin B12 receptor (Fragment) OS=Homo sapiens GN=CUBN PE=4 SV=1 - [Q7LC53_HUMAN]	2	1	Q7LC53	N-Term(TMT6plex); M4(Oxidation); C12(Carbamidomethyl); K16(TMT6plex)	CID	1	0	1	7363	11050		10440		9290	Unique	Used	12772	0.001	0.019	1061	1080	3.46	0	408400	3	850.75	2550.24	-0.01	-6.05	1.47	7256	7257	MS2	0/0	0	0	2ms21_2014_479_PFL_Fr1.mgf			7363	11050		10440
High	A	sGTASVVcLLNNFYPR	11690	Unambiguous	Epididymis luminal protein 213 OS=Homo sapiens GN=HEL-213 PE=2 SV=1 - [V9HW34_HUMAN]	15	1	V9HW34	N-Term(TMT6plex); C8(Carbamidomethyl)	CID	1	0	1	59100	49460	27030	47320	48190	56880	Unique	Used	12782	0	1.43e-05	1861	1802	3.17	0	4779000	3	676.358	2027.06	0	0.56	1.47	7280	7281	MS2	0/0	0	0	2ms21_2014_479_PFL_Fr1.mgf			59100	49460	27030	47320	48190
High	A	aVVHGILMGVPVPFPIPEPDGck	12239	Unambiguous		0	0		N-Term(TMT6plex); C22(Carbamidomethyl); K23(TMT6plex)	CID	1	0	1	11990	16760	10140	15300	12240		No Proteins	Not Used	12794	0	0.000196	3228	3188	5.64	0	1230000	3	963.2	2887.59	0	-4.34	1.47	7306	7307	MS2	0/0	0	0	2ms21_2014_479_PFL_Fr1.mgf			11990	16760	10140	15300	12240
High	A	lYPELSQYMGLSLNEEEIR	12296	Unambiguous		0	0		N-Term(TMT6plex)	CID	1	0	1	13370	7304	7357		8202	13680	No Proteins	Not Used	12811	0	0.000218	2289	2379	3.63	0	689900	3	838.432	2513.28	0	0.24	1.48	7344	7345	MS2	0/0	0	0	2ms21_2014_479_PFL_Fr1.mgf			13370	7304	7357		8202
High	A	gGLPLEEVTVAEVLAAR	12351	Unambiguous	Isoform 2 of Arylsulfatase A OS=Homo sapiens GN=ARSA - [ARSA_HUMAN]	4	1	P15289-2	N-Term(TMT6plex)	CID	1	0	1	246400	176500	184900	195500	171000	200700	Unique	Used	12827	0	1.32e-05	2063	1913	5.38	0	2306000	2	977.068	1953.13	0	3.79	1.48	7379	7380	MS2	0/0	0	0	2ms21_2014_479_PFL_Fr1.mgf			246400	176500	184900	195500	171000
Middle	A	gTEAAGAmFLEAIPMSIPPEVk	10383	Unambiguous	Alpha-1-antitrypsin OS=Homo sapiens GN=SERPINA1 PE=1 SV=3 - [A1AT_HUMAN]	2	1	P01009	N-Term(TMT6plex); M8(Oxidation); K22(TMT6plex)	CID	0.0425	0	1	17840	105000	36320	20640	72420	82420	Unique	Used	12829	0.012	0.214	3279	3117	2.59	0	1676000	3	911.827	2733.47	0	2.53	1.48	7384	7385	MS2	0/0	0	0	2ms21_2014_479_PFL_Fr1.mgf			17840	105000	36320	20640	72420
High	A	sGTASVVcLLNNFYPR	11690	Unambiguous	Epididymis luminal protein 213 OS=Homo sapiens GN=HEL-213 PE=2 SV=1 - [V9HW34_HUMAN]	15	1	V9HW34	N-Term(TMT6plex); C8(Carbamidomethyl)	CID	1	0	1	462000	367800	387300	293300	331700	507300	Unique	Used	12830	0	0.000179	1825	1788	4.74	0	4721000	2	1014.03	2027.06	0	-1.42	1.48	7386	7387	MS2	0/0	0	0	2ms21_2014_479_PFL_Fr1.mgf			462000	367800	387300	293300	331700
High	A	aGFSWIEVTFk	12377	Unambiguous	cDNA FLJ51742, highly similar to Inter-alpha-trypsin inhibitor heavy chain H4 OS=Homo sapiens PE=2 SV=1 - [B7Z544_HUMAN]	7	1	B7Z544	N-Term(TMT6plex); K11(TMT6plex)	CID	1	0	1	3502000	2401000	2937000	4063000	1986000	4573000	Unique	Used	12834	0	0.000612	1857	1826	5.42	0	25880000	2	871.997	1742.99	0	-0.36	1.48	7395	7396	MS2	0/0	0	0	2ms21_2014_479_PFL_Fr1.mgf			3502000	2401000	2937000	4063000	1986000
Middle	A	nVQALEIELQSQLALk	12383	Unambiguous	Keratin, type I cytoskeletal 10 OS=Homo sapiens GN=KRT10 PE=1 SV=6 - [K1C10_HUMAN]	1	1	P13645	N-Term(TMT6plex); K16(TMT6plex)	CID	1	0	1	14890	12730	11450		12130	23050	Unique	Used	12835	0.018	0.345	1819	1782	2	0	688900	3	752.446	2255.32	0	-6.62	1.48	7397	7398	MS2	0/0	0	0	2ms21_2014_479_PFL_Fr1.mgf			14890	12730	11450		12130
High	A	yLDFVFAVk	12389	Unambiguous	cDNA FLJ58780, highly similar to Homo sapiens lysosomal-associated membrane protein 2 (LAMP2), transcript variant LAMP2B, mRNA OS=Homo sapiens PE=2 SV=1 - [B4E2S7_HUMAN]	4	1	B4E2S7	N-Term(TMT6plex); K9(TMT6plex)	CID	1	0	1	14880	18280	18170	16570	18110	20700	Unique	Used	12838	0.001	0.00902	1811	1778	3.55	0	438200	2	780.466	1559.93	0	0.9	1.48	7403	7404	MS2	0/0	0	0	2ms21_2014_479_PFL_Fr1.mgf			14880	18280	18170	16570	18110
High	A	vFVGATDSAVPcAMMLELAR	12393	Unambiguous	Glutaminyl-peptide cyclotransferase (Fragment) OS=Homo sapiens GN=QPCT PE=4 SV=1 - [B5MCZ9_HUMAN]	3	1	B5MCZ9	N-Term(TMT6plex); C12(Carbamidomethyl)	CID	1	0	1	42310	37000	31010	52000	34440	28940	Unique	Used	12839	0	0.000295	2050	2032	4.17	0	1256000	2	1184.1	2367.2	0	-1.97	1.48	7406	7407	MS2	0/0	0	0	2ms21_2014_479_PFL_Fr1.mgf			42310	37000	31010	52000	34440
High	A	eNQLEVLEVSWLHGLk	12406	Unambiguous	Leucine-rich alpha-2-glycoprotein OS=Homo sapiens GN=LRG1 PE=1 SV=2 - [A2GL_HUMAN]	1	1	P02750	N-Term(TMT6plex); K16(TMT6plex)	CID	1	0	1	33120	44190	43300	22360	24480	92790	Unique	Used	12842	0	8.28e-06	2424	2357	5.66	0	1427000	3	784.786	2352.34	0	3.9	1.48	7412	7413	MS2	0/0	0	0	2ms21_2014_479_PFL_Fr1.mgf			33120	44190	43300	22360	24480
High	A	sLDLDSIIAEVk	12416	Unambiguous	Keratin 1 OS=Homo sapiens GN=KRT1 PE=3 SV=1 - [H6VRF8_HUMAN]	6	1	H6VRF8	N-Term(TMT6plex); K12(TMT6plex)	CID	1	0	1	4266	3776	5162			5587	Unique	Used	12845	0.005	0.137	2394	2418	1.78	0	111100	3	587.685	1761.04	0	-0.04	1.48	7419	7420	MS2	0/0	0	0	2ms21_2014_479_PFL_Fr1.mgf			4266	3776	5162
High	A	sLDLDSIIAEVk	12416	Unambiguous	Keratin 1 OS=Homo sapiens GN=KRT1 PE=3 SV=1 - [H6VRF8_HUMAN]	6	1	H6VRF8	N-Term(TMT6plex); K12(TMT6plex)	CID	1	0	1	244300	428700	222800	203200	424800	415500	Unique	Used	12846	0	0.000267	2322	2370	5.21	0	3083000	2	881.026	1761.04	0	2.22	1.48	7421	7422	MS2	0/0	0	0	2ms21_2014_479_PFL_Fr1.mgf			244300	428700	222800	203200	424800
High	A	gILTVDELLAIR	12422	Unambiguous	cDNA FLJ58780, highly similar to Homo sapiens lysosomal-associated membrane protein 2 (LAMP2), transcript variant LAMP2B, mRNA OS=Homo sapiens PE=2 SV=1 - [B4E2S7_HUMAN]	4	1	B4E2S7	N-Term(TMT6plex)	CID	1	0	1	15810	14120	22140	13730	8064	12580	Unique	Used	12847	0.001	0.0119	1270	1221	3.54	0	370500	3	514.652	1541.94	0	-3.19	1.48	7423	7424	MS2	0/0	0	0	2ms21_2014_479_PFL_Fr1.mgf			15810	14120	22140	13730	8064
High	A	wFYIASAFR	11357	Unambiguous	Alpha-1-acid glycoprotein 1 OS=Homo sapiens GN=ORM1 PE=1 SV=1 - [A1AG1_HUMAN]|Alpha-1-acid glycoprotein 2 OS=Homo sapiens GN=ORM2 PE=1 SV=2 - [A1AG2_HUMAN]	2	2	P02763;P19652	N-Term(TMT6plex)	CID	1	0	1	45280	303300	190300	69820	172400	386300	Not Unique	Not Used	12850	0.001	0.0312	1306	1284	3.04	0	1793000	2	695.38	1389.75	0	0.21	1.48	7430	7431	MS2	0/0	0	0	2ms21_2014_479_PFL_Fr1.mgf			45280	303300	190300	69820	172400
High	A	aQGFTEDTIVFLPQTDk	5298	Unambiguous	Prostaglandin-H2 D-isomerase OS=Homo sapiens GN=PTGDS PE=1 SV=1 - [PTGDS_HUMAN]	2	1	P41222	N-Term(TMT6plex); K17(TMT6plex)	CID	1	0	1	9092						No Quan Values	Not Used	12873	0.001	0.0105	2956	3039	3.94	0	1037000	3	790.098	2368.28	0	-0.49	1.5	7482	7483	MS2	0/0	0	0	2ms21_2014_479_PFL_Fr1.mgf			9092
High	A	yQLTLWGPEGNILDYANk	12567	Unambiguous	Alpha-N-acetylglucosaminidase OS=Homo sapiens GN=ufHSD2 PE=4 SV=1 - [Q14769_HUMAN]	2	1	Q14769	N-Term(TMT6plex); K18(TMT6plex)	CID	1	0	1	123400	82070	124200	56500	86440	143100	Unique	Used	12882	0	0.000101	2969	3022	5.34	0	2022000	3	851.798	2553.38	0	1.19	1.5	7502	7503	MS2	0/0	0	0	2ms21_2014_479_PFL_Fr1.mgf			123400	82070	124200	56500	86440
High	A	gTVFFDEFTFVk	12569	Unambiguous		0	0		N-Term(TMT6plex); K12(TMT6plex)	CID	1	0	1	179500	324700	275300	118800	213300	346800	No Proteins	Not Used	12883	0	0.000715	2120	2100	4.35	0	2209000	2	948.02	1895.03	0	-1.42	1.5	7504	7505	MS2	0/0	0	0	2ms21_2014_479_PFL_Fr1.mgf			179500	324700	275300	118800	213300
Middle	A	nVFQLEQAFVLSk	12596	Unambiguous	Alpha-N-acetylglucosaminidase OS=Homo sapiens GN=ufHSD2 PE=4 SV=1 - [Q14769_HUMAN]	2	1	Q14769	N-Term(TMT6plex); K13(TMT6plex)	CID	1	0	1	30270	27570	27100	20690	11990	31430	Unique	Used	12891	0.012	0.236	2024	1938	1.65	0	332700	3	661.056	1981.15	0	0.05	1.5	7522	7523	MS2	0/0	0	0	2ms21_2014_479_PFL_Fr1.mgf			30270	27570	27100	20690	11990
High	A	lGLLGDSVDIFk	12614	Unambiguous	Bile salt-dependent lipase oncofetal isoform (Fragment) OS=Homo sapiens PE=2 SV=1 - [O75612_HUMAN]	5	1	O75612	N-Term(TMT6plex); K12(TMT6plex)	CID	1	0	1	1261000	1232000	950000	2583000	713800	1551000	Unique	Used	12895	0	0.000185	1986	1811	4.26	0	10930000	2	868.023	1735.04	0	-0.83	1.5	7530	7531	MS2	0/0	0	0	2ms21_2014_479_PFL_Fr1.mgf			1261000	1232000	950000	2583000	713800
High	A	vDLLNQEIEFLk	12618	Unambiguous	Keratin, type II cytoskeletal 2 epidermal OS=Homo sapiens GN=KRT2 PE=1 SV=2 - [K22E_HUMAN]	1	1	P35908	N-Term(TMT6plex); K12(TMT6plex)	CID	1	0	1	512300	832500	445400	550800	990100	1005000	Unique	Used	12896	0	0.000448	2168	2236	5.11	0	5830000	2	960.066	1919.12	0	-0.47	1.5	7533	7534	MS2	0/0	0	0	2ms21_2014_479_PFL_Fr1.mgf			512300	832500	445400	550800	990100
High	A	vTASDPLDTLGSEGALSPGGVASLLR	12685	Unambiguous	Isoform 2 of Complement C4-A OS=Homo sapiens GN=C4A - [CO4A_HUMAN]	5	1	P0C0L4-2	N-Term(TMT6plex)	CID	1	0	1	29050	28450	28580	17670	25770	29130	Unique	Used	12911	0	0.000326	3721	3770	5.62	0	1354000	3	904.826	2712.46	0	1.12	1.52	7567	7568	MS2	0/0	0	0	2ms21_2014_479_PFL_Fr1.mgf			29050	28450	28580	17670	25770
High	A	iLEMDIEEIQNcYYDk	12152	Unambiguous	Intrinsic factor-vitamin B12 receptor (Fragment) OS=Homo sapiens GN=CUBN PE=4 SV=1 - [Q7LC53_HUMAN]	2	1	Q7LC53	N-Term(TMT6plex); C12(Carbamidomethyl); K16(TMT6plex)	CID	1	0	1	27230	71570	43590	38200	47070	69960	Unique	Used	12918	0	0.00102	1223	1295	4.59	0	1347000	3	845.42	2534.25	0	-4.1	1.52	7583	7584	MS2	0/0	0	0	2ms21_2014_479_PFL_Fr1.mgf			27230	71570	43590	38200	47070
High	A	vFYSITGQGADTPPVGVFIIER	12729	Unambiguous	Cadherin-1 OS=Homo sapiens GN=CDH1 PE=1 SV=1 - [H3BNC6_HUMAN]	9	1	H3BNC6	N-Term(TMT6plex)	CID	1	0	1	40120	55180					Unique	Used	12922	0	0.000463	3356	3294	4.09	0	870100	3	865.806	2595.4	0	0.48	1.52	7592	7593	MS2	0/0	0	0	2ms21_2014_479_PFL_Fr1.mgf			40120	55180
High	A	lVDQNIFSFYLSR	12731	Unambiguous	Cathepsin D OS=Homo sapiens GN=CTSD PE=1 SV=1 - [CATD_HUMAN]	1	1	P07339	N-Term(TMT6plex)	CID	1	0	1	603900	499000	1381000	670100	482000	711500	Unique	Used	12923	0.001	0.00962	2283	2173	3.26	0	6649000	2	916.001	1831	0	0.05	1.52	7594	7595	MS2	0/0	0	0	2ms21_2014_479_PFL_Fr1.mgf			603900	499000	1381000	670100	482000
High	A	gGVLFAITDAFQk	12743	Unambiguous		0	0		N-Term(TMT6plex); K13(TMT6plex)	CID	1	0	1	50300	33040	30840	76860	31250	37990	No Proteins	Not Used	12926	0.001	0.0192	1759	1721	2.31	0	453600	3	609.026	1825.06	0	-0.16	1.52	7600	7601	MS2	0/0	0	0	2ms21_2014_479_PFL_Fr1.mgf			50300	33040	30840	76860	31250
High	A	wQTLLSVDDLVEk	12747	Unambiguous	N-acetylglucosamine-6-sulfatase (Fragment) OS=Homo sapiens GN=GNS PE=1 SV=3 - [F5H4C6_HUMAN]	9	1	F5H4C6	N-Term(TMT6plex); K13(TMT6plex)	CID	1	0	1	591300	746100	787800	651700	668200	1120000	Unique	Used	12928	0	0.000372	3033	3048	5.74	0	6177000	2	1002.58	2004.15	0	4.96	1.52	7605	7606	MS2	0/0	0	0	2ms21_2014_479_PFL_Fr1.mgf			591300	746100	787800	651700	668200
High	A	lTGLLDLALEkDYVR	12769	Unambiguous	Pancreatic alpha-amylase OS=Homo sapiens GN=AMY2A PE=1 SV=2 - [AMYP_HUMAN]	5	1	P04746	N-Term(TMT6plex); K11(TMT6plex)	CID	1	0	1	17040	10680	15180	15620	9515	21900	Unique	Used	12933	0.002	0.0744	1486	1584	2.9	1	440400	3	726.439	2177.3	0	3.61	1.52	7616	7617	MS2	0/0	0	0	2ms21_2014_479_PFL_Fr1.mgf			17040	10680	15180	15620	9515
High	A	wQTLLSVDDLVEk	12747	Unambiguous	N-acetylglucosamine-6-sulfatase (Fragment) OS=Homo sapiens GN=GNS PE=1 SV=3 - [F5H4C6_HUMAN]	9	1	F5H4C6	N-Term(TMT6plex); K13(TMT6plex)	CID	1	0	1							No Quan Values	Not Used	12937	0	0.00154	3105	3108	2.24	0	902500	3	668.718	2004.14	0	-0.53	1.52	7625	7626	MS2	0/0	0	0	2ms21_2014_479_PFL_Fr1.mgf
High	A	gILTVDELLAIR	12422	Unambiguous	cDNA FLJ58780, highly similar to Homo sapiens lysosomal-associated membrane protein 2 (LAMP2), transcript variant LAMP2B, mRNA OS=Homo sapiens PE=2 SV=1 - [B4E2S7_HUMAN]	4	1	B4E2S7	N-Term(TMT6plex)	CID	1	0	1	281100	271300	381000	337900	252900	254900	Unique	Used	12948	0	0.000669	1152	1139	4.16	0	2774000	2	771.477	1541.95	0	0.06	1.53	7649	7650	MS2	0/0	0	0	2ms21_2014_479_PFL_Fr1.mgf			281100	271300	381000	337900	252900
High	A	dGWQLQVQGGVAQLVIk	10728	Unambiguous		0	0		N-Term(TMT6plex); K17(TMT6plex)	CID	1	0	1	8599	21790	12760	10370	10320	22330	No Proteins	Not Used	12950	0.001	0.0261	1952	1890	2.66	0	387000	3	766.452	2297.34	0	1.5	1.53	7653	7654	MS2	0/0	0	0	2ms21_2014_479_PFL_Fr1.mgf			8599	21790	12760	10370	10320
High	A	iTGTmPPLPLEATGLALSSLR	12853	Unambiguous	Monocyte differentiation antigen CD14 OS=Homo sapiens PE=2 SV=1 - [B2R888_HUMAN]	3	1	B2R888	N-Term(TMT6plex); M5(Oxidation)	CID	1	0	1	52120	38630	42040	55220	32310	80060	Unique	Used	12954	0	8.54e-05	2501	2394	4.73	0	1835000	3	795.123	2383.35	0	2.99	1.53	7662	7663	MS2	0/0	0	0	2ms21_2014_479_PFL_Fr1.mgf			52120	38630	42040	55220	32310
High	A	dVFLGmFLYEYAR	12855	Unambiguous	Albumin (Fragment) OS=Homo sapiens PE=2 SV=1 - [F6KPG5_HUMAN]	5	1	F6KPG5	N-Term(TMT6plex); M6(Oxidation)	CID	1	0	1	122500	1236000	694800	66900	1102000	880400	Unique	Used	12955	0.001	0.00521	1169	1106	3.74	0	8119000	2	934.975	1868.94	0	-1.83	1.53	7664	7665	MS2	0/0	0	0	2ms21_2014_479_PFL_Fr1.mgf			122500	1236000	694800	66900	1102000
High	A	fDLNDVYVYWQTSESk	12870	Unambiguous	ICOS ligand OS=Homo sapiens GN=ICOSLG PE=1 SV=2 - [ICOSL_HUMAN]	3	1	O75144	N-Term(TMT6plex); K16(TMT6plex)	CID	1	0	1	62680	54600	47910	86950	37890	64370	Unique	Used	12958	0	6.7e-05	2126	2260	3.59	0	1955000	3	818.089	2452.25	0	3.25	1.53	7671	7672	MS2	0/0	0	0	2ms21_2014_479_PFL_Fr1.mgf			62680	54600	47910	86950	37890
High	A	lDTLAQEVALLk	12868	Unambiguous	Tetranectin OS=Homo sapiens GN=CLEC3B PE=4 SV=1 - [E9PHK0_HUMAN]	2	1	E9PHK0	N-Term(TMT6plex); K12(TMT6plex)	CID	1	0	1	3631000	2163000	2706000	7937000	3223000	4489000	Unique	Used	12962	0	0.000501	1384	1329	5.03	0	31650000	2	886.55	1772.09	0	-0.07	1.53	7680	7681	MS2	0/0	0	0	2ms21_2014_479_PFL_Fr1.mgf			3631000	2163000	2706000	7937000	3223000
High	A	dSSTWLTAFVLk	12901	Unambiguous	Isoform 2 of Complement C4-A OS=Homo sapiens GN=C4A - [CO4A_HUMAN]	3	1	P0C0L4-2	N-Term(TMT6plex); K12(TMT6plex)	CID	1	0	1	2079000	686200	734500	2402000	1732000	1006000	Unique	Used	12967	0.001	0.00711	1941	1926	2.67	0	11220000	2	913.53	1826.05	0	3.43	1.53	7691	7692	MS2	0/0	0	0	2ms21_2014_479_PFL_Fr1.mgf			2079000	686200	734500	2402000	1732000
High	A	eQLGEFYEALDcLcIPR	12930	Unambiguous	Alpha-1-acid glycoprotein 2 OS=Homo sapiens GN=ORM2 PE=1 SV=2 - [A1AG2_HUMAN]	1	1	P19652	N-Term(TMT6plex); C12(Carbamidomethyl); C14(Carbamidomethyl)	CID	1	0	1							No Quan Values	Not Used	12972	0	0.000454	1286	1228	2.99	0	2458000	3	781.384	2342.14	0	0.46	1.53	7702	7703	MS2	0/0	0	0	2ms21_2014_479_PFL_Fr1.mgf
High	A	vSFLSALEEYTk	12932	Unambiguous	Apolipoprotein A-I OS=Homo sapiens GN=APOA1 PE=1 SV=1 - [APOA1_HUMAN]	2	1	P02647	N-Term(TMT6plex); K12(TMT6plex)	CID	1	0	1	1144000	5443000		186000	6037000	11350000	Unique	Used	12973	0	0.000235	2481	2417	5.61	0	32270000	2	923.024	1845.04	0	-0.05	1.53	7704	7705	MS2	0/0	0	0	2ms21_2014_479_PFL_Fr1.mgf			1144000	5443000		186000	6037000
High	A	vSFLSALEEYTk	12932	Unambiguous	Apolipoprotein A-I OS=Homo sapiens GN=APOA1 PE=1 SV=1 - [APOA1_HUMAN]	2	1	P02647	N-Term(TMT6plex); K12(TMT6plex)	CID	1	0	1		57170		39190	50710	92820	No Quan Values	Not Used	12974	0.004	0.124	2498	2436	2.32	0	653500	3	615.685	1845.04	0	0.37	1.53	7706	7707	MS2	0/0	0	0	2ms21_2014_479_PFL_Fr1.mgf				57170		39190	50710
High	A	vTIGLLFWDGR	12938	Unambiguous	cDNA FLJ51742, highly similar to Inter-alpha-trypsin inhibitor heavy chain H4 OS=Homo sapiens PE=2 SV=1 - [B7Z544_HUMAN]	7	1	B7Z544	N-Term(TMT6plex)	CID	1	0	1	643900	621800	639400	883300	547600	846300	Unique	Used	12975	0	0.00315	2011	1999	3.99	0	5610000	2	753.438	1505.87	0	0.33	1.53	7708	7709	MS2	0/0	0	0	2ms21_2014_479_PFL_Fr1.mgf			643900	621800	639400	883300	547600
High	A	eQLGEFYEALDcLcIPR	12930	Unambiguous	Alpha-1-acid glycoprotein 2 OS=Homo sapiens GN=ORM2 PE=1 SV=2 - [A1AG2_HUMAN]	1	1	P19652	N-Term(TMT6plex); C12(Carbamidomethyl); C14(Carbamidomethyl)	CID	1	0	1	146900	692700	419300	150600	504200	739700	Unique	Used	12979	0.001	0.00477	1288	1235	4.09	0	6839000	2	1171.57	2342.14	0	1.3	1.53	7717	7718	MS2	0/0	0	0	2ms21_2014_479_PFL_Fr1.mgf			146900	692700	419300	150600	504200
High	A	mLSSFLSEDVFk	12965	Unambiguous	Aminopeptidase N OS=Homo sapiens GN=ANPEP PE=1 SV=4 - [AMPN_HUMAN]	3	1	P15144	N-Term(TMT6plex); K12(TMT6plex)	CID	1	0	1	949900	696400	1084000	688300	1257000	814500	Unique	Used	12981	0	0.000444	2336	2173	4.87	0	7210000	2	931.013	1861.02	0	0.73	1.53	7722	7723	MS2	0/0	0	0	2ms21_2014_479_PFL_Fr1.mgf			949900	696400	1084000	688300	1257000
Middle	A	lWWLDLk	12985	Unambiguous	Hemopexin OS=Homo sapiens GN=HPX PE=1 SV=2 - [HEMO_HUMAN]	1	1	P02790	N-Term(TMT6plex); K7(TMT6plex)	CID	1	0	1	388500	1353000	457100	331400	627900	946300	Unique	Used	12986	0.043	0.567	1783	1800	2.48	0	5405000	2	716.442	1431.88	0	0.2	1.53	7733	7734	MS2	0/0	0	0	2ms21_2014_479_PFL_Fr1.mgf			388500	1353000	457100	331400	627900
High	A	lIEEGVDVPEGLAVDWIGR	13112	Unambiguous	Isoform 2 of Pro-epidermal growth factor OS=Homo sapiens GN=EGF - [EGF_HUMAN]	3	1	P01133-2	N-Term(TMT6plex)	CID	1	0	1	124500	76010	35880	135900	87100	98190	Unique	Used	13017	0	0.000121	2825	2781	5.34	0	2216000	2	1148.63	2296.25	0.01	6.09	1.55	7802	7803	MS2	0/0	0	0	2ms21_2014_479_PFL_Fr1.mgf			124500	76010	35880	135900	87100
High	A	aFIQLWAFDAVk	13171	Unambiguous	Protein AMBP OS=Homo sapiens GN=AMBP PE=1 SV=1 - [AMBP_HUMAN]	1	1	P02760	N-Term(TMT6plex); K12(TMT6plex)	CID	1	0	1	366600	276500	247600	487800	237000	319800	Unique	Used	13032	0.006	0.17	1905	1815	1.46	0	2925000	3	623.035	1867.09	0	0.72	1.57	7837	7838	MS2	0/0	0	0	2ms21_2014_479_PFL_Fr1.mgf			366600	276500	247600	487800	237000
High	A	aFIQLWAFDAVk	13171	Unambiguous	Protein AMBP OS=Homo sapiens GN=AMBP PE=1 SV=1 - [AMBP_HUMAN]	1	1	P02760	N-Term(TMT6plex); K12(TMT6plex)	CID	1	0	1	805300	731600	547800	1337000	573600	1074000	Unique	Used	13037	0	0.00035	1905	1815	4.55	0	7137000	2	934.048	1867.09	0	0.66	1.57	7848	7849	MS2	0/0	0	0	2ms21_2014_479_PFL_Fr1.mgf			805300	731600	547800	1337000	573600
High	A	wQPAIATVDSYVISYTGEk	13211	Unambiguous		0	0		N-Term(TMT6plex); K19(TMT6plex)	CID	1	0	1	8847	6618	10780	11730	6484	9470	No Proteins	Not Used	13043	0.001	0.0192	3355	3296	2.03	0	427900	3	862.803	2586.39	0	3.38	1.57	7863	7864	MS2	0/0	0	0	2ms21_2014_479_PFL_Fr1.mgf			8847	6618	10780	11730	6484
High	A	eQLGEFYEALDcLcIPR	12930	Unambiguous	Alpha-1-acid glycoprotein 2 OS=Homo sapiens GN=ORM2 PE=1 SV=2 - [A1AG2_HUMAN]	1	1	P19652	N-Term(TMT6plex); C12(Carbamidomethyl); C14(Carbamidomethyl)	CID	1	0	1	519700	2735000	1627000	547600	1876000	2877000	Unique	Used	13052	0	0.00185	1349	1280	4.41	0	18710000	2	1171.57	2342.14	0	1.93	1.57	7883	7884	MS2	0/0	0	0	2ms21_2014_479_PFL_Fr1.mgf			519700	2735000	1627000	547600	1876000
High	A	aGFALDEGIANPTDAFTVFYSER	13292	Unambiguous		0	0		N-Term(TMT6plex)	CID	1	0	1	23380	59350	47150	24580	46550	52970	No Proteins	Not Used	13063	0	0.00201	1527	1448	2.31	0	1158000	3	907.451	2720.34	0	-0.48	1.57	7909	7910	MS2	0/0	0	0	2ms21_2014_479_PFL_Fr1.mgf			23380	59350	47150	24580	46550
High	A	dTLcGDcWPGWFGPWGVPR	13331	Unambiguous	Tumor necrosis factor receptor superfamily member 19L OS=Homo sapiens GN=RELT PE=1 SV=1 - [TR19L_HUMAN]	1	1	Q969Z4	N-Term(TMT6plex); C4(Carbamidomethyl); C7(Carbamidomethyl)	CID	1	0	1	114200	90010	54330	193800	38910	84430	Unique	Used	13072	0.001	0.0104	464	502	4.62	0	1818000	2	1246.58	2492.16	0.01	4.86	1.58	7929	7930	MS2	0/0	0	0	2ms21_2014_479_PFL_Fr1.mgf			114200	90010	54330	193800	38910
High	A	sAGWNIPIGLLYcDLPEPR	13350	Unambiguous	Transferrin variant (Fragment) OS=Homo sapiens PE=2 SV=1 - [Q53H26_HUMAN]	4	1	Q53H26	N-Term(TMT6plex); C13(Carbamidomethyl)	CID	1	0	1	80360	687300	295700	73770	579700	629100	Unique	Used	13077	0	0.000336	2659	2904	4.26	0	5166000	2	1200.63	2400.26	0	1.5	1.58	7940	7941	MS2	0/0	0	0	2ms21_2014_479_PFL_Fr1.mgf			80360	687300	295700	73770	579700
High	A	lVTLEEFLASTQR	13363	Unambiguous		0	0		N-Term(TMT6plex)	CID	1	0	1	391500	237000	183400	219500	251000	277200	No Proteins	Not Used	13080	0	0.000473	2006	1898	5.4	0	2979000	2	868.493	1735.98	0	-0.32	1.58	7946	7947	MS2	0/0	0	0	2ms21_2014_479_PFL_Fr1.mgf			391500	237000	183400	219500	251000
High	A	sAGWNIPIGLLYcDLPEPR	13350	Unambiguous	Transferrin variant (Fragment) OS=Homo sapiens PE=2 SV=1 - [Q53H26_HUMAN]	4	1	Q53H26	N-Term(TMT6plex); C13(Carbamidomethyl)	CID	1	0	1		1115000	501400	71760	860700	889700	No Quan Values	Not Used	13092	0.001	0.00457	2641	2891	3.91	0	10210000	2	1200.64	2400.26	0	2.01	1.58	7973	7974	MS2	0/0	0	0	2ms21_2014_479_PFL_Fr1.mgf				1115000	501400	71760	860700
High	A	vTWAPPPSIDLTNFLVR	13419	Unambiguous	Putative uncharacterized protein DKFZp686O12165 (Fragment) OS=Homo sapiens GN=DKFZp686O12165 PE=1 SV=1 - [Q6MZM7_HUMAN]	3	1	Q6MZM7	N-Term(TMT6plex)	CID	1	0	1	13850	11170	8351	8738	17600	12470	Unique	Used	13093	0.001	0.00569	2161	2218	3.71	0	193300	3	719.077	2155.22	0	2.56	1.58	7975	7976	MS2	0/0	0	0	2ms21_2014_479_PFL_Fr1.mgf			13850	11170	8351	8738	17600
High	A	lIccDILDVLDk	13421	Unambiguous	cDNA, FLJ79100, highly similar to 14-3-3 protein epsilon (14-3-3E) OS=Homo sapiens PE=2 SV=1 - [B7ZA86_HUMAN]	6	1	B7ZA86	N-Term(TMT6plex); C3(Carbamidomethyl); C4(Carbamidomethyl); K12(TMT6plex)	CID	1	0	1						8143	No Quan Values	Not Used	13094	0.003	0.112	2472	2453	2.24	0	127300	3	645.696	1935.07	0	2.34	1.58	7977	7978	MS2	0/0	0	0	2ms21_2014_479_PFL_Fr1.mgf
High	A	eWFWDLATGTMk	11989	Unambiguous	Hemopexin OS=Homo sapiens GN=HPX PE=1 SV=2 - [HEMO_HUMAN]	1	1	P02790	N-Term(TMT6plex); K12(TMT6plex)	CID	1	0	1	122200	116600	101200	97080	87590	126600	Unique	Used	13095	0.001	0.012	1436	1380	2.41	0	1501000	3	648.339	1943	0	-5.3	1.58	7979	7980	MS2	0/0	0	0	2ms21_2014_479_PFL_Fr1.mgf			122200	116600	101200	97080	87590
High	A	lIccDILDVLDk	13421	Unambiguous	cDNA, FLJ79100, highly similar to 14-3-3 protein epsilon (14-3-3E) OS=Homo sapiens PE=2 SV=1 - [B7ZA86_HUMAN]	6	1	B7ZA86	N-Term(TMT6plex); C3(Carbamidomethyl); C4(Carbamidomethyl); K12(TMT6plex)	CID	1	0	1	611400	348500	275800	728700	558700	425400	Unique	Used	13096	0	0.00059	2421	2420	4.1	0	3955000	2	968.039	1935.07	0	0.26	1.58	7981	7982	MS2	0/0	0	0	2ms21_2014_479_PFL_Fr1.mgf			611400	348500	275800	728700	558700
High	A	fVTWIEGVMR	13431	Unambiguous	cDNA FLJ58778, highly similar to Plasminogen (EC 3.4.21.7) OS=Homo sapiens PE=2 SV=1 - [B4DPH4_HUMAN]	3	1	B4DPH4	N-Term(TMT6plex)	CID	1	0	1	27970	36110	29010	18040	42730	49120	Unique	Used	13097	0.004	0.121	1304	1285	2.73	0	376400	2	733.903	1466.8	0	-2.17	1.58	7984	7985	MS2	0/0	0	0	2ms21_2014_479_PFL_Fr1.mgf			27970	36110	29010	18040	42730
Middle	A	lVLLNAIYLSAk	13453	Unambiguous	Isoform 2 of Plasma protease C1 inhibitor OS=Homo sapiens GN=SERPING1 - [IC1_HUMAN]	5	1	P05155-2	N-Term(TMT6plex); K12(TMT6plex)	CID	1	0	1	47310	48420	41810	57130	44430	52480	Unique	Used	13103	0.016	0.326	605	581	2.09	0	388200	3	592.718	1776.14	0	0.46	1.58	7997	7998	MS2	0/0	0	0	2ms21_2014_479_PFL_Fr1.mgf			47310	48420	41810	57130	44430
High	A	lPGLLGNFPGPFEEEMk	13457	Unambiguous	Acid ceramidase OS=Homo sapiens GN=ASAH1 PE=1 SV=1 - [E7EMM4_HUMAN]	17	1	E7EMM4	N-Term(TMT6plex); K17(TMT6plex)	CID	1	0	1	14590	11190	21380	11710	19930	12580	Unique	Used	13104	0	0.000205	2811	2775	3.31	0	485600	3	778.429	2333.27	0	4.87	1.58	7999	8000	MS2	0/0	0	0	2ms21_2014_479_PFL_Fr1.mgf			14590	11190	21380	11710	19930
High	A	yPDLIAELLR	13499	Unambiguous	Dipeptidase 1 OS=Homo sapiens GN=DPEP1 PE=1 SV=3 - [DPEP1_HUMAN]	2	1	P16444	N-Term(TMT6plex)	CID	1	0	1	92170	58720	39480	77550	80230	58930	Unique	Used	13115	0.003	0.1	1836	1829	2.38	0	547400	2	716.427	1431.85	0	4.05	1.58	8024	8025	MS2	0/0	0	0	2ms21_2014_479_PFL_Fr1.mgf			92170	58720	39480	77550	80230
High	A	aFIQLWAFDAVk	13171	Unambiguous	Protein AMBP OS=Homo sapiens GN=AMBP PE=1 SV=1 - [AMBP_HUMAN]	1	1	P02760	N-Term(TMT6plex); K12(TMT6plex)	CID	1	0	1	16270000	12030000	9031000	23420000	7839000	16240000	Unique	Used	13120	0	0.000424	1802	1731	4.38	0	113400000	2	934.049	1867.09	0	1.32	1.6	8035	8036	MS2	0/0	0	0	2ms21_2014_479_PFL_Fr1.mgf			16270000	12030000	9031000	23420000	7839000
High	A	lTGLLDLALEk	13529	Unambiguous	Pancreatic alpha-amylase OS=Homo sapiens GN=AMY2A PE=1 SV=2 - [AMYP_HUMAN]	5	1	P04746	N-Term(TMT6plex); K11(TMT6plex)	CID	1	0	1	1226000	314100	804900	628500	912000	607000	Unique	Used	13122	0	0.00218	1396	1307	3.85	0	5976000	2	822.522	1644.04	0	1.55	1.6	8039	8040	MS2	0/0	0	0	2ms21_2014_479_PFL_Fr1.mgf			1226000	314100	804900	628500	912000
High	A	mKPLEISAVVGLIVALILAIVVWTIVGIQIk	13574	Unambiguous		0	0		N-Term(TMT6plex); M1(Oxidation); K31(TMT6plex)	CID	1	0	1							No Proteins	Not Used		0.007	0.188	68	90	0.9	0	4430	3	1258.81	3774.42	0.02	13.01	1.6	8066	8067	MS2	0/0	0	0	2ms21_2014_479_PFL_Fr1.mgf
High	A	mTVSTLVLGEGATEAEISmTSTR	8597	Unambiguous	Protein AMBP OS=Homo sapiens GN=AMBP PE=1 SV=1 - [AMBP_HUMAN]	1	1	P02760	N-Term(TMT6plex); M19(Oxidation)	CID	1	0	1	23780	22200	12900	31710	18740	40240	Unique	Used	13143	0	0.00052	2318	2315	3.62	0	1003000	3	877.115	2629.33	0	1.35	1.6	8089	8090	MS2	0/0	0	0	2ms21_2014_479_PFL_Fr1.mgf			23780	22200	12900	31710	18740
High	A	sAGWNIPIGLLYcDLPEPR	13350	Unambiguous	Transferrin variant (Fragment) OS=Homo sapiens PE=2 SV=1 - [Q53H26_HUMAN]	4	1	Q53H26	N-Term(TMT6plex); C13(Carbamidomethyl)	CID	1	0	1		641600	211400		438900	718300	No Quan Values	Not Used	13147	0	0.000114	2668	2909	3.73	0	25450000	3	800.758	2400.26	0	0.88	1.6	8098	8099	MS2	0/0	0	0	2ms21_2014_479_PFL_Fr1.mgf				641600	211400		438900
High	A	aVVFLEPQWYSVLEk	13661	Unambiguous		0	0		N-Term(TMT6plex); K15(TMT6plex)	CID	1	0	1	46480	49520	40690	47020	57860	64320	No Proteins	Not Used	13154	0	0.00228	2753	2765	4.33	0	456900	2	1133.64	2266.27	-0.01	-9.68	1.6	8113	8114	MS2	0/0	0	0	2ms21_2014_479_PFL_Fr1.mgf			46480	49520	40690	47020	57860
High	A	eQLGEFYEALDcLR	11143	Unambiguous	Alpha-1-acid glycoprotein 1 OS=Homo sapiens GN=ORM1 PE=1 SV=1 - [A1AG1_HUMAN]	1	1	P02763	N-Term(TMT6plex); C12(Carbamidomethyl)	CID	1	0	1	40370	132600	92410	42770	90610	133100	Unique	Used	13156	0	0.000261	787	748	4.4	0	924400	2	986.485	1971.96	0	-2.47	1.62	8118	8119	MS2	0/0	0	0	2ms21_2014_479_PFL_Fr1.mgf			40370	132600	92410	42770	90610
High	A	aFIQLWAFDAVk	13171	Unambiguous	Protein AMBP OS=Homo sapiens GN=AMBP PE=1 SV=1 - [AMBP_HUMAN]	1	1	P02760	N-Term(TMT6plex); K12(TMT6plex)	CID	1	0	1	2758000	2249000	1829000	4595000	1479000	3283000	Unique	Used	13159	0.001	0.008	1905	1815	2.38	0	2925000	3	623.035	1867.09	0	0.72	1.62	8125	8126	MS2	0/0	0	0	2ms21_2014_479_PFL_Fr1.mgf			2758000	2249000	1829000	4595000	1479000
High	A	aFIQLWAFDAVk	13171	Unambiguous	Protein AMBP OS=Homo sapiens GN=AMBP PE=1 SV=1 - [AMBP_HUMAN]	1	1	P02760	N-Term(TMT6plex); K12(TMT6plex)	CID	1	0	1	19050000	14830000	10070000	27580000	9427000	19910000	Unique	Used	13162	0	0.000848	1897	1814	4.74	0	137500000	2	934.048	1867.09	0	0.01	1.62	8132	8133	MS2	0/0	0	0	2ms21_2014_479_PFL_Fr1.mgf			19050000	14830000	10070000	27580000	9427000
High	A	gTEAAGAMFLEAIPMSIPPEVk	10383	Unambiguous	Alpha-1-antitrypsin OS=Homo sapiens GN=SERPINA1 PE=1 SV=3 - [A1AT_HUMAN]	2	1	P01009	N-Term(TMT6plex); K22(TMT6plex)	CID	1	0	1	22070	20350	21270	12410	23900	27060	Unique	Used	13185	0.002	0.0428	3315	3245	3.27	0	1052000	3	906.493	2717.46	0	-0.51	1.62	8188	8189	MS2	0/0	0	0	2ms21_2014_479_PFL_Fr1.mgf			22070	20350	21270	12410	23900
High	A	sAGWNIPIGLLYcDLPEPR	13350	Unambiguous	Transferrin variant (Fragment) OS=Homo sapiens PE=2 SV=1 - [Q53H26_HUMAN]	4	1	Q53H26	N-Term(TMT6plex); C13(Carbamidomethyl)	CID	1	0	1	15880	330300	125300	6749	241400	292600	Unique	Used	13196	0.001	0.0139	2688	2905	4.16	0	2208000	2	1200.64	2400.27	0	3.63	1.63	8214	8215	MS2	0/0	0	0	2ms21_2014_479_PFL_Fr1.mgf			15880	330300	125300	6749	241400
High	A	eLDSGLAESVSTLIWAAPR	13842	Unambiguous		0	0		N-Term(TMT6plex)	CID	1	0	1	14490	31180	29890	13780	30560	39770	No Proteins	Not Used	13197	0	0.00179	2251	2222	4.56	0	466100	2	1122.59	2244.18	-0.01	-11.04	1.63	8216	8217	MS2	0/0	0	0	2ms21_2014_479_PFL_Fr1.mgf			14490	31180	29890	13780	30560
High	A	dSTYSLSSTLTLSk	4222	Unambiguous	Epididymis luminal protein 213 OS=Homo sapiens GN=HEL-213 PE=2 SV=1 - [V9HW34_HUMAN]|Protein IGKV3-11 OS=Homo sapiens GN=IGKV3-11 PE=4 SV=1 - [A0A087WZW8_HUMAN]	16	2	V9HW34;A0A087WZW8	N-Term(TMT6plex); K14(TMT6plex)	CID	1	0	1	142100	97250	111600	78830	80940	127400	Not Unique	Not Used	13198	0	0.000222	2552	2534	3.22	0	770600	2	981.051	1961.09	0	5.07	1.63	8219	8220	MS2	0/0	0	0	2ms21_2014_479_PFL_Fr1.mgf			142100	97250	111600	78830	80940
High	A	aSLEDLGWADWVLSPR	13911	Unambiguous		0	0		N-Term(TMT6plex)	CID	1	0	1	28250	26780	29950	41440	45900	34380	No Proteins	Not Used	13215	0	0.000158	1968	2028	5.62	0	484900	2	1022.54	2044.07	0	-1.66	1.63	8257	8258	MS2	0/0	0	0	2ms21_2014_479_PFL_Fr1.mgf			28250	26780	29950	41440	45900
High	A	lTGLLDLALEk	13529	Unambiguous	Pancreatic alpha-amylase OS=Homo sapiens GN=AMY2A PE=1 SV=2 - [AMYP_HUMAN]	5	1	P04746	N-Term(TMT6plex); K11(TMT6plex)	CID	1	0	1	14720	6366	8272	10140	13190	7352	Unique	Used	13233	0	0.00263	1250	1172	3.75	0	297600	2	822.523	1644.04	0	2.22	1.65	8300	8301	MS2	0/0	0	0	2ms21_2014_479_PFL_Fr1.mgf			14720	6366	8272	10140	13190
High	A	lSGLLDLALGk	14133	Unambiguous		0	0		N-Term(TMT6plex); K11(TMT6plex)	CID	1	0	1	265000	135500	95350	165600	140500	69700	No Proteins	Not Used	13267	0	0.00175	753	686	4.33	0	1556000	2	779.506	1558	0	4.09	1.67	8380	8381	MS2	0/0	0	0	2ms21_2014_479_PFL_Fr1.mgf			265000	135500	95350	165600	140500
High	A	aFIQLWAFDAVk	13171	Unambiguous	Protein AMBP OS=Homo sapiens GN=AMBP PE=1 SV=1 - [AMBP_HUMAN]	1	1	P02760	N-Term(TMT6plex); K12(TMT6plex)	CID	1	0	1	2792000	2275000	1614000	4090000	1287000	3103000	Unique	Used	13269	0	0.000535	1902	1811	2.26	0	37110000	3	623.034	1867.09	0	0.23	1.67	8385	8386	MS2	0/0	0	0	2ms21_2014_479_PFL_Fr1.mgf			2792000	2275000	1614000	4090000	1287000
High	A	aFIQLWAFDAVk	13171	Unambiguous	Protein AMBP OS=Homo sapiens GN=AMBP PE=1 SV=1 - [AMBP_HUMAN]	1	1	P02760	N-Term(TMT6plex); K12(TMT6plex)	CID	1	0	1	14310000	11330000	8713000	21380000	7266000	15010000	Unique	Used	13274	0	0.000284	1856	1770	5.31	0	106600000	2	934.047	1867.09	0	-0.32	1.67	8396	8397	MS2	0/0	0	0	2ms21_2014_479_PFL_Fr1.mgf			14310000	11330000	8713000	21380000	7266000
High	A	sLPAPWLSmAPVSWITPGLk	14161	Unambiguous	Alpha-1B-glycoprotein OS=Homo sapiens GN=A1BG PE=1 SV=4 - [A1BG_HUMAN]	1	1	P04217	N-Term(TMT6plex); M9(Oxidation); K20(TMT6plex)	CID	1	0	1	3519	14150	9478	1762	7090	14710	Unique	Used	13276	0.001	0.015	2924	2624	3.29	0	105900	2	1313.25	2625.49	0	2.64	1.67	8400	8401	MS2	0/0	0	0	2ms21_2014_479_PFL_Fr1.mgf			3519	14150	9478	1762	7090
High	A	eQLGEFYEALDcLR	11143	Unambiguous	Alpha-1-acid glycoprotein 1 OS=Homo sapiens GN=ORM1 PE=1 SV=1 - [A1AG1_HUMAN]	1	1	P02763	N-Term(TMT6plex); C12(Carbamidomethyl)	CID	1	0	1	45650	133900	97990	55530	84960	146000	Unique	Used	13286	0	0.00105	706	654	4.37	0	1031000	2	986.482	1971.96	-0.01	-6.18	1.67	8425	8426	MS2	0/0	0	0	2ms21_2014_479_PFL_Fr1.mgf			45650	133900	97990	55530	84960
High	A	vENVESLAFDWISk	14245	Unambiguous	Low-density lipoprotein receptor-related protein 2 OS=Homo sapiens GN=LRP2 PE=1 SV=3 - [LRP2_HUMAN]	5	1	P98164	N-Term(TMT6plex); K14(TMT6plex)	CID	1	0	1	18410	13110	20010	19260	16910	15490	Unique	Used	13298	0	9.14e-05	2975	2828	5.3	0	358900	2	1048.08	2095.15	0	-0.19	1.67	8455	8456	MS2	0/0	0	0	2ms21_2014_479_PFL_Fr1.mgf			18410	13110	20010	19260	16910
High	A	eNYAELLEDAFLk	14314	Unambiguous	Collagen alpha-1(VI) chain OS=Homo sapiens GN=COL6A1 PE=4 SV=1 - [A0A087X0S5_HUMAN]	2	1	A0A087X0S5	N-Term(TMT6plex); K13(TMT6plex)	CID	1	0	1	67160	37590	32890	38860	47190	36680	Unique	Used	13315	0	0.000621	2293	2222	4.61	0	533700	2	1007.05	2013.09	0	-2.92	1.68	8495	8496	MS2	0/0	0	0	2ms21_2014_479_PFL_Fr1.mgf			67160	37590	32890	38860	47190
High	A	vENVESLAFDWISk	14245	Unambiguous	Low-density lipoprotein receptor-related protein 2 OS=Homo sapiens GN=LRP2 PE=1 SV=3 - [LRP2_HUMAN]	5	1	P98164	N-Term(TMT6plex); K14(TMT6plex)	CID	1	0	1	350400	370800	640300	383600	541600	404800	Unique	Used	13317	0	3.5e-05	2952	2775	5.39	0	4137000	2	1048.08	2095.15	0	2.73	1.68	8499	8500	MS2	0/0	0	0	2ms21_2014_479_PFL_Fr1.mgf			350400	370800	640300	383600	541600
High	A	vLPIEQSLSTLYQSVk	14426	Unambiguous	Isoform 5 of Prominin-1 OS=Homo sapiens GN=PROM1 - [PROM1_HUMAN]	9	1	O43490-5	N-Term(TMT6plex); K16(TMT6plex)	CID	1	0	1	33130	23830	29960	34120	23010	25110	Unique	Used	13342	0	7.71e-05	2377	2331	5.3	0	260100	2	1132.16	2263.32	-0.01	-6.72	1.7	8555	8556	MS2	0/0	0	0	2ms21_2014_479_PFL_Fr1.mgf			33130	23830	29960	34120	23010
High	A	aFIQLWAFDAVk	13171	Unambiguous	Protein AMBP OS=Homo sapiens GN=AMBP PE=1 SV=1 - [AMBP_HUMAN]	1	1	P02760	N-Term(TMT6plex); K12(TMT6plex)	CID	1	0	1	11780000	9034000	6353000	17730000	6118000	12580000	Unique	Used	13343	0	0.000138	1903	1813	4.52	0	81470000	2	934.048	1867.09	0	0.27	1.7	8558	8559	MS2	0/0	0	0	2ms21_2014_479_PFL_Fr1.mgf			11780000	9034000	6353000	17730000	6118000
High	A	mTVSTLVLGEGATEAEISMTSTR	8597	Unambiguous	Protein AMBP OS=Homo sapiens GN=AMBP PE=1 SV=1 - [AMBP_HUMAN]	1	1	P02760	N-Term(TMT6plex)	CID	1	0	1	19820	8503	14840	14880	15640	21520	Unique	Used	13348	0.001	0.0147	2509	2569	3.6	0	903800	3	871.784	2613.34	0	2.02	1.7	8569	8570	MS2	0/0	0	0	2ms21_2014_479_PFL_Fr1.mgf			19820	8503	14840	14880	15640
High	A	lTGLLDLALEk	13529	Unambiguous	Pancreatic alpha-amylase OS=Homo sapiens GN=AMY2A PE=1 SV=2 - [AMYP_HUMAN]	5	1	P04746	N-Term(TMT6plex); K11(TMT6plex)	CID	1	0	1	26070	16610	18950	24110	22980	22900	Unique	Used	13350	0.001	0.0217	1399	1339	2.78	0	471900	2	822.516	1644.02	-0.01	-6.69	1.7	8573	8574	MS2	0/0	0	0	2ms21_2014_479_PFL_Fr1.mgf			26070	16610	18950	24110	22980
High	A	aPVILGSPDDVLEFLk	14499	Unambiguous		0	0		N-Term(TMT6plex); K16(TMT6plex)	CID	1	0	1	7080	10690		7439	7213	9283	No Proteins	Not Used	13358	0.002	0.0667	2094	2033	2.26	0	123900	3	724.426	2171.26	0	-4.9	1.7	8591	8592	MS2	0/0	0	0	2ms21_2014_479_PFL_Fr1.mgf			7080	10690		7439	7213
High	A	sEFVVPDLELPSWLTTGNYR	14523	Unambiguous	Ganglioside GM2 activator OS=Homo sapiens GN=GM2A PE=1 SV=4 - [SAP3_HUMAN]	1	1	P17900	N-Term(TMT6plex)	CID	1	0	1	253600	299500	356600	558700	111900	678600	Unique	Used	13364	0.001	0.00346	2686	2753	4.08	0	5471000	2	1276.67	2552.33	0	1.73	1.7	8604	8605	MS2	0/0	0	0	2ms21_2014_479_PFL_Fr1.mgf			253600	299500	356600	558700	111900
High	A	mTVSTLVLGEGATEAEISmTSTR	8597	Unambiguous	Protein AMBP OS=Homo sapiens GN=AMBP PE=1 SV=1 - [AMBP_HUMAN]	1	1	P02760	N-Term(TMT6plex); M19(Oxidation)	CID	1	0	1					10660	16590	No Quan Values	Not Used	13375	0	0.000886	2154	2157	4.35	0	761500	3	877.112	2629.32	0	-1.72	1.7	8629	8630	MS2	0/0	0	0	2ms21_2014_479_PFL_Fr1.mgf							10660
High	A	aFLLVQDIMEDTmR	14588	Unambiguous	Macrophage colony-stimulating factor 1 (Fragment) OS=Homo sapiens GN=CSF1 PE=4 SV=1 - [E9PKP4_HUMAN]	8	1	E9PKP4	N-Term(TMT6plex); M13(Oxidation)	CID	1	0	1	17380	16580	19100	21220	11550	27000	Unique	Used	13381	0.001	0.00865	1427	1345	2.83	0	205000	3	642.999	1926.98	0	-1.53	1.72	8643	8644	MS2	0/0	0	0	2ms21_2014_479_PFL_Fr1.mgf			17380	16580	19100	21220	11550
High	A	iTEGVPQLLIVLTADR	14590	Unambiguous	Collagen alpha-3(VI) chain OS=Homo sapiens GN=COL6A3 PE=4 SV=2 - [E7ENL6_HUMAN]	5	1	E7ENL6	N-Term(TMT6plex)	CID	1	0	1	121800	110600	110600	136200	96070	136700	Unique	Used	13382	0	0.000915	1574	1524	3.75	0	1335000	2	984.09	1967.17	0	-0.84	1.72	8645	8646	MS2	0/0	0	0	2ms21_2014_479_PFL_Fr1.mgf			121800	110600	110600	136200	96070
High	A	lSGLLDLALGk	14133	Unambiguous		0	0		N-Term(TMT6plex); K11(TMT6plex)	CID	1	0	1	33080	16810	16690	24770	19540	10480	No Proteins	Not Used	13387	0.001	0.00553	823	722	2.88	0	434000	2	779.504	1558	0	1.59	1.72	8656	8657	MS2	0/0	0	0	2ms21_2014_479_PFL_Fr1.mgf			33080	16810	16690	24770	19540
High	A	aFIQLWAFDAVk	13171	Unambiguous	Protein AMBP OS=Homo sapiens GN=AMBP PE=1 SV=1 - [AMBP_HUMAN]	1	1	P02760	N-Term(TMT6plex); K12(TMT6plex)	CID	1	0	1	852500	747900	477800	1354000	461000	1029000	Unique	Used	13389	0	0.000347	1903	1814	2.28	0	12250000	3	623.035	1867.09	0	0.62	1.72	8661	8662	MS2	0/0	0	0	2ms21_2014_479_PFL_Fr1.mgf			852500	747900	477800	1354000	461000
High	A	aFIQLWAFDAVk	13171	Unambiguous	Protein AMBP OS=Homo sapiens GN=AMBP PE=1 SV=1 - [AMBP_HUMAN]	1	1	P02760	N-Term(TMT6plex); K12(TMT6plex)	CID	1	0	1	3368000	2698000	2372000	5411000	1753000	3744000	Unique	Used	13394	0	0.000696	1902	1813	5.38	0	26530000	2	934.048	1867.09	0	0.14	1.72	8672	8673	MS2	0/0	0	0	2ms21_2014_479_PFL_Fr1.mgf			3368000	2698000	2372000	5411000	1753000
High	A	aFLLVQDIMEDTmR	14588	Unambiguous	Macrophage colony-stimulating factor 1 (Fragment) OS=Homo sapiens GN=CSF1 PE=4 SV=1 - [E9PKP4_HUMAN]	8	1	E9PKP4	N-Term(TMT6plex); M13(Oxidation)	CID	1	0	1	36360	71730	30010	56270	29200	72110	Unique	Used	13399	0.001	0.00431	1465	1389	2.76	0	1056000	2	963.996	1926.99	0	-0.82	1.72	8683	8684	MS2	0/0	0	0	2ms21_2014_479_PFL_Fr1.mgf			36360	71730	30010	56270	29200
Middle	A	dNQWMIELLEDLk	14687	Unambiguous		0	0		N-Term(TMT6plex); K13(TMT6plex)	CID	1	0	1	2433	3051	3263	4131	2544	3744	No Proteins	Not Used	13406	0.045	0.576	2590	2578	1.51	0	37370	3	702.385	2105.14	0	1.9	1.72	8699	8700	MS2	0/0	0	0	2ms21_2014_479_PFL_Fr1.mgf			2433	3051	3263	4131	2544
High	A	iNVNEIFYDLVR	14692	Unambiguous		0	0		N-Term(TMT6plex)	CID	1	0	1	127300	113200	118400	130100	101600	126400	No Proteins	Not Used	13408	0.001	0.00987	1856	1843	4.04	0	1264000	2	862.479	1723.95	0	-4.48	1.72	8704	8705	MS2	0/0	0	0	2ms21_2014_479_PFL_Fr1.mgf			127300	113200	118400	130100	101600
Middle	A	nIKMYQPLLAVGTSNGSVLVYHLTSGLLHk	14826	Unambiguous		0	0		N-Term(TMT6plex); K30(TMT6plex)	CID	1	0	1						962.4	No Proteins	Not Used	13441	0.029	0.469	1715	1509	1.88	1	7992	3	1238.05	3712.13	0.01	7.82	1.73	8778	8779	MS2	0/0	0	0	2ms21_2014_479_PFL_Fr1.mgf
High	A	lAAcVNLIPQITSIYEWk	14832	Unambiguous	Protein CutA OS=Homo sapiens GN=CUTA PE=1 SV=1 - [C9IZG4_HUMAN]	4	1	C9IZG4	N-Term(TMT6plex); C4(Carbamidomethyl); K18(TMT6plex)	CID	1	0	1	26060	27130	29970	32970	15880	23430	Unique	Used	13443	0.005	0.133	3166	3055	2.84	0	688600	3	859.817	2577.44	0	-5.63	1.73	8783	8784	MS2	0/0	0	0	2ms21_2014_479_PFL_Fr1.mgf			26060	27130	29970	32970	15880
High	A	dSTYSLSSTLTLSk	4222	Unambiguous	Epididymis luminal protein 213 OS=Homo sapiens GN=HEL-213 PE=2 SV=1 - [V9HW34_HUMAN]|Protein IGKV3-11 OS=Homo sapiens GN=IGKV3-11 PE=4 SV=1 - [A0A087WZW8_HUMAN]	16	2	V9HW34;A0A087WZW8	N-Term(TMT6plex); K14(TMT6plex)	CID	1	0	1	125400	100300	111100	86100	98390	135900	Not Unique	Not Used	13446	0	0.00163	2373	2332	4.8	0	1008000	2	981.043	1961.08	0	-2.65	1.73	8789	8790	MS2	0/0	0	0	2ms21_2014_479_PFL_Fr1.mgf			125400	100300	111100	86100	98390
High	A	qYmPWEAALSSLSYFk	14870	Unambiguous	Aminopeptidase N OS=Homo sapiens GN=ANPEP PE=1 SV=4 - [AMPN_HUMAN]	3	1	P15144	N-Term(TMT6plex); M3(Oxidation); K16(TMT6plex)	CID	1	0	1	7168	12700	11860	8389	14130	14620	Unique	Used	13453	0.001	0.00693	2265	2264	3.2	0	554500	3	799.084	2395.24	0	-0.92	1.73	8805	8806	MS2	0/0	0	0	2ms21_2014_479_PFL_Fr1.mgf			7168	12700	11860	8389	14130
High	A	eQLGEFYEALDcLR	11143	Unambiguous	Alpha-1-acid glycoprotein 1 OS=Homo sapiens GN=ORM1 PE=1 SV=1 - [A1AG1_HUMAN]	1	1	P02763	N-Term(TMT6plex); C12(Carbamidomethyl)	CID	1	0	1	39030	116800	84270	50820	77860	132500	Unique	Used	13457	0.001	0.00761	1142	1099	3.65	0	926700	2	986.498	1971.99	0.01	10.04	1.73	8814	8815	MS2	0/0	0	0	2ms21_2014_479_PFL_Fr1.mgf			39030	116800	84270	50820	77860
High	A	sWVPHTFESELSDPVELLVAES	14923	Unambiguous	Alpha-1B-glycoprotein OS=Homo sapiens GN=A1BG PE=1 SV=4 - [A1BG_HUMAN]	1	1	P04217	N-Term(TMT6plex)	CID	1	0	1	18350	27290	24890	25010	28740	33410	Unique	Used	13467	0.001	0.0139	2171	2385	2.84	0	750000	3	900.793	2700.37	0	1.69	1.75	8839	8840	MS2	0/0	0	0	2ms21_2014_479_PFL_Fr1.mgf			18350	27290	24890	25010	28740
High	A	aFIQLWAFDAVk	13171	Unambiguous	Protein AMBP OS=Homo sapiens GN=AMBP PE=1 SV=1 - [AMBP_HUMAN]	1	1	P02760	N-Term(TMT6plex); K12(TMT6plex)	CID	1	0	1	2377000	1922000	1480000	3494000	1273000	2681000	Unique	Used	13468	0	0.000665	1886	1787	3.98	0	16910000	2	934.049	1867.09	0	1.06	1.75	8841	8842	MS2	0/0	0	0	2ms21_2014_479_PFL_Fr1.mgf			2377000	1922000	1480000	3494000	1273000
High	A	mTVSTLVLGEGATEAEISMTSTR	8597	Unambiguous	Protein AMBP OS=Homo sapiens GN=AMBP PE=1 SV=1 - [AMBP_HUMAN]	1	1	P02760	N-Term(TMT6plex)	CID	1	0	1	21640	18860	23590	26730	14060	29230	Unique	Used	13470	0	0.00168	2334	2308	3.29	0	655800	3	871.779	2613.32	0	-3.23	1.75	8846	8847	MS2	0/0	0	0	2ms21_2014_479_PFL_Fr1.mgf			21640	18860	23590	26730	14060
High	A	mTVSTLVLGEGATEAEISmTSTR	8597	Unambiguous	Protein AMBP OS=Homo sapiens GN=AMBP PE=1 SV=1 - [AMBP_HUMAN]	1	1	P02760	N-Term(TMT6plex); M19(Oxidation)	CID	1	0	1	14580	24220	28380	18750	14740	32590	Unique	Used	13496	0	0.000349	2213	2213	4.18	0	788700	3	877.113	2629.32	0	-0.74	1.75	8905	8906	MS2	0/0	0	0	2ms21_2014_479_PFL_Fr1.mgf			14580	24220	28380	18750	14740
High	A	aFIQLWAFDAVk	13171	Unambiguous	Protein AMBP OS=Homo sapiens GN=AMBP PE=1 SV=1 - [AMBP_HUMAN]	1	1	P02760	N-Term(TMT6plex); K12(TMT6plex)	CID	1	0	1	390700	307300	208200	555500	202900	355500	Unique	Used	13507	0	0.0026	1885	1809	2.24	0	5981000	3	623.034	1867.09	0	-0.16	1.77	8931	8932	MS2	0/0	0	0	2ms21_2014_479_PFL_Fr1.mgf			390700	307300	208200	555500	202900
High	A	aFIQLWAFDAVk	13171	Unambiguous	Protein AMBP OS=Homo sapiens GN=AMBP PE=1 SV=1 - [AMBP_HUMAN]	1	1	P02760	N-Term(TMT6plex); K12(TMT6plex)	CID	1	0	1	1558000	1371000	973000	2425000	915700	1855000	Unique	Used	13512	0	0.000622	1905	1815	4.91	0	7137000	2	934.048	1867.09	0	0.66	1.77	8942	8943	MS2	0/0	0	0	2ms21_2014_479_PFL_Fr1.mgf			1558000	1371000	973000	2425000	915700
Middle	A	dSGFIGQSAVEk	15141	Unambiguous		0	0		N-Term(TMT6plex); K12(TMT6plex)	CID	1	0	1	6911	13090	11930	9779	12330	18060	No Proteins	Not Used	13520	0.026	0.42	1693	1654	2.27	0	158000	2	848.466	1695.93	0	-3.9	1.77	8963	8964	MS2	0/0	0	0	2ms21_2014_479_PFL_Fr1.mgf			6911	13090	11930	9779	12330
High	A	fIcPLTGLWPINTLk	15279	Unambiguous	cDNA FLJ51265, moderately similar to Beta-2-glycoprotein 1 (Beta-2-glycoprotein I) OS=Homo sapiens PE=2 SV=1 - [B4DPN0_HUMAN]	3	1	B4DPN0	N-Term(TMT6plex); C3(Carbamidomethyl); K15(TMT6plex)	CID	1	0	1	37930	30390	20460	47670	16670	39600	Unique	Used	13553	0	8.46e-05	2656	2498	4.39	0	366900	2	1116.16	2231.31	0	1.67	1.78	9039	9040	MS2	0/0	0	0	2ms21_2014_479_PFL_Fr1.mgf			37930	30390	20460	47670	16670
High	A	vPEGLEDVSkYPDLIAELLR	15312	Unambiguous	Dipeptidase 1 OS=Homo sapiens GN=DPEP1 PE=1 SV=3 - [DPEP1_HUMAN]	2	1	P16444	N-Term(TMT6plex); K10(TMT6plex)	CID	1	0	1	145700	63890	115600	94280	100600	93400	Unique	Used	13561	0	0.000424	2661	2653	4.08	1	1257000	3	905.517	2714.54	0	-0.87	1.78	9060	9061	MS2	0/0	0	0	2ms21_2014_479_PFL_Fr1.mgf			145700	63890	115600	94280	100600
High	A	dSTYSLSSTLTLSk	4222	Unambiguous	Epididymis luminal protein 213 OS=Homo sapiens GN=HEL-213 PE=2 SV=1 - [V9HW34_HUMAN]|Protein IGKV3-11 OS=Homo sapiens GN=IGKV3-11 PE=4 SV=1 - [A0A087WZW8_HUMAN]	16	2	V9HW34;A0A087WZW8	N-Term(TMT6plex); K14(TMT6plex)	CID	1	0	1	105600	75680	99500	70540	71840	118800	Not Unique	Not Used	13563	0	0.000904	2353	2310	4.96	0	815000	2	981.044	1961.08	0	-1.96	1.78	9064	9065	MS2	0/0	0	0	2ms21_2014_479_PFL_Fr1.mgf			105600	75680	99500	70540	71840
High	A	dVSSELAEFFLEEVTPAQGGSYR	15392	Unambiguous		0	0		N-Term(TMT6plex)	CID	1	0	1	15980	13820	14980	16770	15370	11340	No Proteins	Not Used	13579	0	0.00328	1705	1751	5.68	0	278600	2	1380.68	2760.36	0	0.73	1.8	9103	9104	MS2	0/0	0	0	2ms21_2014_479_PFL_Fr1.mgf			15980	13820	14980	16770	15370
High	A	mTVSTLVLGEGATEAEISMTSTR	8597	Unambiguous	Protein AMBP OS=Homo sapiens GN=AMBP PE=1 SV=1 - [AMBP_HUMAN]	1	1	P02760	N-Term(TMT6plex)	CID	1	0	1	30600	23050	32650	21240	23660	41900	Unique	Used	13584	0	2.34e-05	2484	2548	4.72	0	803700	3	871.782	2613.33	0	0.41	1.8	9114	9115	MS2	0/0	0	0	2ms21_2014_479_PFL_Fr1.mgf			30600	23050	32650	21240	23660
Middle	A	fLNMMk	15430	Unambiguous		0	0		N-Term(TMT6plex); K6(TMT6plex)	CID	1	0	1	7637	14350	6109	8427	8383	12850	No Proteins	Not Used	13590	0.029	0.456	854	895	0.99	0	91940	2	621.36	1241.71	0	-1.91	1.8	9130	9131	MS2	0/0	0	0	2ms21_2014_479_PFL_Fr1.mgf			7637	14350	6109	8427	8383
Middle	A	mYLGYEYVTAIR	5987	Unambiguous	Transferrin variant (Fragment) OS=Homo sapiens PE=2 SV=1 - [Q53H26_HUMAN]	6	1	Q53H26	N-Term(TMT6plex)	CID	1	0	1	14730	15550	13160	16500	12040	23170	Unique	Used	13597	0.012	0.236	1428	1498	1.72	0	493700	2	854.454	1707.9	0	1.41	1.8	9146	9147	MS2	0/0	0	0	2ms21_2014_479_PFL_Fr1.mgf			14730	15550	13160	16500	12040
High	A	lLVLDLFAESQPVYTR	15459	Unambiguous	Alpha-N-acetylglucosaminidase OS=Homo sapiens GN=ufHSD2 PE=4 SV=1 - [Q14769_HUMAN]	2	1	Q14769	N-Term(TMT6plex)	CID	1	0	1	11190	20880	12810	9569	15550	21910	Unique	Used	13598	0.001	0.00596	2573	2383	3.57	0	203700	2	1047.1	2093.2	0.01	8	1.8	9148	9149	MS2	0/0	0	0	2ms21_2014_479_PFL_Fr1.mgf			11190	20880	12810	9569	15550
High	A	aQGFTEDTIVFLPQTDk	5298	Unambiguous	Prostaglandin-H2 D-isomerase OS=Homo sapiens GN=PTGDS PE=1 SV=1 - [PTGDS_HUMAN]	2	1	P41222	N-Term(TMT6plex); K17(TMT6plex)	CID	1	0	1	33040	214100	100600	30810	191900	201000	Unique	Used	13599	0.005	0.162	2878	2945	1.98	0	1377000	3	790.096	2368.27	0	-3.12	1.8	9151	9152	MS2	0/0	0	0	2ms21_2014_479_PFL_Fr1.mgf			33040	214100	100600	30810	191900
High	A	gVYSSDVFDIFPGTYQTLEMFPR	15482	Unambiguous	cDNA FLJ76826, highly similar to Homo sapiens ceruloplasmin (ferroxidase) (CP), mRNA OS=Homo sapiens PE=2 SV=1 - [A8K5A4_HUMAN]	2	1	A8K5A4	N-Term(TMT6plex)	CID	1	0	1	12100	31950	20150	16570	21510	30340	Unique	Used	13603	0	1.19e-05	1749	1738	4.98	0	499400	3	966.815	2898.43	0	2.39	1.8	9160	9161	MS2	0/0	0	0	2ms21_2014_479_PFL_Fr1.mgf			12100	31950	20150	16570	21510
Middle	A	lcYVALDFENEmATAASSSSLEk	3491	Unambiguous	cDNA FLJ32030 fis, clone NTONG2000040, highly similar to Actin, alpha cardiac OS=Homo sapiens PE=2 SV=1 - [B3KPP5_HUMAN]	13	1	B3KPP5	N-Term(TMT6plex); C2(Carbamidomethyl); M12(Oxidation); K23(TMT6plex)	CID	1	0	1							No Quan Values	Not Used	13605	0.013	0.255	2372	2465	3.23	0	40280	3	1004.18	3010.51	0.01	11.2	1.8	9164	9165	MS2	0/0	0	0	2ms21_2014_479_PFL_Fr1.mgf
High	A	mTVSTLVLGEGATEAEISmTSTR	8597	Unambiguous	Protein AMBP OS=Homo sapiens GN=AMBP PE=1 SV=1 - [AMBP_HUMAN]	1	1	P02760	N-Term(TMT6plex); M19(Oxidation)	CID	1	0	1	10590	22620	19890	10720	18100	31710	Unique	Used	13606	0	0.000223	2168	2177	4.77	0	2404000	3	877.112	2629.32	0	-1.3	1.8	9167	9168	MS2	0/0	0	0	2ms21_2014_479_PFL_Fr1.mgf			10590	22620	19890	10720	18100
High	A	xIEPDTDAPQEMGDENAEITEEmMDQANDk	15500	Unconsidered		0	0		X1(L); N-Term(TMT6plex); M23(Oxidation); K30(TMT6plex)	CID	1	0	1	43040	55130	49840	15700	6041	190200	No Proteins	Not Used	13608	0.005	0.145	345	350	1.93	0	950400	3	1285.25	3853.72	0	-3.15	1.8	9171	9172	MS2	0/0	0	0	2ms21_2014_479_PFL_Fr1.mgf			43040	55130	49840	15700	6041
High	A	xIEPDTDAPQEMGDENAEITEEMmDQANDk	15500	Unconsidered		0	0		X1(L); N-Term(TMT6plex); M24(Oxidation); K30(TMT6plex)	CID	1	0	1	43040	55130	49840	15700	6041	190200	No Proteins	Not Used	13608	0.004	0.126	345	350	1.93	0	950400	3	1285.25	3853.72	0	-3.15	1.8	9171	9172	MS2	0/0	0	0	2ms21_2014_479_PFL_Fr1.mgf			43040	55130	49840	15700	6041
High	A	aFIQLWAFDAVk	13171	Unambiguous	Protein AMBP OS=Homo sapiens GN=AMBP PE=1 SV=1 - [AMBP_HUMAN]	1	1	P02760	N-Term(TMT6plex); K12(TMT6plex)	CID	1	0	1	705600	603000	443700	1067000	381200	816500	Unique	Used	13623	0	0.00047	1904	1820	4.94	0	5528000	2	934.047	1867.09	0	-0.91	1.82	9205	9206	MS2	0/0	0	0	2ms21_2014_479_PFL_Fr1.mgf			705600	603000	443700	1067000	381200
High	A	ycGQLQmIQEQISNLEAQITDVR	15616	Unambiguous		0	0		N-Term(TMT6plex); C2(Carbamidomethyl); M7(Oxidation)	CID	1	0	1	7626	13730	9545	8143	11250	12730	No Proteins	Not Used	13636	0.001	0.0194	2015	2088	3.42	0	374300	3	994.831	2982.48	0	-3.02	1.82	9234	9235	MS2	0/0	0	0	2ms21_2014_479_PFL_Fr1.mgf			7626	13730	9545	8143	11250
High	A	qLPSFQTFFAPALDVIR	15627	Unambiguous	Endothelial cell-selective adhesion molecule OS=Homo sapiens GN=ESAM PE=4 SV=1 - [F8WDW9_HUMAN]	2	1	F8WDW9	N-Term(TMT6plex)	CID	1	0	1	42450	28910	26280	42060	16990	33190	Unique	Used	13639	0	0.000395	2663	2528	4.65	0	432000	2	1090.11	2179.21	0	-1.08	1.82	9241	9242	MS2	0/0	0	0	2ms21_2014_479_PFL_Fr1.mgf			42450	28910	26280	42060	16990
High	A	mTVSTLVLGEGATEAEISMTSTR	8597	Unambiguous	Protein AMBP OS=Homo sapiens GN=AMBP PE=1 SV=1 - [AMBP_HUMAN]	1	1	P02760	N-Term(TMT6plex); M1(Oxidation)	CID	0.0277	0	1	6440	7235	6761	8432	5813	6710	Unique	Used	13666	0.001	0.00365	2279	2305	3.61	0	146900	2	1315.17	2629.33	0	2.28	1.83	9309	9310	MS2	0/0	0	0	2ms21_2014_479_PFL_Fr1.mgf			6440	7235	6761	8432	5813
High	A	qPNcDDPETEEAALVAIDYINQDLPWGYk	15794	Unambiguous		0	0		N-Term(TMT6plex); C4(Carbamidomethyl); K29(TMT6plex)	CID	1	0	1							No Proteins	Not Used	13679	0.001	0.00964	2323	2403	3.98	0	52630	3	1274.96	3822.88	0.01	5.9	1.83	9340	9341	MS2	0/0	0	0	2ms21_2014_479_PFL_Fr1.mgf
High	A	eQLGEFYEALDcLR	11143	Unambiguous	Alpha-1-acid glycoprotein 1 OS=Homo sapiens GN=ORM1 PE=1 SV=1 - [A1AG1_HUMAN]	1	1	P02763	N-Term(TMT6plex); C12(Carbamidomethyl)	CID	1	0	1	24900	64350	41940	24340	42210	72560	Unique	Used	13687	0	0.00187	728	696	3.78	0	635000	2	986.483	1971.96	0	-5.01	1.85	9357	9358	MS2	0/0	0	0	2ms21_2014_479_PFL_Fr1.mgf			24900	64350	41940	24340	42210
High	A	mTVSTLVLGEGATEAEISMTSTR	8597	Unambiguous	Protein AMBP OS=Homo sapiens GN=AMBP PE=1 SV=1 - [AMBP_HUMAN]	1	1	P02760	N-Term(TMT6plex)	CID	1	0	1	18280	15500	19210	21800	13240	23470	Unique	Used	13693	0.001	0.00351	2511	2571	3.73	0	546100	3	871.784	2613.34	0	1.95	1.85	9372	9373	MS2	0/0	0	0	2ms21_2014_479_PFL_Fr1.mgf			18280	15500	19210	21800	13240
High	A	tLGALESLTLNLAQLTAR	15870	Unambiguous		0	0		N-Term(TMT6plex)	CID	1	0	1		3308	3572	2597	2491	4589	No Proteins	Not Used	13696	0.002	0.0589	1925	1874	2.21	0	64160	3	705.422	2114.25	0	6.55	1.85	9378	9379	MS2	0/0	0	0	2ms21_2014_479_PFL_Fr1.mgf				3308	3572	2597	2491
High	A	tLGALESLTLNLAQLTAR	15870	Unambiguous		0	0		N-Term(TMT6plex)	CID	1	0	1	68990	25200	20030	88800	39060	44720	No Proteins	Not Used	13701	0	4.77e-05	2201	2014	6.07	0	569000	2	1057.62	2114.23	0	-4.04	1.85	9390	9391	MS2	0/0	0	0	2ms21_2014_479_PFL_Fr1.mgf			68990	25200	20030	88800	39060
High	A	mTVSTLVLGEGATEAEISmTSTR	8597	Unambiguous	Protein AMBP OS=Homo sapiens GN=AMBP PE=1 SV=1 - [AMBP_HUMAN]	1	1	P02760	N-Term(TMT6plex); M19(Oxidation)	CID	1	0	1	7510	23610	16990	10200	6348	24680	Unique	Used	13717	0	0.00309	2276	2284	3.11	0	368900	3	877.114	2629.33	0	0.51	1.85	9427	9428	MS2	0/0	0	0	2ms21_2014_479_PFL_Fr1.mgf			7510	23610	16990	10200	6348
High	A	aQGFTEDTIVFLPQTDk	5298	Unambiguous	Prostaglandin-H2 D-isomerase OS=Homo sapiens GN=PTGDS PE=1 SV=1 - [PTGDS_HUMAN]	2	1	P41222	N-Term(TMT6plex); K17(TMT6plex)	CID	1	0	1	17760	86500	50210	23240	85700	83290	Unique	Used	13719	0.001	0.0253	2915	3002	3.05	0	758000	3	790.097	2368.28	0	-1.65	1.87	9432	9433	MS2	0/0	0	0	2ms21_2014_479_PFL_Fr1.mgf			17760	86500	50210	23240	85700
High	A	vLPDPEVISDLVFLk	7204	Unambiguous		0	0		N-Term(TMT6plex); K15(TMT6plex)	CID	1	0	1	101900	59250	52700	90170	49630	67410	No Proteins	Not Used	13725	0.001	0.00469	1588	1548	3.85	0	615700	2	1071.65	2142.29	0	1.28	1.87	9445	9446	MS2	0/0	0	0	2ms21_2014_479_PFL_Fr1.mgf			101900	59250	52700	90170	49630
High	A	nALTGLPPGLFQASATLDTLVLk	16035	Unambiguous	Leucine-rich alpha-2-glycoprotein OS=Homo sapiens GN=LRG1 PE=1 SV=2 - [A2GL_HUMAN]	1	1	P02750	N-Term(TMT6plex); K23(TMT6plex)	CID	1	0	1	177000	154700	142100	244000	120800	256500	Unique	Used	13734	0.002	0.0868	1318	1349	2.12	0	2764000	3	933.553	2798.64	0	0.19	1.87	9466	9467	MS2	0/0	0	0	2ms21_2014_479_PFL_Fr1.mgf			177000	154700	142100	244000	120800
High	A	vLPDPEVISDLVFLk	7204	Unambiguous		0	0		N-Term(TMT6plex); K15(TMT6plex)	CID	1	0	1	211500	123400	129200	208700	134100	147800	No Proteins	Not Used	13736	0.001	0.00915	1588	1548	2.79	0	1368000	2	1071.65	2142.29	0	1.39	1.87	9471	9472	MS2	0/0	0	0	2ms21_2014_479_PFL_Fr1.mgf			211500	123400	129200	208700	134100
High	A	eDLIWELLNQAQEHFGk	16108	Unambiguous	Transferrin variant (Fragment) OS=Homo sapiens PE=2 SV=1 - [Q53H26_HUMAN]	6	1	Q53H26	N-Term(TMT6plex); K17(TMT6plex)	CID	1	0	1	20830	438100	133100	29270	357800	308700	Unique	Used	13749	0	2.32e-06	3256	3276	6.55	0	3766000	3	843.457	2528.36	0	0.67	1.87	9501	9502	MS2	0/0	0	0	2ms21_2014_479_PFL_Fr1.mgf			20830	438100	133100	29270	357800
Middle	A	fFPFGLVQLSSDLSk	16141	Unambiguous		0	0		N-Term(TMT6plex); K15(TMT6plex)	CID	1	0	1	13060	28690	19170	13580	10670	39810	No Proteins	Not Used	13757	0.021	0.386	2347	2376	1.9	0	203000	3	715.078	2143.22	0	0.23	1.88	9520	9521	MS2	0/0	0	0	2ms21_2014_479_PFL_Fr1.mgf			13060	28690	19170	13580	10670
High	A	sLPAPWLSMAPVSWITPGLk	14161	Unambiguous	Alpha-1B-glycoprotein OS=Homo sapiens GN=A1BG PE=1 SV=4 - [A1BG_HUMAN]	1	1	P04217	N-Term(TMT6plex); K20(TMT6plex)	CID	1	0	1	4219	6629	5313	3505	7984	14130	Unique	Used	13758	0	0.000115	2585	2485	4	0	287100	3	870.502	2609.49	0	-0.61	1.88	9522	9523	MS2	0/0	0	0	2ms21_2014_479_PFL_Fr1.mgf			4219	6629	5313	3505	7984
Middle	A	eDIFMETLk	7505	Unambiguous	Zinc-alpha-2-glycoprotein OS=Homo sapiens GN=AZGP1 PE=1 SV=2 - [ZA2G_HUMAN]	1	1	P25311	N-Term(TMT6plex); K9(TMT6plex)	CID	1	0	1	8617	10050	5251	5223	6404	13600	Unique	Used	13765	0.029	0.462	1434	1386	1.31	0	165800	2	792.433	1583.86	-0.01	-11.12	1.88	9539	9540	MS2	0/0	0	0	2ms21_2014_479_PFL_Fr1.mgf			8617	10050	5251	5223	6404
High	A	mTVSTLVLGEGATEAEISmTSTR	8597	Unambiguous	Protein AMBP OS=Homo sapiens GN=AMBP PE=1 SV=1 - [AMBP_HUMAN]	1	1	P02760	N-Term(TMT6plex); M19(Oxidation)	CID	1	0	1	8767	9999	10300	14550	9262	10340	Unique	Used	13777	0.001	0.00604	2397	2398	3.31	0	120700	2	1315.17	2629.34	0.01	4.23	1.88	9570	9571	MS2	0/0	0	0	2ms21_2014_479_PFL_Fr1.mgf			8767	9999	10300	14550	9262
High	A	mTVSTLVLGEGATEAEISmTSTR	8597	Unambiguous	Protein AMBP OS=Homo sapiens GN=AMBP PE=1 SV=1 - [AMBP_HUMAN]	1	1	P02760	N-Term(TMT6plex); M19(Oxidation)	CID	1	0	1	8115	8547	4426	6031	7671	10820	Unique	Used	13790	0.002	0.0464	2261	2253	2.58	0	564400	3	877.114	2629.33	0	0.16	1.9	9599	9600	MS2	0/0	0	0	2ms21_2014_479_PFL_Fr1.mgf			8115	8547	4426	6031	7671
High	A	dLATALEQLLQAYPR	16320	Unambiguous		0	0		N-Term(TMT6plex)	CID	1	0	1	8789	13030	7848	7996	9492	9650	No Proteins	Not Used	13801	0.001	0.0201	2394	2461	2.27	0	118700	3	644.367	1931.09	0	3.24	1.9	9627	9628	MS2	0/0	0	0	2ms21_2014_479_PFL_Fr1.mgf			8789	13030	7848	7996	9492
High	A	mTVSTLVLGEGATEAEISMTSTR	8597	Unambiguous	Protein AMBP OS=Homo sapiens GN=AMBP PE=1 SV=1 - [AMBP_HUMAN]	1	1	P02760	N-Term(TMT6plex)	CID	1	0	1	25460	16730	17660	21910	18810	29000	Unique	Used	13803	0	0.00039	2452	2495	3.86	0	564700	3	871.781	2613.33	0	-0.57	1.9	9632	9633	MS2	0/0	0	0	2ms21_2014_479_PFL_Fr1.mgf			25460	16730	17660	21910	18810
High	A	aQGFTEDTIVFLPQTDk	5298	Unambiguous	Prostaglandin-H2 D-isomerase OS=Homo sapiens GN=PTGDS PE=1 SV=1 - [PTGDS_HUMAN]	2	1	P41222	N-Term(TMT6plex); K17(TMT6plex)	CID	1	0	1	10160	8666	7551	9445	5113	9554	Unique	Used	13807	0	0.00083	2900	2934	4.64	0	137500	2	1184.65	2368.3	0.01	8.22	1.9	9641	9642	MS2	0/0	0	0	2ms21_2014_479_PFL_Fr1.mgf			10160	8666	7551	9445	5113
High	A	eQLGEFYEALDcLR	11143	Unambiguous	Alpha-1-acid glycoprotein 1 OS=Homo sapiens GN=ORM1 PE=1 SV=1 - [A1AG1_HUMAN]	1	1	P02763	N-Term(TMT6plex); C12(Carbamidomethyl)	CID	1	0	1	29220	79350	55310	29260	52670	79330	Unique	Used	13811	0	0.000971	811	781	3.95	0	674700	2	986.487	1971.97	0	-0.61	1.9	9651	9652	MS2	0/0	0	0	2ms21_2014_479_PFL_Fr1.mgf			29220	79350	55310	29260	52670
High	A	mTVSTLVLGEGATEAEISmTSTR	8597	Unambiguous	Protein AMBP OS=Homo sapiens GN=AMBP PE=1 SV=1 - [AMBP_HUMAN]	1	1	P02760	N-Term(TMT6plex); M19(Oxidation)	CID	1	0	1	9449	17500	12750	12270	15030	10520	Unique	Used	13827	0.001	0.0146	2260	2249	3.33	0	355500	3	877.113	2629.33	0	-0.19	1.92	9688	9689	MS2	0/0	0	0	2ms21_2014_479_PFL_Fr1.mgf			9449	17500	12750	12270	15030
High	A	aQGFTEDTIVFLPQTDk	5298	Unambiguous	Prostaglandin-H2 D-isomerase OS=Homo sapiens GN=PTGDS PE=1 SV=1 - [PTGDS_HUMAN]	2	1	P41222	N-Term(TMT6plex); K17(TMT6plex)	CID	1	0	1	19290	25490	21260	11600	17980	25340	Unique	Used	13830	0.002	0.0375	2989	3058	2.99	0	566800	3	790.1	2368.29	0	2.06	1.92	9695	9696	MS2	0/0	0	0	2ms21_2014_479_PFL_Fr1.mgf			19290	25490	21260	11600	17980
High	A	gPQLLALVEEVLPR	16482	Unambiguous		0	0		N-Term(TMT6plex)	CID	1	0	1	19030	13490	11660	17290	16080	15370	No Proteins	Not Used	13841	0	0.000735	1807	1728	5.43	0	256000	2	882.037	1763.07	0	1.73	1.92	9721	9722	MS2	0/0	0	0	2ms21_2014_479_PFL_Fr1.mgf			19030	13490	11660	17290	16080
High	A	aFIQLWAFDAVk	13171	Unambiguous	Protein AMBP OS=Homo sapiens GN=AMBP PE=1 SV=1 - [AMBP_HUMAN]	1	1	P02760	N-Term(TMT6plex); K12(TMT6plex)	CID	1	0	1	410900	694100	513600	576000	431800	845200	Unique	Used	13843	0	0.000945	1794	1724	4.14	0	4690000	2	934.05	1867.09	0	2.38	1.92	9726	9727	MS2	0/0	0	0	2ms21_2014_479_PFL_Fr1.mgf			410900	694100	513600	576000	431800
High	A	ycVQLSQIQAQISALEEQLQQIR	16499	Unambiguous	Keratin, type I cytoskeletal 10 OS=Homo sapiens GN=KRT10 PE=1 SV=6 - [K1C10_HUMAN]	1	1	P13645	N-Term(TMT6plex); C2(Carbamidomethyl)	CID	1	0	1	7131	9471	10590	6906	13280	12790	Unique	Used	13844	0	1.98e-05	3608	3768	5.47	0	503000	3	992.535	2975.59	0	2.6	1.92	9728	9729	MS2	0/0	0	0	2ms21_2014_479_PFL_Fr1.mgf			7131	9471	10590	6906	13280
High	A	gPQLLALVEEVLPR	16482	Unambiguous		0	0		N-Term(TMT6plex)	CID	1	0	1		1496				1429	No Proteins	Not Used	13846	0.001	0.0196	1781	1699	1.65	0	49450	3	588.36	1763.07	0	2.03	1.92	9732	9733	MS2	0/0	0	0	2ms21_2014_479_PFL_Fr1.mgf				1496
High	A	gIAVDPTVGYLFFSDWESLSGEPk	16538	Unambiguous	Low-density lipoprotein receptor-related protein 2 OS=Homo sapiens GN=LRP2 PE=1 SV=3 - [LRP2_HUMAN]	3	1	P98164	N-Term(TMT6plex); K24(TMT6plex)	CID	1	0	1	3919	6352	10650	6357	6951	6583	Unique	Used	13854	0.007	0.187	3397	3401	3.44	0	66030	2	1536.79	3072.57	-0.01	-9.11	1.92	9752	9753	MS2	0/0	0	0	2ms21_2014_479_PFL_Fr1.mgf			3919	6352	10650	6357	6951
High	A	aFIQLWAFDAVk	13171	Unambiguous	Protein AMBP OS=Homo sapiens GN=AMBP PE=1 SV=1 - [AMBP_HUMAN]	1	1	P02760	N-Term(TMT6plex); K12(TMT6plex)	CID	1	0	1	239600	216000	168400	367400	137600	294600	Unique	Used	13865	0	0.00126	1741	1675	4.38	0	1892000	2	934.051	1867.09	0	3.48	1.93	9779	9780	MS2	0/0	0	0	2ms21_2014_479_PFL_Fr1.mgf			239600	216000	168400	367400	137600
High	A	dYNLNDILLQLGIEEAFTSk	16618	Unambiguous	Alpha-1-antichymotrypsin OS=Homo sapiens GN=SERPINA3 PE=1 SV=2 - [AACT_HUMAN]	3	1	P01011	N-Term(TMT6plex); K20(TMT6plex)	CID	1	0	1	21840	56980	139500	22060	22640	60200	Unique	Used	13873	0.001	0.0201	3830	3450	3.12	0	624800	3	918.837	2754.5	0	-0.11	1.93	9801	9802	MS2	0/0	0	0	2ms21_2014_479_PFL_Fr1.mgf			21840	56980	139500	22060	22640
High	A	vLTILEQIPGMVVVADk	16694	Unambiguous	Putative phospholipase B-like 2 OS=Homo sapiens GN=PLBD2 PE=1 SV=2 - [PLBL2_HUMAN]	1	1	Q8NHP8	N-Term(TMT6plex); K17(TMT6plex)	CID	1	0	1	4330	8032	8149	5749	5325	8174	Unique	Used	13893	0	0.000648	1198	1127	4.22	0	103000	2	1142.19	2283.38	0	2.12	1.95	9852	9853	MS2	0/0	0	0	2ms21_2014_479_PFL_Fr1.mgf			4330	8032	8149	5749	5325
High	A	mTVSTLVLGEGATEAEISMTSTR	8597	Unambiguous	Protein AMBP OS=Homo sapiens GN=AMBP PE=1 SV=1 - [AMBP_HUMAN]	1	1	P02760	N-Term(TMT6plex)	CID	1	0	1	10200	10040	12650	13210	5855	16180	Unique	Used	13902	0	7.29e-06	2460	2501	4.63	0	477500	3	871.782	2613.33	0	-0.22	1.95	9874	9875	MS2	0/0	0	0	2ms21_2014_479_PFL_Fr1.mgf			10200	10040	12650	13210	5855
High	A	aQGFTEDTIVFLPQTDk	5298	Unambiguous	Prostaglandin-H2 D-isomerase OS=Homo sapiens GN=PTGDS PE=1 SV=1 - [PTGDS_HUMAN]	2	1	P41222	N-Term(TMT6plex); K17(TMT6plex)	CID	1	0	1	10230	11990	12640	12620	8084	13300	Unique	Used	13916	0	0.000586	2872	2945	3.93	0	156300	2	1184.64	2368.27	0	-3.01	1.95	9908	9909	MS2	0/0	0	0	2ms21_2014_479_PFL_Fr1.mgf			10230	11990	12640	12620	8084
High	A	mTVSTLVLGEGATEAEISmTSTR	8597	Unambiguous	Protein AMBP OS=Homo sapiens GN=AMBP PE=1 SV=1 - [AMBP_HUMAN]	1	1	P02760	N-Term(TMT6plex); M19(Oxidation)	CID	1	0	1	8929	11020	4932	11940	6216	12390	Unique	Used	13922	0	0.00068	2167	2175	4.46	0	308100	3	877.113	2629.32	0	-1.23	1.97	9924	9925	MS2	0/0	0	0	2ms21_2014_479_PFL_Fr1.mgf			8929	11020	4932	11940	6216
High	A	aFIQLWAFDAVk	13171	Unambiguous	Protein AMBP OS=Homo sapiens GN=AMBP PE=1 SV=1 - [AMBP_HUMAN]	1	1	P02760	N-Term(TMT6plex); K12(TMT6plex)	CID	1	0	1	267700	246400	191100	374500	163200	337500	Unique	Used	13938	0	0.000734	1885	1809	4.74	0	2104000	2	934.048	1867.09	0	-0.19	1.97	9960	9961	MS2	0/0	0	0	2ms21_2014_479_PFL_Fr1.mgf			267700	246400	191100	374500	163200
High	A	mTVSTLVLGEGATEAEISMTSTR	8597	Unambiguous	Protein AMBP OS=Homo sapiens GN=AMBP PE=1 SV=1 - [AMBP_HUMAN]	1	1	P02760	N-Term(TMT6plex)	CID	1	0	1	9060	11820	16930	18010	7594	13390	Unique	Used	13991	0	5.4e-05	2526	2578	4.88	0	372400	3	871.784	2613.34	0	2.66	2	10104	10105	MS2	0/0	0	0	2ms21_2014_479_PFL_Fr1.mgf			9060	11820	16930	18010	7594
High	A	aDLEMQIESLTEELAYLk	17095	Unambiguous	Keratin, type I cytoskeletal 10 OS=Homo sapiens GN=KRT10 PE=1 SV=6 - [K1C10_HUMAN]	1	1	P13645	N-Term(TMT6plex); K18(TMT6plex)	CID	1	0	1	9600	10240	6975	7137	5569	10470	Unique	Used	13999	0	0.00171	3123	3222	4.26	0	107000	2	1277.68	2554.36	-0.01	-5.02	2	10127	10128	MS2	0/0	0	0	2ms21_2014_479_PFL_Fr1.mgf			9600	10240	6975	7137	5569
Middle	A	vPTVEPLDSLTLFLFR	17136	Unambiguous	Intercellular adhesion molecule 2 (Fragment) OS=Homo sapiens GN=ICAM2 PE=4 SV=3 - [J3QQR8_HUMAN]	8	1	J3QQR8	N-Term(TMT6plex)	CID	1	0	1		2610	2040	4025	2627	2160	No Quan Values	Not Used	14008	0.012	0.204	2898	2743	2.73	0	54910	3	692.737	2076.2	0	0.75	2.02	10148	10149	MS2	0/0	0	0	2ms21_2014_479_PFL_Fr1.mgf				2610	2040	4025	2627
High	A	mTVSTLVLGEGATEAEISmTSTR	8597	Unambiguous	Protein AMBP OS=Homo sapiens GN=AMBP PE=1 SV=1 - [AMBP_HUMAN]	1	1	P02760	N-Term(TMT6plex); M19(Oxidation)	CID	1	0	1	6995			7738	6943	8776	Unique	Used	14010	0.001	0.0043	2248	2242	3.8	0	252200	3	877.113	2629.33	0	-0.26	2.02	10153	10154	MS2	0/0	0	0	2ms21_2014_479_PFL_Fr1.mgf			6995			7738	6943
High	A	aFIQLWAFDAVk	13171	Unambiguous	Protein AMBP OS=Homo sapiens GN=AMBP PE=1 SV=1 - [AMBP_HUMAN]	1	1	P02760	N-Term(TMT6plex); K12(TMT6plex)	CID	1	0	1	202500	188700	133200	296800	125600	231400	Unique	Used	14025	0	0.000401	1820	1748	4.87	0	1602000	2	934.049	1867.09	0	1.19	2.02	10187	10188	MS2	0/0	0	0	2ms21_2014_479_PFL_Fr1.mgf			202500	188700	133200	296800	125600
High	A	lFLEALVDSVAQGIPFQQHQFDk	17205	Unambiguous	Alpha-N-acetylglucosaminidase OS=Homo sapiens GN=ufHSD2 PE=4 SV=1 - [Q14769_HUMAN]	2	1	Q14769	N-Term(TMT6plex); K23(TMT6plex)	CID	1	0	1							No Quan Values	Not Used	14026	0	0.00267	3479	3192	3.95	0	22430	3	1030.24	3088.7	0	4.56	2.02	10190	10191	MS2	0/0	0	0	2ms21_2014_479_PFL_Fr1.mgf
Middle	A	eIVDSYLPVILDIIk	17236	Unambiguous	cDNA FLJ54596, highly similar to Proactivator polypeptide OS=Homo sapiens PE=2 SV=1 - [B4DEK5_HUMAN]	9	1	B4DEK5	N-Term(TMT6plex); K15(TMT6plex)	CID	1	0	1	2586		2717	3801	1550	2012	Unique	Used	14034	0.048	0.6	1639	1673	1.57	0	35420	3	730.111	2188.32	0	-2.43	2.02	10211	10212	MS2	0/0	0	0	2ms21_2014_479_PFL_Fr1.mgf			2586		2717	3801	1550
High	A	dAEEAISQTIDTIVDmIk	17252	Unambiguous	Collagen alpha-1(VI) chain OS=Homo sapiens GN=COL6A1 PE=4 SV=1 - [A0A087X0S5_HUMAN]	2	1	A0A087X0S5	N-Term(TMT6plex); M16(Oxidation); K18(TMT6plex)	CID	1	0	1	13020	9686	11150	11590	11820	11250	Unique	Used	14038	0	0.00011	2871	3070	3.92	0	474400	3	822.776	2466.31	0	2.96	2.02	10222	10223	MS2	0/0	0	0	2ms21_2014_479_PFL_Fr1.mgf			13020	9686	11150	11590	11820
Middle	A	aTIADLILSALER	17269	Unambiguous		0	0		N-Term(TMT6plex)	CID	1	0	1							No Proteins	Not Used	14043	0.03	0.475	1636	1594	1.66	0	20090	3	538.994	1614.97	0	2.76	2.03	10233	10234	MS2	0/0	0	0	2ms21_2014_479_PFL_Fr1.mgf
High	A	eIVDSYLPVILDIIk	17236	Unambiguous	cDNA FLJ54596, highly similar to Proactivator polypeptide OS=Homo sapiens PE=2 SV=1 - [B4DEK5_HUMAN]	9	1	B4DEK5	N-Term(TMT6plex); K15(TMT6plex)	CID	1	0	1	43550	25940	29220	48260	32670	43720	Unique	Used	14044	0	0.00204	1498	1471	2.43	0	1702000	3	730.113	2188.32	0	0.17	2.03	10236	10237	MS2	0/0	0	0	2ms21_2014_479_PFL_Fr1.mgf			43550	25940	29220	48260	32670
High	A	eIVDSYLPVILDIIk	17236	Unambiguous	cDNA FLJ54596, highly similar to Proactivator polypeptide OS=Homo sapiens PE=2 SV=1 - [B4DEK5_HUMAN]	9	1	B4DEK5	N-Term(TMT6plex); K15(TMT6plex)	CID	1	0	1	379800	298600	372700	486800	278200	342700	Unique	Used	14049	0	0.00012	1454	1424	4.55	0	4639000	2	1094.67	2188.33	0	1.32	2.03	10248	10249	MS2	0/0	0	0	2ms21_2014_479_PFL_Fr1.mgf			379800	298600	372700	486800	278200
High	A	aQGFTEDTIVFLPQTDk	5298	Unambiguous	Prostaglandin-H2 D-isomerase OS=Homo sapiens GN=PTGDS PE=1 SV=1 - [PTGDS_HUMAN]	2	1	P41222	N-Term(TMT6plex); K17(TMT6plex)	CID	1	0	1	13100	11930	9799	12770	5639	11230	Unique	Used	14061	0	0.000393	2912	2895	4.84	0	113600	2	1184.64	2368.26	-0.01	-7.03	2.03	10276	10277	MS2	0/0	0	0	2ms21_2014_479_PFL_Fr1.mgf			13100	11930	9799	12770	5639
High	A	mTVSTLVLGEGATEAEISMTSTR	8597	Unambiguous	Protein AMBP OS=Homo sapiens GN=AMBP PE=1 SV=1 - [AMBP_HUMAN]	1	1	P02760	N-Term(TMT6plex)	CID	1	0	1	7112	9013	8389	7711	7610	14420	Unique	Used	14081	0	1.02e-05	2446	2483	4.54	0	338900	3	871.781	2613.33	0	-0.85	2.05	10330	10331	MS2	0/0	0	0	2ms21_2014_479_PFL_Fr1.mgf			7112	9013	8389	7711	7610
High	A	mTVSTLVLGEGATEAEISmTSTR	8597	Unambiguous	Protein AMBP OS=Homo sapiens GN=AMBP PE=1 SV=1 - [AMBP_HUMAN]	1	1	P02760	N-Term(TMT6plex); M19(Oxidation)	CID	1	0	1		10900	3626	5360		7465	No Quan Values	Not Used	14095	0.002	0.0339	2282	2290	3.76	0	140300	3	877.114	2629.33	0	0.72	2.07	10371	10372	MS2	0/0	0	0	2ms21_2014_479_PFL_Fr1.mgf				10900	3626	5360
High	A	aQGFTEDTIVFLPQTDk	5298	Unambiguous	Prostaglandin-H2 D-isomerase OS=Homo sapiens GN=PTGDS PE=1 SV=1 - [PTGDS_HUMAN]	2	1	P41222	N-Term(TMT6plex); K17(TMT6plex)	CID	1	0	1	7662	11340	7999	7683	9359	12430	Unique	Used	14098	0.002	0.0554	2975	3038	3.38	0	199400	3	790.1	2368.29	0	2.29	2.07	10380	10381	MS2	0/0	0	0	2ms21_2014_479_PFL_Fr1.mgf			7662	11340	7999	7683	9359
High	A	aFIQLWAFDAVk	13171	Unambiguous	Protein AMBP OS=Homo sapiens GN=AMBP PE=1 SV=1 - [AMBP_HUMAN]	1	1	P02760	N-Term(TMT6plex); K12(TMT6plex)	CID	1	0	1	152100	143400	103200	226000	99970	192400	Unique	Used	14106	0	0.000481	1959	1876	5.38	0	1269000	2	934.046	1867.08	0	-2.41	2.07	10401	10402	MS2	0/0	0	0	2ms21_2014_479_PFL_Fr1.mgf			152100	143400	103200	226000	99970
Middle	A	mTVSTLVLGEGATEAEISmTSTR	8597	Unambiguous	Protein AMBP OS=Homo sapiens GN=AMBP PE=1 SV=1 - [AMBP_HUMAN]	1	1	P02760	N-Term(TMT6plex); M19(Oxidation)	CID	1	0	1	4822	14210	4464	5826	9140	12960	Unique	Used	14108	0.018	0.339	2260	2249	2.69	0	355500	3	877.113	2629.33	0	-0.19	2.07	10406	10407	MS2	0/0	0	0	2ms21_2014_479_PFL_Fr1.mgf			4822	14210	4464	5826	9140
High	A	eQLGEFYEALDcLR	11143	Unambiguous	Alpha-1-acid glycoprotein 1 OS=Homo sapiens GN=ORM1 PE=1 SV=1 - [A1AG1_HUMAN]	1	1	P02763	N-Term(TMT6plex); C12(Carbamidomethyl)	CID	1	0	1	24550	61150	48150	28730	36360	66840	Unique	Used	14109	0	0.000641	1084	1034	3.62	0	458200	2	986.496	1971.98	0.01	8.18	2.07	10412	10413	MS2	0/0	0	0	2ms21_2014_479_PFL_Fr1.mgf			24550	61150	48150	28730	36360
High	A	eIVDSYLPVILDIIk	17236	Unambiguous	cDNA FLJ54596, highly similar to Proactivator polypeptide OS=Homo sapiens PE=2 SV=1 - [B4DEK5_HUMAN]	9	1	B4DEK5	N-Term(TMT6plex); K15(TMT6plex)	CID	1	0	1	540400	399000	488500	652800	401300	509400	Unique	Used	14112	0	8.59e-05	1455	1429	3.16	0	8369000	3	730.114	2188.33	0	0.67	2.07	10421	10422	MS2	0/0	0	0	2ms21_2014_479_PFL_Fr1.mgf			540400	399000	488500	652800	401300
High	A	eIVDSYLPVILDIIk	17236	Unambiguous	cDNA FLJ54596, highly similar to Proactivator polypeptide OS=Homo sapiens PE=2 SV=1 - [B4DEK5_HUMAN]	9	1	B4DEK5	N-Term(TMT6plex); K15(TMT6plex)	CID	1	0	1	780800	575400	590600	849100	446200	718300	Unique	Used	14115	0	1.25e-05	1450	1419	5.44	0	5633000	2	1094.67	2188.33	0	1.43	2.07	10428	10429	MS2	0/0	0	0	2ms21_2014_479_PFL_Fr1.mgf			780800	575400	590600	849100	446200
High	A	mTVSTLVLGEGATEAEISmTSTR	8597	Unambiguous	Protein AMBP OS=Homo sapiens GN=AMBP PE=1 SV=1 - [AMBP_HUMAN]	1	1	P02760	N-Term(TMT6plex); M19(Oxidation)	CID	1	0	1	7019	11700	6521	8499	8802	8805	Unique	Used	14134	0.001	0.0183	2323	2341	3.48	0	196800	2	1315.17	2629.33	0	3.12	2.08	10480	10481	MS2	0/0	0	0	2ms21_2014_479_PFL_Fr1.mgf			7019	11700	6521	8499	8802
High	A	nLATAYDNFVELVANLk	17650	Unambiguous		0	0		N-Term(TMT6plex); K17(TMT6plex)	CID	1	0	1	6088	18530	9752	6026	15000	17770	No Proteins	Not Used	14136	0.001	0.0151	2741	2724	2.58	0	176700	3	785.111	2353.32	0	0.94	2.08	10485	10486	MS2	0/0	0	0	2ms21_2014_479_PFL_Fr1.mgf			6088	18530	9752	6026	15000
High	A	mTVSTLVLGEGATEAEISMTSTR	8597	Unambiguous	Protein AMBP OS=Homo sapiens GN=AMBP PE=1 SV=1 - [AMBP_HUMAN]	1	1	P02760	N-Term(TMT6plex)	CID	1	0	1	1559	2612	2082	1943	1691	2287	Unique	Used	14138	0	0.000323	2624	2699	6.55	0	76160	2	1307.18	2613.35	0.01	5.86	2.08	10490	10491	MS2	0/0	0	0	2ms21_2014_479_PFL_Fr1.mgf			1559	2612	2082	1943	1691
High	A	mTVSTLVLGEGATEAEISMTSTR	8597	Unambiguous	Protein AMBP OS=Homo sapiens GN=AMBP PE=1 SV=1 - [AMBP_HUMAN]	1	1	P02760	N-Term(TMT6plex); M1(Oxidation)	CID	0.0138	0	1	2949	2270	2520	3865	1647	3123	Unique	Used	14139	0.001	0.00467	2274	2277	3.63	0	165100	2	1315.17	2629.33	0	0.42	2.08	10492	10493	MS2	0/0	0	0	2ms21_2014_479_PFL_Fr1.mgf			2949	2270	2520	3865	1647
High	A	dAEEAISQTIDTIVDmIk	17252	Unambiguous	Collagen alpha-1(VI) chain OS=Homo sapiens GN=COL6A1 PE=4 SV=1 - [A0A087X0S5_HUMAN]	2	1	A0A087X0S5	N-Term(TMT6plex); M16(Oxidation); K18(TMT6plex)	CID	1	0	1	13630	8898	9934	6657	8926	9760	Unique	Used	14153	0	0.000633	3001	3128	4.08	0	98060	2	1233.67	2466.33	0.01	8.98	2.1	10526	10527	MS2	0/0	0	0	2ms21_2014_479_PFL_Fr1.mgf			13630	8898	9934	6657	8926
High	A	mTVSTLVLGEGATEAEISMTSTR	8597	Unambiguous	Protein AMBP OS=Homo sapiens GN=AMBP PE=1 SV=1 - [AMBP_HUMAN]	1	1	P02760	N-Term(TMT6plex)	CID	1	0	1	20820	22440	23050	29770	18890	24430	Unique	Used	14155	0	0.000806	2580	2631	5.78	0	326700	2	1307.18	2613.35	0.01	6.51	2.1	10530	10531	MS2	0/0	0	0	2ms21_2014_479_PFL_Fr1.mgf			20820	22440	23050	29770	18890
High	A	eIPAWVPFDPAAQITk	11377	Unambiguous	Zinc-alpha-2-glycoprotein OS=Homo sapiens GN=AZGP1 PE=1 SV=2 - [ZA2G_HUMAN]	1	1	P25311	N-Term(TMT6plex); K16(TMT6plex)	CID	1	0	1	2684	3967	4686	4726	4038	8198	Unique	Used	14156	0.002	0.032	2547	2613	3.84	0	54880	2	1121.13	2241.25	-0.01	-6.47	2.1	10534	10535	MS2	0/0	0	0	2ms21_2014_479_PFL_Fr1.mgf			2684	3967	4686	4726	4038
High	A	mTVSTLVLGEGATEAEISMTSTR	8597	Unambiguous	Protein AMBP OS=Homo sapiens GN=AMBP PE=1 SV=1 - [AMBP_HUMAN]	1	1	P02760	N-Term(TMT6plex)	CID	1	0	1	9586	6943	8645	9502	8545	14580	Unique	Used	14158	0	0.000289	2483	2545	3.58	0	302900	3	871.782	2613.33	0	0.34	2.1	10540	10541	MS2	0/0	0	0	2ms21_2014_479_PFL_Fr1.mgf			9586	6943	8645	9502	8545
High	A	tVAAPSVFIFPPSDEQLk	9246	Unambiguous	Epididymis luminal protein 213 OS=Homo sapiens GN=HEL-213 PE=2 SV=1 - [V9HW34_HUMAN]|Protein IGKV3-11 OS=Homo sapiens GN=IGKV3-11 PE=4 SV=1 - [A0A087WZW8_HUMAN]	15	2	V9HW34;A0A087WZW8	N-Term(TMT6plex); K18(TMT6plex)	CID	1	0	1	8663	9296	9126	8919	8509	11150	Not Unique	Not Used	14170	0.002	0.0419	2819	2866	3.42	0	290800	3	802.121	2404.35	0	-2.27	2.12	10577	10578	MS2	0/0	0	0	2ms21_2014_479_PFL_Fr1.mgf			8663	9296	9126	8919	8509
High	A	mTVSTLVLGEGATEAEISmTSTR	8597	Unambiguous	Protein AMBP OS=Homo sapiens GN=AMBP PE=1 SV=1 - [AMBP_HUMAN]	1	1	P02760	N-Term(TMT6plex); M19(Oxidation)	CID	1	0	1		11310	11540			8514	No Quan Values	Not Used	14171	0	2.31e-05	2227	2229	3.51	0	195600	3	877.113	2629.33	0	-0.46	2.12	10580	10581	MS2	0/0	0	0	2ms21_2014_479_PFL_Fr1.mgf				11310	11540
High	A	aQGFTEDTIVFLPQTDk	5298	Unambiguous	Prostaglandin-H2 D-isomerase OS=Homo sapiens GN=PTGDS PE=1 SV=1 - [PTGDS_HUMAN]	2	1	P41222	N-Term(TMT6plex); K17(TMT6plex)	CID	1	0	1	9426	8204	6013	11610	8399	12180	Unique	Used	14175	0.001	0.00551	2920	3018	3.64	0	293500	3	790.097	2368.28	0	-1.89	2.12	10590	10591	MS2	0/0	0	0	2ms21_2014_479_PFL_Fr1.mgf			9426	8204	6013	11610	8399
High	A	dSTYSLSSTLTLSk	4222	Unambiguous	Epididymis luminal protein 213 OS=Homo sapiens GN=HEL-213 PE=2 SV=1 - [V9HW34_HUMAN]|Protein IGKV3-11 OS=Homo sapiens GN=IGKV3-11 PE=4 SV=1 - [A0A087WZW8_HUMAN]	16	2	V9HW34;A0A087WZW8	N-Term(TMT6plex); K14(TMT6plex)	CID	1	0	1	66090	51450	57010	45280	43900	63230	Not Unique	Not Used	14176	0	0.000899	2399	2379	5.52	0	487500	2	981.046	1961.08	0	0.21	2.12	10592	10593	MS2	0/0	0	0	2ms21_2014_479_PFL_Fr1.mgf			66090	51450	57010	45280	43900
High	A	aFIQLWAFDAVk	13171	Unambiguous	Protein AMBP OS=Homo sapiens GN=AMBP PE=1 SV=1 - [AMBP_HUMAN]	1	1	P02760	N-Term(TMT6plex); K12(TMT6plex)	CID	1	0	1	134000	135000	104000	214800	85700	174400	Unique	Used	14184	0	0.000838	1801	1731	4.85	0	1168000	2	934.049	1867.09	0	1.38	2.12	10613	10614	MS2	0/0	0	0	2ms21_2014_479_PFL_Fr1.mgf			134000	135000	104000	214800	85700
High	A	eQLGEFYEALDcLR	11143	Unambiguous	Alpha-1-acid glycoprotein 1 OS=Homo sapiens GN=ORM1 PE=1 SV=1 - [A1AG1_HUMAN]	1	1	P02763	N-Term(TMT6plex); C12(Carbamidomethyl)	CID	1	0	1	27980	79290	54800	33370	45850	83070	Unique	Used	14190	0.001	0.00352	662	617	4.07	0	538000	2	986.48	1971.95	-0.01	-7.48	2.12	10629	10630	MS2	0/0	0	0	2ms21_2014_479_PFL_Fr1.mgf			27980	79290	54800	33370	45850
High	A	mTVSTLVLGEGATEAEISMTSTR	8597	Unambiguous	Protein AMBP OS=Homo sapiens GN=AMBP PE=1 SV=1 - [AMBP_HUMAN]	1	1	P02760	N-Term(TMT6plex)	CID	1	0	1	8556	13640	16700	16090		18960	Unique	Used	14235	0	0.000268	2472	2515	3.69	0	231900	3	871.782	2613.33	0	0.06	2.15	10749	10750	MS2	0/0	0	0	2ms21_2014_479_PFL_Fr1.mgf			8556	13640	16700	16090
High	A	tVAAPSVFIFPPSDEQLk	9246	Unambiguous	Epididymis luminal protein 213 OS=Homo sapiens GN=HEL-213 PE=2 SV=1 - [V9HW34_HUMAN]|Protein IGKV3-11 OS=Homo sapiens GN=IGKV3-11 PE=4 SV=1 - [A0A087WZW8_HUMAN]	15	2	V9HW34;A0A087WZW8	N-Term(TMT6plex); K18(TMT6plex)	CID	1	0	1	8292	14410	11020	13350	11660	17060	Not Unique	Not Used	14248	0.002	0.0818	2805	2856	3.13	0	405300	3	802.121	2404.35	0	-1.97	2.17	10787	10788	MS2	0/0	0	0	2ms21_2014_479_PFL_Fr1.mgf			8292	14410	11020	13350	11660
High	A	mTVSTLVLGEGATEAEISmTSTR	8597	Unambiguous	Protein AMBP OS=Homo sapiens GN=AMBP PE=1 SV=1 - [AMBP_HUMAN]	1	1	P02760	N-Term(TMT6plex); M19(Oxidation)	CID	1	0	1		15610				8080	No Quan Values	Not Used	14250	0	0.00254	2187	2192	3.86	0	200200	3	877.113	2629.32	0	-1.09	2.17	10792	10793	MS2	0/0	0	0	2ms21_2014_479_PFL_Fr1.mgf				15610
High	A	aQGFTEDTIVFLPQTDk	5298	Unambiguous	Prostaglandin-H2 D-isomerase OS=Homo sapiens GN=PTGDS PE=1 SV=1 - [PTGDS_HUMAN]	2	1	P41222	N-Term(TMT6plex); K17(TMT6plex)	CID	1	0	1	6984	8667	7780	4685	9216	8353	Unique	Used	14256	0.001	0.0276	2925	3019	4.08	0	340800	3	790.098	2368.28	0	-0.73	2.17	10806	10807	MS2	0/0	0	0	2ms21_2014_479_PFL_Fr1.mgf			6984	8667	7780	4685	9216
High	A	dSTYSLSSTLTLSk	4222	Unambiguous	Epididymis luminal protein 213 OS=Homo sapiens GN=HEL-213 PE=2 SV=1 - [V9HW34_HUMAN]|Protein IGKV3-11 OS=Homo sapiens GN=IGKV3-11 PE=4 SV=1 - [A0A087WZW8_HUMAN]	16	2	V9HW34;A0A087WZW8	N-Term(TMT6plex); K14(TMT6plex)	CID	1	0	1	66040	44400	59910	46260	44210	69570	Not Unique	Not Used	14257	0	0.00208	2399	2371	4.79	0	500900	2	981.047	1961.09	0	1.46	2.17	10810	10811	MS2	0/0	0	0	2ms21_2014_479_PFL_Fr1.mgf			66040	44400	59910	46260	44210
High	A	vVAQGVGIPEDSIFTMADR	7265	Unambiguous	Protein AMBP OS=Homo sapiens GN=AMBP PE=1 SV=1 - [AMBP_HUMAN]	1	1	P02760	N-Term(TMT6plex)	CID	1	0	1	7288	6673	7200	8453	5556	7844	Unique	Used	14259	0	0.000136	2365	2330	3.54	0	72080	2	1117.59	2234.18	0.01	5.15	2.17	10815	10816	MS2	0/0	0	0	2ms21_2014_479_PFL_Fr1.mgf			7288	6673	7200	8453	5556
High	A	aFIQLWAFDAVk	13171	Unambiguous	Protein AMBP OS=Homo sapiens GN=AMBP PE=1 SV=1 - [AMBP_HUMAN]	1	1	P02760	N-Term(TMT6plex); K12(TMT6plex)	CID	1	0	1	217900	193100	142800	341000	132600	258400	Unique	Used	14264	0	0.000535	1855	1766	5.11	0	1731000	2	934.047	1867.09	0	-0.51	2.17	10827	10828	MS2	0/0	0	0	2ms21_2014_479_PFL_Fr1.mgf			217900	193100	142800	341000	132600
High	A	aFIQLWAFDAVk	13171	Unambiguous	Protein AMBP OS=Homo sapiens GN=AMBP PE=1 SV=1 - [AMBP_HUMAN]	1	1	P02760	N-Term(TMT6plex); K12(TMT6plex)	CID	1	0	1	547600	424800	327000	784200	288500	572700	Unique	Used	14278	0	0.000517	1905	1815	4.55	0	3757000	2	934.049	1867.09	0	0.79	2.18	10862	10863	MS2	0/0	0	0	2ms21_2014_479_PFL_Fr1.mgf			547600	424800	327000	784200	288500
Middle	A	aLYFPAGGSSSGTVNPVQNTASSISSTLSk	18196	Unambiguous		0	0		N-Term(TMT6plex); K30(TMT6plex)	CID	1	0	1							No Proteins	Not Used		0.045	0.578	3716	3477	2.78	0	42600	3	1129.6	3386.78	0	-1.8	2.18	10864	10865	MS2	0/0	0	0	2ms21_2014_479_PFL_Fr1.mgf
High	A	mTVSTLVLGEGATEAEISMTSTR	8597	Unambiguous	Protein AMBP OS=Homo sapiens GN=AMBP PE=1 SV=1 - [AMBP_HUMAN]	1	1	P02760	N-Term(TMT6plex)	CID	1	0	1	130600	130600	115700	174500	104100	127000	Unique	Used	14294	0.001	0.00346	2553	2600	5.86	0	1689000	2	1307.17	2613.34	0	2.96	2.18	10918	10919	MS2	0/0	0	0	2ms21_2014_479_PFL_Fr1.mgf			130600	130600	115700	174500	104100
High	A	mTVSTLVLGEGATEAEISMTSTR	8597	Unambiguous	Protein AMBP OS=Homo sapiens GN=AMBP PE=1 SV=1 - [AMBP_HUMAN]	1	1	P02760	N-Term(TMT6plex); M1(Oxidation)	CID	1	0	1	28890	29280	30380	36780	24760	36860	Unique	Used	14295	0.001	0.00724	2226	2227	2.48	0	253600	2	1315.17	2629.33	0	-0.41	2.18	10920	10921	MS2	0/0	0	0	2ms21_2014_479_PFL_Fr1.mgf			28890	29280	30380	36780	24760
High	A	mTVSTLVLGEGATEAEISMTSTR	8597	Unambiguous	Protein AMBP OS=Homo sapiens GN=AMBP PE=1 SV=1 - [AMBP_HUMAN]	1	1	P02760	N-Term(TMT6plex)	CID	1	0	1		5705					No Quan Values	Not Used	14297	0	0.00022	2472	2515	3.22	0	94650	3	871.782	2613.33	0	-0.01	2.2	10950	10951	MS2	0/0	0	0	2ms21_2014_479_PFL_Fr1.mgf				5705
High	A	mTVSTLVLGEGATEAEISmTSTR	8597	Unambiguous	Protein AMBP OS=Homo sapiens GN=AMBP PE=1 SV=1 - [AMBP_HUMAN]	1	1	P02760	N-Term(TMT6plex); M19(Oxidation)	CID	1	0	1				1861		1911	No Quan Values	Not Used	14301	0	0.00175	2216	2212	4.16	0	77620	3	877.113	2629.32	0	-0.6	2.22	10982	10983	MS2	0/0	0	0	2ms21_2014_479_PFL_Fr1.mgf						1861
High	A	aQGFTEDTIVFLPQTDk	5298	Unambiguous	Prostaglandin-H2 D-isomerase OS=Homo sapiens GN=PTGDS PE=1 SV=1 - [PTGDS_HUMAN]	2	1	P41222	N-Term(TMT6plex); K17(TMT6plex)	CID	1	0	1	10470	8643	6919	10740	4681	10670	Unique	Used	14309	0	0.00265	2803	2794	3.15	0	66280	2	1184.63	2368.26	-0.01	-7.76	2.22	11021	11022	MS2	0/0	0	0	2ms21_2014_479_PFL_Fr1.mgf			10470	8643	6919	10740	4681
Middle	A	mHLENVTENFNMWk	18345	Unambiguous		0	0		N-Term(TMT6plex); K14(TMT6plex)	CID	1	0	1	1309			1161	1037		No Proteins	Not Used	14317	0.022	0.405	2218	2103	2.23	0	91170	3	751.06	2251.17	0.01	11.09	2.23	11046	11047	MS2	0/0	0	0	2ms21_2014_479_PFL_Fr1.mgf			1309			1161	1037
High	A	dSTYSLSSTLTLSk	4222	Unambiguous	Epididymis luminal protein 213 OS=Homo sapiens GN=HEL-213 PE=2 SV=1 - [V9HW34_HUMAN]|Protein IGKV3-11 OS=Homo sapiens GN=IGKV3-11 PE=4 SV=1 - [A0A087WZW8_HUMAN]	16	2	V9HW34;A0A087WZW8	N-Term(TMT6plex); K14(TMT6plex)	CID	1	0	1						1218	No Quan Values	Not Used	14323	0.002	0.0953	2435	2402	2.28	0	20200	3	654.367	1961.09	0	0.89	2.23	11061	11062	MS2	0/0	0	0	2ms21_2014_479_PFL_Fr1.mgf
High	A	vVAQGVGIPEDSIFTMADR	7265	Unambiguous	Protein AMBP OS=Homo sapiens GN=AMBP PE=1 SV=1 - [AMBP_HUMAN]	1	1	P02760	N-Term(TMT6plex)	CID	1	0	1	3038	2930	2486	3651	3654	4264	Unique	Used	14325	0	2.29e-05	2234	2214	4.84	0	38430	2	1117.59	2234.17	0	0.78	2.23	11065	11066	MS2	0/0	0	0	2ms21_2014_479_PFL_Fr1.mgf			3038	2930	2486	3651	3654
High	A	tMLLQPAGSLGSYSYR	4743	Unambiguous	Prostaglandin-H2 D-isomerase OS=Homo sapiens GN=PTGDS PE=1 SV=1 - [PTGDS_HUMAN]	4	1	P41222	N-Term(TMT6plex)	CID	1	0	1	4551	7136	7885	5606	4305	9371	Unique	Used	14331	0.003	0.106	2006	1976	3.34	0	74630	2	987.028	1973.05	0.01	6.68	2.23	11079	11080	MS2	0/0	0	0	2ms21_2014_479_PFL_Fr1.mgf			4551	7136	7885	5606	4305
High	A	mTVSTLVLGEGATEAEISMTSTR	8597	Unambiguous	Protein AMBP OS=Homo sapiens GN=AMBP PE=1 SV=1 - [AMBP_HUMAN]	1	1	P02760	N-Term(TMT6plex); M1(Oxidation)	CID	1	0	1		1200		1945	952.5	1983	No Quan Values	Not Used	14335	0	0.0019	2279	2305	3.86	0	146900	2	1315.17	2629.33	0	2.28	2.23	11089	11090	MS2	0/0	0	0	2ms21_2014_479_PFL_Fr1.mgf				1200		1945	952.5
High	A	gEcVPGEQEPEPILIPR	4588	Unambiguous	Protein AMBP OS=Homo sapiens GN=AMBP PE=1 SV=1 - [AMBP_HUMAN]	1	1	P02760	N-Term(TMT6plex); C3(Carbamidomethyl)	CID	1	0	1	5674	2836	3755	5698	3237	3846	Unique	Used	14340	0	0.00272	2119	2210	4.07	0	45450	2	1075.07	2149.13	0.01	6.29	2.25	11100	11101	MS2	0/0	0	0	2ms21_2014_479_PFL_Fr1.mgf			5674	2836	3755	5698	3237
High	A	mTVSTLVLGEGATEAEISMTSTR	8597	Unambiguous	Protein AMBP OS=Homo sapiens GN=AMBP PE=1 SV=1 - [AMBP_HUMAN]	1	1	P02760	N-Term(TMT6plex)	CID	1	0	1		1118					No Quan Values	Not Used	14352	0	4.6e-05	2279	2265	3.72	0	23750	3	871.778	2613.32	0	-4.7	2.25	11129	11130	MS2	0/0	0	0	2ms21_2014_479_PFL_Fr1.mgf				1118
Middle	A	mEYLSLNILNGNTPEQVNYTEWk	8847	Unambiguous		0	0		N-Term(TMT6plex); M1(Oxidation); K23(TMT6plex)	CID	1	0	1	1147						No Proteins	Not Used	14353	0.031	0.476	3771	3872	2.98	0	23110	3	1077.57	3230.68	0.01	12.1	2.25	11131	11132	MS2	0/0	0	0	2ms21_2014_479_PFL_Fr1.mgf			1147
Middle	A	aIPVAQDLNAPSDWDSR	5903	Unambiguous	Isoform D of Osteopontin OS=Homo sapiens GN=SPP1 - [OSTP_HUMAN]	6	1	P10451-4	N-Term(TMT6plex)	CID	1	0	1			1380				No Quan Values	Not Used	14356	0.02	0.375	1292	1265	2.17	0	6130	3	695.353	2084.04	-0.01	-8.12	2.25	11138	11139	MS2	0/0	0	0	2ms21_2014_479_PFL_Fr1.mgf					1380
High	A	gSIQVDGEELVSGR	4170	Unambiguous	Heparan sulfate proteoglycan 2 (Perlecan), isoform CRA_b OS=Homo sapiens GN=HSPG2 PE=4 SV=1 - [A0A024RAB6_HUMAN]	3	1	A0A024RAB6	N-Term(TMT6plex)	CID	1	0	1	1093	1243		1207	1058		Unique	Used	14361	0.001	0.0131	1840	1822	4.48	0	14580	2	837.958	1674.91	0.01	13.97	2.25	11151	11152	MS2	0/0	0	0	2ms21_2014_479_PFL_Fr1.mgf			1093	1243		1207	1058
High	A	dIQMTQSPSSLSASVGDR	2626	Unambiguous	Ig kappa chain V-I region Scw OS=Homo sapiens PE=1 SV=1 - [KV117_HUMAN]	1	1	P01609	N-Term(TMT6plex)	CID	0.0276	0	1							No Quan Values	Not Used		0	0.000635	1273	1359	3.26	0	6756	3	703.357	2108.06	0	3.17	2.27	11155	11156	MS2	0/0	0	0	2ms21_2014_479_PFL_Fr1.mgf
High	A	mTVSTLVLGEGATEAEISmTSTR	8597	Unambiguous	Protein AMBP OS=Homo sapiens GN=AMBP PE=1 SV=1 - [AMBP_HUMAN]	1	1	P02760	N-Term(TMT6plex); M19(Oxidation)	CID	1	0	1							No Quan Values	Not Used		0.001	0.0161	2133	2123	3.56	0	14690	3	877.111	2629.32	0	-2.76	2.27	11168	11169	MS2	0/0	0	0	2ms21_2014_479_PFL_Fr1.mgf
High	A	aQGFTEDTIVFLPQTDk	5298	Unambiguous	Prostaglandin-H2 D-isomerase OS=Homo sapiens GN=PTGDS PE=1 SV=1 - [PTGDS_HUMAN]	2	1	P41222	N-Term(TMT6plex); K17(TMT6plex)	CID	1	0	1							No Quan Values	Not Used	14373	0.001	0.0102	2910	3010	3.82	0	17940000	3	790.097	2368.28	0	-1.04	2.27	11182	11183	MS2	0/0	0	0	2ms21_2014_479_PFL_Fr1.mgf
High	A	dSTYSLSSTLTLSk	4222	Unambiguous	Epididymis luminal protein 213 OS=Homo sapiens GN=HEL-213 PE=2 SV=1 - [V9HW34_HUMAN]|Protein IGKV3-11 OS=Homo sapiens GN=IGKV3-11 PE=4 SV=1 - [A0A087WZW8_HUMAN]	16	2	V9HW34;A0A087WZW8	N-Term(TMT6plex); K14(TMT6plex)	CID	1	0	1	53610	33940	43450	28990	29620	45420	Not Unique	Not Used	14376	0	0.000127	2432	2397	4.97	0	49360000	2	981.047	1961.09	0	0.9	2.27	11189	11190	MS2	0/0	0	0	2ms21_2014_479_PFL_Fr1.mgf			53610	33940	43450	28990	29620
High	A	dSTYSLSSTLTLSk	4222	Unambiguous	Epididymis luminal protein 213 OS=Homo sapiens GN=HEL-213 PE=2 SV=1 - [V9HW34_HUMAN]|Protein IGKV3-11 OS=Homo sapiens GN=IGKV3-11 PE=4 SV=1 - [A0A087WZW8_HUMAN]	16	2	V9HW34;A0A087WZW8	N-Term(TMT6plex); K14(TMT6plex)	CID	1	0	1	10910	5624	8187	6284	5877	9569	Not Unique	Not Used	14403	0	0.00231	2400	2381	1.89	0	3018000	3	654.366	1961.08	0	0.05	2.28	11255	11256	MS2	0/0	0	0	2ms21_2014_479_PFL_Fr1.mgf			10910	5624	8187	6284	5877
High	A	gVcEETSGAYEk	1665	Unambiguous	Protein AMBP OS=Homo sapiens GN=AMBP PE=1 SV=1 - [AMBP_HUMAN]	1	1	P02760	N-Term(TMT6plex); C3(Carbamidomethyl); K12(TMT6plex)	CID	1	0	1			915.6	1218			No Quan Values	Not Used	14425	0	0.00249	713	726	2.81	0	8807	3	596.634	1787.89	0	-0.2	2.3	11307	11308	MS2	0/0	0	0	2ms21_2014_479_PFL_Fr1.mgf					915.6	1218
High	A	dIQMTQSPSSLSASVGDR	2626	Unambiguous	Ig kappa chain V-I region Scw OS=Homo sapiens PE=1 SV=1 - [KV117_HUMAN]	1	1	P01609	N-Term(TMT6plex)	CID	0.0369	0	1							No Quan Values	Not Used		0.001	0.00765	1240	1310	3.25	0	7374	3	703.356	2108.05	0	1.34	2.32	11365	11366	MS2	0/0	0	0	2ms21_2014_479_PFL_Fr1.mgf
High	A	dSTYSLSSTLTLSk	4222	Unambiguous	Epididymis luminal protein 213 OS=Homo sapiens GN=HEL-213 PE=2 SV=1 - [V9HW34_HUMAN]|Protein IGKV3-11 OS=Homo sapiens GN=IGKV3-11 PE=4 SV=1 - [A0A087WZW8_HUMAN]	16	2	V9HW34;A0A087WZW8	N-Term(TMT6plex); K14(TMT6plex)	CID	1	0	1	1172		1247	1516	1344	1977	Not Unique	Not Used	14459	0	0.000565	2364	2348	4.48	0	13850	2	981.042	1961.08	0	-3.65	2.32	11394	11395	MS2	0/0	0	0	2ms21_2014_479_PFL_Fr1.mgf			1172		1247	1516	1344
High	A	gVcEETSGAYEk	1665	Unambiguous	Protein AMBP OS=Homo sapiens GN=AMBP PE=1 SV=1 - [AMBP_HUMAN]	1	1	P02760	N-Term(TMT6plex); C3(Carbamidomethyl); K12(TMT6plex)	CID	1	0	1		1230	1751	1319	1009	1047	No Quan Values	Not Used	14492	0	0.00237	899	937	3.32	0	10080	2	894.455	1787.9	0.01	7.76	2.33	11473	11474	MS2	0/0	0	0	2ms21_2014_479_PFL_Fr1.mgf				1230	1751	1319	1009
High	A	gVcEETSGAYEk	1665	Unambiguous	Protein AMBP OS=Homo sapiens GN=AMBP PE=1 SV=1 - [AMBP_HUMAN]	1	1	P02760	N-Term(TMT6plex); C3(Carbamidomethyl); K12(TMT6plex)	CID	1	0	1				1087			No Quan Values	Not Used	14507	0	0.00115	666	682	3.06	0	8056	3	596.634	1787.89	0	-0.92	2.35	11510	11511	MS2	0/0	0	0	2ms21_2014_479_PFL_Fr1.mgf						1087
Middle	A	dSTYSLSSTLTLSk	4222	Unambiguous	Epididymis luminal protein 213 OS=Homo sapiens GN=HEL-213 PE=2 SV=1 - [V9HW34_HUMAN]|Protein IGKV3-11 OS=Homo sapiens GN=IGKV3-11 PE=4 SV=1 - [A0A087WZW8_HUMAN]	16	2	V9HW34;A0A087WZW8	N-Term(TMT6plex); K14(TMT6plex)	CID	1	0	1							No Quan Values	Not Used	14561	0.012	0.205	2713	2718	1.95	0	5000	3	654.372	1961.1	0.01	8.64	2.38	11654	11655	MS2	0/0	0	0	2ms21_2014_479_PFL_Fr1.mgf
High	A	gVcEETSGAYEk	1665	Unambiguous	Protein AMBP OS=Homo sapiens GN=AMBP PE=1 SV=1 - [AMBP_HUMAN]	1	1	P02760	N-Term(TMT6plex); C3(Carbamidomethyl); K12(TMT6plex)	CID	1	0	1							No Quan Values	Not Used	14571	0	0.00304	681	694	2.64	0	8490	3	596.634	1787.89	0	-0.41	2.4	11699	11700	MS2	0/0	0	0	2ms21_2014_479_PFL_Fr1.mgf
High	A	gVcEETSGAYEk	1665	Unambiguous	Protein AMBP OS=Homo sapiens GN=AMBP PE=1 SV=1 - [AMBP_HUMAN]	1	1	P02760	N-Term(TMT6plex); C3(Carbamidomethyl); K12(TMT6plex)	CID	1	0	1							No Quan Values	Not Used	14576	0	0.00299	714	734	1.44	0	5088	3	596.635	1787.89	0	0.82	2.45	11871	11872	MS2	0/0	0	0	2ms21_2014_479_PFL_Fr1.mgf
High	B	kNQcETR	19478	Unambiguous	Prostaglandin-H2 D-isomerase OS=Homo sapiens GN=PTGDS PE=1 SV=1 - [PTGDS_HUMAN]	4	1	P41222	N-Term(TMT6plex); K1(TMT6plex); C4(Carbamidomethyl)	CID	1	0	1	281600	245300	185400	295000	148700	274500	Unique	Used	9337	0.007	0.241	1259	1331	1.56	1	2320000	3	465.259	1393.76	0	-0.63	0.32	504	505	MS2	0/0	0	0	2ms21_2014_479_PFL_Fr2.mgf			281600	245300	185400	295000	148700
High	B	aSVDSGSSEEQGGSSR	213	Unambiguous	Polymeric immunoglobulin receptor OS=Homo sapiens GN=PIGR PE=1 SV=4 - [PIGR_HUMAN]	1	1	P01833	N-Term(TMT6plex)	CID	1	0	1							No Quan Values	Not Used		0	0.00247	249	223	2.88	0	7486	3	590.276	1768.81	0	-0.12	0.32	521	522	MS2	0/0	0	0	2ms21_2014_479_PFL_Fr2.mgf
[truncated: 9,713 more rows]
[truncated: 7 more columns]

## Sheet: Unique
Confidence Level	Search ID	Sequence	Unique Sequence ID	PSM Ambiguity	Protein Descriptions	# Proteins	# Protein Groups	Protein Group Accessions	Modifications	Activation Type	DeltaScore	DeltaCn	Rank	Quan Info	Quan Usage	QuanResultID	q-Value	PEP	Decoy Peptides Matched	Peptides Matched	XCorr	# Missed Cleavages	Intensity	Charge	m/z [Da]	MH+ [Da]	Delta Mass [Da]	Delta Mass [PPM]	RT [min]	First Scan	Last Scan	MS Order	Ions Matched	Matched Ions	Total Ions	Spectrum File	Annotation		Pool1_Control	Pool1_Basal	Pool1_Tratado	Pool2_Control	Pool2_Basal	Pool2_Tratado	Pool3_Control	Pool3_Basal	Pool3_Tratado	Pool4_Control	Pool4_Basal
[truncated: 6,610 more rows]
[truncated: 1 more columns]

[truncated: 6 more sheets: All_comparisons, basal vs control, treated vs basal, treated vs control, Key proteins DN, Key proteins losartan]
